# Supplementary material for: What is the true discharge rate and pattern of the striatal projection neurons in Parkinson’s disease and Dystonia?
Source: eLife. 2020 Aug 19;9:e57445. doi: 10.7554/eLife.57445 (PMC7462612; doi:10.7554/eLife.57445)
Supplement: Figure 2—source data 1. [file elife-57445-fig2-data1.xls]

## Sheet: Sheet1
PD_FR_funct_IsoSC
24.1854	2.15319	2.15319	2.15319	2.15319	2.15319	2.15319	2.15319	2.15319	1.04909
28.6779	7.02634	7.02634	7.02634	7.02634	7.02634	7.02634	42.5312	17.7638	0.283428
33.7685	57.7316	28.0381	28.0381	18.9877	18.9877	42.5312	17.7638	1.04909	5.8211
25.8096	16.9419	18.9877	18.9877	7.57322	42.5312	17.7638	1.04909	13.1312	2.94513
22.86	28.0381	26.0209	26.0209	42.5312	17.7638	1.04909	5.06548	1.56339	2.73815
2.15319	53.7399	7.57322	7.57322	32.2347	1.04909	5.06548	13.1312	9.43745	3.86007
7.02634	18.9877	6.92177	6.92177	17.7638	33.5898	6.81905	2.39653	2.49279	1.07784
57.7316	26.0209	42.5312	42.5312	1.04909	2.26512	13.1312	5.37715	1.03181
16.9419	50.5916	32.2347	32.2347	33.5898	5.06548	2.71309	3.71836	58.9762
23.8023	7.57322	17.7638	17.7638	2.26512	6.81905	2.39653	7.41129	0.283428
23.3854	6.92177	1.04909	1.04909	5.06548	13.1312	5.37715	1.56339	5.8211
26.7912	32.3001	33.5898	33.5898	6.81905	2.71309	0.546513	1.37541	0.320026
20.7509	42.5312	2.26512	2.26512	13.1312	2.39653	3.71836	9.43745	26.4965
23.5427	32.2347	5.06548	5.06548	2.71309	2.21475	5.35604	3.0028	2.68661
28.0381	17.7638	11.5014	6.81905	4.20001	5.37715	7.41129	1.16113	7.03108
53.7399	1.04909	6.81905	6.6488	2.39653	0.546513	11.6866	6.01265	2.94513
20.4981	33.5898	6.6488	13.1312	2.21475	3.71836	1.56339	1.63885	17.0794
18.9877	2.26512	22.6479	2.71309	10.8594	2.50577	33.935	2.49285	2.73815
23.364	75.5469	13.1312	4.20001	5.37715	5.35604	26.5486	2.36831	16.153
26.0209	7.37877	2.71309	2.39653	0.546513	0.929699	1.37541	4.0403	12.4258
18.9866	5.06548	4.20001	2.21475	3.71836	0.468675	13.2573	2.53503	24.8264
25.6148	21.5911	2.39653	10.8594	2.50577	19.2378	7.40199	2.49279	34.3101
50.5916	11.5014	2.21475	5.37715	5.35604	7.41129	9.43745	1.03181	3.86007
7.57322	60.4265	10.8594	0.546513	0.929699	11.6866	3.0028	58.9762	1.07784
6.92177	6.81905	22.009	3.71836	0.468675	1.56339	1.19215	9.11854
34.7712	6.6488	5.37715	2.50577	19.2378	33.935	1.16113	3.86999
32.3001	22.6479	0.546513	5.35604	24.7942	26.5486	6.01265	0.283428
20.826	13.1312	3.71836	0.929699	20.8604	1.37541	1.63885	2.3263
25.6012	61.9639	2.50577	8.38284	7.41129	13.2573	2.49285	2.92751
24.4227	2.71309	5.35604	0.468675	11.6866	7.40199	2.36831	5.8211
21.7436	4.20001	0.929699	19.2378	1.56339	9.43745	4.0403	0.320026
22.7317	15.7601	8.38284	24.7942	33.935	3.0028	2.53503	28.4267
42.5312	2.39653	0.468675	20.8604	26.5486	5.07639	11.163	14.5758
32.2347	2.21475	19.2378	7.41129	1.37541	1.41378	0.804554	9.01935
17.7638	79.0669	24.7942	11.6866	13.2573	1.19215	2.49279	2.98726
30.7763	10.8594	20.8604	21.0679	67.1659	1.16113	1.03181	26.4965
26.6535	22.009	7.41129	1.56339	7.40199	15.7809	0.676427	4.65233
19.084	5.37715	11.6866	33.935	6.78298	4.76566	3.21062	2.68661
24.5577	0.546513	21.0679	26.5486	9.43745	1.13752	1.01874	23.9057
26.3567	3.71836	1.56339	1.37541	3.0028	6.01265	58.9762	29.2872
23.7045	2.50577	33.935	13.2573	5.07639	1.63885	4.29187	7.03108
27.0215	13.9805	26.5486	67.1659	1.51355	2.49285	41.0817	4.56739
27.0621	5.35604	1.37541	7.40199	1.41378	2.36831	9.11854	2.94513
27.5944	78.6819	13.2573	6.78298	1.19215	4.0403	3.86999	6.89086
24.2691	0.929699	67.1659	7.61168	1.16113	2.53503	0.283428	6.3168
1.04909	8.38284	55.945	9.43745	15.7809	0.351615	2.3263	17.0794
25.1673	0.468675	7.40199	3.0028	16.9643	2.77618	2.92751	1.42784
21.2945	19.2378	6.78298	3.90305	4.76566	11.163	9.59981	2.73815
2.23492	24.7942	7.61168	5.45137	1.13752	0.804554	5.38094	16.153
33.5898	74.3205	9.43745	5.07639	6.01265	3.35478	5.8211	2.41077
2.26512	20.1007	3.0028	1.51355	1.63885	2.49279	1.43723	12.4258
75.5469	20.8604	3.90305	1.41378	2.49285	1.03181	0.320026	24.8264
19.1608	66.4082	5.45137	1.19215	7.7153	0.676427	28.4267	25.195
34.4435	37.1951	5.07639	1.16113	2.36831	17.9488	14.5758	34.3101
35.0512	7.41129	1.51355	15.7809	4.0403	3.21062	27.9217	3.86007
29.1224	81.0318	1.41378	16.9643	2.53503	1.01874	8.38443	8.32114
7.37877	11.6866	1.19215	4.76566	0.351615	58.9762	9.01935	1.53902
23.2859	21.0679	1.16113	1.13752	54.0157	53.9692	2.46933	11.9514
5.06548	19.0342	15.7809	29.0513	16.5221	34.6332	0.649918	26.5419
45.2722	1.56339	16.9643	6.01265	1.95934	9.9461	2.98726	11.4324
27.5779	33.935	4.76566	1.63885	2.77618	4.29187	8.05935	22.2261
22.3537	26.5486	1.13752	2.49285	2.36425	56.9233	28.2404	28.5254
28.387	82.1686	29.0513	7.7153	6.99523	41.0817	26.4965	1.07784
21.5911	1.37541	6.01265	2.36831	11.163	17.2294	4.65233	3.84489
27.9506	13.2573	1.63885	4.0403	0.804554	9.11854	2.68661	1.31311
27.2579	6.26224	2.49285	2.53503	3.35478	3.86999	23.9057
15.0775	46.3385	7.7153	0.351615	2.49279	0.283428	29.2872
11.5014	67.1659	2.36831	54.0157	1.03181	2.3263	7.03108
64.3143	55.945	10.0397	16.1605	0.676427	2.92751	4.56739
60.4265	57.893	4.0403	8.20435	29.3543	9.59981	4.11588
16.532	56.039	2.53503	16.5221	17.9488	13.9408	2.94513
6.81905	7.40199	0.351615	1.95934	3.21062	1.23276	6.89086
6.6488	6.78298	54.0157	2.77618	1.01874	5.38094	1.21298
21.2593	3.13157	19.5426	2.36425	58.9762	5.8211	6.3168
25.4688	21.2286	16.1605	6.99523	53.9692	1.43723	11.6985
28.4768	7.61168	8.20435	11.163	34.6332	0.320026	1.89207
22.6479	76.12	16.5221	0.804554	9.9461	28.4267	22.2758
13.1312	9.43745	12.7295	3.35478	23.4066	14.5758	17.0794
16.6547	3.0028	1.95934	2.49279	4.29187	32.9215	9.4901
63.9142	41.5162	2.77618	1.03181	56.9233	27.9217	6.2014
24.3375	3.90305	2.36425	0.676427	41.0817	8.38443	2.76728
50.2248	5.45137	6.99523	29.3543	17.2294	9.01935	49.8339
16.1938	5.07639	11.163	17.9488	9.11854	20.6499	14.2778
22.4928	1.51355	0.804554	2.16988	3.86999	2.46933	1.42784
58.2232	53.9649	3.35478	3.21062	0.283428	0.649918	2.73815
61.9639	1.41378	2.49279	1.01874	27.2696	2.98726	3.75732
2.71309	1.19215	1.03181	58.9762	2.3263	8.05935	16.153
4.20001	1.16113	0.676427	61.6581	22.4462	28.2404	2.41077
20.0295	15.7809	29.3543	53.9692	2.92751	26.4965	12.4258
24.2781	16.9643	17.9488	34.6332	7.11236	2.903	24.8264
27.1137	4.76566	2.16988	9.9461	9.59981	4.65233	25.195
19.1974	1.13752	3.21062	13.9858	13.9408	2.68661	34.3101
15.8377	29.0513	1.01874	23.4066	28.8879	30.1553	50.6262
51.8006	66.2851	58.9762	4.29187	1.23276	23.9057	46.323
61.2474	24.3462	63.7425	56.9233	5.38094	29.2872	63.5533
65.7243	6.01265	59.8098	41.0817	24.2531	7.03108	3.67124
29.3703	81.5397	61.6581	17.2294	6.14774	4.56739	46.241
22.9757	1.63885	53.9692	1.5892	5.8211	9.30031	3.86007
25.4453	2.49285	34.6332	19.8966	1.43723	2.92587	4.83615
26.4914	7.7153	39.2258	9.11854	0.271576	4.11588	8.32114
24.867	7.1022	9.9461	2.18993	0.320026	14.8048	1.53902
15.7601	2.36831	13.9858	3.86999	28.4267	2.94513	34.4282
15.7659	10.0397	23.4066	0.283428	14.5758	6.89086	53.2805
21.706	4.0403	4.29187	27.2696	32.9215	1.21298	11.9514
17.6713	91.1258	65.8751	2.3263	23.7384	20.6278	9.5424
2.39653	2.53503	56.9233	22.4462	27.9217	6.3168	26.5419
2.21475	0.351615	41.0817	2.92751	8.38443	11.6985	6.20724
24.0333	40.01	17.2294	7.11236	9.01935	1.92922	11.4324
16.3804	42.6319	1.5892	9.59981	20.6499	1.89207	13.5027
72.6513	54.0157	23.6937	13.9408	2.46933	8.4936	9.74655
65.8076	84.9849	19.8966	67.39	5.16144	22.2758	22.2261
79.0669	19.5426	9.11854	67.9642	0.649918	17.0794	28.5254
24.5012	16.1605	2.18993	54.74	2.37223	32.4596	1.07784
10.8594	8.20435	3.86999	28.8879	2.98726	9.4901	3.84489
30.1864	89.4536	20.1855	1.23276	8.05935	6.2014	1.31311
13.3332	56.6713	6.47902	5.38094	28.2404	2.76728
58.5617	16.5221	0.283428	24.2531	31.6671	15.9187
15.9429	12.7295	27.2696	6.14774	2.97461	20.043
83.1281	1.95934	2.3263	5.8211	4.46095	49.8339
22.009	2.77618	22.4462	29.6581	26.4965	35.7646
25.5282	121.127	2.92751	1.43723	2.903	33.2209
22.3245	163.265	7.11236	0.271576	4.65233	33.1755
22.5678	155.479	9.59981	0.320026	28.9766	41.6274
5.37715	2.36425	54.0423	28.4267	2.68661	14.2778
18.1488	6.99523	33.7011	14.5758	39.0342	1.42784
23.8066	88.7345	13.9408	32.9215	30.1553	5.46732
24.2056	120.603	67.39	23.7384	23.9057	2.73815
25.6679	110.461	46.1433	65.8558	29.2872	3.75732
0.546513	162.455	67.9642	27.9217	7.03108	16.153
17.7553	115.929	54.74	51.746	4.56739	28.5584
18.972	149.033	28.8879	8.38443	9.30031	2.41077
26.6948	22.869	1.23276	9.01935	9.55414	12.4258
3.71836	147.034	5.38094	28.4932	2.92587	24.8264
21.851	11.163	24.2531	20.6499	4.11588	25.195
37.9579	106.263	6.14774	2.46933	14.8048	13.315
20.731	139.148	29.9861	5.16144	2.94513	44.5199
22.0365	0.804554	5.8211	0.649918	7.17487	34.3101
16.1938	3.35478	29.6581	2.37223	6.89086	50.6262
23.2733	2.49279	1.43723	2.98726	1.21298	46.323
29.844	1.03181	0.271576	34.0605	9.5542	63.5533
30.6501	0.676427	0.320026	8.05935	20.6278	16.5214
15.4379	29.3543	28.4267	23.1695	6.3168	3.67124
27.5858	17.9488	29.8793	3.23725	11.6985	3.37932
25.6212	123.614	14.5758	2.81025	1.92922	46.241
2.50577	2.16988	6.03485	28.2404	1.89207	41.2104
23.5702	3.21062	32.9215	31.6671	8.4936	3.86007
25.0741	1.01874	23.7384	16.5746	22.2758	4.83615
25.2485	36.8879	65.8558	2.97461	17.0794	22.3984
23.1881	58.9762	27.9217	10.1908	32.4596	8.32114
13.9225	103.76	71.2736	28.3429	9.4901	0.952929
13.9805	63.7425	51.746	4.46095	22.0217	1.53902
27.1138	59.8098	114.635	26.4965	6.2014	3.68468
25.2653	61.6581	8.38443	2.903	3.51821	34.4282
5.35604	115.885	19.9444	4.65233	1.38126	53.2805
22.7461	90.6301	9.01935	11.7468	7.37974	12.7874
30.4461	93.0402	28.4932	5.6973	2.76728	10.6976
78.6819	43.4115	20.6499	28.9766	0.606407	11.9514
17.961	51.897	2.46933	2.68661	45.5209	9.5424
0.929699	53.9692	5.16144	34.4166	15.9187	26.5419
8.38284	34.6332	0.649918	39.0342	20.043	6.20724
23.8907	86.0355	2.37223	30.1553	49.8339	11.4324
27.3487	41.0077	2.98726	23.9057	48.4249	13.5027
23.6588	74.611	34.0605	29.2872	35.7646	9.74655
25.3367	73.2298	14.8187	46.198	33.2209	22.2261
38.718	93.762	8.05935	72.678	33.1755	24.9847
28.9755	42.8112	33.7539	7.03108	41.6274	28.5254
28.2455	29.0981	23.1695	4.56739	22.2454	1.07784
27.0112	39.6205	3.23725	6.95146	14.2778	3.84489
21.9331	55.3895	2.81025	9.30031	2.78501	80.5787
14.5233	48.683	28.2404	9.55414	41.5954	5.09415
21.0991	39.2258	31.6671	2.92587	8.27563	18.4969
12.2282	27.2582	16.5746	4.11588	1.42784	1.31311
19.4922	38.6159	2.97461	14.8048	5.26809
21.5513	70.635	13.5245	2.94513	5.46732
29.3071	46.4629	10.1908	7.17487	2.73815
16.1306	16.6583	28.3429	6.89086	3.75732
15.0913	33.5655	3.233	10.6325	16.153
15.5317	30.6069	9.57522	1.21298	28.5584
13.1351	37.7391	4.46095	9.5542	17.367
15.7445	37.2016	26.4965	20.0875	7.49383
0.468675	52.4472	47.098	20.6278	20.4974
19.0913	57.1237	2.903	6.3168	2.41077
26.4713	51.3622	4.65233	11.6985	12.4258
21.7861	20.1367	11.7468	1.92922	24.8264
18.3924	41.3236	5.6973	0.735883	25.195
18.7192	58.1027	9.23145	1.63697	13.315
19.877	9.9461	4.64512	1.89207	44.5199
12.2625	13.9858	28.9766	8.4936	34.3101
17.7619	23.4066	2.68661	21.3054	50.6262
25.788	39.4357	34.4166	22.2758	46.323
16.7904	4.29187	39.0342	17.0794	7.56288
15.5393	65.8751	30.1553	32.4596	63.5533
19.9699	56.9233	13.5768	9.4901	65.3333
21.1822	41.0817	23.9057	10.5646	16.5214
17.6439	17.2294	29.2872	22.0217	23.1117
17.9275	1.5892	46.198	6.2014	3.67124
12.2983	23.6937	72.678	4.15596	3.37932
17.5146	49.2468	7.03108	3.51821	46.241
13.5828	39.6182	4.56739	1.38126	41.2104
20.9041	19.8966	5.30033	5.98668	3.86007
20.5312	72.6296	6.95146	7.37974	4.83615
25.9345	71.0533	9.30031	2.76728	4.65997
23.8623	76.2981	9.55414	0.606407	22.3984
14.6295	9.11854	2.92587	35.177	8.32114
3.72806	67.4994	4.11588	45.5209	0.952929
25.0568	75.0757	14.8048	35.7949	1.53902
19.2378	63.9626	2.94513	15.9187	3.68468
24.7942	32.7635	7.17487	20.043	34.4282
42.0023	134.134	6.89086	49.8339	53.2805
24.1188	38.3394	7.62433	48.4249	12.7874
74.3205	2.18993	10.6325	35.7646	10.6976
27.4474	3.86999	1.21298	51.2593	11.9514
26.7454	20.1855	9.5542	14.8519	9.5424
20.1007	6.47902	20.0875	33.2209	26.5419
30.6092	0.283428	20.6278	33.1755	25.7581
20.8604	27.2696	40.0665	41.6274	6.20724
66.4082	30.5455	33.7043	22.2454	11.4324
37.1951	2.3263	6.3168	14.2778	30.4659
22.8856	22.4462	11.6985	2.78501	11.856
7.41129	2.92751	13.9551	41.5954	13.5027
24.5702	7.11236	1.92922	8.27563	8.42707
17.7357	9.59981	0.735883	1.96281	7.11854
81.0318	54.0423	1.63697	1.42784	9.74655
64.7296	62.84	1.89207	9.09383	75.2109
11.6866	33.7011	8.4936	5.26809	26.1205
26.8691	13.9408	21.3054	5.46732	22.2261
21.0679	67.39	22.2758	2.73815	24.9847
19.0342	46.1433	17.0794	3.75732	28.5254
23.3259	67.9642	15.6181	16.153	1.07784
1.56339	24.9019	32.4596	28.5584	3.84489
20.5951	78.8626	9.4901	17.367	56.4642
60.7472	47.0211	10.5646	7.49383	80.5787
33.935	54.74	22.0217	20.4974	5.09415
26.5486	21.0354	6.2014	2.41077	18.4969
22.0886	28.8879	4.15596	12.4258	1.31311
82.1686	120.822	3.51821	29.9405
23.3914	1.23276	1.38126	24.8264
21.8603	154.228	5.98668	25.195
32.977	5.38094	7.37974	13.315
24.3303	140.003	2.45311	44.5199
30.6098	134.867	2.76728	22.608
28.5773	135.047	0.606407	34.3101
32.4292	9.48239	35.177	50.6262
21.9177	102.918	45.5209	23.7397
1.37541	24.2531	35.7949	46.323
13.2573	44.1578	15.9187	7.56288
6.26224	58.6683	20.043	63.0468
24.9754	86.4989	49.8339	44.2199
24.335	6.14774	48.4249	63.5533
38.5934	29.9861	35.7646	65.3333
29.6645	5.8211	51.2593	16.5214
17.762	35.683	14.8519	23.1117
24.1282	66.3009	33.2209	3.67124
15.371	29.6581	33.1755	3.37932
46.3385	1.43723	41.6274	25.1962
67.1659	0.271576	22.2454	46.241
28.3235	7.39354	14.2778	15.4655
55.945	0.320026	2.78501	31.4217
25.0813	28.4267	33.4653	41.2104
39.6746	58.8035	41.5954	3.86007
34.0257	29.8793	8.27563	4.83615
27.4141	23.1913	1.96281	4.65997
19.8645	14.5758	26.3161	22.3984
57.893	6.03485	33.9932	8.32114
26.5926	32.9215	39.4233	0.952929
23.9481	109.784	19.2343	1.53902
32.7918	103.483	1.42784	3.68468
56.039	31.549	9.09383	34.4282
52.2528	23.7384	5.26809	29.9396
24.1751	65.8558	26.5571	53.2805
44.0187	27.9217	7.69642	37.0734
16.557	40.1347	5.46732	34.6015
22.157	71.2736	2.73815	12.7874
32.7379	51.746	9.76224	10.6976
22.313	58.7726	3.75732	11.9514
27.9463	68.2947	16.153	9.5424
39.0375	78.1289	48.8648	26.5419
28.414	45.0287	28.5584	25.7581
21.7332	75.2896	17.367	15.02
24.3396	114.635	2.54742	6.20724
28.3235	118.477	7.49383	2.90283
18.5241	8.38443	20.4974	11.4324
37.115	97.6074	2.41077	30.4659
26.7393	75.103	12.4258	11.856
28.0394	19.9444	29.9405	13.5027
7.40199	9.01935	21.359	79.746
27.4578	27.9842	19.8542	8.42707
6.78298	28.4932	24.8264	7.11854
36.0294	20.6499	25.195	9.74655
24.9174	2.46933	13.315	75.2109
20.2397	3.40779	44.5199	14.4265
26.058	5.16144	22.608	26.1205
16.7498	0.649918	34.3101	22.2261
16.9188	2.37223	51.3483	24.9847
21.9409	19.6038	50.6262	28.5254
57.8453	2.98726	23.7397	56.0059
60.2277	34.0605	29.3141	1.07784
21.2387	14.8187	28.9055	17.2245
32.3434	24.7059	46.323	3.84489
31.5691	8.05935	7.56288	56.4642
20.8399	108.168	63.0468	23.4873
40.833	33.7539	44.2199	80.5787
3.13157	23.1695	63.5533	18.7242
9.21483	48.8585	20.6668	5.09415
32.1879	3.23725	44.5591	18.4969
35.995	2.81025	65.3333	1.31311
21.6336	28.2404	16.5214	18.2371
21.9236	31.6671	23.1117
58.5866	16.5746	3.67124
19.5256	2.97461	29.7636
34.4554	13.5245	3.37932
31.4784	10.1908	25.1962
32.9249	28.3429	42.8169
36.6733	145.135	46.241
21.2286	137.306	15.4655
31.3745	129.21	31.4217
7.61168	119.705	41.2104
20.2913	3.233	29.4651
76.12	136.314	3.86007
29.8171	2.97728	2.30296
37.0045	9.57522	1.43633
9.43745	4.46095	4.83615
46.4499	30.0987	4.65997
34.1218	26.4965	21.9036
3.0028	39.2788	22.3984
26.0013	57.1998	8.32114
21.8217	46.0297	0.952929
65.8077	105.423	1.53902
22.9803	74.4204	3.68468
18.0803	48.709	12.2944
23.9058	78.5368	34.4282
36.1879	83.6759	100.679
23.4398	47.098	29.9396
57.2716	51.3693	53.2805
27.9304	81.1034	43.2081
28.3063	46.8123	37.0734
26.7234	72.1098	34.6015
26.3185	64.6246	39.7579
24.2784	72.3015	12.7874
42.7435	2.903	13.4896
24.1188	43.5429	10.8125
23.6842	4.65233	21.9245
41.5162	11.7468	10.6976
22.0111	5.6973	11.9514
24.663	48.2191	9.5424
17.1413	41.5143	26.5419
3.90305	53.6273	25.7581
5.45137	24.02	15.02
5.07639	9.23145	6.20724
1.51355	37.6629	2.90283
53.9649	4.64512	11.4324
1.41378	28.9766	113.621
1.19215	47.4731	30.4659
1.16113	47.7716	11.856
13.3469	2.68661	13.5027
11.0271	35.1296	79.746
15.7809	34.4166	8.42707
10.109	39.0342	35.8007
16.9643	30.1553	7.11854
32.9008	41.9522	11.7991
31.5558	13.5768	9.74655
4.76566	33.6425	75.2109
51.5191	43.8389	14.4265
1.13752	56.6205	26.1205
57.0471	92.9235	22.2261
15.4423	55.8354	24.9847
29.0513	56.419	51.0701
29.1348	40.8591	14.7937
23.644	45.9942	35.6451
66.2851	33.6324	28.5254
24.3462	32.9101	56.0059
6.01265	23.9057	1.07784
81.5397	29.2872	17.2245
18.5259	54.5232	20.9649
18.7331	46.198	14.4619
0.493558	72.678	3.84489
1.63885	7.03108	15.1005
23.3327	4.56739	56.4642
14.7438	47.5421	23.4873
2.49285	5.30033	80.5787
7.7153	55.6773	6.13046
100.78	17.9572	18.7242
27.4704	50.0611	5.09415
20.3972	75.5242	18.4969
29.681	5.25487	1.31311
33.8115	71.8056	18.2371
26.0484	6.95146
7.1022	9.30031
10.552	9.55414
15.7718	96.3188
2.36831	80.4928
15.7172	87.037
17.5845	2.92587
19.7351	35.2197
28.7679	4.11588
29.7791	34.381
20.3056	14.8048
31.2799	74.4325
37.4949	101.234
33.5068	2.94513
19.5069	7.17487
20.4882	6.89086
10.0397	93.7196
22.5488	2.3959
28.1565	7.62433
30.1841	10.6325
26.1847	44.7183
28.316	1.21298
41.2151	1.92244
30.6645	99.0743
26.5701	9.5542
26.5889	20.0875
28.4431	20.6278
4.0403	40.0665
25.7921	33.7043
34.4429	6.3168
31.8164	11.6985
1.04367	13.9551
29.179	1.92922
18.6628	137.183
31.2654	125.206
27.8667	121.879
33.0614	121.873
36.3487	101.255
22.3601	0.735883
22.414	119.558
39.4718	1.63697
29.7818	1.89207
23.0237	8.4936
12.4801	21.3054
17.0326	22.2758
27.5435	17.0794
15.9136	15.6181
16.3122	34.4845
22.8491	32.4596
17.1446	9.4901
21.5531	10.5646
30.0455	120.344
23.2822	22.0217
19.7868	6.2014
24.8359	4.15596
91.1258	123.134
21.9235	128.759
2.53503	151.355
18.5078	23.3733
19.6619	102.672
15.3304	14.9607
11.4746	117.204
15.6057	3.51821
63.2075	171.937
0.351615	1.38126
23.6424	9.48568
20.7227	2.72205
24.012	11.6702
24.7101	5.98668
18.8041	7.37974
28.1007	2.45311
40.01	2.76728
42.6319	0.606407
33.8943	35.177
38.7358	45.5209
31.7227	35.7949
31.0196	66.8895
27.8514	15.9187
26.0541	20.043
24.9963	49.8339
24.9513	48.4249
20.8279	54.7568
19.353	66.439
17.2673	35.7646
22.2068	51.2593
27.3958	14.8519
54.152	33.2209
52.713	78.7884
34.756	33.1755
38.9815	41.6274
33.7185	91.1608
34.9643	22.2454
17.3697	14.2778
17.4293	2.78501
27.8154	81.1753
22.4971	126.459
15.4631	91.1225
25.804	33.4653
22.0307	40.5348
13.9688	106.177
26.1271	141.147
32.2371	50.6241
20.4735	103.316
31.1975	41.5954
35.8608	8.27563
23.9582	1.96281
24.976	26.3161
21.0965	113.746
13.5697	142.798
13.6948	107.112
17.9087	144.798
26.354	154.963
24.6166	33.9932
18.9821	39.4233
54.0157	19.2343
21.3505	1.42784
26.033	9.09383
28.756	5.26809
41.5336	26.5571
23.5593	7.69642
1.56373	5.46732
24.1644	12.0245
31.1334	2.73815
29.3007	9.76224
26.6407	27.0033
34.1835	17.0818
29.8856	3.75732
31.1169	16.153
84.9849	3.30359
28.5989	1.99608
25.6313	40.0282
25.2272	48.8648
60.9152	28.5584
19.5426	17.367
25.942	2.54742
23.8432	7.49383
16.1605	20.4974
8.20435	2.41077
89.4536	12.4258
21.4198	59.3796
34.8374	29.9405
33.1323	21.359
19.387	19.8542
35.0229	24.8264
17.6063	25.195
26.3297	13.315
27.7266	44.5199
22.1972	22.608
20.7476	78.3663
27.2047	34.3101
29.765	66.2949
27.1184	51.3483
32.7328	50.6262
34.7368	23.7397
29.0569	42.8175
30.8187	29.3141
27.723	28.9055
29.9378	46.323
36.3963	7.56288
28.9827	63.0468
32.3137	44.2199
22.8667	63.5533
27.1182	20.6668
26.7597	44.5591
21.824	65.3333
15.6553	56.6356
22.0915	16.5214
20.7634	23.1117
19.1233	3.67124
21.3985	105.315
20.1252	114.723
22.5867	79.9862
19.608	29.7636
56.6713	132.11
50.7633	3.37932
16.5221	83.5488
42.121	25.1962
39.6401	117.654
33.9562	73.9925
52.0927	42.8169
36.2839	2.65073
43.3508	110.532
32.133	128.675
1.83167	46.241
34.5175	15.4655
55.1806	107.88
12.7295	63.0993
35.7985	31.4217
1.95934	64.1218
44.2807	131.917
64.0869	103.75
2.77618	41.2104
56.1135	131.52
51.6175	85.0481
33.0773	97.6711
121.127	29.4651
163.265	91.6158
40.5147	113.027
39.4793	110.861
35.5134	3.86007
155.479	113.598
47.7317	130.462
2.36425	2.30296
43.8802	1.43633
6.99523	12.6689
47.1666	4.83615
52.8384	4.65997
88.7345	21.9036
38.7357	22.3984
40.5991	8.32114
31.6879	0.952929
120.603	1.53902
45.912	3.68468
110.461	11.1952
29.1164	6.38411
7.3526	5.74008
19.3119	12.2944
30.1637	0.957552
25.868	8.2554
40.2615	34.4282
29.1277	77.6168
162.455	64.3828
33.218	84.5433
54.6604	72.5864
115.929	100.679
51.7318	29.9396
149.033	160.119
22.4242	53.2805
22.869	52.9418
147.034	43.2081
58.2417	71.5378
58.9081	77.1537
27.8688	37.0734
34.5068	34.6015
30.0325	39.7579
29.5809	124.204
11.163	39.4268
53.8231	87.6853
106.263	12.7874
36.2274	41.5038
139.148	116.633
35.496	108.02
56.1846	108.452
0.804554	109.276
36.4058	13.4896
35.3213	10.8125
26.9416	21.9245
41.6934	51.8102
35.0433	24.1284
25.148	10.6976
3.35478	11.9514
53.4231	34.4459
34.7959	9.5424
33.9831	26.5419
35.8318	25.7581
36.4667	15.02
51.7288	88.4788
2.49279	112.951
45.7946	123.272
51.926	106.539
57.9303	6.20724
45.4934	110.773
27.8011	35.1374
36.9716	2.90283
45.1192	51.8195
38.5202	11.4324
54.9596	55.303
44.5436	32.3273
8.87399	113.621
53.0719	30.4659
70.9305	11.856
32.0371	13.5027
42.3584	79.746
1.03181	8.42707
34.0297	149.32
32.4539	35.8007
31.435	16.0818
31.214	161.897
27.8901	7.11854
35.2786	11.7991
21.3449	9.74655
40.7584	75.2109
23.5596	158.025
28.207	29.2458
32.1191	99.2143
32.7114	14.4265
29.1746	26.1205
35.1165	22.2261
26.622	21.7698
24.7175	24.9847
24.6152	51.0701
46.7627	104.182
0.676427	50.9761
0.108003	14.7937
10.595	98.0007
31.4586	4.57879
48.8036	101.725
40.8677	110.192
20.8961	35.6451
33.0472	150.864
61.1089	26.4081
45.9913	28.5254
53.5767	56.0059
51.2838	1.07784
67.5621	17.2245
29.3543	7.4256
29.945	20.9649
44.497	19.9088
17.9488	14.4619
42.7664	43.7434
34.0493	3.84489
32.5357	15.1005
41.7275	56.4642
25.7657	23.4873
28.9729	50.4677
58.5565	80.5787
41.8325	6.13046
57.142	18.7242
40.1789	98.1777
59.9675	5.09415
89.4962	18.4969
17.8071	107.186
29.2624	15.9845
123.614	23.1433
42.522	1.31311
23.7052	18.2371
45.7472	7.84391
35.3652
22.7494
21.7297
54.8779
23.2403
51.4807
50.628
2.16988
3.21062
25.257
44.0445
48.8759
1.01874
35.0991
33.5883
36.0652
30.3347
35.8506
36.8879
35.5976
26.2129
36.8312
58.9762
103.76
66.1094
53.7384
51.7721
63.7425
59.8098
61.6581
42.8987
45.239
74.634
115.885
57.5687
41.0005
44.7762
90.6301
38.3042
52.0849
40.2034
60.4434
55.9417
93.0402
43.4115
30.8062
57.0324
26.9961
50.2587
41.6643
21.2288
42.66
47.9058
34.3532
50.2117
48.1085
53.8958
45.2597
32.5737
43.8885
37.2343
34.4951
35.7591
51.897
54.8969
37.8527
53.9692
38.9763
39.7384
34.6332
34.3656
43.4894
40.9893
46.9402
45.4686
49.6353
60.6337
64.0601
58.8699
45.775
63.1243
59.9097
50.3081
86.0355
41.0077
39.7908
38.1219
25.4094
39.1145
74.611
22.3872
73.2298
93.762
32.6354
32.4548
26.002
37.7613
32.7619
30.0858
35.4446
32.8688
39.326
30.806
42.8112
23.123
27.5573
57.6688
81.7
29.0981
32.9962
24.1546
45.1078
39.6205
15.2139
55.3895
20.9461
48.683
16.0748
39.2258
27.2582
30.0126
26.0982
38.6159
70.635
52.3772
46.4629
49.564
21.0348
16.6583
33.5655
43.647
30.6069
37.7391
37.2016
24.9446
52.4472
57.1237
51.3622
20.4954
21.1486
34.1929
37.427
36.3131
43.1945
41.7064
20.1367
41.3236
58.1027
9.9461
13.9858
23.4066
39.4357
4.29187
65.8751
56.9233
41.0817
27.5358
44.8859
17.2294
64.0656
34.9891
1.5892
37.5733
23.6937
49.2468
39.6182
19.8966
72.6296
71.0533
76.2981
9.11854
67.4994
34.02
75.0757
63.9626
37.2544
32.7635
134.134
47.6424
29.2205
38.3394
44.7477
30.0674
2.18993
3.86999
25.9053
20.1855
6.47902
24.5726
62.8547
23.4176
74.8512
20.3683
29.9647
25.8437
0.283428
8.10537
15.8736
16.3817
27.2696
32.2656
42.4557
41.6797
33.4868
22.569
30.5455
42.6628
36.9812
2.3263
90.9793
22.4462
2.92751
41.0623
7.11236
41.8139
40.3295
45.2698
37.7619
9.59981
59.6561
44.9191
41.8504
49.0696
42.9995
47.098
54.0423
48.2481
62.84
33.7011
31.4116
13.9408
67.39
46.1433
67.9642
24.9019
34.1653
78.8626
61.5526
47.0211
54.74
21.0354
75.6063
28.8879
60.5147
38.6183
38.323
30.3756
35.8075
39.2961
120.822
41.2762
41.6269
25.2704
25.8431
1.23276
109.712
36.6308
48.2969
154.228
5.38094
140.003
134.867
30.5252
135.047
9.48239
31.7223
25.5097
41.5621
102.918
60.428
37.7617
33.4803
33.8581
47.9137
46.9294
24.2531
47.0419
44.1578
58.6683
18.9612
86.4989
49.2122
68.0689
54.9069
93.2551
6.14774
72.386
29.9861
63.8389
50.0379
5.8211
35.683
66.3009
29.6581
46.9815
46.4821
38.9493
30.9023
30.8213
21.0687
20.4933
44.8522
31.6669
59.5517
40.0855
3.53392
51.6295
1.43723
0.271576
36.1016
40.3739
46.1289
30.7616
7.39354
30.1106
35.6959
44.1627
41.0338
36.5568
31.7098
41.4495
0.114224
41.8248
22.6542
36.1834
0.320026
32.3395
41.57
40.7955
20.822
31.8834
37.3566
30.1455
32.3974
26.4737
28.1484
56.5172
48.761
29.8191
34.9592
25.8215
36.1498
33.7617
37.8208
53.3106
24.864
25.2709
22.3597
20.8715
17.1336
47.9726
23.4829
38.3232
23.5166
27.714
26.7314
39.4329
22.4023
38.6077
28.4267
42.8994
58.8035
40.7013
29.8793
57.6288
23.1913
2.18973
46.9744
49.4567
14.5758
6.03485
32.9215
44.2946
109.784
103.483
32.4031
30.0326
38.6534
61.3089
34.9127
46.3362
35.5037
31.549
40.5174
45.8942
40.4939
56.397
39.7231
23.7384
65.8558
35.9263
27.9217
40.1347
43.384
44.4884
35.5836
71.2736
51.746
58.7726
68.2947
61.3734
78.1289
45.0287
75.2896
77.9372
30.6189
48.6574
56.8016
58.4747
114.635
51.2287
97.269
64.7985
101.754
52.2186
103.278
107.593
41.3108
65.9713
112.962
118.477
125.605
58.1836
8.38443
25.3468
41.6242
31.2576
38.4107
28.2813
40.5442
53.4042
31.8282
22.0912
40.5732
27.5792
35.1923
31.3953
97.6074
51.7134
32.231
75.103
74.5948
34.3284
23.3272
19.9444
57.0367
75.0857
9.01935
51.1975
27.9842
63.0402
60.7196
28.4932
20.6499
46.8047
33.5241
37.7946
47.5432
2.46933
0.718746
56.3729
44.6423
3.40779
5.16144
0.649918
22.5903
2.37223
52.7962
31.4995
19.6038
55.4262
36.2953
36.1399
50.2546
39.2441
41.0691
34.4906
20.5293
46.225
27.1596
2.98726
42.2441
24.497
38.2702
34.0605
34.1284
43.3252
54.5526
40.3607
43.1431
50.8547
35.567
32.8673
14.8187
24.6991
37.0582
34.1952
30.1336
26.9126
39.2476
30.0687
27.7146
33.8549
23.3272
21.0866
46.4227
6.05922
41.5838
10.2647
11.5976
24.7059
43.5649
67.9566
44.149
52.6751
43.1018
8.05935
108.168
52.6379
48.9245
66.8944
33.7539
23.1695
44.8942
43.6884
48.8585
3.23725
40.7767
63.3419
2.81025
34.1476
64.6701
65.6395
37.3167
43.9529
28.2404
31.6671
16.5746
46.5618
35.7331
43.2264
2.97461
13.5245
41.3829
10.1908
36.8717
38.1844
38.8558
46.4141
57.281
33.1606
41.8256
160.091
48.4683
55.3644
45.0969
39.9733
44.7501
38.054
55.7674
41.6577
41.6475
42.4356
42.4216
31.6639
31.8508
2.69673
75.9255
39.9909
39.7584
34.6885
28.8516
62.8793
28.3429
48.8549
26.0993
109.418
145.135
137.306
48.6633
43.8068
94.7473
37.5911
38.38
129.21
29.5905
24.0928
26.9917
32.3489
44.9178
89.6004
72.2967
119.705
29.7088
28.2712
3.233
130.811
106.666
16.3155
136.314
25.9388
26.233
24.882
30.6635
53.4939
34.2212
37.3079
53.6867
45.0358
37.604
48.9335
33.8601
57.986
45.1513
29.5186
40.2872
47.0689
37.6731
33.1377
41.5364
58.9893
47.9332
45.6119
6.06035
32.1016
49.0181
47.9932
33.2695
28.034
53.6729
2.97728
48.3124
51.7191
43.5554
44.3817
12.8558
27.5355
56.8768
29.9297
9.57522
4.46095
31.0846
30.831
44.381
28.4234
42.0909
35.2319
46.1357
32.0151
41.9612
39.9066
56.9776
39.4346
35.8753
28.1455
33.0078
31.4328
42.3605
33.9526
31.2459
41.2889
34.1443
33.9799
30.264
34.2362
20.3549
28.5363
27.6562
42.3542
41.071
25.8238
25.2957
28.0973
18.8932
30.7473
39.1736
25.4538
31.2493
44.41
28.4916
32.9596
27.8381
32.2732
34.0803
38.1354
6.86347
39.2515
34.3542
41.445
37.9181
6.48785
38.5522
30.0987
22.3012
24.7553
24.4106
26.0304
26.4797
26.4965
39.2788
43.5324
57.1998
25.2687
46.0297
4.47752
40.007
49.7834
105.423
40.335
74.4204
48.709
38.9878
78.5368
83.6759
47.098
51.3693
38.6957
26.379
27.6262
27.8593
22.0143
26.011
81.1034
46.8123
42.4963
72.1098
36.1049
34.4324
64.6246
43.5415
34.242
25.2441
21.8164
31.128
23.2971
20.2458
17.7341
72.3015
61.6895
49.1574
44.8389
38.254
33.98
2.903
34.7366
50.7596
45.7921
66.3683
43.5429
38.4943
4.65233
11.7468
60.4715
62.0309
5.6973
25.411
28.6041
41.4256
17.015
17.8223
36.7297
47.1367
48.2191
41.5143
62.9045
53.6273
29.2134
21.3604
30.5429
24.02
35.5024
16.8908
9.23145
37.6629
37.3253
28.7782
42.4148
45.5169
51.9798
47.6902
51.4151
55.0271
41.0282
3.38813
4.64512
18.1691
2.28037
7.9478
39.1303
44.6944
38.9553
37.6071
41.0815
27.8765
13.2355
33.1042
21.2871
30.3666
32.1014
5.0822
25.6704
24.4677
21.1372
16.3773
9.21136
13.3616
31.8242
22.7489
16.2311
30.6095
23.6026
28.9766
47.4731
49.554
47.7716
23.959
45.6185
41.446
57.1899
55.6009
46.848
40.4266
38.7392
2.68661
19.6757
44.1914
35.1296
31.5721
49.0637
34.4166
39.0342
30.1553
41.9522
35.221
37.1655
13.5768
34.8777
19.7935
29.9972
41.2155
21.1347
48.5532
33.6425
43.8389
29.2779
56.6205
92.9235
55.8354
56.419
40.8591
34.0218
45.9942
25.5533
41.6431
33.6324
44.8958
24.0169
37.1055
32.9101
23.9057
29.2872
40.4011
26.6866
39.5543
54.5232
46.198
72.678
31.1844
34.86
7.03108
38.874
4.56739
18.4772
41.9681
39.4982
47.5421
42.8233
35.0602
46.7603
40.1571
5.30033
30.2784
55.6773
17.9572
50.0611
75.5242
51.8552
38.8132
5.25487
15.5734
33.3554
16.3416
51.3985
47.1122
42.1159
47.9762
25.6944
71.8056
24.1027
6.95146
21.712
9.30031
9.55414
96.3188
80.4928
63.4977
47.8463
31.8203
35.9429
87.037
37.8045
18.9512
37.3136
34.3463
25.884
44.2267
29.317
43.1041
30.1327
53.6919
2.92587
58.3729
35.6024
35.2197
38.8993
36.6738
4.11588
29.8955
29.2179
11.6446
35.7239
48.2681
60.3803
67.6806
26.5285
31.3383
34.381
41.1953
72.425
14.8048
27.1682
36.5314
74.4325
40.5854
101.234
31.6057
2.94513
35.8634
47.2971
38.6146
34.5732
7.17487
6.89086
93.7196
12.2555
48.8096
18.8123
54.7009
35.8287
2.3959
30.6576
34.1041
24.9038
7.62433
34.7573
34.1537
35.2433
45.7234
10.6325
38.3787
33.2533
33.9021
26.637
28.7778
26.741
26.359
30.9991
31.415
47.7893
37.9918
29.4696
44.7183
35.5903
25.8188
2.13789
1.21298
33.3555
27.0152
35.5005
27.8784
45.9097
33.5468
33.6662
32.2728
29.1745
35.587
40.4675
31.5651
35.5471
34.6373
38.4937
1.92244
27.3633
26.8341
15.2487
24.7419
19.7099
22.804
25.2846
24.0305
32.3447
23.6108
30.3244
10.3331
44.8212
64.5095
33.1213
99.0743
30.5411
73.448
44.2169
9.5542
34.1507
26.2219
49.3144
47.9397
54.7936
34.726
38.2199
20.0875
20.6278
28.0264
39.3906
40.0665
30.5411
33.7043
49.4829
67.3603
48.4297
6.3168
71.0863
11.6985
54.7936
54.3537
37.5717
39.0764
34.3576
43.3176
52.1167
43.8495
28.4113
56.3558
20.4008
21.7453
13.9551
47.4425
112.935
17.2683
29.0115
0.0736036
39.7549
37.5797
1.92922
25.3538
137.183
125.206
106.357
46.2411
121.879
21.7453
121.873
16.1357
19.5957
4.43778
101.255
0.735883
119.558
37.5797
41.607
24.8377
38.3344
24.5068
44.7696
55.5584
40.9262
45.8009
37.4107
33.8414
20.035
39.6619
25.8044
38.3954
25.1061
53.4362
1.63697
63.2794
38.1021
1.89207
47.2198
20.035
51.6344
49.7242
45.0531
66.3767
63.2794
46.8981
6.05182
31.9041
40.6044
48.1575
48.4292
30.451
34.0445
20.6408
20.035
21.706
27.7097
41.6257
47.5071
23.4617
33.7633
20.035
40.0704
0.868261
34.924
31.4095
36.0394
31.1818
23.2113
13.7973
42.887
23.2113
5.04318
54.5599
47.6193
54.4053
40.7884
8.4936
55.7346
21.3054
49.6502
22.2758
54.064
17.0794
15.6181
34.4845
32.4596
9.4901
74.259
65.9227
36.7796
85.1469
10.5646
44.5173
43.9268
48.154
120.344
53.5354
66.8338
36.9806
32.4885
38.5324
22.0217
46.3196
58.6792
65.8331
57.9579
44.0325
6.2014
58.9799
38.1681
4.15596
22.9011
123.134
64.2714
101.61
37.7821
128.759
66.4487
105.844
56.7861
98.3617
91.723
151.355
23.3733
54.3742
42.9491
100.717
102.672
14.9607
36.8819
55.7859
43.6665
51.4653
36.5883
33.8909
44.1926
117.204
53.9599
35.8328
48.5884
3.51821
8.11772
171.937
1.38126
40.3491
46.3452
9.48568
36.306
2.72205
11.6702
47.6124
49.6683
62.3137
42.4745
39.8953
39.3684
46.3368
53.5354
58.6752
35.1169
24.0742
5.98668
41.5444
53.3884
59.8069
65.0869
7.37974
59.3943
36.9942
2.45311
27.656
35.9633
2.76728
26.2725
27.2125
40.9028
53.8801
33.4279
0.606407
43.4684
46.4924
12.7379
2.74748
47.9081
13.6753
31.0219
50.6742
35.177
45.5209
35.7949
40.8729
66.8895
42.3982
56.5968
30.7148
46.0945
86.0842
15.9187
20.043
48.715
67.5253
38.1866
50.5043
40.4502
64.3372
49.8339
48.4249
54.7568
116.626
47.7944
74.3191
81.4468
66.439
39.966
35.7646
35.2382
51.2593
48.4682
14.8519
33.2209
19.9608
78.7884
42.2845
60.927
33.1755
[truncated: 918 more rows]
