# Supplementary material for: What is the true discharge rate and pattern of the striatal projection neurons in Parkinson’s disease and Dystonia?
Source: eLife. 2020 Aug 19;9:e57445. doi: 10.7554/eLife.57445 (PMC7462612; doi:10.7554/eLife.57445)
Supplement: Figure 2—source data 2. [file elife-57445-fig2-data2.xls]

## Sheet: Sheet1
DYST_FR_funct_IsoSC
27.594	19.3314	19.3314	19.3314	19.3314	21.4698	13.2604	5.70749	0.249188	0.249188
19.3314	44.2331	20.6867	20.6867	21.4698	11.7242	1.38138	10.4427	0.155559	0.155559
17.1986	37.1046	21.4698	21.4698	7.31598	29.1501	36.5722	15.7669	0.868953	0.868953
24.8573	20.6867	24.8939	7.31598	11.7242	18.2824	16.8388	0.77142	9.5373	1.8669
18.9619	21.4698	7.31598	11.7242	8.57438	13.2604	5.70749	0.249188	3.03341	64.9904
17.601	51.8776	11.7242	8.57438	29.1501	1.38138	25.7303	0.155559	1.84268	1.91343
20.6072	50.3547	8.57438	29.1501	18.2824	36.5722	10.4427	0.868953	3.21529	0.154523
14.5359	24.8939	29.1501	18.2824	13.2604	16.8388	15.7669	2.15661	7.27165	0.443057
15.1184	7.31598	18.2824	13.2604	24.343	9.85032	0.77142	9.5373	0.430741	1.14899
17.2305	6.81703	13.2604	24.343	19.7681	5.70749	0.249188	3.03341	2.18653	1.48275
16.02	24.1139	24.343	19.7681	1.38138	25.7303	0.155559	1.86435	1.8669	29.0842
44.2331	11.7242	19.7681	1.38138	36.5722	7.5692	0.868953	1.84268	1.957
37.1046	8.57438	1.38138	36.5722	16.8388	10.4427	9.95815	3.21529	1.50473
20.6867	29.1501	36.5722	23.3477	31.5704	15.7669	2.15661	7.27165	15.0143
29.2103	18.2824	23.3477	16.8388	9.85032	9.42053	9.5373	0.898282	4.41603
21.4698	13.2604	16.8388	26.5587	5.70749	0.77142	50.7247	0.430741	64.9904
47.1129	24.343	26.5587	22.285	25.7303	0.249188	3.03341	2.18653	3.10662
51.8776	19.7681	22.285	31.5704	7.5692	0.155559	5.57117	4.85225	3.02198
54.5528	1.38138	31.5704	9.85032	10.4427	0.868953	1.86435	10.6945	1.91343
50.3547	4.05874	9.85032	5.70749	9.43152	13.8959	0.697953	8.81399	26.6196
49.1258	36.5722	14.395	25.7303	15.7669	9.95815	20.2187	1.61613	21.08
24.8939	23.3477	5.70749	7.5692	2.70103	2.15661	1.84268	2.30923	0.154523
8.59371	16.8388	25.7303	10.4427	9.42053	9.5373	3.21529	2.57069	2.83537
7.31598	26.5587	7.5692	9.43152	0.77142	50.7247	7.27165	1.8669	5.49985
56.4758	22.285	10.4427	15.7669	0.249188	29.1045	1.53455	0.403004	3.16316
15.277	52.554	9.43152	2.70103	0.155559	3.03341	0.898282	3.62146	2.54415
21.054	53.3414	10.9258	9.42053	0.868953	5.57117	0.430741	7.1215	0.443057
16.0937	31.5704	7.47063	0.77142	13.8959	1.86435	4.3714	17.8135	1.14899
21.0679	9.85032	15.7669	0.249188	9.95815	0.697953	2.18653	1.957	11.1855
23.9132	14.395	2.70103	0.155559	2.15661	28.7216	3.26252	1.50473	1.48275
11.9559	5.70749	9.42053	0.868953	9.5373	20.2187	26.6381	17.3608	29.0842
12.1254	25.7303	0.77142	13.8959	50.7247	1.84268	4.85225	24.6358	3.21974
15.0863	7.5692	1.72818	9.95815	7.78997	3.21529	10.6945	19.5119
6.81703	10.4427	0.249188	2.15661	29.1045	7.27165	1.43269	15.0143
24.1139	9.43152	0.155559	9.5373	3.03341	0.213058	1.56896	48.8441
11.7242	33.2996	0.868953	50.7247	5.57117	1.53455	8.81399	4.41603
49.8129	34.1425	13.8959	7.78997	1.86435	0.898282	1.61613	1.48925
8.57438	53.5575	9.95815	28.8854	0.697953	0.430741	4.74614	3.26444
48.1426	41.1586	2.15661	29.1045	0.18018	0.417759	0.431573	0.246367
29.1501	46.3028	9.5373	3.03341	0.220131	24.3949	14.3617	64.9904
18.2824	47.8856	50.7247	5.57117	28.7216	4.3714	10.0348	17.8631
13.2604	14.6235	7.78997	1.86435	20.2187	2.18653	3.71448	14.15
24.343	10.9258	28.8854	0.697953	1.84268	3.26252	2.30923	3.10662
19.7681	7.47063	29.1045	5.14022	3.21529	37.7622	2.57069	3.02198
37.5522	15.7669	3.03341	0.18018	7.27165	26.6381	1.8669	1.91343
19.8077	10.8301	5.57117	0.220131	10.5026	4.85225	0.403004	26.6196
31.6098	2.70103	1.86435	51.2508	0.213058	72.467	3.62146	21.08
14.4122	9.42053	0.697953	34.9279	1.53455	3.38963	7.1215	0.255363
23.2273	30.5373	5.14022	28.7216	0.898282	10.6945	17.8135	0.154523
15.1376	0.77142	11.7623	20.2187	0.430741	5.61472	2.54641	2.83537
16.6676	1.72818	0.18018	1.84268	0.417759	21.3004	2.26627	18.7904
23.1418	0.249188	0.220131	3.21529	24.3949	1.43269	1.957	5.49985
17.5563	0.155559	51.2508	7.27165	4.3714	1.56896	1.50473	3.16316
1.38138	0.868953	34.9279	10.5026	2.18653	7.04803	17.3608	2.54415
4.05874	26.5804	28.7216	0.213058	27.3175	43.6502	24.6358	0.443057
18.5196	52.9083	20.2187	1.53455	3.52364	8.81399	19.5119	1.08631
18.8521	13.8959	1.84268	0.898282	3.26252	8.58678	9.64343	1.14899
27.2274	20.715	3.21529	0.430741	37.7622	1.61613	15.0143	11.1855
14.3007	45.9873	21.5581	0.417759	26.6381	4.74614	13.5613	1.48275
3.61823	9.95815	7.27165	30.2054	4.85225	0.431573	13.2375	8.35078
10.2807	78.5999	10.5026	24.3949	16.8124	14.3617	18.7547	23.6671
12.3491	52.0482	0.213058	4.3714	72.467	10.0348	48.8441	29.0842
9.60056	68.7705	1.53455	13.1629	3.38963	4.97388	4.41603	3.21974
11.3267	63.451	0.898282	2.18653	10.6945	3.71448	1.48925	0.984466
12.3173	2.15661	0.430741	27.3175	5.61472	60.7824	3.26444
12.942	9.5373	0.417759	3.52364	21.3004	5.69606	0.246367
15.6792	50.7247	30.2054	3.26252	1.43269	2.30923	64.9904
15.4332	28.2909	24.3949	37.7622	1.56896	2.57069	17.8631
18.1114	69.0583	4.3714	26.6381	7.04803	1.8669	1.0194
16.1584	7.78997	13.1629	4.85225	43.6502	0.403004	67.2666
13.486	28.8854	2.18653	16.8124	8.81399	3.62146	14.15
14.8494	29.1045	27.3175	72.467	8.58678	7.1215	3.10662
17.6323	3.03341	3.52364	3.38963	1.61613	28.634	3.02198
14.6336	5.57117	3.26252	10.6945	4.74614	17.8135	8.5482
22.5438	1.86435	17.7067	5.61472	6.12507	2.54641	1.91343
36.5722	0.697953	41.8427	21.163	0.431573	2.26627	26.6196
14.7308	5.14022	37.7622	21.3004	14.3617	1.957	21.08
19.7486	2.35279	26.6381	20.2474	10.0348	1.50473	1.33314
23.3477	11.7623	4.85225	1.43269	5.80118	17.3608	0.255363
27.525	0.18018	16.8124	1.56896	7.4064	24.6358	0.154523
20.6488	0.220131	13.3168	7.04803	4.97388	19.5119	2.83537
16.8388	51.2508	72.467	5.35435	3.71448	9.64343	18.7904
17.975	34.9279	3.38963	21.9069	60.7824	15.0143	5.49985
26.5587	28.7216	10.6945	43.6502	5.69606	13.5613	17.0597
22.285	20.2187	5.61472	8.81399	2.30923	40.6351	3.16316
24.0376	60.2558	22.2728	8.58678	2.57069	64.0471	3.35933
18.897	1.84268	21.163	1.61613	1.8669	13.2375	2.92314
14.4862	3.21529	21.3004	4.74614	0.403004	18.7547	2.54415
51.2858	19.296	20.2474	3.28803	3.62146	48.8441	0.443057
18.0009	21.5581	4.24948	6.12507	19.055	4.41603	1.08631
18.9041	7.27165	1.43269	2.0668	7.1215	1.48925	1.14899
56.9607	77.6963	1.56896	0.431573	29.0106	3.26444	14.2294
52.554	10.5026	7.04803	14.3617	28.634	0.246367	11.1855
53.3414	0.213058	5.35435	10.0348	17.8135	64.9904	1.48275
31.5704	4.96294	28.6968	5.80118	2.54641	17.8631	27.9617
9.85032	1.53455	37.907	5.79666	1.98001	1.0194	3.58507
15.3916	0.898282	49.2114	5.85591	2.26627	16.6204	3.93298
17.3341	0.430741	67.5975	7.4064	1.957	67.2666	8.35078
16.1957	0.417759	37.7735	4.97388	1.50473	8.46465	23.6671
12.7413	67.8182	21.9069	3.71448	17.3608	14.599	25.6032
20.2786	39.9527	43.6502	24.1635	24.6358	14.15	29.0842
41.2184	30.2054	8.81399	60.7824	19.5119	3.10662	3.21974
11.9799	24.3949	8.58678	5.69606	9.64343	3.02198	0.984466
16.4382	4.3714	1.61613	2.30923	15.0143	8.5482
42.2881	13.1629	19.11	2.57069	13.5613	1.91343
34.268	2.18653	4.74614	1.8669	30.3483	26.6196
16.7327	27.3175	3.28803	0.403004	55.2854	21.08
44.2735	76.6759	73.6399	2.5057	40.6351	6.08739
12.2165	67.8013	6.12507	3.62146	64.0471	0.368538
35.7148	17.2188	2.0668	21.6207	68.1779	1.33314
38.3261	23.8381	0.431573	19.055	5.20433	0.255363
15.7205	3.52364	13.4465	7.1215	13.2375	0.154523
16.0625	16.5554	14.3617	29.0106	18.7547	2.83537
15.4468	3.26252	10.0348	28.634	29.5813	18.7663
14.395	57.9927	5.80118	17.8135	39.774	3.24517
18.3786	25.6722	5.79666	2.54641	23.2601	18.7904
13.0709	17.7067	23.1408	1.98001	48.8441	5.79582
5.70749	41.8427	5.85591	18.3134	4.41603	5.49985
25.7303	37.7622	7.4064	4.51338	13.5605	2.05612
7.5692	61.1825	4.97388	2.26627	10.762	17.0597
15.2351	26.6381	3.71448	1.957	1.48925	0.452852
52.9227	67.3599	24.1635	1.50473	3.26444	5.74043
11.4338	4.85225	17.8175	2.80846	0.246367	3.16316
12.0392	59.0683	60.7824	17.3608	16.9845	3.35933
12.0823	16.8124	5.69606	0.663892	1.82852	2.92314
13.7505	13.3168	2.30923	24.6358	64.9904	2.54415
23.191	84.9066	2.57069	19.5119	17.8631	0.443057
16.5648	105.648	1.8669	61.8929	8.68715	1.08631
18.7212	72.467	0.403004	9.64343	1.0194	1.14899
23.2122	3.38963	2.5057	15.0143	16.6204	14.2294
15.4725	146.184	3.62146	13.5613	12.6223	11.1855
18.0329	10.6945	21.6207	30.3483	67.2666	1.48275
12.703	67.266	19.055	55.2854	13.3897	27.9617
12.6153	57.2938	7.1215	13.6087	8.46465	3.58507
18.1268	75.5963	29.0106	40.6351	14.599	3.93298
16.9597	5.61472	28.634	64.0471	14.15	8.35078
31.328	22.2728	17.8135	68.1779	3.10662	23.6671
11.4338	21.163	2.54641	22.9177	3.02198	25.6032
14.4944	21.3004	1.98001	5.20433	8.5482	8.3849
11.9963	43.8644	18.3134	13.2375	1.91343	3.46193
14.5074	114.285	4.51338	16.4687	37.4329	29.0842
15.3224	21.4041	2.26627	18.7547	26.6196	3.21974
12.7816	164.665	1.957	29.5813	21.08	0.984466
11.8631	51.1933	1.50473	39.774	6.08739
13.5255	20.2474	2.80846	23.2601	0.368538
11.6666	137.878	17.3608	29.0113	1.33314
10.4427	98.4974	0.663892	48.8441	0.255363
9.43152	4.24948	24.6358	15.253	0.154523
23.2008	1.43269	19.5119	4.41603	5.76304
20.9517	14.3107	61.8929	13.5605	2.83537
33.2996	149.319	9.64343	10.762	18.7663
35.3076	1.56896	15.0143	12.7697	3.24517
34.1425	97.7409	13.5613	15.3299	18.7904
53.5575	126.325	30.3483	1.48925	5.79582
25.7917	114.808	55.2854	29.7551	5.49985
33.8768	7.04803	48.2434	3.26444	2.05612
32.7318	19.5272	15.7076	0.246367	11.2595
27.6327	5.73057	62.4951	35.9988	17.0597
30.5405	5.35435	13.6087	16.9845	13.5686
38.8752	56.2277	40.6351	1.82852	0.452852
20.9805	33.1874	64.0471	64.9904	5.74043
32.565	28.6968	68.1779	17.8631	3.16316
41.1586	37.907	22.9177	8.68715	3.35933
46.3028	49.2114	44.072	1.0194	2.92314
47.8856	67.5975	5.20433	16.6204	2.54415
30.0992	37.7735	51.8792	12.6223	0.443057
32.9115	21.9069	13.2375	67.2666	1.08631
62.7222	22.5633	16.4687	13.3897	1.14899
14.6235	43.6502	33.7559	8.46465	14.2294
10.9258	8.81399	18.7547	14.599	11.1855
30.7282	8.58678	29.5813	2.00141	1.9319
7.47063	1.61613	39.774	14.15	0.336781
46.7694	106.846	23.2601	3.10662	1.48275
15.7669	19.11	29.0113	3.02198	27.9617
15.2137	4.74614	24.0296	8.5482	3.58507
30.3374	119.638	48.8441	1.91343	3.93298
23.5304	109.894	15.253	0.271142	8.35078
26.4162	111.24	12.3944	59.7587	23.6671
21.6521	3.28803	4.41603	37.4329	25.6032
10.8301	73.6399	27.644	26.6196	35.0775
30.77	6.12507	13.5605	21.08	8.3849
17.7627	161.241	10.762	6.08739	3.46193
2.70103	123.813	12.7697	0.368538	29.0842
9.42053	35.8992	13.8057	1.33314	3.21974
55.8181	161.176	61.7673	0.255363	0.984466
30.5373	118.291	15.3299	0.154523
24.0771	2.0668	1.48925	5.76304
22.4977	0.431573	29.7551	2.83537
25.322	9.14739	3.26444	18.7663
0.77142	127.271	0.246367	3.24517
28.1927	13.4465	31.4449	18.7904
22.6494	76.5571	35.9988	5.79582
34.3824	82.6601	14.1472	5.49985
28.2308	14.3617	16.9845	2.05612
13.3819	10.0348	15.6452	11.2595
28.8694	5.80118	8.24949	17.0597
27.3177	31.7569	5.8892	21.9803
1.72818	5.79666	1.82852	13.5686
24.7134	18.2903	64.9904	0.452852
37.6858	82.4865	17.8631	5.74043
37.5488	121.505	8.68715	6.55999
0.249188	18.5576	1.0194	3.16316
34.2919	23.1408	16.6204	3.35933
25.508	5.85591	12.6223	2.92314
15.186	7.4064	67.2666	16.704
18.7666	29.0059	38.0591	4.11396
14.6848	79.9714	13.3897	2.54415
18.7161	4.97388	8.46465	0.443057
18.7694	3.71448	14.599	1.08631
19.4239	24.1635	2.00141	1.14899
24.4081	17.8175	14.15	14.2294
26.9869	60.7824	3.10662	11.1855
16.4756	47.024	11.4285	10.8373
19.0999	5.69606	3.02198	1.9319
0.155559	77.6716	8.5482	0.336781
0.868953	2.30923	1.91343	1.48275
16.5863	34.5591	0.271142	27.9617
22.4657	104.811	59.7587	3.58507
23.3416	127.221	37.4329	59.2987
20.242	90.1181	26.6196	30.3077
26.8389	2.57069	25.4036	21.4431
26.5804	156.543	21.08	3.93298
63.703	136.011	6.08739	8.35078
52.9083	148.714	2.77437	23.6671
13.8959	1.8669	0.368538	25.6032
15.5993	117.986	1.33314	35.0775
48.9522	0.403004	15.2154	8.3849
25.1179	2.5057	6.31533	3.46193
42.7516	116.668	0.255363	29.0842
33.721	3.62146	0.154523	3.21974
34.1442	21.6207	27.4158	0.984466
20.715	19.055	5.76304
45.9873	7.1215	2.83537
28.4826	29.0106	18.7663
33.5857	28.634	3.24517
9.95815	17.8135	18.7904
78.5999	63.8306	5.79582
52.0482	103.79	5.49985
26.9787	95.7241	2.05612
68.7705	2.54641	2.52618
22.2936	95.1112	11.2595
63.451	1.98001	17.0597
31.425	18.3134	21.9803
41.3425	100.625	13.5686
25.8763	91.4773	0.452852
36.258	4.51338	5.74043
20.2432	104.49	6.55999
29.423	144.997	3.16316
13.677	3.73903	3.35933
27.2301	2.26627	2.92314
29.7559	1.957	16.704
2.15661	1.50473	4.11396
9.5373	18.6954	3.18165
63.021	2.80846	2.54415
21.9752	20.8179	0.443057
50.7247	17.2236	1.08631
25.6035	17.3608	1.14899
28.2909	0.663892	47.01
21.5172	24.6358	14.2294
20.1802	19.5119	11.1855
26.4857	61.8929	10.8373
51.8036	9.64343	1.9319
22.6081	15.0143	0.336781
16.6042	13.5613	1.48275
69.0583	30.3483	1.91745
7.78997	55.2854	27.9617
41.649	48.2434	3.58507
21.9594	15.7076	59.2987
28.8854	62.4951	53.6728
27.2174	75.3409	48.8557
29.1045	52.3821	30.3077
22.0093	13.6087	21.4431
3.03341	40.6351	84.309
25.0716	60.615	3.93298
33.7817	64.0471	8.35078
16.2786	68.1779	23.6671
24.0571	29.4041	25.6032
16.4124	22.9177	35.0775
28.3256	44.072	8.3849
25.5218	5.20433	93.5215
5.57117	44.867	3.46193
26.089	70.7742	29.0842
38.9263	80.5747	35.36
28.9037	51.8792	3.21974
30.991	13.2375	0.984466
1.86435	117.717
0.697953	55.7464
5.14022	16.4687
27.9252	33.7559
2.35279	110.273
11.7623	18.7547
25.5402	29.5813
44.3025	119.533
27.0525	127.868
36.2058	96.4984
15.4377	133.605
18.1904	39.774
18.2611	23.2601
20.072	29.0113
23.4235	24.0296
27.4326	48.8441
17.9574	15.253
20.9753	12.3944
25.4101	4.41603
22.9775	27.644
22.127	13.5605
25.5049	10.762
12.3093	12.7697
16.2183	13.8057
0.18018	51.8953
18.4068	61.7673
19.6486	11.3778
0.220131	15.3299
15.7637	67.4998
16.4125	1.48925
51.2508	29.7551
34.9279	3.26444
28.7216	0.246367
28.3544	31.4449
20.2187	35.9988
39.8501	14.1472
21.2306	16.9845
20.5423	15.6452
20.0925	8.24949
19.5912	5.8892
45.8583	1.82852
42.5079	64.9904
60.2546	17.8631
21.0784	8.68715
60.2558	1.0194
35.3814	16.6204
17.6369	12.6223
15.4067	67.2666
19.4443	38.0591
15.2376	13.3897
28.5087	71.6593
24.852	68.9997
17.4537	79.1836
21.0647	43.4379
26.1217	8.46465
16.5311	33.1206
20.8655	63.5904
19.2823	17.8887
15.4795	14.599
23.6915	69.6901
18.9515	55.9596
28.0068	65.7389
19.8833	2.00141
24.1508	55.7084
20.4417	14.15
22.5622	3.10662
27.9141	11.4285
33.493	0.188781
37.2852	24.4451
22.7754	3.02198
19.9491	8.5482
24.23	1.91343
34.1955	0.271142
21.6923	0.0772432
23.9209	59.7587
20.5267	37.4329
23.144	26.6196
0.166204	39.7259
24.2148	25.4036
23.8941	21.08
22.1229	6.08739
27.6329	2.77437
59.1555	66.6014
20.1678	0.368538
18.4648	1.33314
21.1724	15.2154
18.98	6.31533
19.4735	0.255363
1.84268	0.154523
29.3674	27.4158
23.9301	68.0914
52.8407	70.3424
28.0378	24.5247
3.21529	5.76304
20.5787	26.5346
18.8625	2.83537
19.296	18.7663
21.5813	3.24517
27.2367	18.7904
22.5669	5.79582
18.2918	36.4848
23.4744	5.49985
35.1492	2.05612
37.8179	98.8124
14.5644	2.52618
21.1037	11.2595
18.5067	17.0597
37.4985	66.0213
19.9957	45.9096
17.1041	21.9803
16.2775	13.5686
16.8052	68.1009
22.493	0.452852
22.5059	22.7359
16.9007	5.74043
22.9624	6.55999
20.386	60.8302
21.5581	3.16316
30.3287	3.35933
15.3428	14.7889
12.0918	80.8042
15.5878	2.92314
14.3084	69.2878
65.0035	16.704
29.6793	65.7223
23.9301	4.11396
7.27165	3.18165
29.8022	2.54415
77.6963	18.8545
23.8644	0.443057
21.1758	1.08631
10.5026	1.14899
17.6375	47.01
22.3395	50.7306
18.2491	14.2294
19.9288	11.1855
24.6481	10.8373
0.213058	27.5258
19.0872	1.9319
16.4211	115.444
16.3135	5.03949
0.647642	0.336781
13.2093	1.48275
18.5914	1.91745
17.5196	27.9617
4.96294	3.58507
26.4819	59.2987
23.5377	53.6728
21.563	48.8557
23.6867	30.3077
25.6349	21.4431
20.6296	112.751
22.1667	19.9412
20.5608	126.107
1.53455	98.0127
0.898282	95.3802
26.649	18.2659
18.7586	29.6939
27.9737	21.6751
19.0404	101.004
23.7893	84.309
17.2541	3.93298
1.52061	8.35078
16.4276	23.6671
17.0818	25.6032
18.1719	35.0775
16.2287	45.9864
19.2378	109.37
16.4813	102.741
19.5829	8.3849
19.2846	93.5215
14.4957	11.4037
23.324	3.46193
12.2385	29.0842
13.1127	52.0256
16.2322	48.0232
15.9917	35.36
15.2066	3.21974
17.6302	0.984466
0.430741
0.417759
18.6724
20.2723
21.2059
21.454
21.4621
21.2898
20.3936
23.2951
24.7677
23.568
29.9459
28.3334
37.3078
22.0658
67.8182
31.5424
39.9527
30.2054
24.077
27.4665
22.4523
21.7328
23.0342
28.2744
24.3949
4.3714
25.2845
32.4083
27.5967
26.9822
19.6835
20.2945
17.6646
18.3331
20.2935
19.7397
19.9918
40.0542
28.8697
13.1629
14.0857
2.18653
34.3522
27.3175
54.5532
27.7889
29.6513
19.6458
19.818
16.3784
39.9933
76.6759
67.8013
17.2188
28.6039
40.2411
35.0816
18.3296
15.6796
22.4906
18.2803
17.2919
15.6428
18.0099
29.2272
34.7375
24.6901
23.8381
18.9881
26.4847
22.3685
28.5331
19.9138
3.52364
16.5554
29.0002
37.1287
19.1672
31.8706
18.5379
16.5877
19.7889
18.3331
18.4012
13.6874
19.4317
20.4055
17.0731
20.7754
17.3572
21.9314
27.0146
3.26252
27.842
25.1478
22.6107
21.7941
57.9927
25.6722
17.7067
41.8427
37.7622
61.1825
28.3234
26.3976
28.2822
23.1754
20.6273
6.84232
26.6381
57.6656
67.3599
41.7602
53.7282
4.85225
28.8824
25.9675
25.8611
24.9013
23.404
25.4686
33.3545
21.6127
18.7376
21.5406
18.602
41.3562
48.3007
40.918
59.0683
53.715
16.8124
69.3737
62.8841
45.7364
34.3202
53.2089
44.1184
13.3168
30.0411
84.9066
105.648
47.8894
72.467
51.1658
52.5987
3.38963
44.8181
146.184
10.6945
37.9053
55.5389
55.8631
67.266
52.2297
50.3169
57.2938
42.2977
75.5963
59.0683
64.2918
5.61472
63.0115
34.8088
22.2728
21.163
21.3004
61.8703
51.9915
28.4596
62.7787
46.4335
45.4165
43.8644
33.0028
53.1048
40.4836
14.3107
39.3736
114.285
21.4041
69.1725
65.0366
29.8833
63.6499
35.9032
164.665
33.7963
51.1933
72.0002
44.2565
89.6262
20.2474
48.9084
137.878
36.2243
98.4974
4.24948
44.8751
49.9019
1.43269
34.6812
48.0189
58.709
55.4425
29.022
14.3107
40.0521
149.319
1.56896
21.0395
97.7409
126.325
114.808
7.04803
43.3348
17.5529
54.493
52.705
32.7578
40.0449
43.0908
48.5604
33.8811
44.6846
49.7168
47.3623
19.5272
5.73057
36.0166
5.35435
50.3558
27.8222
42.3589
56.2277
43.6928
45.7425
54.45
50.2288
52.8313
78.1403
46.699
52.7939
33.1874
26.1546
44.6846
43.6142
28.6968
37.4525
37.907
49.8656
18.5754
51.8437
28.1013
1.59794
42.1039
37.3849
27.9736
35.1147
14.4523
34.843
27.6649
37.949
38.7177
22.2843
47.8824
37.2985
39.7185
41.6977
42.3838
22.1249
21.51
26.3269
13.5627
39.8312
13.1221
38.1719
34.93
54.1293
53.3313
49.2114
45.5669
58.4416
47.4533
67.5975
37.7735
21.9069
44.7172
74.2236
34.833
61.625
43.7219
50.7346
22.5633
35.9189
43.6502
8.81399
48.1871
39.4557
62.5686
34.2131
52.3512
56.3485
8.58678
32.0668
50.1108
52.3504
58.4318
49.7971
50.3697
43.5254
45.8483
1.61613
73.159
55.8923
39.2731
106.846
19.11
4.74614
49.4744
45.1851
119.638
54.5743
51.571
41.0702
74.1683
109.894
111.24
3.28803
59.7686
39.1512
67.6208
39.8065
50.6688
113.321
29.6383
73.6399
82.6312
6.12507
40.6423
54.154
38.0516
44.7518
52.8355
161.241
26.4192
37.728
39.5536
56.691
50.0452
41.6389
30.1803
37.9078
123.813
46.1641
47.8235
29.4908
35.8992
161.176
118.291
27.4438
34.5393
48.746
59.0211
48.5452
2.0668
64.7084
73.0908
41.886
51.8686
45.7262
41.9441
33.3169
44.6461
43.8067
57.7364
23.5319
49.5366
57.7537
24.4091
46.0759
46.7276
45.489
26.5529
50.7055
47.2209
50.1177
61.7823
38.8028
0.431573
45.7608
15.7361
46.0823
49.5015
38.8026
48.071
39.2951
35.0521
38.2238
24.6138
36.9897
21.1954
9.14739
34.5975
33.2522
37.2237
34.2454
34.3999
35.403
23.1611
29.5839
33.7019
14.2958
42.1503
60.5889
36.9329
127.271
75.2443
43.2194
13.4465
59.1135
35.5578
23.0389
41.0584
28.4243
51.3159
60.4984
38.1138
59.9606
76.5571
82.6601
51.4685
14.3617
10.0348
5.80118
49.5897
54.7899
44.6279
22.3091
17.5114
38.1346
54.9396
75.3539
31.7569
5.79666
18.2903
45.3379
82.4865
121.505
87.6745
52.8957
52.086
33.8624
25.9146
30.7084
46.0931
44.4705
18.5576
41.9169
65.341
23.1408
53.0368
5.85591
54.3038
50.236
46.259
34.2523
28.4243
7.4064
24.7615
5.75994
29.0059
30.4044
6.53498
5.49239
5.41809
79.9714
60.3987
44.5108
51.6556
4.97388
51.9204
35.4314
56.9773
3.71448
106.429
24.1635
17.8175
52.5725
53.1843
52.2197
33.5332
44.088
60.7824
47.024
49.631
39.4944
42.1413
102.567
49.6571
48.4962
5.69606
67.8996
3.47212
67.3652
41.4532
39.6167
32.3459
77.6716
2.30923
75.0187
45.7863
35.4255
44.2738
36.6693
49.3169
34.5591
54.9417
45.1987
42.8791
104.811
16.7326
43.0031
30.6452
127.221
90.1181
2.57069
54.7957
57.082
57.306
28.1052
36.3377
80.2269
87.3913
45.1567
32.3411
36.3327
53.3231
51.589
156.543
38.0472
136.011
37.1699
36.5992
38.141
31.7547
148.714
77.7643
40.292
41.581
38.3367
39.8055
55.1637
63.3583
57.2981
1.8669
51.3212
52.4125
5.72727
43.9248
117.986
36.6176
55.8246
47.4724
26.4164
45.2315
40.1316
0.403004
2.5057
23.2336
56.2902
44.2351
60.0625
45.1422
30.3085
25.3362
49.4492
29.3956
24.0877
34.6187
47.2832
37.9276
42.6518
42.3236
36.8792
25.8133
40.0628
35.6659
31.663
40.8969
36.308
26.222
34.964
34.7974
29.6855
37.9961
27.1803
42.5169
42.5969
53.4156
43.0795
116.668
3.62146
21.6207
46.1495
40.595
83.4348
19.055
7.1215
47.6837
70.5939
29.0106
59.3968
28.634
17.8135
42.7443
53.2032
63.8306
37.2235
31.2097
33.3375
46.3236
58.5026
32.5884
32.2614
57.4853
44.3039
103.79
95.7241
28.9439
2.54641
53.545
54.268
56.0936
47.4473
61.0273
36.5006
95.6219
95.1112
1.98001
50.6373
18.3134
100.625
91.4773
76.1585
4.51338
104.49
50.5224
51.1054
144.997
32.0212
41.0614
3.73903
26.4799
2.26627
19.171
41.6715
55.5318
1.957
33.5023
60.6876
27.3617
1.50473
33.5515
114.676
62.0311
31.2342
52.2021
41.0175
18.6954
47.0648
45.5403
2.80846
12.6642
42.2406
59.3089
20.8179
40.7476
23.5109
57.955
6.13019
17.2236
34.1844
51.3717
62.6161
31.5673
23.7618
58.4225
47.777
31.0855
64.1338
49.5648
56.5143
35.9181
27.509
33.5274
42.1134
45.4459
17.3608
26.6967
35.6527
41.797
23.1936
29.591
25.3304
36.4254
45.4365
24.134
0.663892
31.2584
39.9114
36.5404
35.5485
34.8852
49.7472
37.2343
55.1464
45.4784
39.3562
36.5925
35.8317
36.1984
40.6853
46.8924
38.0234
24.6358
38.5336
48.5965
36.0264
19.5119
44.1697
39.5304
36.8879
57.1143
37.3734
38.0903
36.3422
28.3473
120.172
96.6245
61.8929
48.3213
35.009
44.7009
28.0472
52.027
45.4892
39.9536
44.6859
53.7236
46.6175
52.8677
33.7199
43.2429
29.3011
54.6257
47.5316
41.1809
41.1524
40.2453
44.8965
36.0651
34.6432
41.4139
44.6151
26.0297
28.3204
30.3161
35.1327
44.0827
44.1743
117.747
33.0643
47.8963
30.9911
114.281
40.2072
40.7542
40.0579
72.2487
27.2725
37.0444
20.3516
32.6351
9.64343
15.0143
69.1361
47.8683
37.7331
42.6646
26.8359
41.3723
47.105
32.6638
36.0486
47.997
31.6999
46.3816
35.7373
59.6392
34.3531
58.8076
48.738
27.8507
32.2812
47.2761
44.5581
25.5424
43.6929
22.1899
41.9008
30.9338
37.5179
40.7231
25.1381
24.2213
31.593
34.3073
51.1174
12.828
32.7485
22.0293
39.4815
25.6563
35.1268
9.69126
23.8213
13.5613
35.3349
35.4126
43.1494
29.8176
48.0797
59.0366
48.3649
46.8452
36.6408
34.0307
40.0179
40.4927
48.1077
8.89138
61.0728
44.6363
45.7037
27.3528
15.0314
29.6795
36.7642
42.5124
29.1734
32.2294
37.8574
27.4601
32.7472
29.0767
24.7361
28.5334
34.7297
34.1454
24.2422
18.1711
31.2058
33.6739
26.8359
42.0549
31.2619
36.9483
42.2704
32.6322
35.4899
31.524
24.042
29.817
35.8814
41.3614
26.1664
27.9705
22.8347
50.4085
43.1819
34.1831
30.3483
34.049
40.3093
39.607
38.2365
38.3225
49.3125
42.7955
49.0067
46.6913
37.8031
40.5775
102.307
37.3702
32.9627
60.0956
55.2854
40.5587
34.7373
48.2434
15.7076
62.4951
75.3409
52.3821
13.6087
40.6351
60.615
64.0471
68.1779
29.4041
22.9177
44.072
5.20433
44.867
70.7742
80.5747
51.8792
37.2561
25.2034
25.0355
115.803
35.1115
44.442
44.1014
29.6587
27.0781
61.5849
40.7509
35.4272
42.4612
35.7433
36.1864
25.046
35.2625
62.2504
97.0764
38.8143
31.1716
13.2375
117.717
55.7464
16.4687
33.7559
110.273
18.7547
29.5813
40.1689
40.5115
119.533
127.868
96.4984
133.605
39.774
23.2601
29.0113
55.7044
41.3897
12.4757
33.5211
25.7903
39.8007
38.6238
35.4014
34.8803
57.5127
39.8344
47.145
47.0126
47.7385
36.7556
38.7616
27.8157
47.8849
21.1516
33.357
62.3634
29.1222
24.0296
50.3032
18.9565
28.5733
29.614
31.3545
26.7562
26.8237
20.5763
38.2128
34.4416
35.5539
35.2919
27.1331
30.9915
25.7308
20.9344
8.21426
29.9501
48.8441
15.253
17.9645
14.5853
18.5066
20.7194
40.0231
19.6519
12.3944
19.1165
4.41603
13.7966
27.644
13.5605
42.2468
29.7532
10.762
12.7697
13.8057
18.5723
51.8953
61.7673
15.8817
11.3778
16.0435
18.8625
15.3299
13.7483
12.9229
13.8942
50.8486
15.6917
42.9767
67.4998
16.4293
35.2193
53.2814
21.1709
40.0022
18.9892
13.0178
14.6459
13.8023
21.5012
19.8945
1.48925
17.775
11.1245
11.0507
23.1871
29.7551
12.868
13.9724
11.0147
13.7801
5.66105
17.9191
6.94712
16.4687
3.26444
0.246367
19.4083
7.92166
20.9415
18.8498
31.4449
19.8402
35.9988
29.446
16.1112
22.1183
31.6877
14.1472
17.7158
16.9845
15.6452
58.0452
15.6131
22.622
19.758
59.427
41.2566
12.3184
11.0471
8.24949
29.6752
17.0589
46.9513
25.163
14.9604
12.1263
28.3522
50.9708
8.67819
49.33
47.4337
13.3368
24.7013
13.1173
2.78168
18.4777
18.9242
20.8305
14.5557
5.8892
12.1985
5.62658
12.2727
16.094
21.7904
21.1517
22.8976
1.82852
11.3353
16.9561
16.9168
10.6711
16.9456
13.6254
14.593
17.7719
13.7754
12.7676
64.9904
35.5908
34.7097
27.0266
20.6443
23.3123
19.3798
17.8631
22.8549
8.68715
46.6115
25.6448
27.6299
1.0194
16.6204
12.6223
38.4825
67.2666
38.0591
24.9411
13.3897
22.9115
71.6593
68.9997
44.5149
33.6061
33.2255
33.3273
79.1836
43.4379
33.7241
8.46465
33.1206
38.3517
44.176
24.8732
17.5081
26.7007
18.7241
63.5904
21.5435
69.0328
17.8887
14.599
24.5684
69.6901
55.9596
65.7389
2.00141
55.7084
59.3697
15.8381
71.0664
20.2679
14.15
3.10662
11.4285
20.6827
0.188781
24.4451
3.02198
8.5482
49.6851
75.8647
26.8393
22.226
27.514
25.7547
15.5863
33.4849
1.91343
32.3396
28.4665
0.271142
25.2551
32.7317
18.123
27.2256
32.9849
17.6717
16.9391
17.7594
0.0772432
18.9429
20.7316
17.4887
28.3801
4.66876
24.0639
59.7587
37.4329
21.6644
19.2029
34.9391
17.0381
37.3544
37.2438
25.6509
26.6196
39.7259
22.4897
25.7356
30.5089
29.727
20.4678
41.1134
28.0201
25.4036
24.8763
21.08
39.6269
46.1373
20.2201
16.4515
34.6573
17.8901
6.08739
2.77437
21.3436
66.6014
56.2019
28.352
20.9897
30.9456
29.3331
27.0113
44.4898
22.5287
49.1807
0.368538
63.8197
14.5949
1.33314
15.2154
16.6509
29.0535
31.5269
26.7326
20.7311
24.5613
29.0739
30.9088
6.31533
0.255363
14.7845
30.7729
18.1677
16.1962
15.9539
0.154523
17.4802
16.8798
26.5548
17.0373
29.0224
21.699
16.8155
27.4158
24.7272
27.786
38.3491
28.9676
40.8981
68.0914
70.3424
69.4759
60.1426
28.2989
24.5247
5.76304
26.5346
2.83537
18.7663
3.24517
18.7904
18.8201
21.5244
42.4757
31.8948
25.3465
17.0343
33.9215
5.79582
24.8462
38.1878
23.3144
26.2654
19.7927
16.3991
21.2791
21.954
36.4848
23.3362
19.4925
5.49985
45.5741
17.4402
23.041
2.05612
35.3402
18.1814
16.5939
98.8124
29.2298
2.52618
11.2595
19.0066
29.6848
23.2651
24.6503
22.4906
10.3409
17.0597
66.0213
28.7017
45.9096
21.9803
34.6767
13.5686
68.1009
16.1852
40.4791
14.1837
0.452852
23.6261
13.7979
22.7359
13.6316
5.74043
14.6287
6.55999
60.8302
15.4369
14.9398
56.886
3.16316
15.0167
19.9365
3.35933
14.7889
80.8042
2.92314
16.4217
21.0895
10.3199
25.5893
12.9971
23.698
69.2878
34.1127
16.704
65.7223
23.3665
32.8778
4.11396
24.91
18.4764
16.194
22.9587
19.4249
23.389
30.5236
13.9321
22.0228
3.18165
2.63025
42.2119
2.54415
2.14885
27.577
38.1632
18.8545
0.443057
1.08631
16.4335
15.5965
1.14899
34.9361
28.8905
31.6328
15.9145
23.669
32.7865
2.81635
11.3097
14.2056
16.7185
25.0217
14.4942
16.3075
14.6444
19.7575
19.5736
33.7785
21.5915
25.6973
19.5535
18.9377
15.8225
25.1342
19.2707
13.5341
21.211
18.4117
18.8019
15.7582
17.4565
28.6966
16.3876
22.2618
39.7678
34.2433
44.1837
29.4919
47.01
50.7306
31.003
40.1279
37.6426
40.9379
14.2294
42.7182
11.1855
36.4307
38.4299
34.6483
27.5415
10.8373
42.273
28.5591
38.5119
39.9312
41.0914
27.5258
92.8477
79.9852
32.5532
35.4162
24.0186
1.9319
90.7062
41.977
76.1647
32.7961
45.1046
40.6195
30.4671
115.444
32.8301
41.9629
23.4421
42.9493
44.5405
38.9294
19.3432
42.2482
32.7985
41.2139
46.2893
34.5711
40.7896
25.2988
21.2866
5.03949
0.336781
32.1282
1.48275
33.8457
27.4499
47.1936
27.809
35.5911
24.0105
29.4541
38.4604
31.2726
1.91745
37.4781
29.9735
27.9617
49.5569
3.58507
59.2987
33.2295
38.4673
42.9084
54.3958
18.9292
33.1435
45.8102
37.29
53.6728
48.8557
30.3077
21.4431
42.8911
47.3036
36.9389
49.6648
43.5375
49.7923
31.2815
50.2566
50.0567
42.6332
36.6872
44.0908
48.508
22.9882
35.5578
38.4312
55.6627
[truncated: 321 more rows]
