# Supplementary material for: What is the true discharge rate and pattern of the striatal projection neurons in Parkinson’s disease and Dystonia?
Source: eLife. 2020 Aug 19;9:e57445. doi: 10.7554/eLife.57445 (PMC7462612; doi:10.7554/eLife.57445)
Supplement: Figure 3—source data 1. [file elife-57445-fig3-data1.xls]

## Sheet: Sheet1
PD_info_AllUnits
Folder	Filename	Unit id	Iso.Sc	FR	CV ISI	BetaPowerMUA	BetaPowerSTA_LFP
database_2009_03_16_Traj1_R.mat	E1_07255.xls	1	0.0350912	24.1854	0.975974	0.000453348
database_2009_03_16_Traj1_R.mat	E1_07442.xls	1	0.0453858	28.6779	0.944341	0.00022009
database_2009_03_16_Traj1_R.mat	E1_07542.xls	1	0.0523434	33.7685	0.910401	0.000300119
database_2009_03_16_Traj1_R.mat	E1_07641.xls	1	0.0479138	25.8096	0.969664	0.000158004
database_2009_03_16_Traj1_R.mat	E1_07741.xls	1	0.0585086	22.86	0.974972	0.000141483
database_2009_03_16_Traj1_R.mat	E1_07933.xls	1	0.856092	2.15319	3.98159	0.000389204
database_2009_03_16_Traj1_R.mat	E1_08109.xls	1	0.657202	7.02634	2.33113	0.000413354
database_2009_03_16_Traj1_R.mat	E1_08257.xls	1	0.163484	57.7316	1.20627	0.0021521
database_2009_03_16_Traj1_R.mat	E1_08448.xls	1	0.103988	16.9419	0.94118	0.000225723
database_2009_03_16_Traj1_R.mat	E1_08620.xls	1	0.0209204	23.8023	1.09836	0.00473837
database_2009_03_16_Traj1_R.mat	E1_08796.xls	1	0.066679	23.3854	1.03615	0.000265267
database_2009_03_16_Traj1_R.mat	E1_08973.xls	1	0.0273203	26.7912	0.98358	0.00012474
database_2009_03_16_Traj1_R.mat	E1_09173.xls	1	0.06477	20.7509	0.963549	0.000205761
database_2009_03_16_Traj1_R.mat	E1_09365.xls	1	0.0412811	23.5427	1.10395	0.00011448
database_2009_03_16_Traj1_R.mat	E1_09514.xls	1	0.305338	28.0381	1.42485	0.000307401
database_2009_03_16_Traj1_R.mat	E1_09660.xls	1	0.118031	53.7399	1.02675	0.00115318
database_2009_03_16_Traj1_R.mat	E1_09851.xls	1	0.0389386	20.4981	0.943191	0.000101719
database_2009_03_16_Traj1_R.mat	E1_10028.xls	1	0.526553	18.9877	3.92897	0.000153394
database_2009_03_16_Traj1_R.mat	E1_10220.xls	1	0.0341101	23.364	0.891563	0.000114742
database_2009_03_16_Traj1_R.mat	E1_10398.xls	1	0.321274	26.0209	1.74417	0.00042592
database_2009_03_16_Traj1_R.mat	E1_10766.xls	1	0.0215563	18.9866	1.00733	0.000105215
database_2009_03_16_Traj1_R.mat	E1_11021.xls	1	0.069581	25.6148	1.00103	0.000160241
database_2009_03_16_Traj1_R.mat	E1_11350.xls	1	0.124917	50.5916	1.03115	0.000865426
database_2009_03_16_Traj1_R.mat	E1_11663.xls	1	0.478924	7.57322	4.74308	0.000247255
database_2009_03_16_Traj1_R.mat	E1_12030.xls	1	0.314828	6.92177	3.39953	0.00016698
database_2009_03_16_Traj1_R.mat	E1_12366.xls	1	0.0912274	34.7712	0.975887	0.000243109
database_2009_03_16_Traj1_R.mat	E1_12694.xls	1	0.102302	32.3001	1.07645	0.0004083
database_2009_03_16_Traj1_R.mat	E1_13018.xls	1	0.0829723	20.826	0.97501	0.000156863
database_2009_03_16_Traj1_R.mat	E1_13347.xls	1	0.0467527	25.6012	1.07326	8.71719e-05
database_2009_03_16_Traj1_R.mat	E1_13671.xls	1	0.0901505	24.4227	1.03102	9.06177e-05
database_2009_03_16_Traj1_R.mat	E1_13999.xls	1	0.0749035	21.7436	1.00665	0.000115054
database_2009_03_16_Traj1_R.mat	E1_14361.xls	1	0.0324797	22.7317	1.02036	9.34378e-05
database_2009_03_16_Traj1_R.mat	E1_14749.xls	1	0.714506	42.5312	0.717765	0.00052381
database_2009_03_16_Traj1_R.mat	E1_15000.xls	1	0.461601	32.2347	1.03516	0.000184863
database_2009_03_16_Traj1_R.mat	E2_07933.xls	1	0.848139	17.7638	1.05961	0.000370846
database_2009_03_16_Traj1_R.mat	E2_08109.xls	1	0.045891	30.7763	0.974486	0.000335427
database_2009_03_16_Traj1_R.mat	E2_08257.xls	1	0.0509771	26.6535	0.951365	0.000115713
database_2009_03_16_Traj1_R.mat	E2_08448.xls	1	0.0264569	19.084	0.903484	0.000112664
database_2009_03_16_Traj1_R.mat	E2_08620.xls	1	0.0379269	24.5577	0.917538	0.000159562
database_2009_03_16_Traj1_R.mat	E2_08796.xls	1	0.0568251	26.3567	0.944467	0.00013017
database_2009_03_16_Traj1_R.mat	E2_08973.xls	1	0.0470171	23.7045	0.922513	0.000165711
database_2009_03_16_Traj1_R.mat	E2_09173.xls	1	0.0755328	27.0215	0.97608	0.000156616
database_2009_03_16_Traj1_R.mat	E2_09365.xls	1	0.0394066	27.0621	0.909414	0.000262981
database_2009_03_16_Traj1_R.mat	E2_09514.xls	1	0.0413392	27.5944	0.925128	0.00015801
database_2009_03_16_Traj1_R.mat	E2_09660.xls	1	0.0832644	24.2691	0.937334	0.000332061
database_2009_03_16_Traj1_R.mat	E2_09851.xls	1	0.911547	1.04909	2.56506	0.000670338
database_2009_03_16_Traj1_R.mat	E2_10028.xls	1	0.0327721	25.1673	0.971505	0.00013094
database_2009_03_16_Traj1_R.mat	E2_10220.xls	1	0.0683188	21.2945	0.969919	0.000234307
database_2009_03_16_Traj1_R.mat	E2_10398.xls	1	0.0107395	2.23492	2.33661	0.000498382
database_2009_03_16_Traj1_R.mat	E2_10766.xls	1	0.501828	33.5898	1.73969	0.000400533
database_2009_03_16_Traj1_R.mat	E2_11021.xls	1	0.57412	2.26512	0.58707	0.00022469
database_2009_03_16_Traj1_R.mat	E2_11350.xls	1	0.159593	75.5469	0.886818	0.00904945
database_2009_03_16_Traj1_R.mat	E2_11663.xls	1	0.0398288	19.1608	0.99535	0.000198016
database_2009_03_16_Traj1_R.mat	E2_12030.xls	1	0.0670492	34.4435	0.945005	0.000205292
database_2009_03_16_Traj1_R.mat	E2_12366.xls	1	0.0701091	35.0512	0.967172	0.000167177
database_2009_03_16_Traj1_R.mat	E2_12694.xls	1	0.0438926	29.1224	0.958703	0.000175346
database_2009_03_16_Traj1_R.mat	E2_13018.xls	1	0.17529	7.37877	1.27957	0.00128774
database_2009_03_16_Traj1_R.mat	E2_13347.xls	1	0.0484155	23.2859	1.01986	0.000119944
database_2009_03_16_Traj1_R.mat	E2_13671.xls	1	0.746748	5.06548	4.49652	0.000211033
database_2009_03_16_Traj1_R.mat	E2_13999.xls	1	0.0548309	45.2722	0.967912	0.000257809
database_2009_03_16_Traj1_R.mat	E2_14361.xls	1	0.027176	27.5779	0.975887	0.000175468
database_2009_03_16_Traj1_R.mat	E2_14749.xls	1	0.0304335	22.3537	1.10209	0.000331669
database_2009_03_16_Traj1_R.mat	E2_15000.xls	1	0.0351638	28.387	0.963543	0.000143395
database_2009_03_16_Traj1_R.mat	E1_07255.xls	2	0.128149	21.5911	1.03373	0.000453348
database_2009_03_16_Traj1_R.mat	E1_07442.xls	2	0.0401821	27.9506	0.9654	0.00022009
database_2009_03_16_Traj1_R.mat	E1_07542.xls	2	0.087754	27.2579	0.982134	0.000300119
database_2009_03_16_Traj1_R.mat	E1_07641.xls	2	0.0407675	15.0775	1.00806	0.000158004
database_2009_03_16_Traj1_R.mat	E1_07741.xls	2	0.2119	11.5014	1.25309	0.000141483
database_2009_03_16_Traj1_R.mat	E1_07933.xls	2	0.0875959	64.3143	0.873391	0.000389204
database_2009_03_16_Traj1_R.mat	E1_08109.xls	2	0.110854	60.4265	0.864792	0.000413354
database_2009_03_16_Traj1_R.mat	E1_08448.xls	2	0.0187298	16.532	1.04075	0.000225723
database_2009_03_16_Traj1_R.mat	E1_08620.xls	2	0.683912	6.81905	3.59454	0.00473837
database_2009_03_16_Traj1_R.mat	E1_08796.xls	2	0.354449	6.6488	1.23556	0.000265267
database_2009_03_16_Traj1_R.mat	E1_08973.xls	2	0.0472369	21.2593	0.98933	0.00012474
database_2009_03_16_Traj1_R.mat	E1_09173.xls	2	0.0356603	25.4688	1.0242	0.000205761
database_2009_03_16_Traj1_R.mat	E1_09365.xls	2	0.0750982	28.4768	0.923385	0.00011448
database_2009_03_16_Traj1_R.mat	E1_09514.xls	2	0.28784	22.6479	1.10513	0.000307401
database_2009_03_16_Traj1_R.mat	E1_09660.xls	2	0.872772	13.1312	2.70676	0.00115318
database_2009_03_16_Traj1_R.mat	E1_09851.xls	2	0.0596464	16.6547	0.979393	0.000101719
database_2009_03_16_Traj1_R.mat	E1_10028.xls	2	0.0974609	63.9142	0.920368	0.000153394
database_2009_03_16_Traj1_R.mat	E1_10220.xls	2	0.0825735	24.3375	0.982584	0.000114742
database_2009_03_16_Traj1_R.mat	E1_10398.xls	2	0.0645439	50.2248	0.953122	0.00042592
database_2009_03_16_Traj1_R.mat	E1_10766.xls	2	0.0602803	16.1938	0.921735	0.000105215
database_2009_03_16_Traj1_R.mat	E1_11021.xls	2	0.0461846	22.4928	0.960435	0.000160241
database_2009_03_16_Traj1_R.mat	E1_11663.xls	2	0.0921178	58.2232	0.97387	0.000247255
database_2009_03_16_Traj1_R.mat	E1_12030.xls	2	0.101898	61.9639	0.883656	0.00016698
database_2009_03_16_Traj1_R.mat	E1_12366.xls	2	0.656162	2.71309	1.33186	0.000243109
database_2009_03_16_Traj1_R.mat	E1_12694.xls	2	0.49438	4.20001	1.17056	0.0004083
database_2009_03_16_Traj1_R.mat	E1_13018.xls	2	0.0524935	20.0295	1.04129	0.000156863
database_2009_03_16_Traj1_R.mat	E1_13347.xls	2	0.0381721	24.2781	0.984921	8.71719e-05
database_2009_03_16_Traj1_R.mat	E1_13671.xls	2	0.0474849	27.1137	0.976603	9.06177e-05
database_2009_03_16_Traj1_R.mat	E1_13999.xls	2	0.0257158	19.1974	0.966145	0.000115054
database_2009_03_16_Traj1_R.mat	E1_14361.xls	2	0.0548111	15.8377	0.969119	9.34378e-05
database_2009_03_16_Traj1_R.mat	E1_14749.xls	2	0.0673358	51.8006	0.912958	0.00052381
database_2009_03_16_Traj1_R.mat	E1_15000.xls	2	0.0863311	61.2474	0.897602	0.000184863
database_2009_03_16_Traj1_R.mat	E2_07933.xls	2	0.099928	65.7243	0.897776	0.000370846
database_2009_03_16_Traj1_R.mat	E2_08109.xls	2	0.0393526	29.3703	1.00712	0.000335427
database_2009_03_16_Traj1_R.mat	E2_08257.xls	2	0.0518279	22.9757	0.974862	0.000115713
database_2009_03_16_Traj1_R.mat	E2_08448.xls	2	0.0489594	25.4453	0.959656	0.000112664
database_2009_03_16_Traj1_R.mat	E2_08620.xls	2	0.0623915	26.4914	1.03946	0.000159562
database_2009_03_16_Traj1_R.mat	E2_08796.xls	2	0.0402765	24.867	0.96734	0.00013017
database_2009_03_16_Traj1_R.mat	E2_08973.xls	2	0.159122	15.7601	0.94184	0.000165711
database_2009_03_16_Traj1_R.mat	E2_09173.xls	2	0.0519716	15.7659	0.981559	0.000156616
database_2009_03_16_Traj1_R.mat	E2_09365.xls	2	0.0416319	21.706	0.911249	0.000262981
database_2009_03_16_Traj1_R.mat	E2_09514.xls	2	0.0457943	17.6713	0.965576	0.00015801
database_2009_03_16_Traj1_R.mat	E2_09660.xls	2	0.775455	2.39653	0.667397	0.000332061
database_2009_03_16_Traj1_R.mat	E2_09851.xls	2	0.51834	2.21475	1.99576	0.000670338
database_2009_03_16_Traj1_R.mat	E2_10028.xls	2	0.0384709	24.0333	0.927469	0.00013094
database_2009_03_16_Traj1_R.mat	E2_10220.xls	2	0.0174678	16.3804	1.02629	0.000234307
database_2009_03_16_Traj1_R.mat	E2_10398.xls	2	0.0895085	72.6513	0.870671	0.000498382
database_2009_03_16_Traj1_R.mat	E2_10766.xls	2	0.0926266	65.8076	0.963513	0.000400533
database_2009_03_16_Traj1_R.mat	E2_11021.xls	2	0.111204	79.0669	0.887315	0.00022469
database_2009_03_16_Traj1_R.mat	E2_11663.xls	2	0.0697592	24.5012	0.997388	0.000198016
database_2009_03_16_Traj1_R.mat	E2_12030.xls	2	0.464951	10.8594	1.56754	0.000205292
database_2009_03_16_Traj1_R.mat	E2_12366.xls	2	0.0469245	30.1864	1.08771	0.000167177
database_2009_03_16_Traj1_R.mat	E2_12694.xls	2	0.0385789	13.3332	0.957986	0.000175346
database_2009_03_16_Traj1_R.mat	E2_13018.xls	2	0.0836834	58.5617	0.929708	0.00128774
database_2009_03_16_Traj1_R.mat	E2_13347.xls	2	0.0359523	15.9429	1.08	0.000119944
database_2009_03_16_Traj1_R.mat	E2_13671.xls	2	0.0873026	83.1281	0.840452	0.000211033
database_2009_03_16_Traj1_R.mat	E2_13999.xls	2	0.265149	22.009	0.770381	0.000257809
database_2009_03_16_Traj1_R.mat	E2_14361.xls	2	0.0380388	25.5282	0.973203	0.000175468
database_2009_03_16_Traj1_R.mat	E2_14749.xls	2	0.0227372	22.3245	0.968984	0.000331669
database_2009_03_16_Traj1_R.mat	E2_15000.xls	2	0.0588734	22.5678	0.931172	0.000143395
database_2009_03_16_Traj1_R.mat	E1_07255.xls	3	0.747712	5.37715	4.25948	0.000453348
database_2009_03_16_Traj1_R.mat	E1_07442.xls	3	0.0166141	18.1488	1.00334	0.00022009
database_2009_03_16_Traj1_R.mat	E1_07542.xls	3	0.0448159	23.8066	1.16208	0.000300119
database_2009_03_16_Traj1_R.mat	E1_07641.xls	3	0.0173543	24.2056	0.979844	0.000158004
database_2009_03_16_Traj1_R.mat	E1_07741.xls	3	0.043777	25.6679	0.973234	0.000141483
database_2009_03_16_Traj1_R.mat	E1_08448.xls	3	0.636604	0.546513	1.54615	0.000225723
database_2009_03_16_Traj1_R.mat	E1_08620.xls	3	0.0905552	17.7553	1.0386	0.00473837
database_2009_03_16_Traj1_R.mat	E1_08796.xls	3	0.0238983	18.972	0.975995	0.000265267
database_2009_03_16_Traj1_R.mat	E1_08973.xls	3	0.0517546	26.6948	0.90975	0.00012474
database_2009_03_16_Traj1_R.mat	E1_09173.xls	3	0.76759	3.71836	2.68538	0.000205761
database_2009_03_16_Traj1_R.mat	E1_09365.xls	3	0.0329577	21.851	1.0263	0.00011448
database_2009_03_16_Traj1_R.mat	E1_09514.xls	3	0.0744555	37.9579	0.992105	0.000307401
database_2009_03_16_Traj1_R.mat	E1_09851.xls	3	0.0470554	20.731	0.961657	0.000101719
database_2009_03_16_Traj1_R.mat	E1_10220.xls	3	0.0432878	22.0365	0.971353	0.000114742
database_2009_03_16_Traj1_R.mat	E1_10766.xls	3	0.0490056	16.1938	0.964748	0.000105215
database_2009_03_16_Traj1_R.mat	E1_11021.xls	3	0.0231592	23.2733	1.08147	0.000160241
database_2009_03_16_Traj1_R.mat	E1_12366.xls	3	0.0444302	29.844	0.993215	0.000243109
database_2009_03_16_Traj1_R.mat	E1_12694.xls	3	0.0398141	30.6501	0.973365	0.0004083
database_2009_03_16_Traj1_R.mat	E1_13018.xls	3	0.0633914	15.4379	1.05877	0.000156863
database_2009_03_16_Traj1_R.mat	E1_13347.xls	3	0.0469733	27.5858	1.03203	8.71719e-05
database_2009_03_16_Traj1_R.mat	E1_13671.xls	3	0.0467691	25.6212	0.961259	9.06177e-05
database_2009_03_16_Traj1_R.mat	E1_13999.xls	3	0.527116	2.50577	2.25898	0.000115054
database_2009_03_16_Traj1_R.mat	E1_14361.xls	3	0.0253046	23.5702	1.01714	9.34378e-05
database_2009_03_16_Traj1_R.mat	E2_08109.xls	3	0.0253367	25.0741	1.05341	0.000335427
database_2009_03_16_Traj1_R.mat	E2_08257.xls	3	0.0484534	25.2485	1.04514	0.000115713
database_2009_03_16_Traj1_R.mat	E2_08448.xls	3	0.054541	23.1881	0.952056	0.000112664
database_2009_03_16_Traj1_R.mat	E2_08620.xls	3	0.0352455	13.9225	1.0642	0.000159562
database_2009_03_16_Traj1_R.mat	E2_08796.xls	3	0.165839	13.9805	1.4401	0.00013017
database_2009_03_16_Traj1_R.mat	E2_08973.xls	3	0.0294207	27.1138	1.04454	0.000165711
database_2009_03_16_Traj1_R.mat	E2_09173.xls	3	0.0292119	25.2653	1.07162	0.000156616
database_2009_03_16_Traj1_R.mat	E2_09365.xls	3	0.683261	5.35604	1.27604	0.000262981
database_2009_03_16_Traj1_R.mat	E2_09514.xls	3	0.0189473	22.7461	1.03237	0.00015801
database_2009_03_16_Traj1_R.mat	E2_09660.xls	3	0.0380859	30.4461	0.947996	0.000332061
database_2009_03_16_Traj1_R.mat	E2_09851.xls	3	0.113888	78.6819	0.848861	0.000670338
database_2009_03_16_Traj1_R.mat	E2_10028.xls	3	0.0526469	17.961	0.939026	0.00013094
database_2009_03_16_Traj1_R.mat	E2_10220.xls	3	0.535513	0.929699	2.42425	0.000234307
database_2009_03_16_Traj1_R.mat	E2_11663.xls	3	0.397946	8.38284	1.77277	0.000198016
database_2009_03_16_Traj1_R.mat	E2_12030.xls	3	0.0384502	23.8907	1.02626	0.000205292
database_2009_03_16_Traj1_R.mat	E2_12366.xls	3	0.0361942	27.3487	1.037	0.000167177
database_2009_03_16_Traj1_R.mat	E2_12694.xls	3	0.0246856	23.6588	0.891945	0.000175346
database_2009_03_16_Traj1_R.mat	E2_13347.xls	3	0.0309718	25.3367	0.968031	0.000119944
database_2009_03_16_Traj1_R.mat	E2_13999.xls	3	0.0580126	38.718	0.968517	0.000257809
database_2009_03_16_Traj1_R.mat	E2_14361.xls	3	0.0312893	28.9755	0.994969	0.000175468
database_2009_03_16_Traj1_R.mat	E2_14749.xls	3	0.0423402	28.2455	0.926738	0.000331669
database_2009_03_16_Traj1_R.mat	E2_15000.xls	3	0.0194409	27.0112	0.960831	0.000143395
database_2009_03_16_Traj1_R.mat	E1_07255.xls	4	0.0301269	21.9331	0.998964	0.000453348
database_2009_03_16_Traj1_R.mat	E1_07641.xls	4	0.0276099	14.5233	1.07217	0.000158004
database_2009_03_16_Traj1_R.mat	E1_07741.xls	4	0.0255396	21.0991	0.983015	0.000141483
database_2009_03_16_Traj1_R.mat	E1_08448.xls	4	0.052633	12.2282	1.0725	0.000225723
database_2009_03_16_Traj1_R.mat	E1_08620.xls	4	0.0293015	19.4922	1.0017	0.00473837
database_2009_03_16_Traj1_R.mat	E1_08796.xls	4	0.0401308	21.5513	0.978659	0.000265267
database_2009_03_16_Traj1_R.mat	E1_09173.xls	4	0.0629276	29.3071	0.962595	0.000205761
database_2009_03_16_Traj1_R.mat	E1_09851.xls	4	0.0219402	16.1306	1.01471	0.000101719
database_2009_03_16_Traj1_R.mat	E1_10766.xls	4	0.0433479	15.0913	1.09799	0.000105215
database_2009_03_16_Traj1_R.mat	E1_13018.xls	4	0.00855136	15.5317	1.01735	0.000156863
database_2009_03_16_Traj1_R.mat	E1_13999.xls	4	0.0128305	13.1351	1.12844	0.000115054
database_2009_03_16_Traj1_R.mat	E1_14361.xls	4	0.0177797	15.7445	1.08191	9.34378e-05
database_2009_03_16_Traj1_R.mat	E2_08109.xls	4	0.566766	0.468675	1.25013	0.000335427
database_2009_03_16_Traj1_R.mat	E2_08257.xls	4	0.0308451	19.0913	0.958903	0.000115713
database_2009_03_16_Traj1_R.mat	E2_08448.xls	4	0.0263252	26.4713	0.929248	0.000112664
database_2009_03_16_Traj1_R.mat	E2_08620.xls	4	0.0478388	21.7861	0.937813	0.000159562
database_2009_03_16_Traj1_R.mat	E2_08796.xls	4	0.0264053	18.3924	0.921247	0.00013017
database_2009_03_16_Traj1_R.mat	E2_08973.xls	4	0.0183283	18.7192	1.0294	0.000165711
database_2009_03_16_Traj1_R.mat	E2_09173.xls	4	0.0328961	19.877	0.936166	0.000156616
database_2009_03_16_Traj1_R.mat	E2_09365.xls	4	0.0244466	12.2625	1.07129	0.000262981
database_2009_03_16_Traj1_R.mat	E2_09514.xls	4	0.0145262	17.7619	1.00862	0.00015801
database_2009_03_16_Traj1_R.mat	E2_09660.xls	4	0.0387633	25.788	1.00635	0.000332061
database_2009_03_16_Traj1_R.mat	E2_10028.xls	4	0.0225303	16.7904	0.981912	0.00013094
database_2009_03_16_Traj1_R.mat	E2_10220.xls	4	0.0805827	15.5393	0.914815	0.000234307
database_2009_03_16_Traj1_R.mat	E2_11663.xls	4	0.0232107	19.9699	0.94874	0.000198016
database_2009_03_16_Traj1_R.mat	E2_12030.xls	4	0.0240967	21.1822	1.04622	0.000205292
database_2009_03_16_Traj1_R.mat	E2_12694.xls	4	0.0171496	17.6439	1.06911	0.000175346
database_2009_03_16_Traj1_R.mat	E2_13347.xls	4	0.019159	17.9275	1.03175	0.000119944
database_2009_03_16_Traj1_R.mat	E2_14361.xls	4	0.00582221	12.2983	1.05518	0.000175468
database_2009_03_16_Traj1_R.mat	E2_14749.xls	4	0.0406808	17.5146	1.02873	0.000331669
database_2009_03_16_Traj1_R.mat	E2_15000.xls	4	0.0150415	13.5828	1.03253	0.000143395
database_2009_03_16_Traj1_R.mat	E1_08448.xls	5	0.0240023	20.9041	1.00758	0.000225723
database_2009_03_16_Traj1_R.mat	E1_13999.xls	5	0.0248937	20.5312	1.01085	0.000115054
database_2009_03_16_Traj1_R.mat	E2_09365.xls	5	0.0382237	25.9345	0.912051	0.000262981
database_2009_03_16_Traj1_R.mat	E2_10220.xls	5	0.0429533	23.8623	0.949175	0.000234307
database_2009_03_16_Traj1_R.mat	E2_11663.xls	5	0.0265901	14.6295	1.07794	0.000198016
database_2009_03_16_Traj1_R.mat	E2_14749.xls	5	0.0817302	3.72806	2.83758	0.000331669
database_2009_03_16_Traj2_L_updatedGPeBorder.mat	E2_10036.xls	1	0.0391533	25.0568	0.879662	0.000364947
database_2009_03_16_Traj2_L_updatedGPeBorder.mat	E2_10228.xls	1	0.565206	19.2378	2.55061	0.000182951
database_2009_03_16_Traj2_L_updatedGPeBorder.mat	E2_10403.xls	1	0.405452	24.7942	1.93506	0.001667
database_2009_03_16_Traj2_L_updatedGPeBorder.mat	E2_10658.xls	1	0.0861833	42.0023	0.880794	0.000233984
database_2009_03_16_Traj2_L_updatedGPeBorder.mat	E2_11027.xls	1	0.0656232	24.1188	0.968688	0.000182824
database_2009_03_16_Traj2_L_updatedGPeBorder.mat	E2_11396.xls	1	0.124993	74.3205	0.924503	0.000315051
database_2009_03_16_Traj2_L_updatedGPeBorder.mat	E2_11721.xls	1	0.0369869	27.4474	0.967455	0.00390267
database_2009_03_16_Traj2_L_updatedGPeBorder.mat	E2_12121.xls	1	0.0553411	26.7454	0.859669	0.000108821
database_2009_03_16_Traj2_L_updatedGPeBorder.mat	E2_12509.xls	1	0.103519	20.1007	1.09247	0.000302472
database_2009_03_16_Traj2_L_updatedGPeBorder.mat	E2_12895.xls	1	0.0588188	30.6092	1.01226	0.000225363
database_2009_03_16_Traj2_L_updatedGPeBorder.mat	E2_13283.xls	1	0.422451	20.8604	2.06641	0.00093476
database_2009_03_16_Traj2_L_updatedGPeBorder.mat	E2_13653.xls	1	0.112982	66.4082	0.941122	0.000665739
database_2009_03_16_Traj2_L_updatedGPeBorder.mat	E2_14040.xls	1	0.111666	37.1951	1.03306	0.00100687
database_2009_03_16_Traj2_L_updatedGPeBorder.mat	E2_14378.xls	1	0.0264986	22.8856	1.00925	0.000176741
database_2009_03_16_Traj2_L_updatedGPeBorder.mat	E2_14747.xls	1	0.723216	7.41129	1.53619	0.000229169
database_2009_03_16_Traj2_L_updatedGPeBorder.mat	E2_15000.xls	1	0.0394534	24.5702	0.975584	9.92982e-05
database_2009_03_16_Traj2_L_updatedGPeBorder.mat	E2_10036.xls	2	0.0206332	17.7357	1.14017	0.000364947
database_2009_03_16_Traj2_L_updatedGPeBorder.mat	E2_10228.xls	2	0.108158	81.0318	0.837546	0.000182951
database_2009_03_16_Traj2_L_updatedGPeBorder.mat	E2_10403.xls	2	0.0836144	64.7296	0.956964	0.001667
database_2009_03_16_Traj2_L_updatedGPeBorder.mat	E2_10658.xls	2	0.662819	11.6866	1.85445	0.000233984
database_2009_03_16_Traj2_L_updatedGPeBorder.mat	E2_11027.xls	2	0.0305486	26.8691	0.935951	0.000182824
database_2009_03_16_Traj2_L_updatedGPeBorder.mat	E2_11396.xls	2	0.36943	21.0679	2.9364	0.000315051
database_2009_03_16_Traj2_L_updatedGPeBorder.mat	E2_11721.xls	2	0.148863	19.0342	1.12812	0.00390267
database_2009_03_16_Traj2_L_updatedGPeBorder.mat	E2_12121.xls	2	0.0394578	23.3259	1.00199	0.000108821
database_2009_03_16_Traj2_L_updatedGPeBorder.mat	E2_12509.xls	2	0.807067	1.56339	1.58855	0.000302472
database_2009_03_16_Traj2_L_updatedGPeBorder.mat	E2_12895.xls	2	0.053325	20.5951	1.04182	0.000225363
database_2009_03_16_Traj2_L_updatedGPeBorder.mat	E2_13283.xls	2	0.0748519	60.7472	0.855009	0.00093476
database_2009_03_16_Traj2_L_updatedGPeBorder.mat	E2_13653.xls	2	0.689865	33.935	1.14917	0.000665739
database_2009_03_16_Traj2_L_updatedGPeBorder.mat	E2_14040.xls	2	0.626512	26.5486	1.50668	0.00100687
database_2009_03_16_Traj2_L_updatedGPeBorder.mat	E2_14378.xls	2	0.0503611	22.0886	0.866231	0.000176741
database_2009_03_16_Traj2_L_updatedGPeBorder.mat	E2_14747.xls	2	0.119413	82.1686	0.820558	0.000229169
database_2009_03_16_Traj2_L_updatedGPeBorder.mat	E2_15000.xls	2	0.0558633	23.3914	0.923232	9.92982e-05
database_2009_03_16_Traj2_L_updatedGPeBorder.mat	E2_10036.xls	3	0.0621292	21.8603	0.930858	0.000364947
database_2009_03_16_Traj2_L_updatedGPeBorder.mat	E2_10658.xls	3	0.0437678	32.977	0.960289	0.000233984
database_2009_03_16_Traj2_L_updatedGPeBorder.mat	E2_11027.xls	3	0.0250043	24.3303	0.910377	0.000182824
database_2009_03_16_Traj2_L_updatedGPeBorder.mat	E2_11721.xls	3	0.0683159	30.6098	0.949264	0.00390267
database_2009_03_16_Traj2_L_updatedGPeBorder.mat	E2_12121.xls	3	0.0747151	28.5773	1.00798	0.000108821
database_2009_03_16_Traj2_L_updatedGPeBorder.mat	E2_12509.xls	3	0.0413002	32.4292	0.90239	0.000302472
database_2009_03_16_Traj2_L_updatedGPeBorder.mat	E2_12895.xls	3	0.0251737	21.9177	0.965878	0.000225363
database_2009_03_16_Traj2_L_updatedGPeBorder.mat	E2_13283.xls	3	0.793322	1.37541	1.33869	0.00093476
database_2009_03_16_Traj2_L_updatedGPeBorder.mat	E2_14040.xls	3	0.678467	13.2573	1.01909	0.00100687
database_2009_03_16_Traj2_L_updatedGPeBorder.mat	E2_14378.xls	3	0.129305	6.26224	2.48822	0.000176741
database_2009_03_16_Traj2_L_updatedGPeBorder.mat	E2_15000.xls	3	0.0292876	24.9754	0.963281	9.92982e-05
database_2009_03_16_Traj2_L_updatedGPeBorder.mat	E2_10036.xls	4	0.0325548	24.335	0.871513	0.000364947
database_2009_03_16_Traj2_L_updatedGPeBorder.mat	E2_12509.xls	4	0.0521312	38.5934	1.04286	0.000302472
database_2009_03_16_Traj2_L_updatedGPeBorder.mat	E2_12895.xls	4	0.0393065	29.6645	0.997469	0.000225363
database_2009_03_16_Traj2_L_updatedGPeBorder.mat	E2_14378.xls	4	0.0632273	17.762	0.912589	0.000176741
database_2009_03_16_Traj2_L_updatedGPeBorder.mat	E2_15000.xls	4	0.0281085	24.1282	1.00075	9.92982e-05
database_2009_03_16_Traj2_L_updatedGPeBorder.mat	E2_14378.xls	5	0.0171262	15.371	1.04923	0.000176741
database_2013_01_08_Traj1_R.mat	E2_11615.xls	1	0.187021	46.3385	0.908915	0.000200861
database_2013_01_08_Traj1_R.mat	E2_11770.xls	1	0.422197	67.1659	0.851369	0.000270819
database_2013_01_08_Traj1_R.mat	E2_11926.xls	1	0.0465536	28.3235	1.01502	0.000148196
database_2013_01_08_Traj1_R.mat	E2_12092.xls	1	0.200433	55.945	0.88742	0.000124589
database_2013_01_08_Traj1_R.mat	E2_12479.xls	1	0.0375541	25.0813	0.937917	0.00758584
database_2013_01_08_Traj1_R.mat	E2_12846.xls	1	0.038396	39.6746	0.935969	0.00010645
database_2013_01_08_Traj1_R.mat	E2_13214.xls	1	0.0619911	34.0257	0.94282	0.000238408
database_2013_01_08_Traj1_R.mat	E2_13582.xls	1	0.0269297	27.4141	0.893091	9.75763e-05
database_2013_01_08_Traj1_R.mat	E2_13911.xls	1	0.0394501	19.8645	0.892904	0.000149091
database_2013_01_08_Traj1_R.mat	E2_14239.xls	1	0.103	57.893	0.897124	0.000230269
database_2013_01_08_Traj1_R.mat	E2_14503.xls	1	0.0380899	26.5926	0.987839	0.000602407
database_2013_01_08_Traj1_R.mat	E2_14756.xls	1	0.0765301	23.9481	1.11825	0.000224772
database_2013_01_08_Traj1_R.mat	E2_15000.xls	1	0.0418839	32.7918	0.934549	0.000164592
database_2013_01_08_Traj1_R.mat	E2_11615.xls	2	0.115632	56.039	0.96664	0.000200861
database_2013_01_08_Traj1_R.mat	E2_11770.xls	2	0.0700092	52.2528	0.912114	0.000270819
database_2013_01_08_Traj1_R.mat	E2_11926.xls	2	0.0521166	24.1751	0.966312	0.000148196
database_2013_01_08_Traj1_R.mat	E2_12092.xls	2	0.0494044	44.0187	0.958517	0.000124589
database_2013_01_08_Traj1_R.mat	E2_12479.xls	2	0.0247809	16.557	1.0239	0.00758584
database_2013_01_08_Traj1_R.mat	E2_12846.xls	2	0.0149923	22.157	1.188	0.00010645
database_2013_01_08_Traj1_R.mat	E2_13214.xls	2	0.0577928	32.7379	0.980298	0.000238408
database_2013_01_08_Traj1_R.mat	E2_13582.xls	2	0.0325666	22.313	0.984218	9.75763e-05
database_2013_01_08_Traj1_R.mat	E2_13911.xls	2	0.0575284	27.9463	0.926009	0.000149091
database_2013_01_08_Traj1_R.mat	E2_14239.xls	2	0.0297212	39.0375	1.00605	0.000230269
database_2013_01_08_Traj1_R.mat	E2_14503.xls	2	0.0690372	28.414	1.03928	0.000602407
database_2013_01_08_Traj1_R.mat	E2_14756.xls	2	0.0459874	21.7332	0.980325	0.000224772
database_2013_01_08_Traj1_R.mat	E2_15000.xls	2	0.0505426	24.3396	0.93347	0.000164592
database_2013_01_08_Traj1_R.mat	E2_11926.xls	3	0.0504149	28.3235	0.91156	0.000148196
database_2013_01_08_Traj1_R.mat	E2_12479.xls	3	0.0330364	18.5241	1.09217	0.00758584
database_2013_01_08_Traj1_R.mat	E2_12846.xls	3	0.0417554	37.115	0.972638	0.00010645
database_2013_01_08_Traj1_R.mat	E2_13214.xls	3	0.0355033	26.7393	0.998633	0.000238408
database_2013_01_08_Traj1_R.mat	E2_13582.xls	3	0.0365351	28.0394	0.973739	9.75763e-05
database_2013_01_08_Traj1_R.mat	E2_13911.xls	3	0.659072	7.40199	1.9994	0.000149091
database_2013_01_08_Traj1_R.mat	E2_14503.xls	3	0.032908	27.4578	1.02232	0.000602407
database_2013_01_08_Traj1_R.mat	E2_14756.xls	3	0.478713	6.78298	2.01745	0.000224772
database_2013_01_08_Traj1_R.mat	E2_15000.xls	3	0.0342862	36.0294	0.966222	0.000164592
database_2013_01_08_Traj1_R.mat	E2_12479.xls	4	0.0352885	24.9174	1.04751	0.00758584
database_2013_01_08_Traj1_R.mat	E2_13582.xls	4	0.0179561	20.2397	0.95325	9.75763e-05
database_2013_01_08_Traj1_R.mat	E2_13911.xls	4	0.020263	26.058	1.04037	0.000149091
database_2013_01_08_Traj1_R.mat	E2_14756.xls	4	0.0352275	16.7498	1.04997	0.000224772
database_2013_01_08_Traj1_R.mat	E2_13911.xls	5	0.017369	16.9188	0.895563	0.000149091
database_2013_01_08_Traj1_R.mat	E2_14756.xls	5	0.0211594	21.9409	1.00452	0.000224772
database_2013_01_29_Traj1_R.mat	E1_09389.xls	1	0.0696613	57.8453	0.880334	0.00232659
database_2013_01_29_Traj1_R.mat	E1_09468.xls	1	0.0898013	60.2277	0.923505	0.00322112
database_2013_01_29_Traj1_R.mat	E1_09634.xls	1	0.0301002	21.2387	0.967724	0.000163656
database_2013_01_29_Traj1_R.mat	E1_09799.xls	1	0.0551765	32.3434	0.91375	0.000241574
database_2013_01_29_Traj1_R.mat	E1_10049.xls	1	0.0404282	31.5691	0.961054	0.000214214
database_2013_01_29_Traj1_R.mat	E1_10297.xls	1	0.087855	20.8399	1.00832	0.000302578
database_2013_01_29_Traj1_R.mat	E1_10543.xls	1	0.078044	40.833	1.06899	0.00545976
database_2013_01_29_Traj1_R.mat	E1_10705.xls	1	0.150978	3.13157	0.500387	0.000730003
database_2013_01_29_Traj1_R.mat	E1_10876.xls	1	0.079076	9.21483	1.82331	0.000239301
database_2013_01_29_Traj1_R.mat	E1_11134.xls	1	0.0581141	32.1879	1.00145	0.00025034
database_2013_01_29_Traj1_R.mat	E1_11382.xls	1	0.0662145	35.995	0.984324	0.00023651
database_2013_01_29_Traj1_R.mat	E1_11631.xls	1	0.0294553	21.6336	1.00126	0.00015263
database_2013_01_29_Traj1_R.mat	E1_11876.xls	1	0.0246772	21.9236	0.996694	0.000121845
database_2013_01_29_Traj1_R.mat	E1_12049.xls	1	0.0754352	58.5866	0.893017	0.00036697
database_2013_01_29_Traj1_R.mat	E1_12218.xls	1	0.0348554	19.5256	0.914924	0.0027735
database_2013_01_29_Traj1_R.mat	E1_12463.xls	1	0.0726504	34.4554	1.0553	0.00028264
database_2013_01_29_Traj1_R.mat	E1_12711.xls	1	0.0452157	31.4784	1.01806	0.0011545
database_2013_01_29_Traj1_R.mat	E1_12962.xls	1	0.0348273	32.9249	0.956712	0.00060868
database_2013_01_29_Traj1_R.mat	E1_13207.xls	1	0.0503758	36.6733	0.941871	0.000406239
database_2013_01_29_Traj1_R.mat	E1_13538.xls	1	0.128455	21.2286	1.33234	0.000151999
database_2013_01_29_Traj1_R.mat	E1_13785.xls	1	0.0656682	31.3745	1.06779	0.00207475
database_2013_01_29_Traj1_R.mat	E1_14043.xls	1	0.380531	7.61168	8.05568	0.00296025
database_2013_01_29_Traj1_R.mat	E1_14750.xls	1	0.0223111	20.2913	1.11367	0.00111456
database_2013_01_29_Traj1_R.mat	E2_08888.xls	1	0.117087	76.12	0.870644	0.000165684
database_2013_01_29_Traj1_R.mat	E2_09065.xls	1	0.0325605	29.8171	0.972485	0.000104258
database_2013_01_29_Traj1_R.mat	E2_09239.xls	1	0.0640848	37.0045	0.925019	0.000119048
database_2013_01_29_Traj1_R.mat	E2_09389.xls	1	0.848349	9.43745	0.69054	0.00187097
database_2013_01_29_Traj1_R.mat	E2_09468.xls	1	0.0480107	46.4499	0.92076	0.00264724
database_2013_01_29_Traj1_R.mat	E2_09634.xls	1	0.0372936	34.1218	0.956581	0.00338631
database_2013_01_29_Traj1_R.mat	E2_09799.xls	1	0.702389	3.0028	5.13842	0.000477692
database_2013_01_29_Traj1_R.mat	E2_10049.xls	1	0.0469704	26.0013	0.907945	0.00011532
database_2013_01_29_Traj1_R.mat	E2_10297.xls	1	0.031539	21.8217	0.884857	0.000114789
database_2013_01_29_Traj1_R.mat	E2_10543.xls	1	0.0952377	65.8077	0.947539	0.00868642
database_2013_01_29_Traj1_R.mat	E2_10705.xls	1	0.0825285	22.9803	1.16399	0.000272435
database_2013_01_29_Traj1_R.mat	E2_10876.xls	1	0.0566302	18.0803	0.98436	0.000257166
database_2013_01_29_Traj1_R.mat	E2_11134.xls	1	0.0581149	23.9058	0.977014	0.000176379
database_2013_01_29_Traj1_R.mat	E2_11382.xls	1	0.035935	36.1879	0.973185	0.00641619
database_2013_01_29_Traj1_R.mat	E2_11631.xls	1	0.0741017	23.4398	0.985741	0.000156689
database_2013_01_29_Traj1_R.mat	E2_11876.xls	1	0.0552039	57.2716	0.9733	0.00108357
database_2013_01_29_Traj1_R.mat	E2_12049.xls	1	0.0555941	27.9304	1.02939	9.21199e-05
database_2013_01_29_Traj1_R.mat	E2_12218.xls	1	0.0369085	28.3063	0.980268	0.00294258
database_2013_01_29_Traj1_R.mat	E2_12463.xls	1	0.0260472	26.7234	0.998614	0.000157434
database_2013_01_29_Traj1_R.mat	E2_12711.xls	1	0.0348612	26.3185	0.906188	0.00149435
database_2013_01_29_Traj1_R.mat	E2_12962.xls	1	0.0561838	24.2784	0.951303	0.000336562
database_2013_01_29_Traj1_R.mat	E2_13207.xls	1	0.0837539	42.7435	0.941749	0.000277326
database_2013_01_29_Traj1_R.mat	E2_13538.xls	1	0.0575533	24.1188	0.88781	0.000136797
database_2013_01_29_Traj1_R.mat	E2_13785.xls	1	0.0434818	23.6842	0.971818	0.000149054
database_2013_01_29_Traj1_R.mat	E2_14043.xls	1	0.112901	41.5162	0.947038	0.000985223
database_2013_01_29_Traj1_R.mat	E2_14413.xls	1	0.0217682	22.0111	1.04456	0.000181603
database_2013_01_29_Traj1_R.mat	E2_14750.xls	1	0.0484689	24.663	0.99561	0.00109798
database_2013_01_29_Traj1_R.mat	E1_09634.xls	2	0.0477746	17.1413	1.04776	0.000163656
database_2013_01_29_Traj1_R.mat	E1_09799.xls	2	0.382949	3.90305	0.906821	0.000241574
database_2013_01_29_Traj1_R.mat	E1_10049.xls	2	0.310129	5.45137	1.87865	0.000214214
database_2013_01_29_Traj1_R.mat	E1_10297.xls	2	0.542132	5.07639	2.06209	0.000302578
database_2013_01_29_Traj1_R.mat	E1_10543.xls	2	0.470793	1.51355	1.51009	0.00545976
database_2013_01_29_Traj1_R.mat	E1_10705.xls	2	0.104311	53.9649	0.920559	0.000730003
database_2013_01_29_Traj1_R.mat	E1_10876.xls	2	0.574246	1.41378	2.69372	0.000239301
database_2013_01_29_Traj1_R.mat	E1_11134.xls	2	0.625003	1.19215	3.75027	0.00025034
database_2013_01_29_Traj1_R.mat	E1_11382.xls	2	0.783601	1.16113	1.79666	0.00023651
database_2013_01_29_Traj1_R.mat	E1_11631.xls	2	0.0385076	13.3469	0.937129	0.00015263
database_2013_01_29_Traj1_R.mat	E1_11876.xls	2	0.0180614	11.0271	1.06645	0.000121845
database_2013_01_29_Traj1_R.mat	E1_12049.xls	2	0.599255	15.7809	1.37365	0.00036697
database_2013_01_29_Traj1_R.mat	E1_12218.xls	2	0.0250534	10.109	1.13549	0.0027735
database_2013_01_29_Traj1_R.mat	E1_12463.xls	2	0.487654	16.9643	1.05857	0.00028264
database_2013_01_29_Traj1_R.mat	E1_12711.xls	2	0.0683152	32.9008	0.911483	0.0011545
database_2013_01_29_Traj1_R.mat	E1_12962.xls	2	0.0994679	31.5558	1.09593	0.00060868
database_2013_01_29_Traj1_R.mat	E1_13207.xls	2	0.533888	4.76566	3.22512	0.000406239
database_2013_01_29_Traj1_R.mat	E1_13538.xls	2	0.0637117	51.5191	0.880032	0.000151999
database_2013_01_29_Traj1_R.mat	E1_13785.xls	2	0.558447	1.13752	0.628139	0.00207475
database_2013_01_29_Traj1_R.mat	E1_14043.xls	2	0.0763478	57.0471	0.954612	0.00296025
database_2013_01_29_Traj1_R.mat	E1_14750.xls	2	0.0302813	15.4423	0.967476	0.00111456
database_2013_01_29_Traj1_R.mat	E2_08888.xls	2	0.394569	29.0513	5.03282	0.000165684
database_2013_01_29_Traj1_R.mat	E2_09065.xls	2	0.0691914	29.1348	0.896621	0.000104258
database_2013_01_29_Traj1_R.mat	E2_09239.xls	2	0.0908388	23.644	0.988664	0.000119048
database_2013_01_29_Traj1_R.mat	E2_09389.xls	2	0.111948	66.2851	0.877802	0.00187097
database_2013_01_29_Traj1_R.mat	E2_09468.xls	2	0.120105	24.3462	1.05187	0.00264724
database_2013_01_29_Traj1_R.mat	E2_09634.xls	2	0.793906	6.01265	3.24311	0.00338631
database_2013_01_29_Traj1_R.mat	E2_09799.xls	2	0.130171	81.5397	0.895999	0.000477692
database_2013_01_29_Traj1_R.mat	E2_10049.xls	2	0.0318466	18.5259	0.887954	0.00011532
database_2013_01_29_Traj1_R.mat	E2_10297.xls	2	0.0479791	18.7331	0.922591	0.000114789
database_2013_01_29_Traj1_R.mat	E2_10543.xls	2	0	0.493558	2.16521	0.00868642
database_2013_01_29_Traj1_R.mat	E2_10705.xls	2	0.79186	1.63885	2.49234	0.000272435
database_2013_01_29_Traj1_R.mat	E2_10876.xls	2	0.0655554	23.3327	0.937907	0.000257166
database_2013_01_29_Traj1_R.mat	E2_11134.xls	2	0.091976	14.7438	1.09155	0.000176379
database_2013_01_29_Traj1_R.mat	E2_11382.xls	2	0.711417	2.49285	0.409184	0.00641619
database_2013_01_29_Traj1_R.mat	E2_11631.xls	2	0.452885	7.7153	2.2858	0.000156689
database_2013_01_29_Traj1_R.mat	E2_11876.xls	2	0.0954652	100.78	0.856048	0.00108357
database_2013_01_29_Traj1_R.mat	E2_12049.xls	2	0.0390379	27.4704	0.937406	9.21199e-05
database_2013_01_29_Traj1_R.mat	E2_12218.xls	2	0.0333039	20.3972	0.970504	0.00294258
database_2013_01_29_Traj1_R.mat	E2_12463.xls	2	0.0624477	29.681	0.927743	0.000157434
database_2013_01_29_Traj1_R.mat	E2_12711.xls	2	0.0394585	33.8115	0.909641	0.00149435
database_2013_01_29_Traj1_R.mat	E2_12962.xls	2	0.0388106	26.0484	0.995481	0.000336562
database_2013_01_29_Traj1_R.mat	E2_13207.xls	2	0.181289	7.1022	1.90323	0.000277326
database_2013_01_29_Traj1_R.mat	E2_13538.xls	2	0.0421441	10.552	0.916336	0.000136797
database_2013_01_29_Traj1_R.mat	E2_13785.xls	2	0.0355086	15.7718	0.966198	0.000149054
database_2013_01_29_Traj1_R.mat	E2_14043.xls	2	0.773551	2.36831	0.501122	0.000985223
database_2013_01_29_Traj1_R.mat	E2_14413.xls	2	0.0258299	15.7172	1.05326	0.000181603
database_2013_01_29_Traj1_R.mat	E2_14750.xls	2	0.0282687	17.5845	0.933647	0.00109798
database_2013_01_29_Traj1_R.mat	E1_09634.xls	3	0.0211365	19.7351	0.948868	0.000163656
database_2013_01_29_Traj1_R.mat	E1_09799.xls	3	0.0270665	28.7679	0.973889	0.000241574
database_2013_01_29_Traj1_R.mat	E1_10049.xls	3	0.0659554	29.7791	0.997064	0.000214214
database_2013_01_29_Traj1_R.mat	E1_10297.xls	3	0.0577265	20.3056	1.04284	0.000302578
database_2013_01_29_Traj1_R.mat	E1_10876.xls	3	0.0449059	31.2799	0.949459	0.000239301
database_2013_01_29_Traj1_R.mat	E1_11134.xls	3	0.0444678	37.4949	0.949744	0.00025034
database_2013_01_29_Traj1_R.mat	E1_11382.xls	3	0.0402609	33.5068	0.934958	0.00023651
database_2013_01_29_Traj1_R.mat	E1_11631.xls	3	0.0143628	19.5069	0.914644	0.00015263
database_2013_01_29_Traj1_R.mat	E1_11876.xls	3	0.0379054	20.4882	0.956	0.000121845
database_2013_01_29_Traj1_R.mat	E1_12218.xls	3	0.212186	10.0397	1.40351	0.0027735
database_2013_01_29_Traj1_R.mat	E1_12463.xls	3	0.0287279	22.5488	0.969812	0.00028264
database_2013_01_29_Traj1_R.mat	E1_13207.xls	3	0.0343882	28.1565	0.977451	0.000406239
database_2013_01_29_Traj1_R.mat	E1_13785.xls	3	0.0367892	30.1841	1.0499	0.00207475
database_2013_01_29_Traj1_R.mat	E1_14750.xls	3	0.0752644	26.1847	1.00152	0.00111456
database_2013_01_29_Traj1_R.mat	E2_09065.xls	3	0.0322113	28.316	0.960767	0.000104258
database_2013_01_29_Traj1_R.mat	E2_09239.xls	3	0.053813	41.2151	0.878176	0.000119048
database_2013_01_29_Traj1_R.mat	E2_09634.xls	3	0.0435393	30.6645	0.923922	0.00338631
database_2013_01_29_Traj1_R.mat	E2_10049.xls	3	0.0486971	26.5701	1.02683	0.00011532
database_2013_01_29_Traj1_R.mat	E2_10297.xls	3	0.0369286	26.5889	0.968946	0.000114789
database_2013_01_29_Traj1_R.mat	E2_10705.xls	3	0.0374149	28.4431	0.98213	0.000272435
database_2013_01_29_Traj1_R.mat	E2_10876.xls	3	0.70536	4.0403	2.05336	0.000257166
database_2013_01_29_Traj1_R.mat	E2_11134.xls	3	0.034974	25.7921	0.968301	0.000176379
database_2013_01_29_Traj1_R.mat	E2_11382.xls	3	0.0788733	34.4429	0.928395	0.00641619
database_2013_01_29_Traj1_R.mat	E2_11631.xls	3	0.0392771	31.8164	0.980176	0.000156689
database_2013_01_29_Traj1_R.mat	E2_11876.xls	3	0	1.04367	1.19382	0.00108357
database_2013_01_29_Traj1_R.mat	E2_12049.xls	3	0.0323796	29.179	0.981932	9.21199e-05
database_2013_01_29_Traj1_R.mat	E2_12218.xls	3	0.0418829	18.6628	0.99954	0.00294258
database_2013_01_29_Traj1_R.mat	E2_12463.xls	3	0.0710211	31.2654	0.852956	0.000157434
database_2013_01_29_Traj1_R.mat	E2_12711.xls	3	0.0313862	27.8667	0.957977	0.00149435
database_2013_01_29_Traj1_R.mat	E2_12962.xls	3	0.0490157	33.0614	0.993319	0.000336562
database_2013_01_29_Traj1_R.mat	E2_13207.xls	3	0.0364566	36.3487	0.948074	0.000277326
database_2013_01_29_Traj1_R.mat	E2_13538.xls	3	0.0218091	22.3601	0.892347	0.000136797
database_2013_01_29_Traj1_R.mat	E2_13785.xls	3	0.0377523	22.414	0.966995	0.000149054
database_2013_01_29_Traj1_R.mat	E2_14043.xls	3	0.0499979	39.4718	0.939124	0.000985223
database_2013_01_29_Traj1_R.mat	E2_14413.xls	3	0.0694436	29.7818	0.918274	0.000181603
database_2013_01_29_Traj1_R.mat	E2_14750.xls	3	0.0366132	23.0237	0.940839	0.00109798
database_2013_01_29_Traj1_R.mat	E1_09634.xls	4	0.0287929	12.4801	0.943226	0.000163656
database_2013_01_29_Traj1_R.mat	E1_10297.xls	4	0.0120498	17.0326	0.898533	0.000302578
database_2013_01_29_Traj1_R.mat	E1_10876.xls	4	0.0427306	27.5435	0.941687	0.000239301
database_2013_01_29_Traj1_R.mat	E1_11631.xls	4	0.00726503	15.9136	0.890363	0.00015263
database_2013_01_29_Traj1_R.mat	E1_11876.xls	4	0.0103661	16.3122	0.979505	0.000121845
database_2013_01_29_Traj1_R.mat	E1_12218.xls	4	0.052339	22.8491	0.953973	0.0027735
database_2013_01_29_Traj1_R.mat	E2_10049.xls	4	0.0196335	17.1446	1.07285	0.00011532
database_2013_01_29_Traj1_R.mat	E2_10297.xls	4	0.0359095	21.5531	0.947767	0.000114789
database_2013_01_29_Traj1_R.mat	E2_10705.xls	4	0.0426868	30.0455	1.00982	0.000272435
database_2013_01_29_Traj1_R.mat	E2_10876.xls	4	0.0221488	23.2822	0.966393	0.000257166
database_2013_01_29_Traj1_R.mat	E2_11134.xls	4	0.0143001	19.7868	0.960898	0.000176379
database_2013_01_29_Traj1_R.mat	E2_11631.xls	4	0.0349238	24.8359	1.05855	0.000156689
database_2013_01_29_Traj1_R.mat	E2_11876.xls	4	0.104154	91.1258	0.83558	0.00108357
database_2013_01_29_Traj1_R.mat	E2_12218.xls	4	0.0597376	21.9235	1.10655	0.00294258
database_2013_01_29_Traj1_R.mat	E2_12463.xls	4	0.751539	2.53503	0.494251	0.000157434
database_2013_01_29_Traj1_R.mat	E2_13538.xls	4	0.0224296	18.5078	0.941616	0.000136797
database_2013_01_29_Traj1_R.mat	E2_13785.xls	4	0.0228281	19.6619	0.94641	0.000149054
database_2013_01_29_Traj1_R.mat	E2_14413.xls	4	0.0232145	15.3304	1.13979	0.000181603
database_2013_01_29_Traj1_R.mat	E2_14750.xls	4	0.00973484	11.4746	1.09031	0.00109798
database_2013_01_29_Traj1_R.mat	E2_10876.xls	5	0.0298978	15.6057	1.00731	0.000257166
database_2013_01_29_Traj1_R.mat	E2_11876.xls	5	0.0595013	63.2075	1.00245	0.00108357
database_2013_01_29_Traj1_R.mat	E2_14413.xls	5	0.531387	0.351615	1.47337	0.000181603
database_2013_01_29_Traj2_L_updatedGPeBorder.mat	E1_13265.xls	1	0.0314162	23.6424	1.0525	8.61262e-05
database_2013_01_29_Traj2_L_updatedGPeBorder.mat	E1_13595.xls	1	0.0316939	20.7227	0.994527	8.09458e-05
database_2013_01_29_Traj2_L_updatedGPeBorder.mat	E1_13965.xls	1	0.025275	24.012	0.888441	7.87517e-05
database_2013_01_29_Traj2_L_updatedGPeBorder.mat	E1_14334.xls	1	0.0247769	24.7101	0.859214	8.29326e-05
database_2013_01_29_Traj2_L_updatedGPeBorder.mat	E1_14671.xls	1	0.0366319	18.8041	0.885561	8.01439e-05
database_2013_01_29_Traj2_L_updatedGPeBorder.mat	E1_15000.xls	1	0.0203498	28.1007	1.08956	0.000100451
database_2013_01_29_Traj2_L_updatedGPeBorder.mat	E2_12440.xls	1	0.167859	40.01	1.01878	0.000166753
database_2013_01_29_Traj2_L_updatedGPeBorder.mat	E2_12602.xls	1	0.129525	42.6319	0.96862	0.0001163
database_2013_01_29_Traj2_L_updatedGPeBorder.mat	E2_12930.xls	1	0.0432661	33.8943	1.00118	0.000457192
database_2013_01_29_Traj2_L_updatedGPeBorder.mat	E2_13265.xls	1	0.0511356	38.7358	0.916653	7.39314e-05
database_2013_01_29_Traj2_L_updatedGPeBorder.mat	E2_13595.xls	1	0.0444537	31.7227	1.04345	9.22923e-05
database_2013_01_29_Traj2_L_updatedGPeBorder.mat	E2_13965.xls	1	0.0470206	31.0196	0.966834	9.61003e-05
database_2013_01_29_Traj2_L_updatedGPeBorder.mat	E2_14334.xls	1	0.0275037	27.8514	0.912606	7.14228e-05
database_2013_01_29_Traj2_L_updatedGPeBorder.mat	E2_14671.xls	1	0.0424242	26.0541	0.861086	8.8226e-05
database_2013_01_29_Traj2_L_updatedGPeBorder.mat	E2_15000.xls	1	0.0183888	24.9963	0.902783	9.00734e-05
database_2013_01_29_Traj2_L_updatedGPeBorder.mat	E1_13265.xls	2	0.0686559	24.9513	0.908844	8.61262e-05
database_2013_01_29_Traj2_L_updatedGPeBorder.mat	E1_13595.xls	2	0.0471009	20.8279	1.09906	8.09458e-05
database_2013_01_29_Traj2_L_updatedGPeBorder.mat	E1_13965.xls	2	0.048641	19.353	0.876393	7.87517e-05
database_2013_01_29_Traj2_L_updatedGPeBorder.mat	E1_14334.xls	2	0.0297369	17.2673	0.757329	8.29326e-05
database_2013_01_29_Traj2_L_updatedGPeBorder.mat	E1_14671.xls	2	0.0340585	22.2068	0.999423	8.01439e-05
database_2013_01_29_Traj2_L_updatedGPeBorder.mat	E1_15000.xls	2	0.0369139	27.3958	0.929404	0.000100451
database_2013_01_29_Traj2_L_updatedGPeBorder.mat	E2_12440.xls	2	0.0741692	54.152	0.950298	0.000166753
database_2013_01_29_Traj2_L_updatedGPeBorder.mat	E2_12602.xls	2	0.0758946	52.713	0.923309	0.0001163
database_2013_01_29_Traj2_L_updatedGPeBorder.mat	E2_12930.xls	2	0.0884032	34.756	0.959064	0.000457192
database_2013_01_29_Traj2_L_updatedGPeBorder.mat	E2_13265.xls	2	0.0971917	38.9815	0.865434	7.39314e-05
database_2013_01_29_Traj2_L_updatedGPeBorder.mat	E2_13595.xls	2	0.0525351	33.7185	0.853026	9.22923e-05
database_2013_01_29_Traj2_L_updatedGPeBorder.mat	E2_13965.xls	2	0.0473343	34.9643	0.799678	9.61003e-05
database_2013_01_29_Traj2_L_updatedGPeBorder.mat	E2_14334.xls	2	0.0305574	17.3697	0.861918	7.14228e-05
database_2013_01_29_Traj2_L_updatedGPeBorder.mat	E2_14671.xls	2	0.0655584	17.4293	0.960471	8.8226e-05
database_2013_01_29_Traj2_L_updatedGPeBorder.mat	E2_15000.xls	2	0.0377607	27.8154	0.911924	9.00734e-05
database_2013_01_29_Traj2_L_updatedGPeBorder.mat	E1_13265.xls	3	0.0383985	22.4971	1.03835	8.61262e-05
database_2013_01_29_Traj2_L_updatedGPeBorder.mat	E1_13595.xls	3	0.0104975	15.4631	0.896771	8.09458e-05
database_2013_01_29_Traj2_L_updatedGPeBorder.mat	E1_13965.xls	3	0.0188024	25.804	1.10987	7.87517e-05
database_2013_01_29_Traj2_L_updatedGPeBorder.mat	E1_14334.xls	3	0.0318857	22.0307	0.809709	8.29326e-05
database_2013_01_29_Traj2_L_updatedGPeBorder.mat	E1_14671.xls	3	0.0153495	13.9688	1.0308	8.01439e-05
database_2013_01_29_Traj2_L_updatedGPeBorder.mat	E1_15000.xls	3	0.0278615	26.1271	0.964858	0.000100451
database_2013_01_29_Traj2_L_updatedGPeBorder.mat	E2_12930.xls	3	0.0355579	32.2371	0.946258	0.000457192
database_2013_01_29_Traj2_L_updatedGPeBorder.mat	E2_13265.xls	3	0.0152815	20.4735	1.01305	7.39314e-05
database_2013_01_29_Traj2_L_updatedGPeBorder.mat	E2_13595.xls	3	0.0344722	31.1975	0.909177	9.22923e-05
database_2013_01_29_Traj2_L_updatedGPeBorder.mat	E2_13965.xls	3	0.0282177	35.8608	0.992707	9.61003e-05
database_2013_01_29_Traj2_L_updatedGPeBorder.mat	E2_14334.xls	3	0.0381968	23.9582	0.963257	7.14228e-05
database_2013_01_29_Traj2_L_updatedGPeBorder.mat	E2_14671.xls	3	0.0400322	24.976	0.974305	8.8226e-05
database_2013_01_29_Traj2_L_updatedGPeBorder.mat	E2_15000.xls	3	0.0475232	21.0965	0.980042	9.00734e-05
database_2013_01_29_Traj2_L_updatedGPeBorder.mat	E1_13595.xls	4	0.0917008	13.5697	0.965023	8.09458e-05
database_2013_01_29_Traj2_L_updatedGPeBorder.mat	E1_14334.xls	4	0.00704792	13.6948	0.929784	8.29326e-05
database_2013_01_29_Traj2_L_updatedGPeBorder.mat	E1_14671.xls	4	0.0122209	17.9087	1.25155	8.01439e-05
database_2013_01_29_Traj2_L_updatedGPeBorder.mat	E2_14334.xls	4	0.0248459	26.354	0.934276	7.14228e-05
database_2013_01_29_Traj2_L_updatedGPeBorder.mat	E2_14671.xls	4	0.034231	24.6166	0.990684	8.8226e-05
database_2013_01_29_Traj2_L_updatedGPeBorder.mat	E2_15000.xls	4	0.0184797	18.9821	0.946703	9.00734e-05
database_2013_04_15_Traj1_L.mat	E2_11496.xls	1	0.403481	54.0157	1.09843	0.000164817
database_2013_04_15_Traj1_L.mat	E2_11654.xls	1	0.0416378	21.3505	1.07191	0.000143636
database_2013_04_15_Traj1_L.mat	E2_11826.xls	1	0.0463868	26.033	0.939106	0.000146516
database_2013_04_15_Traj1_L.mat	E2_12062.xls	1	0.0229607	28.756	0.940377	0.000297313
database_2013_04_15_Traj1_L.mat	E2_12234.xls	1	0.077957	41.5336	0.925497	0.000176701
database_2013_04_15_Traj1_L.mat	E2_12396.xls	1	0.0805463	23.5593	1.03758	0.00198948
database_2013_04_15_Traj1_L.mat	E2_12649.xls	1	0.0213218	1.56373	0.73631	0.000507641
database_2013_04_15_Traj1_L.mat	E2_12893.xls	1	0.0482874	24.1644	1.09979	9.04068e-05
database_2013_04_15_Traj1_L.mat	E2_13061.xls	1	0.0552346	31.1334	0.919538	0.000108876
database_2013_04_15_Traj1_L.mat	E2_13385.xls	1	0.037966	29.3007	0.941762	0.000101247
database_2013_04_15_Traj1_L.mat	E2_13721.xls	1	0.0504943	26.6407	0.919165	0.00011528
database_2013_04_15_Traj1_L.mat	E2_14053.xls	1	0.0475089	34.1835	0.93112	0.000109534
database_2013_04_15_Traj1_L.mat	E2_14226.xls	1	0.0366825	29.8856	0.901984	9.54406e-05
database_2013_04_15_Traj1_L.mat	E2_14398.xls	1	0.026696	31.1169	0.978739	0.000228493
database_2013_04_15_Traj1_L.mat	E2_14407.xls	1	0.114671	84.9849	0.815818	0.00312935
database_2013_04_15_Traj1_L.mat	E2_14671.xls	1	0.0287888	28.5989	0.949745	9.83271e-05
database_2013_04_15_Traj1_L.mat	E2_14831.xls	1	0.0299674	25.6313	0.970967	8.76892e-05
database_2013_04_15_Traj1_L.mat	E2_15000.xls	1	0.0374773	25.2272	1.00144	0.000111623
database_2013_04_15_Traj1_L.mat	E2_11496.xls	2	0.0908624	60.9152	0.890872	0.000164817
database_2013_04_15_Traj1_L.mat	E2_11654.xls	2	0.244168	19.5426	0.881214	0.000143636
database_2013_04_15_Traj1_L.mat	E2_11826.xls	2	0.0914593	25.942	0.919965	0.000146516
database_2013_04_15_Traj1_L.mat	E2_12062.xls	2	0.0398615	23.8432	0.899049	0.000297313
database_2013_04_15_Traj1_L.mat	E2_12234.xls	2	0.370848	16.1605	1.89017	0.000176701
database_2013_04_15_Traj1_L.mat	E2_12396.xls	2	0.368034	8.20435	1.90976	0.00198948
database_2013_04_15_Traj1_L.mat	E2_12649.xls	2	0.139323	89.4536	0.831168	0.000507641
database_2013_04_15_Traj1_L.mat	E2_12893.xls	2	0.0386842	21.4198	0.946706	9.04068e-05
database_2013_04_15_Traj1_L.mat	E2_13061.xls	2	0.0495404	34.8374	0.942198	0.000108876
database_2013_04_15_Traj1_L.mat	E2_13385.xls	2	0.0503822	33.1323	0.907394	0.000101247
database_2013_04_15_Traj1_L.mat	E2_13721.xls	2	0.0469736	19.387	0.97402	0.00011528
database_2013_04_15_Traj1_L.mat	E2_14053.xls	2	0.0513403	35.0229	0.981928	0.000109534
database_2013_04_15_Traj1_L.mat	E2_14226.xls	2	0.0317941	17.6063	1.00273	9.54406e-05
database_2013_04_15_Traj1_L.mat	E2_14398.xls	2	0.0396772	26.3297	1.0472	0.000228493
database_2013_04_15_Traj1_L.mat	E2_14671.xls	2	0.0382595	27.7266	0.980676	9.83271e-05
database_2013_04_15_Traj1_L.mat	E2_14831.xls	2	0.03062	22.1972	0.938264	8.76892e-05
database_2013_04_15_Traj1_L.mat	E2_15000.xls	2	0.0672704	20.7476	1.0322	0.000111623
database_2013_04_15_Traj1_L.mat	E2_11654.xls	3	0.0680529	27.2047	1.03552	0.000143636
database_2013_04_15_Traj1_L.mat	E2_11826.xls	3	0.041387	29.765	0.951437	0.000146516
database_2013_04_15_Traj1_L.mat	E2_12062.xls	3	0.0421494	27.1184	0.943038	0.000297313
database_2013_04_15_Traj1_L.mat	E2_12234.xls	3	0.0541616	32.7328	0.969496	0.000176701
database_2013_04_15_Traj1_L.mat	E2_12396.xls	3	0.0389679	34.7368	0.955286	0.00198948
database_2013_04_15_Traj1_L.mat	E2_12893.xls	3	0.0269561	29.0569	0.863375	9.04068e-05
database_2013_04_15_Traj1_L.mat	E2_13061.xls	3	0.0307615	30.8187	0.979952	0.000108876
database_2013_04_15_Traj1_L.mat	E2_13385.xls	3	0.0486573	27.723	0.810753	0.000101247
database_2013_04_15_Traj1_L.mat	E2_13721.xls	3	0.0475384	29.9378	0.955722	0.00011528
database_2013_04_15_Traj1_L.mat	E2_14053.xls	3	0.0366171	36.3963	0.927147	0.000109534
database_2013_04_15_Traj1_L.mat	E2_14226.xls	3	0.0517265	28.9827	0.938163	9.54406e-05
database_2013_04_15_Traj1_L.mat	E2_14398.xls	3	0.071448	32.3137	0.925728	0.000228493
database_2013_04_15_Traj1_L.mat	E2_14671.xls	3	0.0294299	22.8667	0.88186	9.83271e-05
database_2013_04_15_Traj1_L.mat	E2_14831.xls	3	0.0290837	27.1182	0.98269	8.76892e-05
database_2013_04_15_Traj1_L.mat	E2_15000.xls	3	0.0415527	26.7597	0.991562	0.000111623
database_2013_04_15_Traj1_L.mat	E2_11654.xls	4	0.0273509	21.824	0.977081	0.000143636
database_2013_04_15_Traj1_L.mat	E2_12062.xls	4	0.0187648	15.6553	1.04214	0.000297313
database_2013_04_15_Traj1_L.mat	E2_12396.xls	4	0.0294681	22.0915	1.00463	0.00198948
database_2013_04_15_Traj1_L.mat	E2_12893.xls	4	0.0214763	20.7634	1.08123	9.04068e-05
database_2013_04_15_Traj1_L.mat	E2_13721.xls	4	0.0310412	19.1233	0.962454	0.00011528
database_2013_04_15_Traj1_L.mat	E2_14226.xls	4	0.0497581	21.3985	0.989717	9.54406e-05
database_2013_04_15_Traj1_L.mat	E2_14671.xls	4	0.0194976	20.1252	0.922139	9.83271e-05
database_2013_04_15_Traj1_L.mat	E2_14831.xls	4	0.0242674	22.5867	1.00829	8.76892e-05
database_2013_04_15_Traj1_L.mat	E2_15000.xls	4	0.0390149	19.608	0.997642	0.000111623
database_2014_07_01_Traj1_R_updatedGPeBorder.mat	E1_RT1D10.645F0001.xls	1	0.119	56.6713	1.0141	0.000139417	4.02851e-08
database_2014_07_01_Traj1_R_updatedGPeBorder.mat	E1_RT1D10.852F0001.xls	1	0.0413689	50.7633	0.912693	4.90669e-05	2.46965e-08
database_2014_07_01_Traj1_R_updatedGPeBorder.mat	E1_RT1D11.046F0001.xls	1	0.448599	16.5221	2.98751	0.000208503	1.80514e-07
database_2014_07_01_Traj1_R_updatedGPeBorder.mat	E1_RT1D11.211F0001.xls	1	0.0414053	42.121	0.940253	8.57137e-05	1.30271e-07
database_2014_07_01_Traj1_R_updatedGPeBorder.mat	E1_RT1D11.380F0001.xls	1	0.0568944	39.6401	0.96547	0.000126305	1.04189e-06
database_2014_07_01_Traj1_R_updatedGPeBorder.mat	E1_RT1D11.727F0001.xls	1	0.0706475	33.9562	0.989871	0.000212534	5.9357e-07
database_2014_07_01_Traj1_R_updatedGPeBorder.mat	E1_RT1D11.800F0001.xls	1	0.0566708	52.0927	0.885775	0.000151084	9.92267e-08
database_2014_07_01_Traj1_R_updatedGPeBorder.mat	E1_RT1D11.844F0001.xls	1	0.0347272	36.2839	0.973714	7.93376e-05	2.0807e-07
database_2014_07_01_Traj1_R_updatedGPeBorder.mat	E1_RT1D11.941F0001.xls	1	0.0507248	43.3508	0.966008	5.34821e-05	7.5412e-07
database_2014_07_01_Traj1_R_updatedGPeBorder.mat	E1_RT1D12.140F0001.xls	1	0.032615	32.133	0.939409	0.000143675	5.81492e-07
database_2014_07_01_Traj1_R_updatedGPeBorder.mat	E1_RT1D12.323F0001.xls	1	0.000139115	1.83167	0.494358	0.000920952	6.57533e-07
database_2014_07_01_Traj1_R_updatedGPeBorder.mat	E1_RT1D12.511F0001.xls	1	0.0286606	34.5175	0.937106	0.00179769	7.33719e-08
database_2014_07_01_Traj1_R_updatedGPeBorder.mat	E1_RT1D12.889F0001.xls	1	0.0450886	55.1806	0.895274	8.97048e-05	8.49492e-08
database_2014_07_01_Traj1_R_updatedGPeBorder.mat	E1_RT1D13.079F0001.xls	1	0.253937	12.7295	2.34464	0.000221378	1.91798e-07
database_2014_07_01_Traj1_R_updatedGPeBorder.mat	E1_RT1D13.529F0001.xls	1	0.0695681	35.7985	0.942409	0.000251001	3.27292e-08
database_2014_07_01_Traj1_R_updatedGPeBorder.mat	E1_RT1D13.748F0001.xls	1	0.498301	1.95934	1.94386	0.000621202	5.18415e-06
database_2014_07_01_Traj1_R_updatedGPeBorder.mat	E1_RT1D13.996F0001.xls	1	0.043396	44.2807	0.943031	0.000139059	1.76305e-07
database_2014_07_01_Traj1_R_updatedGPeBorder.mat	E1_RT1D14.131F0001.xls	1	0.0716417	64.0869	0.86117	0.000207381	1.32023e-07
database_2014_07_01_Traj1_R_updatedGPeBorder.mat	E1_RT1D14.261F0001.xls	1	0.541085	2.77618	1.70718	0.000566551	1.00296e-05
database_2014_07_01_Traj1_R_updatedGPeBorder.mat	E1_RT1D14.473F0001.xls	1	0.0626519	56.1135	0.911129	0.000103546	1.73329e-08
database_2014_07_01_Traj1_R_updatedGPeBorder.mat	E1_RT1D14.732F0001.xls	1	0.0471193	51.6175	0.75643	5.20778e-05	2.65054e-05
database_2014_07_01_Traj1_R_updatedGPeBorder.mat	E1_RT1D14.812F0001.xls	1	0.0340529	33.0773	0.92859	9.80115e-05	3.31803e-07
database_2014_07_01_Traj1_R_updatedGPeBorder.mat	E1_RT1D15.000F0001.xls	1	0.122442	121.127	0.797154	0.00327093	5.1575e-07
database_2014_07_01_Traj1_R_updatedGPeBorder.mat	E2_RT1D11.941F0001.xls	1	0.137145	163.265	0.67523	0.00291096	3.5118e-07
database_2014_07_01_Traj1_R_updatedGPeBorder.mat	E2_RT1D12.140F0001.xls	1	0.0404386	40.5147	0.854009	0.000113323	6.40786e-06
database_2014_07_01_Traj1_R_updatedGPeBorder.mat	E2_RT1D12.323F0001.xls	1	0.0360052	39.4793	0.904001	6.32691e-05	6.61949e-07
database_2014_07_01_Traj1_R_updatedGPeBorder.mat	E2_RT1D12.511F0001.xls	1	0.050466	35.5134	0.955807	8.02471e-05	1.46708e-07
database_2014_07_01_Traj1_R_updatedGPeBorder.mat	E2_RT1D12.889F0001.xls	1	0.13104	155.479	0.685995	0.000209777	4.61343e-08
database_2014_07_01_Traj1_R_updatedGPeBorder.mat	E2_RT1D13.079F0001.xls	1	0.0588423	47.7317	0.948267	9.1404e-05	2.6704e-07
database_2014_07_01_Traj1_R_updatedGPeBorder.mat	E2_RT1D13.529F0001.xls	1	0.401548	2.36425	0.724096	0.000723216	2.03682e-05
database_2014_07_01_Traj1_R_updatedGPeBorder.mat	E2_RT1D13.748F0001.xls	1	0.0363839	43.8802	0.953342	0.000138705	1.46092e-07
database_2014_07_01_Traj1_R_updatedGPeBorder.mat	E2_RT1D13.996F0001.xls	1	0.468457	6.99523	2.12261	0.00024285	3.77292e-06
database_2014_07_01_Traj1_R_updatedGPeBorder.mat	E2_RT1D14.131F0001.xls	1	0.0460702	47.1666	0.8581	0.000217541	1.62044e-06
database_2014_07_01_Traj1_R_updatedGPeBorder.mat	E2_RT1D14.261F0001.xls	1	0.0542367	52.8384	0.933411	9.33612e-05	1.87466e-07
database_2014_07_01_Traj1_R_updatedGPeBorder.mat	E2_RT1D14.473F0001.xls	1	0.103395	88.7345	0.881565	0.000675698	7.39791e-08
database_2014_07_01_Traj1_R_updatedGPeBorder.mat	E2_RT1D14.732F0001.xls	1	0.0293016	38.7357	0.845165	5.40221e-05	0.000230724
database_2014_07_01_Traj1_R_updatedGPeBorder.mat	E2_RT1D14.812F0001.xls	1	0.0339639	40.5991	0.948906	8.47477e-05	1.74555e-06
database_2014_07_01_Traj1_R_updatedGPeBorder.mat	E2_RT1D15.000F0001.xls	1	0.0350384	31.6879	0.950051	8.76503e-05	1.05218e-06
database_2014_07_01_Traj1_R_updatedGPeBorder.mat	E1_RT1D10.645F0001.xls	2	0.110899	120.603	0.78903	0.000139417	4.26155e-08
database_2014_07_01_Traj1_R_updatedGPeBorder.mat	E1_RT1D10.852F0001.xls	2	0.0398462	45.912	0.876162	4.90669e-05	5.16961e-08
database_2014_07_01_Traj1_R_updatedGPeBorder.mat	E1_RT1D11.046F0001.xls	2	0.109564	110.461	0.7921	0.000208503	1.00595e-08
database_2014_07_01_Traj1_R_updatedGPeBorder.mat	E1_RT1D11.211F0001.xls	2	0.0557631	29.1164	0.925737	8.57137e-05	2.701e-07
database_2014_07_01_Traj1_R_updatedGPeBorder.mat	E1_RT1D11.380F0001.xls	2	0.0780282	7.3526	1.11509	0.000126305	1.61512e-06
database_2014_07_01_Traj1_R_updatedGPeBorder.mat	E1_RT1D11.727F0001.xls	2	0.0238143	19.3119	1.00695	0.000212534	1.18034e-06
database_2014_07_01_Traj1_R_updatedGPeBorder.mat	E1_RT1D11.800F0001.xls	2	0.0528434	30.1637	0.965499	0.000151084	1.28529e-07
database_2014_07_01_Traj1_R_updatedGPeBorder.mat	E1_RT1D11.844F0001.xls	2	0.0342763	25.868	0.93684	7.93376e-05	4.49744e-07
database_2014_07_01_Traj1_R_updatedGPeBorder.mat	E1_RT1D11.941F0001.xls	2	0.0395486	40.2615	0.922181	5.34821e-05	1.71929e-06
database_2014_07_01_Traj1_R_updatedGPeBorder.mat	E1_RT1D12.140F0001.xls	2	0.0420273	29.1277	0.991049	0.000143675	1.47592e-06
database_2014_07_01_Traj1_R_updatedGPeBorder.mat	E1_RT1D12.323F0001.xls	2	0.131069	162.455	0.654448	0.000920952	1.07735e-07
database_2014_07_01_Traj1_R_updatedGPeBorder.mat	E1_RT1D12.511F0001.xls	2	0.0440394	33.218	0.926695	0.00179769	7.58289e-09
database_2014_07_01_Traj1_R_updatedGPeBorder.mat	E1_RT1D12.889F0001.xls	2	0.065267	54.6604	0.911147	8.97048e-05	1.27118e-07
database_2014_07_01_Traj1_R_updatedGPeBorder.mat	E1_RT1D13.079F0001.xls	2	0.106001	115.929	0.757198	0.000221378	1.78815e-08
database_2014_07_01_Traj1_R_updatedGPeBorder.mat	E1_RT1D13.529F0001.xls	2	0.0498582	51.7318	0.928542	0.000251001	2.92546e-08
database_2014_07_01_Traj1_R_updatedGPeBorder.mat	E1_RT1D13.748F0001.xls	2	0.136775	149.033	0.699303	0.000621202	1.7371e-08
database_2014_07_01_Traj1_R_updatedGPeBorder.mat	E1_RT1D13.996F0001.xls	2	0.0748181	22.4242	1.17546	0.000139059	1.64741e-07
database_2014_07_01_Traj1_R_updatedGPeBorder.mat	E1_RT1D14.131F0001.xls	2	0.121447	22.869	1.0044	0.000207381	1.33453e-07
database_2014_07_01_Traj1_R_updatedGPeBorder.mat	E1_RT1D14.261F0001.xls	2	0.128541	147.034	0.719336	0.000566551	8.02647e-08
database_2014_07_01_Traj1_R_updatedGPeBorder.mat	E1_RT1D14.473F0001.xls	2	0.0674364	58.2417	0.890051	0.000103546	2.13536e-08
database_2014_07_01_Traj1_R_updatedGPeBorder.mat	E1_RT1D14.732F0001.xls	2	0.0615384	58.9081	0.892357	5.20778e-05	9.78624e-06
database_2014_07_01_Traj1_R_updatedGPeBorder.mat	E1_RT1D14.812F0001.xls	2	0.0350108	27.8688	0.872644	9.80115e-05	2.75684e-07
database_2014_07_01_Traj1_R_updatedGPeBorder.mat	E2_RT1D12.140F0001.xls	2	0.0493331	34.5068	0.944198	0.000113323	5.55551e-06
database_2014_07_01_Traj1_R_updatedGPeBorder.mat	E2_RT1D12.323F0001.xls	2	0.026656	30.0325	0.9558	6.32691e-05	1.53788e-06
database_2014_07_01_Traj1_R_updatedGPeBorder.mat	E2_RT1D12.511F0001.xls	2	0.0353797	29.5809	0.865469	8.02471e-05	2.23981e-07
database_2014_07_01_Traj1_R_updatedGPeBorder.mat	E2_RT1D12.889F0001.xls	2	0.608537	11.163	1.48911	0.000209777	6.40615e-07
database_2014_07_01_Traj1_R_updatedGPeBorder.mat	E2_RT1D13.079F0001.xls	2	0.0765088	53.8231	0.872876	9.1404e-05	1.66549e-07
database_2014_07_01_Traj1_R_updatedGPeBorder.mat	E2_RT1D13.529F0001.xls	2	0.108153	106.263	0.800931	0.000723216	7.26337e-08
database_2014_07_01_Traj1_R_updatedGPeBorder.mat	E2_RT1D13.748F0001.xls	2	0.0527678	36.2274	0.92266	0.000138705	1.14966e-07
database_2014_07_01_Traj1_R_updatedGPeBorder.mat	E2_RT1D13.996F0001.xls	2	0.11917	139.148	0.687888	0.00024285	6.5453e-07
database_2014_07_01_Traj1_R_updatedGPeBorder.mat	E2_RT1D14.131F0001.xls	2	0.0776547	35.496	0.914006	0.000217541	1.32e-06
database_2014_07_01_Traj1_R_updatedGPeBorder.mat	E2_RT1D14.261F0001.xls	2	0.0932273	56.1846	0.860544	9.33612e-05	1.39068e-07
database_2014_07_01_Traj1_R_updatedGPeBorder.mat	E2_RT1D14.473F0001.xls	2	0.602395	0.804554	1.87392	0.000675698	1.61236e-05
database_2014_07_01_Traj1_R_updatedGPeBorder.mat	E2_RT1D14.732F0001.xls	2	0.0517334	36.4058	0.903395	5.40221e-05	0.000335243
database_2014_07_01_Traj1_R_updatedGPeBorder.mat	E2_RT1D14.812F0001.xls	2	0.0377942	35.3213	0.871421	8.47477e-05	1.59503e-06
database_2014_07_01_Traj1_R_updatedGPeBorder.mat	E2_RT1D15.000F0001.xls	2	0.0281037	26.9416	0.937549	8.76503e-05	2.40987e-06
database_2014_07_01_Traj1_R_updatedGPeBorder.mat	E1_RT1D10.852F0001.xls	3	0.0508769	41.6934	0.850361	4.90669e-05	6.04726e-08
database_2014_07_01_Traj1_R_updatedGPeBorder.mat	E1_RT1D11.211F0001.xls	3	0.0557573	35.0433	0.941323	8.57137e-05	2.66952e-07
database_2014_07_01_Traj1_R_updatedGPeBorder.mat	E1_RT1D11.380F0001.xls	3	0.0488692	25.148	1.05692	0.000126305	1.21409e-06
database_2014_07_01_Traj1_R_updatedGPeBorder.mat	E1_RT1D11.727F0001.xls	3	0.505549	3.35478	1.62673	0.000212534	4.84731e-06
database_2014_07_01_Traj1_R_updatedGPeBorder.mat	E1_RT1D11.800F0001.xls	3	0.0470559	53.4231	0.909287	0.000151084	6.95875e-08
database_2014_07_01_Traj1_R_updatedGPeBorder.mat	E1_RT1D11.844F0001.xls	3	0.0530818	34.7959	0.907351	7.93376e-05	3.15671e-07
database_2014_07_01_Traj1_R_updatedGPeBorder.mat	E1_RT1D11.941F0001.xls	3	0.0468473	33.9831	1.00433	5.34821e-05	1.15625e-06
database_2014_07_01_Traj1_R_updatedGPeBorder.mat	E1_RT1D12.140F0001.xls	3	0.0491217	35.8318	1.01791	0.000143675	8.5586e-07
database_2014_07_01_Traj1_R_updatedGPeBorder.mat	E1_RT1D12.511F0001.xls	3	0.027446	36.4667	0.997512	0.00179769	4.50803e-09
database_2014_07_01_Traj1_R_updatedGPeBorder.mat	E1_RT1D12.889F0001.xls	3	0.0612726	51.7288	0.970482	8.97048e-05	5.32079e-08
database_2014_07_01_Traj1_R_updatedGPeBorder.mat	E1_RT1D13.529F0001.xls	3	0.842067	2.49279	2.98328	0.000251001	2.88695e-06
database_2014_07_01_Traj1_R_updatedGPeBorder.mat	E1_RT1D13.996F0001.xls	3	0.0544824	45.7946	0.905739	0.000139059	1.5849e-07
database_2014_07_01_Traj1_R_updatedGPeBorder.mat	E1_RT1D14.131F0001.xls	3	0.052152	51.926	0.943112	0.000207381	8.23175e-08
database_2014_07_01_Traj1_R_updatedGPeBorder.mat	E1_RT1D14.473F0001.xls	3	0.0438381	57.9303	0.885258	0.000103546	1.74217e-08
database_2014_07_01_Traj1_R_updatedGPeBorder.mat	E1_RT1D14.732F0001.xls	3	0.0288756	45.4934	1.04815	5.20778e-05	1.98655e-05
database_2014_07_01_Traj1_R_updatedGPeBorder.mat	E1_RT1D14.812F0001.xls	3	0.045263	27.8011	0.969515	9.80115e-05	3.18546e-07
database_2014_07_01_Traj1_R_updatedGPeBorder.mat	E2_RT1D12.140F0001.xls	3	0.0413135	36.9716	0.929059	0.000113323	5.81881e-06
database_2014_07_01_Traj1_R_updatedGPeBorder.mat	E2_RT1D12.323F0001.xls	3	0.0361039	45.1192	0.910882	6.32691e-05	5.83775e-07
database_2014_07_01_Traj1_R_updatedGPeBorder.mat	E2_RT1D12.511F0001.xls	3	0.0367414	38.5202	0.917384	8.02471e-05	1.50686e-07
database_2014_07_01_Traj1_R_updatedGPeBorder.mat	E2_RT1D13.079F0001.xls	3	0.0500468	54.9596	0.921752	9.1404e-05	1.39919e-07
database_2014_07_01_Traj1_R_updatedGPeBorder.mat	E2_RT1D13.748F0001.xls	3	0.0403173	44.5436	0.940324	0.000138705	7.13391e-08
database_2014_07_01_Traj1_R_updatedGPeBorder.mat	E2_RT1D14.131F0001.xls	3	0.0124685	8.87399	3.77646	0.000217541	6.6001e-05
database_2014_07_01_Traj1_R_updatedGPeBorder.mat	E2_RT1D14.261F0001.xls	3	0.0411851	53.0719	0.896274	9.33612e-05	2.09569e-07
database_2014_07_01_Traj1_R_updatedGPeBorder.mat	E2_RT1D14.473F0001.xls	3	0.0609826	70.9305	0.908704	0.000675698	2.32598e-07
database_2014_07_01_Traj1_R_updatedGPeBorder.mat	E2_RT1D14.732F0001.xls	3	0.0238338	32.0371	1.03862	5.40221e-05	0.000167797
database_2014_07_01_Traj1_R_updatedGPeBorder.mat	E2_RT1D14.812F0001.xls	3	0.0320134	42.3584	0.92657	8.47477e-05	1.57959e-06
database_2014_07_01_Traj1_R_updatedGPeBorder.mat	E2_RT1D15.000F0001.xls	3	0.81107	1.03181	2.3052	8.76503e-05	1.73267e-05
database_2014_07_01_Traj1_R_updatedGPeBorder.mat	E1_RT1D10.852F0001.xls	4	0.0282636	34.0297	0.971013	4.90669e-05	7.3774e-08
database_2014_07_01_Traj1_R_updatedGPeBorder.mat	E1_RT1D11.211F0001.xls	4	0.0247709	32.4539	1.00986	8.57137e-05	3.39209e-07
database_2014_07_01_Traj1_R_updatedGPeBorder.mat	E1_RT1D11.380F0001.xls	4	0.0381337	31.435	0.963614	0.000126305	6.69261e-07
database_2014_07_01_Traj1_R_updatedGPeBorder.mat	E1_RT1D11.727F0001.xls	4	0.0481668	31.214	0.978553	0.000212534	6.1552e-07
database_2014_07_01_Traj1_R_updatedGPeBorder.mat	E1_RT1D11.844F0001.xls	4	0.0374947	27.8901	1.00447	7.93376e-05	5.67431e-07
database_2014_07_01_Traj1_R_updatedGPeBorder.mat	E1_RT1D11.941F0001.xls	4	0.0325794	35.2786	0.94437	5.34821e-05	9.54185e-07
database_2014_07_01_Traj1_R_updatedGPeBorder.mat	E1_RT1D12.140F0001.xls	4	0.0221444	21.3449	1.02147	0.000143675	1.52372e-06
database_2014_07_01_Traj1_R_updatedGPeBorder.mat	E1_RT1D13.529F0001.xls	4	0.0390885	40.7584	0.940144	0.000251001	3.1261e-08
database_2014_07_01_Traj1_R_updatedGPeBorder.mat	E1_RT1D13.996F0001.xls	4	0.0206594	23.5596	0.964754	0.000139059	1.45247e-07
database_2014_07_01_Traj1_R_updatedGPeBorder.mat	E1_RT1D14.812F0001.xls	4	0.0246817	28.207	0.954996	9.80115e-05	4.06611e-07
database_2014_07_01_Traj1_R_updatedGPeBorder.mat	E2_RT1D12.140F0001.xls	4	0.0269725	32.1191	0.907548	0.000113323	3.44136e-06
database_2014_07_01_Traj1_R_updatedGPeBorder.mat	E2_RT1D12.323F0001.xls	4	0.0239262	32.7114	0.966108	6.32691e-05	8.65551e-07
database_2014_07_01_Traj1_R_updatedGPeBorder.mat	E2_RT1D12.511F0001.xls	4	0.0229494	29.1746	0.885792	8.02471e-05	3.72158e-07
database_2014_07_01_Traj1_R_updatedGPeBorder.mat	E2_RT1D13.748F0001.xls	4	0.0265403	35.1165	0.953159	0.000138705	2.79514e-07
database_2014_07_01_Traj1_R_updatedGPeBorder.mat	E2_RT1D14.131F0001.xls	4	0.0329252	26.622	1.1259	0.000217541	1.73268e-06
database_2014_07_01_Traj1_R_updatedGPeBorder.mat	E2_RT1D15.000F0001.xls	4	0.0297639	24.7175	0.989336	8.76503e-05	2.25931e-06
database_2014_07_01_Traj1_R_updatedGPeBorder.mat	E1_RT1D11.380F0001.xls	5	0.0173734	24.6152	0.981935	0.000126305	1.11484e-06
database_2014_07_01_Traj1_R_updatedGPeBorder.mat	E1_RT1D11.727F0001.xls	5	0.0358299	46.7627	0.96	0.000212534	1.23146e-07
database_2014_07_01_Traj1_R_updatedGPeBorder.mat	E1_RT1D14.812F0001.xls	5	0.678467	0.676427	1.36251	9.80115e-05	1.26538e-05
database_2014_07_01_Traj1_R_updatedGPeBorder.mat	E2_RT1D13.748F0001.xls	5	0.0320392	0.108003	0.812057	0.000138705	6.79633e-05
database_2014_07_01_Traj1_R_updatedGPeBorder.mat	E2_RT1D14.131F0001.xls	5	0.0321547	10.595	2.52236	0.000217541	1.14875e-05
database_2014_07_01_Traj1_R_updatedGPeBorder.mat	E2_RT1D15.000F0001.xls	5	0.0240854	31.4586	0.973176	8.76503e-05	1.33404e-06
database_2016_07_13_Traj1_R.mat	E1_RT1D11.840F0001.xls	1	0.0531282	48.8036	0.997945	5.72063e-05	1.749e-07
database_2016_07_13_Traj1_R.mat	E1_RT1D11.977F0001.xls	1	0.0474296	40.8677	0.985734	6.02733e-05	8.37282e-08
database_2016_07_13_Traj1_R.mat	E1_RT1D12.487F0003.xls	1	0.0260578	20.8961	0.950126	3.3706e-05	5.456e-08
database_2016_07_13_Traj1_R.mat	E1_RT1D12.616F0001.xls	1	0.051601	33.0472	0.955087	7.9322e-05	4.51665e-07
database_2016_07_13_Traj1_R.mat	E1_RT1D12.858F0001.xls	1	0.0939051	61.1089	0.947446	8.08071e-05	1.26298e-07
database_2016_07_13_Traj1_R.mat	E1_RT1D14.538F0001.xls	1	0.0502845	45.9913	0.837894	7.51954e-05	9.43376e-07
database_2016_07_13_Traj1_R.mat	E1_RT1D15.000F0001.xls	1	0.0485992	53.5767	0.897487	0.000136473	7.66467e-09
database_2016_07_13_Traj1_R.mat	E2_RT1D11.347F0001.xls	1	0.0490111	51.2838	0.892883	7.42303e-05	7.13446e-08
database_2016_07_13_Traj1_R.mat	E2_RT1D11.840F0001.xls	1	0.0554527	67.5621	0.893466	0.000354983	2.51898e-08
database_2016_07_13_Traj1_R.mat	E2_RT1D11.977F0001.xls	1	0.425972	29.3543	1.54107	0.000392574	5.23601e-07
database_2016_07_13_Traj1_R.mat	E2_RT1D12.487F0003.xls	1	0.0424265	29.945	0.899745	5.93474e-05	1.46666e-07
database_2016_07_13_Traj1_R.mat	E2_RT1D12.616F0001.xls	1	0.0336984	44.497	1.00063	7.05582e-05	5.70978e-07
database_2016_07_13_Traj1_R.mat	E2_RT1D12.858F0001.xls	1	0.507587	17.9488	2.32184	0.000979387	6.80945e-08
database_2016_07_13_Traj1_R.mat	E2_RT1D14.538F0001.xls	1	0.0502934	42.7664	0.896882	0.000139835	1.00787e-06
database_2016_07_13_Traj1_R.mat	E2_RT1D15.000F0001.xls	1	0.0702046	34.0493	0.936079	0.000301714	1.6823e-08
database_2016_07_13_Traj1_R.mat	E1_RT1D11.840F0001.xls	2	0.0525796	32.5357	0.904282	5.72063e-05	2.65065e-07
database_2016_07_13_Traj1_R.mat	E1_RT1D11.977F0001.xls	2	0.0452337	41.7275	0.881216	6.02733e-05	2.19052e-07
database_2016_07_13_Traj1_R.mat	E1_RT1D12.487F0003.xls	2	0.0436328	25.7657	0.991239	3.3706e-05	2.2589e-08
database_2016_07_13_Traj1_R.mat	E1_RT1D12.616F0001.xls	2	0.0214861	28.9729	0.826586	7.9322e-05	8.66289e-07
database_2016_07_13_Traj1_R.mat	E1_RT1D12.858F0001.xls	2	0.058794	58.5565	0.946274	8.08071e-05	1.00757e-07
database_2016_07_13_Traj1_R.mat	E1_RT1D14.538F0001.xls	2	0.0466598	41.8325	0.866124	7.51954e-05	1.05662e-06
database_2016_07_13_Traj1_R.mat	E1_RT1D15.000F0001.xls	2	0.0773526	57.142	0.890439	0.000136473	1.79066e-08
database_2016_07_13_Traj1_R.mat	E2_RT1D11.347F0001.xls	2	0.0518283	40.1789	0.964283	7.42303e-05	5.83282e-08
database_2016_07_13_Traj1_R.mat	E2_RT1D11.840F0001.xls	2	0.0629044	59.9675	0.893909	0.000354983	2.46631e-08
database_2016_07_13_Traj1_R.mat	E2_RT1D11.977F0001.xls	2	0.0945216	89.4962	0.865578	0.000392574	1.11969e-07
database_2016_07_13_Traj1_R.mat	E2_RT1D12.487F0003.xls	2	0.0258925	17.8071	0.937194	5.93474e-05	2.35798e-07
database_2016_07_13_Traj1_R.mat	E2_RT1D12.616F0001.xls	2	0.0484572	29.2624	0.954781	7.05582e-05	4.62552e-07
database_2016_07_13_Traj1_R.mat	E2_RT1D12.858F0001.xls	2	0.12222	123.614	0.783032	0.000979387	9.67429e-08
database_2016_07_13_Traj1_R.mat	E2_RT1D14.538F0001.xls	2	0.0524188	42.522	0.823656	0.000139835	6.42391e-07
database_2016_07_13_Traj1_R.mat	E2_RT1D15.000F0001.xls	2	0.0281281	23.7052	0.957302	0.000301714	1.77686e-08
database_2016_07_13_Traj1_R.mat	E1_RT1D11.840F0001.xls	3	0.0465051	45.7472	0.94181	5.72063e-05	1.83813e-07
database_2016_07_13_Traj1_R.mat	E1_RT1D11.977F0001.xls	3	0.0480566	35.3652	0.935851	6.02733e-05	4.23107e-08
database_2016_07_13_Traj1_R.mat	E1_RT1D12.487F0003.xls	3	0.0227096	22.7494	0.960843	3.3706e-05	2.5731e-08
database_2016_07_13_Traj1_R.mat	E1_RT1D12.616F0001.xls	3	0.0266658	21.7297	0.976634	7.9322e-05	7.82419e-07
database_2016_07_13_Traj1_R.mat	E1_RT1D12.858F0001.xls	3	0.0666022	54.8779	1.01852	8.08071e-05	2.1465e-07
database_2016_07_13_Traj1_R.mat	E1_RT1D14.538F0001.xls	3	0.0353055	23.2403	0.803894	7.51954e-05	7.00286e-07
database_2016_07_13_Traj1_R.mat	E1_RT1D15.000F0001.xls	3	0.0734554	51.4807	0.922548	0.000136473	4.71267e-09
database_2016_07_13_Traj1_R.mat	E2_RT1D11.347F0001.xls	3	0.0580723	50.628	0.901562	7.42303e-05	7.45015e-08
database_2016_07_13_Traj1_R.mat	E2_RT1D11.840F0001.xls	3	0.344922	2.16988	1.21264	0.000354983	9.74747e-07
database_2016_07_13_Traj1_R.mat	E2_RT1D11.977F0001.xls	3	0.616282	3.21062	2.85192	0.000392574	5.57685e-06
database_2016_07_13_Traj1_R.mat	E2_RT1D12.487F0003.xls	3	0.0293476	25.257	0.88685	5.93474e-05	9.8113e-08
database_2016_07_13_Traj1_R.mat	E2_RT1D12.616F0001.xls	3	0.0608788	44.0445	0.857111	7.05582e-05	6.15756e-07
database_2016_07_13_Traj1_R.mat	E2_RT1D14.538F0001.xls	3	0.0424706	48.8759	0.928304	0.000139835	1.25298e-06
database_2016_07_13_Traj1_R.mat	E2_RT1D15.000F0001.xls	3	0.659293	1.01874	1.64237	0.000301714	4.15286e-07
database_2016_07_13_Traj1_R.mat	E1_RT1D11.840F0001.xls	4	0.0341733	35.0991	0.938054	5.72063e-05	2.32341e-07
database_2016_07_13_Traj1_R.mat	E1_RT1D11.977F0001.xls	4	0.0447996	33.5883	0.94118	6.02733e-05	6.3407e-08
database_2016_07_13_Traj1_R.mat	E1_RT1D12.616F0001.xls	4	0.0274825	36.0652	0.915994	7.9322e-05	8.29986e-07
database_2016_07_13_Traj1_R.mat	E1_RT1D14.538F0001.xls	4	0.0207714	30.3347	1.01051	7.51954e-05	6.65113e-07
database_2016_07_13_Traj1_R.mat	E2_RT1D11.347F0001.xls	4	0.0324901	35.8506	0.954343	7.42303e-05	1.09492e-07
database_2016_07_13_Traj1_R.mat	E2_RT1D11.840F0001.xls	4	0.121538	36.8879	1.07174	0.000354983	1.69924e-07
database_2016_07_13_Traj1_R.mat	E2_RT1D12.616F0001.xls	4	0.0404538	35.5976	0.95303	7.05582e-05	5.80457e-07
database_2016_07_13_Traj1_R.mat	E2_RT1D15.000F0001.xls	4	0.0415396	26.2129	0.923251	0.000301714	2.51299e-08
database_2016_07_13_Traj1_R.mat	E2_RT1D15.000F0001.xls	5	0.0256692	36.8312	0.965735	0.000301714	2.37217e-08
database_2016_07_13_Traj2_L.mat	E1_LT1D14.021F0001.xls	1	0.805274	58.9762	1.15926	0.000166276	2.34674e-08
database_2016_07_13_Traj2_L.mat	E1_LT1D14.230F0001.xls	1	0.124382	103.76	0.802055	0.00498148	4.1177e-08
database_2016_07_13_Traj2_L.mat	E1_LT1D14.432F0001.xls	1	0.0670615	66.1094	0.845468	0.000218589	3.94568e-07
database_2016_07_13_Traj2_L.mat	E1_LT1D14.623F0001.xls	1	0.0661536	53.7384	0.940636	6.17583e-05	7.30926e-07
database_2016_07_13_Traj2_L.mat	E1_LT1D15.008F0001.xls	1	0.0418838	51.7721	0.895411	5.78642e-05	3.079e-08
database_2016_07_13_Traj2_L.mat	E2_LT1D12.498F0001.xls	1	0.25202	63.7425	0.927751	0.000113949	9.06551e-07
database_2016_07_13_Traj2_L.mat	E2_LT1D12.892F0001.xls	1	0.266495	59.8098	0.963588	0.000137353	9.80229e-08
database_2016_07_13_Traj2_L.mat	E2_LT1D13.307F0001.xls	1	0.343294	61.6581	0.887298	0.000167895	6.99703e-08
database_2016_07_13_Traj2_L.mat	E2_LT1D13.457F0001.xls	1	0.0815926	42.8987	0.884271	0.00011878	7.04352e-07
database_2016_07_13_Traj2_L.mat	E2_LT1D13.907F0001.xls	1	0.0442673	45.239	0.856496	7.52204e-05	2.31462e-07
database_2016_07_13_Traj2_L.mat	E2_LT1D14.021F0001.xls	1	0.0858093	74.634	0.856059	0.000223126	5.24789e-09
database_2016_07_13_Traj2_L.mat	E2_LT1D14.230F0001.xls	1	0.110451	115.885	0.74232	0.00615035	3.42012e-08
database_2016_07_13_Traj2_L.mat	E2_LT1D14.432F0001.xls	1	0.0555644	57.5687	0.920174	9.88983e-05	4.02926e-07
database_2016_07_13_Traj2_L.mat	E2_LT1D14.623F0001.xls	1	0.0556006	41.0005	0.936376	0.000113999	8.168e-07
database_2016_07_13_Traj2_L.mat	E2_LT1D15.008F0001.xls	1	0.050212	44.7762	0.926211	8.45866e-05	1.76303e-07
database_2016_07_13_Traj2_L.mat	E1_LT1D14.021F0001.xls	2	0.121889	90.6301	0.844169	0.000166276	1.99722e-08
database_2016_07_13_Traj2_L.mat	E1_LT1D14.432F0001.xls	2	0.0262639	38.3042	0.995849	0.000218589	3.38332e-07
database_2016_07_13_Traj2_L.mat	E1_LT1D14.623F0001.xls	2	0.0614769	52.0849	1.05814	6.17583e-05	7.96952e-07
database_2016_07_13_Traj2_L.mat	E1_LT1D15.008F0001.xls	2	0.0449912	40.2034	0.939698	5.78642e-05	3.54843e-08
database_2016_07_13_Traj2_L.mat	E2_LT1D12.498F0001.xls	2	0.0550257	60.4434	0.87181	0.000113949	6.16893e-07
database_2016_07_13_Traj2_L.mat	E2_LT1D12.892F0001.xls	2	0.0646347	55.9417	0.943617	0.000137353	1.22679e-07
database_2016_07_13_Traj2_L.mat	E2_LT1D13.307F0001.xls	2	0.105963	93.0402	0.848158	0.000167895	4.7642e-08
database_2016_07_13_Traj2_L.mat	E2_LT1D13.457F0001.xls	2	0.120742	43.4115	0.897485	0.00011878	1.12048e-06
database_2016_07_13_Traj2_L.mat	E2_LT1D13.907F0001.xls	2	0.0293314	30.8062	1.00632	7.52204e-05	3.17443e-07
database_2016_07_13_Traj2_L.mat	E2_LT1D14.021F0001.xls	2	0.0689381	57.0324	0.933624	0.000223126	1.11719e-08
database_2016_07_13_Traj2_L.mat	E2_LT1D14.432F0001.xls	2	0.0533384	26.9961	0.952547	9.88983e-05	2.25564e-07
database_2016_07_13_Traj2_L.mat	E2_LT1D14.623F0001.xls	2	0.0762613	50.2587	0.818713	0.000113999	6.83822e-07
database_2016_07_13_Traj2_L.mat	E2_LT1D15.008F0001.xls	2	0.0506597	41.6643	0.939374	8.45866e-05	1.64086e-07
database_2016_07_13_Traj2_L.mat	E1_LT1D14.432F0001.xls	3	0.0512736	21.2288	0.921667	0.000218589	5.22914e-07
database_2016_07_13_Traj2_L.mat	E1_LT1D14.623F0001.xls	3	0.0431775	42.66	0.878061	6.17583e-05	6.35408e-07
database_2016_07_13_Traj2_L.mat	E1_LT1D15.008F0001.xls	3	0.0439685	47.9058	0.923133	5.78642e-05	4.44416e-08
database_2016_07_13_Traj2_L.mat	E2_LT1D13.457F0001.xls	3	0.0530431	34.3532	0.971368	0.00011878	8.72222e-07
database_2016_07_13_Traj2_L.mat	E2_LT1D13.907F0001.xls	3	0.0627875	50.2117	0.905382	7.52204e-05	3.9667e-07
database_2016_07_13_Traj2_L.mat	E2_LT1D14.432F0001.xls	3	0.0543556	48.1085	0.926343	9.88983e-05	2.10992e-07
database_2016_07_13_Traj2_L.mat	E2_LT1D14.623F0001.xls	3	0.046709	53.8958	0.97785	0.000113999	7.84784e-07
database_2016_07_13_Traj2_L.mat	E2_LT1D15.008F0001.xls	3	0.0407609	45.2597	0.911227	8.45866e-05	1.38207e-07
database_2016_07_13_Traj2_L.mat	E1_LT1D14.623F0001.xls	4	0.0240137	32.5737	0.865678	6.17583e-05	8.19215e-07
database_2016_07_13_Traj2_L.mat	E1_LT1D15.008F0001.xls	4	0.0286685	43.8885	0.942283	5.78642e-05	6.00813e-08
database_2016_07_13_Traj2_L.mat	E2_LT1D13.907F0001.xls	4	0.0573191	37.2343	0.815029	7.52204e-05	2.87851e-07
database_2016_07_13_Traj2_L.mat	E2_LT1D14.432F0001.xls	4	0.0341287	34.4951	0.958309	9.88983e-05	3.98053e-07
database_2016_07_17_Traj1_R_updatedGPeBorder.mat	E1_RT1D14.244F0001.xls	1	0.0734728	35.7591	1.03332	7.09753e-05	2.01228e-07
database_2016_07_17_Traj1_R_updatedGPeBorder.mat	E1_RT1D14.596F0001.xls	1	0.10189	51.897	0.796815	0.000243143	1.08231e-05
database_2016_07_17_Traj1_R_updatedGPeBorder.mat	E1_RT1D14.697F0001.xls	1	0.0854345	54.8969	0.82679	7.52349e-05	2.39858e-06
database_2016_07_17_Traj1_R_updatedGPeBorder.mat	E1_RT1D14.899F0001.xls	1	0.0278726	37.8527	0.882858	9.70625e-05	4.37042e-06
database_2016_07_17_Traj1_R_updatedGPeBorder.mat	E2_RT1D10.605F0001.xls	1	0.530451	53.9692	0.946143	0.000268917	6.09498e-08
database_2016_07_17_Traj1_R_updatedGPeBorder.mat	E2_RT1D11.198F0001.xls	1	0.0450995	38.9763	0.881387	0.000123233	2.83032e-07
database_2016_07_17_Traj1_R_updatedGPeBorder.mat	E2_RT1D11.395F0001.xls	1	0.0868943	39.7384	0.910713	0.000191204	8.22009e-07
database_2016_07_17_Traj1_R_updatedGPeBorder.mat	E2_RT1D11.591F0001.xls	1	0.536183	34.6332	0.955922	0.00014533	2.42106e-08
database_2016_07_17_Traj1_R_updatedGPeBorder.mat	E2_RT1D11.932F0001.xls	1	0.0717843	34.3656	0.894729	6.88208e-05	9.59357e-08
database_2016_07_17_Traj1_R_updatedGPeBorder.mat	E2_RT1D12.104F0001.xls	1	0.045233	43.4894	0.900811	0.000110637	2.43323e-06
database_2016_07_17_Traj1_R_updatedGPeBorder.mat	E2_RT1D12.457F0001.xls	1	0.0747908	40.9893	0.935441	8.12228e-05	8.21771e-08
database_2016_07_17_Traj1_R_updatedGPeBorder.mat	E2_RT1D13.055F0001.xls	1	0.0825105	46.9402	0.938643	6.84315e-05	3.2678e-07
database_2016_07_17_Traj1_R_updatedGPeBorder.mat	E2_RT1D13.255F0001.xls	1	0.0605635	45.4686	0.848777	4.80442e-05	6.75717e-07
database_2016_07_17_Traj1_R_updatedGPeBorder.mat	E2_RT1D13.387F0001.xls	1	0.0960113	49.6353	0.846552	5.79535e-05	1.48627e-07
database_2016_07_17_Traj1_R_updatedGPeBorder.mat	E2_RT1D13.543F0001.xls	1	0.0764163	60.6337	0.818933	5.81152e-05	4.49728e-07
database_2016_07_17_Traj1_R_updatedGPeBorder.mat	E2_RT1D13.667F0001.xls	1	0.0994462	64.0601	0.857599	5.55305e-05	1.63686e-07
database_2016_07_17_Traj1_R_updatedGPeBorder.mat	E2_RT1D13.785F0001.xls	1	0.0918737	58.8699	0.877846	4.77945e-05	4.70942e-07
database_2016_07_17_Traj1_R_updatedGPeBorder.mat	E2_RT1D13.991F0001.xls	1	0.0723453	45.775	0.880023	4.77214e-05	2.33853e-06
database_2016_07_17_Traj1_R_updatedGPeBorder.mat	E2_RT1D14.110F0001.xls	1	0.0690005	63.1243	0.882388	5.61533e-05	1.51626e-07
database_2016_07_17_Traj1_R_updatedGPeBorder.mat	E2_RT1D14.244F0001.xls	1	0.082272	59.9097	0.76519	0.00028204	1.57582e-06
database_2016_07_17_Traj1_R_updatedGPeBorder.mat	E2_RT1D14.596F0001.xls	1	0.0595666	50.3081	0.90248	0.000261748	9.74435e-05
database_2016_07_17_Traj1_R_updatedGPeBorder.mat	E2_RT1D14.697F0001.xls	1	0.15114	86.0355	0.710912	5.343e-05	1.90416e-06
database_2016_07_17_Traj1_R_updatedGPeBorder.mat	E2_RT1D14.899F0001.xls	1	0.108115	41.0077	0.860046	7.38318e-05	5.38078e-06
database_2016_07_17_Traj1_R_updatedGPeBorder.mat	E1_RT1D14.244F0001.xls	2	0.0438746	39.7908	0.946486	7.09753e-05	2.19859e-07
database_2016_07_17_Traj1_R_updatedGPeBorder.mat	E1_RT1D14.596F0001.xls	2	0.0467472	38.1219	0.871545	0.000243143	4.95993e-06
database_2016_07_17_Traj1_R_updatedGPeBorder.mat	E1_RT1D14.697F0001.xls	2	0.0337219	25.4094	0.991678	7.52349e-05	6.72437e-06
database_2016_07_17_Traj1_R_updatedGPeBorder.mat	E1_RT1D14.899F0001.xls	2	0.0769628	39.1145	0.847926	9.70625e-05	3.06216e-06
database_2016_07_17_Traj1_R_updatedGPeBorder.mat	E2_RT1D10.605F0001.xls	2	0.116312	74.611	0.795079	0.000268917	2.04254e-08
database_2016_07_17_Traj1_R_updatedGPeBorder.mat	E2_RT1D11.198F0001.xls	2	0.0995959	22.3872	0.97428	0.000123233	2.36191e-06
database_2016_07_17_Traj1_R_updatedGPeBorder.mat	E2_RT1D11.395F0001.xls	2	0.101406	73.2298	0.805934	0.000191204	8.36691e-07
database_2016_07_17_Traj1_R_updatedGPeBorder.mat	E2_RT1D11.591F0001.xls	2	0.111711	93.762	0.748682	0.00014533	3.56618e-08
database_2016_07_17_Traj1_R_updatedGPeBorder.mat	E2_RT1D11.932F0001.xls	2	0.0567041	32.6354	0.862555	6.88208e-05	8.26763e-08
database_2016_07_17_Traj1_R_updatedGPeBorder.mat	E2_RT1D12.104F0001.xls	2	0.0988065	32.4548	0.831411	0.000110637	2.1094e-06
database_2016_07_17_Traj1_R_updatedGPeBorder.mat	E2_RT1D12.457F0001.xls	2	0.0362001	26.002	0.907703	8.12228e-05	7.81284e-08
database_2016_07_17_Traj1_R_updatedGPeBorder.mat	E2_RT1D13.055F0001.xls	2	0.0387443	37.7613	0.899102	6.84315e-05	3.44112e-07
database_2016_07_17_Traj1_R_updatedGPeBorder.mat	E2_RT1D13.255F0001.xls	2	0.0397239	32.7619	0.813585	4.80442e-05	7.15454e-07
database_2016_07_17_Traj1_R_updatedGPeBorder.mat	E2_RT1D13.387F0001.xls	2	0.022059	30.0858	0.984489	5.79535e-05	3.11567e-07
database_2016_07_17_Traj1_R_updatedGPeBorder.mat	E2_RT1D13.543F0001.xls	2	0.0445459	35.4446	0.97831	5.81152e-05	7.84787e-07
database_2016_07_17_Traj1_R_updatedGPeBorder.mat	E2_RT1D13.667F0001.xls	2	0.0389378	32.8688	0.923122	5.55305e-05	6.69435e-07
database_2016_07_17_Traj1_R_updatedGPeBorder.mat	E2_RT1D13.785F0001.xls	2	0.039813	39.326	0.966693	4.77945e-05	6.48826e-07
database_2016_07_17_Traj1_R_updatedGPeBorder.mat	E2_RT1D13.991F0001.xls	2	0.081453	30.806	0.897131	4.77214e-05	3.29242e-06
database_2016_07_17_Traj1_R_updatedGPeBorder.mat	E2_RT1D14.110F0001.xls	2	0.116355	42.8112	0.803829	5.61533e-05	9.97276e-08
database_2016_07_17_Traj1_R_updatedGPeBorder.mat	E2_RT1D14.244F0001.xls	2	0.0605998	23.123	0.879739	0.00028204	2.95384e-06
database_2016_07_17_Traj1_R_updatedGPeBorder.mat	E2_RT1D14.596F0001.xls	2	0.0725754	27.5573	0.77062	0.000261748	0.000171367
database_2016_07_17_Traj1_R_updatedGPeBorder.mat	E2_RT1D14.697F0001.xls	2	0.0969969	57.6688	0.748298	5.343e-05	2.32382e-06
database_2016_07_17_Traj1_R_updatedGPeBorder.mat	E2_RT1D14.899F0001.xls	2	0.0971922	81.7	0.682409	7.38318e-05	2.76742e-06
database_2016_07_17_Traj1_R_updatedGPeBorder.mat	E1_RT1D14.244F0001.xls	3	0.11261	29.0981	0.828263	7.09753e-05	1.79954e-07
database_2016_07_17_Traj1_R_updatedGPeBorder.mat	E1_RT1D14.596F0001.xls	3	0.0926719	32.9962	0.9163	0.000243143	2.024e-05
database_2016_07_17_Traj1_R_updatedGPeBorder.mat	E1_RT1D14.697F0001.xls	3	0.0595311	24.1546	0.766311	7.52349e-05	7.49993e-06
database_2016_07_17_Traj1_R_updatedGPeBorder.mat	E1_RT1D14.899F0001.xls	3	0.0900124	45.1078	0.978275	9.70625e-05	1.41779e-06
database_2016_07_17_Traj1_R_updatedGPeBorder.mat	E2_RT1D11.198F0001.xls	3	0.112717	39.6205	0.89005	0.000123233	9.45092e-07
database_2016_07_17_Traj1_R_updatedGPeBorder.mat	E2_RT1D11.932F0001.xls	3	0.0362643	15.2139	0.995426	6.88208e-05	1.20628e-07
database_2016_07_17_Traj1_R_updatedGPeBorder.mat	E2_RT1D12.104F0001.xls	3	0.119302	55.3895	0.841404	0.000110637	1.45691e-06
database_2016_07_17_Traj1_R_updatedGPeBorder.mat	E2_RT1D12.457F0001.xls	3	0.0897982	20.9461	1.07073	8.12228e-05	8.37907e-08
database_2016_07_17_Traj1_R_updatedGPeBorder.mat	E2_RT1D13.055F0001.xls	3	0.184442	48.683	0.785481	6.84315e-05	2.72302e-07
database_2016_07_17_Traj1_R_updatedGPeBorder.mat	E2_RT1D13.255F0001.xls	3	0.0566981	16.0748	0.875697	4.80442e-05	9.16551e-07
database_2016_07_17_Traj1_R_updatedGPeBorder.mat	E2_RT1D13.387F0001.xls	3	0.22753	39.2258	0.761137	5.79535e-05	1.64638e-07
database_2016_07_17_Traj1_R_updatedGPeBorder.mat	E2_RT1D13.543F0001.xls	3	0.10018	27.2582	0.854143	5.81152e-05	1.30129e-06
database_2016_07_17_Traj1_R_updatedGPeBorder.mat	E2_RT1D13.667F0001.xls	3	0.0979049	30.0126	0.834343	5.55305e-05	2.61458e-07
database_2016_07_17_Traj1_R_updatedGPeBorder.mat	E2_RT1D13.785F0001.xls	3	0.0908775	26.0982	0.818417	4.77945e-05	7.56608e-07
database_2016_07_17_Traj1_R_updatedGPeBorder.mat	E2_RT1D13.991F0001.xls	3	0.137771	38.6159	0.770303	4.77214e-05	2.25577e-06
database_2016_07_17_Traj1_R_updatedGPeBorder.mat	E2_RT1D14.110F0001.xls	3	0.144825	70.635	0.781734	5.61533e-05	7.34507e-08
database_2016_07_17_Traj1_R_updatedGPeBorder.mat	E2_RT1D14.244F0001.xls	3	0.0953399	52.3772	0.869754	0.00028204	2.45213e-06
database_2016_07_17_Traj1_R_updatedGPeBorder.mat	E2_RT1D14.596F0001.xls	3	0.126216	46.4629	0.858488	0.000261748	0.000103796
database_2016_07_17_Traj1_R_updatedGPeBorder.mat	E2_RT1D14.697F0001.xls	3	0.0549916	49.564	0.853248	5.343e-05	2.16175e-06
database_2016_07_17_Traj1_R_updatedGPeBorder.mat	E1_RT1D14.244F0001.xls	4	0.0592147	21.0348	0.931671	7.09753e-05	2.50873e-07
database_2016_07_17_Traj1_R_updatedGPeBorder.mat	E1_RT1D14.596F0001.xls	4	0.107725	16.6583	1.09055	0.000243143	5.37287e-05
database_2016_07_17_Traj1_R_updatedGPeBorder.mat	E1_RT1D14.697F0001.xls	4	0.163242	33.5655	0.682233	7.52349e-05	8.87295e-06
database_2016_07_17_Traj1_R_updatedGPeBorder.mat	E2_RT1D11.198F0001.xls	4	0.0657654	43.647	0.910212	0.000123233	4.96103e-07
database_2016_07_17_Traj1_R_updatedGPeBorder.mat	E2_RT1D11.932F0001.xls	4	0.127012	30.6069	0.896327	6.88208e-05	8.61062e-08
database_2016_07_17_Traj1_R_updatedGPeBorder.mat	E2_RT1D12.457F0001.xls	4	0.119524	37.7391	0.84179	8.12228e-05	5.71393e-08
database_2016_07_17_Traj1_R_updatedGPeBorder.mat	E2_RT1D13.255F0001.xls	4	0.136205	37.2016	0.765718	4.80442e-05	7.18729e-07
database_2016_07_17_Traj1_R_updatedGPeBorder.mat	E2_RT1D13.387F0001.xls	4	0.0547055	24.9446	0.905186	5.79535e-05	4.37651e-07
database_2016_07_17_Traj1_R_updatedGPeBorder.mat	E2_RT1D13.543F0001.xls	4	0.114452	52.4472	0.742708	5.81152e-05	5.37736e-07
database_2016_07_17_Traj1_R_updatedGPeBorder.mat	E2_RT1D13.667F0001.xls	4	0.152423	57.1237	0.778177	5.55305e-05	9.78935e-08
database_2016_07_17_Traj1_R_updatedGPeBorder.mat	E2_RT1D13.785F0001.xls	4	0.1341	51.3622	0.781189	4.77945e-05	5.27758e-07
database_2016_07_17_Traj1_R_updatedGPeBorder.mat	E2_RT1D14.244F0001.xls	4	0.0168091	20.4954	0.796054	0.00028204	7.40569e-06
database_2016_07_17_Traj1_R_updatedGPeBorder.mat	E2_RT1D14.596F0001.xls	4	0.0234904	21.1486	1.05357	0.000261748	0.000181367
database_2016_07_17_Traj1_R_updatedGPeBorder.mat	E1_RT1D14.697F0001.xls	5	0.0399652	34.1929	1.1026	7.52349e-05	5.73306e-06
database_2016_07_17_Traj2_L.mat	E1_LT1D10.152F0001.xls	1	0.0368859	37.427	0.936632	6.64159e-05	1.0258e-06
database_2016_07_17_Traj2_L.mat	E1_LT1D10.452F0001.xls	1	0.0322971	36.3131	1.08082	0.000322393	2.07407e-07
database_2016_07_17_Traj2_L.mat	E1_LT1D10.854F0001.xls	1	0.0451358	43.1945	0.907025	9.86203e-05	9.22203e-08
database_2016_07_17_Traj2_L.mat	E1_LT1D11.659F0001.xls	1	0.088546	41.7064	0.908851	9.08364e-05	8.40611e-08
database_2016_07_17_Traj2_L.mat	E1_LT1D12.263F0001.xls	1	0.116194	20.1367	1.50104	0.000612731	5.23984e-07
database_2016_07_17_Traj2_L.mat	E1_LT1D12.667F0001.xls	1	0.142188	41.3236	0.924061	0.000282436	1.28978e-07
database_2016_07_17_Traj2_L.mat	E1_LT1D13.070F0001.xls	1	0.129467	58.1027	0.846028	0.00048294	3.24242e-08
database_2016_07_17_Traj2_L.mat	E1_LT1D13.272F0001.xls	1	0.581605	9.9461	1.23682	0.00111808	2.38531e-06
database_2016_07_17_Traj2_L.mat	E1_LT1D13.839F0001.xls	1	0.389231	13.9858	1.78344	0.000701968	6.90645e-08
database_2016_07_17_Traj2_L.mat	E1_LT1D13.976F0001.xls	1	0.484575	23.4066	3.30812	0.000328502	6.70758e-07
database_2016_07_17_Traj2_L.mat	E1_LT1D14.036F0001.xls	1	0.102498	39.4357	0.902102	0.000818914	3.49758e-07
database_2016_07_17_Traj2_L.mat	E1_LT1D14.184F0001.xls	1	0.606117	4.29187	1.63501	0.00103468	5.78243e-06
database_2016_07_17_Traj2_L.mat	E1_LT1D14.337F0001.xls	1	0.207207	65.8751	1.1931	0.000919278	7.6795e-08
database_2016_07_17_Traj2_L.mat	E1_LT1D14.599F0001.xls	1	0.599842	56.9233	2.00181	0.00097303	3.58029e-07
database_2016_07_17_Traj2_L.mat	E1_LT1D14.696F0001.xls	1	0.63467	41.0817	1.1904	0.00132167	5.71364e-07
database_2016_07_17_Traj2_L.mat	E1_LT1D14.797F0001.xls	1	0.058714	27.5358	1.01403	0.000714388	9.8942e-06
database_2016_07_17_Traj2_L.mat	E1_LT1D14.899F0001.xls	1	0.0908981	44.8859	0.893467	0.000417494	3.94435e-05
database_2016_07_17_Traj2_L.mat	E1_LT1D9.548F0001.xls	1	0.51102	17.2294	1.05164	0.000574353	1.32071e-07
database_2016_07_17_Traj2_L.mat	E1_LT1D9.950F0001.xls	1	0.0810605	64.0656	0.880598	8.24335e-05	3.23643e-08
database_2016_07_17_Traj2_L.mat	E1_LT1D10.152F0001.xls	2	0.0797005	34.9891	0.92165	6.64159e-05	5.78807e-07
database_2016_07_17_Traj2_L.mat	E1_LT1D10.452F0001.xls	2	0.359123	1.5892	1.91669	0.000322393	2.97097e-06
database_2016_07_17_Traj2_L.mat	E1_LT1D10.854F0001.xls	2	0.0701267	37.5733	0.930799	9.86203e-05	1.50755e-07
database_2016_07_17_Traj2_L.mat	E1_LT1D11.659F0001.xls	2	0.24683	23.6937	0.834705	9.08364e-05	1.31515e-07
database_2016_07_17_Traj2_L.mat	E1_LT1D12.263F0001.xls	2	0.149285	49.2468	0.880226	0.000612731	7.16683e-08
database_2016_07_17_Traj2_L.mat	E1_LT1D12.667F0001.xls	2	0.137755	39.6182	0.872111	0.000282436	1.75827e-07
database_2016_07_17_Traj2_L.mat	E1_LT1D13.070F0001.xls	2	0.317388	19.8966	1.6233	0.00048294	7.92593e-08
database_2016_07_17_Traj2_L.mat	E1_LT1D13.272F0001.xls	2	0.159261	72.6296	0.839542	0.00111808	1.38906e-07
database_2016_07_17_Traj2_L.mat	E1_LT1D13.839F0001.xls	2	0.160644	71.0533	0.858761	0.000701968	1.16186e-07
database_2016_07_17_Traj2_L.mat	E1_LT1D13.976F0001.xls	2	0.137464	76.2981	0.82242	0.000328502	1.29181e-07
database_2016_07_17_Traj2_L.mat	E1_LT1D14.036F0001.xls	2	0.729823	9.11854	4.32193	0.000818914	3.09874e-06
database_2016_07_17_Traj2_L.mat	E1_LT1D14.184F0001.xls	2	0.141768	67.4994	0.791691	0.00103468	3.29399e-07
database_2016_07_17_Traj2_L.mat	E1_LT1D14.337F0001.xls	2	0.0857957	34.02	1.7837	0.000919278	1.57392e-07
database_2016_07_17_Traj2_L.mat	E1_LT1D14.599F0001.xls	2	0.126519	75.0757	0.884354	0.00097303	1.24676e-07
database_2016_07_17_Traj2_L.mat	E1_LT1D14.696F0001.xls	2	0.101627	63.9626	0.906913	0.00132167	3.30087e-07
database_2016_07_17_Traj2_L.mat	E1_LT1D14.797F0001.xls	2	0.097765	37.2544	0.915279	0.000714388	8.7137e-06
database_2016_07_17_Traj2_L.mat	E1_LT1D14.899F0001.xls	2	0.110323	32.7635	0.952587	0.000417494	7.43778e-05
database_2016_07_17_Traj2_L.mat	E1_LT1D9.548F0001.xls	2	0.151585	134.134	0.726855	0.000574353	5.82164e-08
database_2016_07_17_Traj2_L.mat	E1_LT1D9.950F0001.xls	2	0.0757985	47.6424	0.952922	8.24335e-05	5.08548e-08
database_2016_07_17_Traj2_L.mat	E1_LT1D10.152F0001.xls	3	0.0475389	29.2205	0.966267	6.64159e-05	1.21147e-06
database_2016_07_17_Traj2_L.mat	E1_LT1D10.452F0001.xls	3	0.109885	38.3394	1.03221	0.000322393	1.70585e-07
database_2016_07_17_Traj2_L.mat	E1_LT1D10.854F0001.xls	3	0.0423411	44.7477	0.937393	9.86203e-05	1.23498e-07
database_2016_07_17_Traj2_L.mat	E1_LT1D11.659F0001.xls	3	0.0741127	30.0674	0.831993	9.08364e-05	1.44679e-07
database_2016_07_17_Traj2_L.mat	E1_LT1D12.263F0001.xls	3	0.378368	2.18993	2.57447	0.000612731	2.2594e-06
database_2016_07_17_Traj2_L.mat	E1_LT1D12.667F0001.xls	3	0.739261	3.86999	0.881154	0.000282436	2.56582e-06
database_2016_07_17_Traj2_L.mat	E1_LT1D13.070F0001.xls	3	0.0468797	25.9053	1.07397	0.00048294	4.02561e-08
database_2016_07_17_Traj2_L.mat	E1_LT1D14.036F0001.xls	3	0.274015	20.1855	1.17895	0.000818914	1.06894e-06
database_2016_07_17_Traj2_L.mat	E1_LT1D14.797F0001.xls	3	0.277183	6.47902	0.860438	0.000714388	2.02009e-05
database_2016_07_17_Traj2_L.mat	E1_LT1D14.899F0001.xls	3	0.0395607	24.5726	0.977462	0.000417494	0.000112788
database_2016_07_17_Traj2_L.mat	E1_LT1D9.950F0001.xls	3	0.0519109	62.8547	0.883253	8.24335e-05	4.79292e-08
database_2016_07_17_Traj2_L.mat	E1_LT1D10.152F0001.xls	4	0.0203354	23.4176	0.965342	6.64159e-05	8.64025e-07
database_2016_07_17_Traj2_L.mat	E1_LT1D10.452F0001.xls	4	0.0799408	74.8512	0.908065	0.000322393	3.96679e-08
database_2016_07_17_Traj2_L.mat	E1_LT1D11.659F0001.xls	4	0.0758119	20.3683	0.978638	9.08364e-05	1.41947e-07
database_2016_07_17_Traj2_L.mat	E1_LT1D12.263F0001.xls	4	0.0480136	29.9647	1.08069	0.000612731	2.71522e-07
database_2016_07_17_Traj2_L.mat	E1_LT1D12.667F0001.xls	4	0.048308	25.8437	0.939616	0.000282436	1.69947e-07
database_2016_07_17_Traj2_L.mat	E1_LT1D13.070F0001.xls	4	1	0.283428	1.48148	0.00048294	5.31891e-06
database_2016_07_17_Traj2_L.mat	E1_LT1D14.036F0001.xls	4	0.0987517	8.10537	1.43252	0.000818914	3.24892e-06
database_2016_07_17_Traj2_L.mat	E1_LT1D14.797F0001.xls	4	0.0337157	15.8736	1.14112	0.000714388	3.42835e-05
database_2016_07_17_Traj2_L.mat	E1_LT1D14.899F0001.xls	4	0.0387318	16.3817	1.13621	0.000417494	0.000344685
database_2016_09_04_Traj1_R_updatedGPeBorder.mat	E1_RT1D10.514F0001.xls	1	0.417425	27.2696	1.38746	0.000453724	1.45925e-06
database_2016_09_04_Traj1_R_updatedGPeBorder.mat	E1_RT1D10.713F0001.xls	1	0.0423204	32.2656	0.886895	8.13124e-05	1.01515e-06
database_2016_09_04_Traj1_R_updatedGPeBorder.mat	E1_RT1D11.335F0001.xls	1	0.0501186	42.4557	0.946441	7.19931e-05	4.75455e-07
database_2016_09_04_Traj1_R_updatedGPeBorder.mat	E1_RT1D11.422F0001.xls	1	0.0358782	41.6797	0.855123	8.78451e-05	1.79126e-06
database_2016_09_04_Traj1_R_updatedGPeBorder.mat	E1_RT1D11.542F0001.xls	1	0.0316959	33.4868	0.849986	8.19283e-05	1.89376e-06
database_2016_09_04_Traj1_R_updatedGPeBorder.mat	E1_RT1D11.655F0001.xls	1	0.0718691	22.569	1.13127	0.000297441	6.41155e-07
database_2016_09_04_Traj1_R_updatedGPeBorder.mat	E1_RT1D11.787F0001.xls	1	0.175308	30.5455	0.934893	0.00013958	4.32861e-06
database_2016_09_04_Traj1_R_updatedGPeBorder.mat	E1_RT1D12.227F0001.xls	1	0.0369856	42.6628	0.878204	0.000100198	1.09561e-06
database_2016_09_04_Traj1_R_updatedGPeBorder.mat	E1_RT1D12.388F0001.xls	1	0.0652199	36.9812	0.975108	0.000268348	1.37769e-06
database_2016_09_04_Traj1_R_updatedGPeBorder.mat	E1_RT1D12.498F0001.xls	1	0.78388	2.3263	1.4216	0.000692571	1.77921e-05
database_2016_09_04_Traj1_R_updatedGPeBorder.mat	E1_RT1D12.629F0001.xls	1	0.0930197	90.9793	0.84491	0.000429105	4.63658e-08
database_2016_09_04_Traj1_R_updatedGPeBorder.mat	E1_RT1D12.752F0001.xls	1	0.408151	22.4462	5.46826	0.000786069	4.24979e-08
database_2016_09_04_Traj1_R_updatedGPeBorder.mat	E1_RT1D12.904F0001.xls	1	0.707296	2.92751	1.95914	0.000591788	1.35732e-05
database_2016_09_04_Traj1_R_updatedGPeBorder.mat	E1_RT1D13.056F0001.xls	1	0.0503613	41.0623	0.948593	0.000147662	1.34e-08
database_2016_09_04_Traj1_R_updatedGPeBorder.mat	E1_RT1D13.257F0001.xls	1	0.484614	7.11236	1.084	0.000518641	2.59784e-07
database_2016_09_04_Traj1_R_updatedGPeBorder.mat	E1_RT1D13.458F0001.xls	1	0.0380938	41.8139	0.961786	0.0001395	2.69324e-07
database_2016_09_04_Traj1_R_updatedGPeBorder.mat	E1_RT1D13.583F0001.xls	1	0.0333719	40.3295	0.893438	7.21314e-05	4.19708e-07
database_2016_09_04_Traj1_R_updatedGPeBorder.mat	E1_RT1D13.692F0001.xls	1	0.0331304	45.2698	0.961163	7.49272e-05	1.77212e-06
database_2016_09_04_Traj1_R_updatedGPeBorder.mat	E1_RT1D13.796F0001.xls	1	0.0343941	37.7619	0.999204	8.36876e-05	7.63337e-07
database_2016_09_04_Traj1_R_updatedGPeBorder.mat	E1_RT1D14.102F0002.xls	1	0.683439	9.59981	3.9029	0.000909263	4.50853e-06
database_2016_09_04_Traj1_R_updatedGPeBorder.mat	E1_RT1D14.265F0001.xls	1	0.0615918	59.6561	0.929465	0.00021153	9.98732e-08
database_2016_09_04_Traj1_R_updatedGPeBorder.mat	E1_RT1D14.594F0001.xls	1	0.0571129	44.9191	0.940608	0.000258268	3.54158e-06
database_2016_09_04_Traj1_R_updatedGPeBorder.mat	E1_RT1D14.696F0001.xls	1	0.036234	41.8504	0.869332	7.12945e-05	1.28664e-05
database_2016_09_04_Traj1_R_updatedGPeBorder.mat	E1_RT1D14.797F0001.xls	1	0.0442427	49.0696	0.948225	5.62059e-05	7.81141e-06
database_2016_09_04_Traj1_R_updatedGPeBorder.mat	E1_RT1D14.899F0002.xls	1	0.0450753	42.9995	0.974786	6.4708e-05	1.32946e-05
database_2016_09_04_Traj1_R_updatedGPeBorder.mat	E1_RT1D15.000F0001.xls	1	0.0387737	47.098	0.869517	7.73746e-05	1.73445e-06
database_2016_09_04_Traj1_R_updatedGPeBorder.mat	E2_RT1D11.335F0001.xls	1	0.223238	54.0423	0.899963	0.000537408	2.48535e-07
database_2016_09_04_Traj1_R_updatedGPeBorder.mat	E2_RT1D11.422F0001.xls	1	0.0916036	48.2481	0.875023	0.000111091	6.8432e-07
database_2016_09_04_Traj1_R_updatedGPeBorder.mat	E2_RT1D11.542F0001.xls	1	0.11365	62.84	1.09802	0.000294518	8.08939e-07
database_2016_09_04_Traj1_R_updatedGPeBorder.mat	E2_RT1D11.655F0001.xls	1	0.232659	33.7011	0.982488	0.000516889	5.86357e-07
database_2016_09_04_Traj1_R_updatedGPeBorder.mat	E2_RT1D11.787F0001.xls	1	0.0593567	31.4116	0.948277	0.000101613	4.61507e-07
database_2016_09_04_Traj1_R_updatedGPeBorder.mat	E2_RT1D12.227F0001.xls	1	0.589623	13.9408	1.74556	0.00132165	4.62906e-06
database_2016_09_04_Traj1_R_updatedGPeBorder.mat	E2_RT1D12.388F0001.xls	1	0.340915	67.39	1.06691	0.000915726	3.08893e-08
database_2016_09_04_Traj1_R_updatedGPeBorder.mat	E2_RT1D12.498F0001.xls	1	0.273567	46.1433	0.988187	0.000698404	7.2965e-08
database_2016_09_04_Traj1_R_updatedGPeBorder.mat	E2_RT1D12.629F0001.xls	1	0.332949	67.9642	1.10382	0.000883842	9.86441e-08
database_2016_09_04_Traj1_R_updatedGPeBorder.mat	E2_RT1D12.752F0001.xls	1	0.185559	24.9019	1.34129	0.000818833	1.04869e-07
database_2016_09_04_Traj1_R_updatedGPeBorder.mat	E2_RT1D12.904F0001.xls	1	0.0463834	34.1653	0.848669	0.000145074	1.31078e-05
database_2016_09_04_Traj1_R_updatedGPeBorder.mat	E2_RT1D13.056F0001.xls	1	0.157145	78.8626	1.13942	0.000474329	4.14218e-07
database_2016_09_04_Traj1_R_updatedGPeBorder.mat	E2_RT1D13.257F0001.xls	1	0.0856013	61.5526	0.940125	0.000326276	8.47152e-08
database_2016_09_04_Traj1_R_updatedGPeBorder.mat	E2_RT1D13.458F0001.xls	1	0.172968	47.0211	0.872029	0.000203976	1.54999e-06
database_2016_09_04_Traj1_R_updatedGPeBorder.mat	E2_RT1D13.583F0001.xls	1	0.328929	54.74	0.927524	0.000499245	9.93436e-08
database_2016_09_04_Traj1_R_updatedGPeBorder.mat	E2_RT1D13.692F0001.xls	1	0.134571	21.0354	1.11713	0.000581626	2.61329e-06
database_2016_09_04_Traj1_R_updatedGPeBorder.mat	E2_RT1D13.796F0001.xls	1	0.0744704	75.6063	0.825981	0.000453255	6.00397e-07
database_2016_09_04_Traj1_R_updatedGPeBorder.mat	E2_RT1D14.102F0002.xls	1	0.455466	28.8879	1.55257	0.000768968	1.85697e-07
database_2016_09_04_Traj1_R_updatedGPeBorder.mat	E2_RT1D14.265F0001.xls	1	0.0928934	60.5147	1.04914	0.000706212	5.27008e-09
database_2016_09_04_Traj1_R_updatedGPeBorder.mat	E2_RT1D14.594F0001.xls	1	0.0661083	38.6183	1.02491	0.000229763	7.43578e-06
database_2016_09_04_Traj1_R_updatedGPeBorder.mat	E2_RT1D14.696F0001.xls	1	0.0490195	38.323	0.964748	0.000185155	2.58464e-06
database_2016_09_04_Traj1_R_updatedGPeBorder.mat	E2_RT1D14.797F0001.xls	1	0.0498605	30.3756	1.10922	9.65478e-05	6.93907e-06
database_2016_09_04_Traj1_R_updatedGPeBorder.mat	E2_RT1D14.899F0002.xls	1	0.0303139	35.8075	1.1158	0.000258286	2.26351e-06
database_2016_09_04_Traj1_R_updatedGPeBorder.mat	E2_RT1D15.000F0001.xls	1	0.0357701	39.2961	0.906909	0.000212442	8.79214e-08
database_2016_09_04_Traj1_R_updatedGPeBorder.mat	E1_RT1D10.514F0001.xls	2	0.133698	120.822	0.767658	0.000453724	2.44148e-07
database_2016_09_04_Traj1_R_updatedGPeBorder.mat	E1_RT1D10.713F0001.xls	2	0.0445063	41.2762	0.916723	8.13124e-05	8.85886e-07
database_2016_09_04_Traj1_R_updatedGPeBorder.mat	E1_RT1D11.335F0001.xls	2	0.0571679	41.6269	0.958108	7.19931e-05	4.6315e-07
database_2016_09_04_Traj1_R_updatedGPeBorder.mat	E1_RT1D11.422F0001.xls	2	0.0452603	25.2704	1.07604	8.78451e-05	4.07709e-06
database_2016_09_04_Traj1_R_updatedGPeBorder.mat	E1_RT1D11.542F0001.xls	2	0.0427465	25.8431	0.968621	8.19283e-05	2.65021e-06
database_2016_09_04_Traj1_R_updatedGPeBorder.mat	E1_RT1D11.655F0001.xls	2	0.539952	1.23276	2.18675	0.000297441	2.28665e-05
database_2016_09_04_Traj1_R_updatedGPeBorder.mat	E1_RT1D11.787F0001.xls	2	0.0943419	109.712	0.770761	0.00013958	8.27949e-07
database_2016_09_04_Traj1_R_updatedGPeBorder.mat	E1_RT1D12.227F0001.xls	2	0.0582214	36.6308	0.921727	0.000100198	1.47924e-06
database_2016_09_04_Traj1_R_updatedGPeBorder.mat	E1_RT1D12.388F0001.xls	2	0.0603279	48.2969	0.911282	0.000268348	7.35796e-07
database_2016_09_04_Traj1_R_updatedGPeBorder.mat	E1_RT1D12.498F0001.xls	2	0.140407	154.228	0.680374	0.000692571	8.31981e-08
database_2016_09_04_Traj1_R_updatedGPeBorder.mat	E1_RT1D12.629F0001.xls	2	0.692782	5.38094	4.55201	0.000429105	1.18456e-06
database_2016_09_04_Traj1_R_updatedGPeBorder.mat	E1_RT1D12.752F0001.xls	2	0.107166	140.003	0.764899	0.000786069	2.38484e-08
database_2016_09_04_Traj1_R_updatedGPeBorder.mat	E1_RT1D12.904F0001.xls	2	0.12157	134.867	0.688589	0.000591788	1.42724e-07
database_2016_09_04_Traj1_R_updatedGPeBorder.mat	E1_RT1D13.056F0001.xls	2	0.0414072	30.5252	0.978572	0.000147662	3.51443e-08
database_2016_09_04_Traj1_R_updatedGPeBorder.mat	E1_RT1D13.257F0001.xls	2	0.119873	135.047	0.715916	0.000518641	9.32286e-08
database_2016_09_04_Traj1_R_updatedGPeBorder.mat	E1_RT1D13.458F0001.xls	2	0.122733	9.48239	1.2798	0.0001395	5.80569e-07
database_2016_09_04_Traj1_R_updatedGPeBorder.mat	E1_RT1D13.583F0001.xls	2	0.0583448	31.7223	0.886624	7.21314e-05	5.6021e-07
database_2016_09_04_Traj1_R_updatedGPeBorder.mat	E1_RT1D13.692F0001.xls	2	0.0271028	25.5097	1.00794	7.49272e-05	3.44122e-06
database_2016_09_04_Traj1_R_updatedGPeBorder.mat	E1_RT1D13.796F0001.xls	2	0.0387507	41.5621	0.883581	8.36876e-05	5.04295e-07
database_2016_09_04_Traj1_R_updatedGPeBorder.mat	E1_RT1D14.102F0002.xls	2	0.120348	102.918	0.761365	0.000909263	1.66702e-07
database_2016_09_04_Traj1_R_updatedGPeBorder.mat	E1_RT1D14.265F0001.xls	2	0.058222	60.428	0.912568	0.00021153	1.16442e-07
database_2016_09_04_Traj1_R_updatedGPeBorder.mat	E1_RT1D14.594F0001.xls	2	0.0522455	37.7617	0.951673	0.000258268	8.25987e-06
database_2016_09_04_Traj1_R_updatedGPeBorder.mat	E1_RT1D14.696F0001.xls	2	0.029043	33.4803	0.841281	7.12945e-05	1.92424e-05
database_2016_09_04_Traj1_R_updatedGPeBorder.mat	E1_RT1D14.797F0001.xls	2	0.0599566	33.8581	0.850249	5.62059e-05	1.6372e-05
database_2016_09_04_Traj1_R_updatedGPeBorder.mat	E1_RT1D14.899F0002.xls	2	0.0397602	47.9137	1.00028	6.4708e-05	1.03141e-05
database_2016_09_04_Traj1_R_updatedGPeBorder.mat	E1_RT1D15.000F0001.xls	2	0.0554926	46.9294	0.926247	7.73746e-05	1.84054e-06
database_2016_09_04_Traj1_R_updatedGPeBorder.mat	E2_RT1D11.335F0001.xls	2	0.471026	24.2531	3.62893	0.000537408	6.06378e-07
database_2016_09_04_Traj1_R_updatedGPeBorder.mat	E2_RT1D11.422F0001.xls	2	0.0618365	47.0419	0.931969	0.000111091	3.7915e-07
database_2016_09_04_Traj1_R_updatedGPeBorder.mat	E2_RT1D11.542F0001.xls	2	0.112245	44.1578	2.23406	0.000294518	1.38037e-06
database_2016_09_04_Traj1_R_updatedGPeBorder.mat	E2_RT1D11.655F0001.xls	2	0.114485	58.6683	1.0883	0.000516889	4.60245e-07
database_2016_09_04_Traj1_R_updatedGPeBorder.mat	E2_RT1D11.787F0001.xls	2	0.0351034	18.9612	0.949981	0.000101613	4.80789e-07
database_2016_09_04_Traj1_R_updatedGPeBorder.mat	E2_RT1D12.227F0001.xls	2	0.12672	86.4989	0.982432	0.00132165	7.46231e-07
database_2016_09_04_Traj1_R_updatedGPeBorder.mat	E2_RT1D12.388F0001.xls	2	0.061534	49.2122	1.29471	0.000915726	5.66911e-08
database_2016_09_04_Traj1_R_updatedGPeBorder.mat	E2_RT1D12.498F0001.xls	2	0.0855525	68.0689	1.12115	0.000698404	1.46939e-07
database_2016_09_04_Traj1_R_updatedGPeBorder.mat	E2_RT1D12.629F0001.xls	2	0.0750238	54.9069	1.3132	0.000883842	1.76099e-07
database_2016_09_04_Traj1_R_updatedGPeBorder.mat	E2_RT1D12.752F0001.xls	2	0.0994965	93.2551	0.938284	0.000818833	3.49813e-08
database_2016_09_04_Traj1_R_updatedGPeBorder.mat	E2_RT1D12.904F0001.xls	2	0.457729	6.14774	3.62941	0.000145074	0.000147172
database_2016_09_04_Traj1_R_updatedGPeBorder.mat	E2_RT1D13.056F0001.xls	2	0.0925445	72.386	2.2029	0.000474329	2.73806e-07
database_2016_09_04_Traj1_R_updatedGPeBorder.mat	E2_RT1D13.257F0001.xls	2	0.278102	29.9861	1.71823	0.000326276	2.78554e-07
database_2016_09_04_Traj1_R_updatedGPeBorder.mat	E2_RT1D13.458F0001.xls	2	0.0813226	63.8389	0.925164	0.000203976	7.99003e-07
database_2016_09_04_Traj1_R_updatedGPeBorder.mat	E2_RT1D13.583F0001.xls	2	0.0671428	50.0379	1.28081	0.000499245	1.43419e-07
database_2016_09_04_Traj1_R_updatedGPeBorder.mat	E2_RT1D13.692F0001.xls	2	0.90826	5.8211	1.84877	0.000581626	9.49847e-06
database_2016_09_04_Traj1_R_updatedGPeBorder.mat	E2_RT1D13.796F0001.xls	2	0.103008	35.683	1.00924	0.000453255	1.52112e-06
database_2016_09_04_Traj1_R_updatedGPeBorder.mat	E2_RT1D14.102F0002.xls	2	0.10664	66.3009	1.0821	0.000768968	1.04956e-07
database_2016_09_04_Traj1_R_updatedGPeBorder.mat	E2_RT1D14.265F0001.xls	2	0.351287	29.6581	1.11685	0.000706212	2.03018e-08
database_2016_09_04_Traj1_R_updatedGPeBorder.mat	E2_RT1D14.594F0001.xls	2	0.050474	46.9815	0.904465	0.000229763	7.94292e-06
database_2016_09_04_Traj1_R_updatedGPeBorder.mat	E2_RT1D14.696F0001.xls	2	0.0900834	46.4821	0.915758	0.000185155	3.56373e-06
database_2016_09_04_Traj1_R_updatedGPeBorder.mat	E2_RT1D14.797F0001.xls	2	0.0399634	38.9493	1.06504	9.65478e-05	4.13008e-06
database_2016_09_04_Traj1_R_updatedGPeBorder.mat	E2_RT1D14.899F0002.xls	2	0.0437513	30.9023	0.827112	0.000258286	2.73957e-06
database_2016_09_04_Traj1_R_updatedGPeBorder.mat	E2_RT1D15.000F0001.xls	2	0.0500552	30.8213	0.860349	0.000212442	8.99767e-08
database_2016_09_04_Traj1_R_updatedGPeBorder.mat	E1_RT1D10.713F0001.xls	3	0.0354696	21.0687	0.925843	8.13124e-05	2.05932e-06
database_2016_09_04_Traj1_R_updatedGPeBorder.mat	E1_RT1D11.335F0001.xls	3	0.041856	20.4933	0.95372	7.19931e-05	9.08571e-07
database_2016_09_04_Traj1_R_updatedGPeBorder.mat	E1_RT1D11.422F0001.xls	3	0.0500557	44.8522	0.911918	8.78451e-05	1.2424e-06
database_2016_09_04_Traj1_R_updatedGPeBorder.mat	E1_RT1D11.542F0001.xls	3	0.0382833	31.6669	0.977539	8.19283e-05	1.51664e-06
database_2016_09_04_Traj1_R_updatedGPeBorder.mat	E1_RT1D11.655F0001.xls	3	0.0776513	59.5517	0.873301	0.000297441	3.17327e-07
database_2016_09_04_Traj1_R_updatedGPeBorder.mat	E1_RT1D12.227F0001.xls	3	0.0456746	40.0855	0.949691	0.000100198	2.66975e-06
database_2016_09_04_Traj1_R_updatedGPeBorder.mat	E1_RT1D12.388F0001.xls	3	0.0971131	3.53392	1.82957	0.000268348	8.01489e-06
database_2016_09_04_Traj1_R_updatedGPeBorder.mat	E1_RT1D12.629F0001.xls	3	0.0429603	51.6295	0.920273	0.000429105	7.65525e-08
database_2016_09_04_Traj1_R_updatedGPeBorder.mat	E1_RT1D12.752F0001.xls	3	0.624416	1.43723	2.99465	0.000786069	1.11701e-06
database_2016_09_04_Traj1_R_updatedGPeBorder.mat	E1_RT1D13.056F0001.xls	3	0.439414	0.271576	1.04787	0.000147662	5.29285e-06
database_2016_09_04_Traj1_R_updatedGPeBorder.mat	E1_RT1D13.458F0001.xls	3	0.0508133	36.1016	0.952584	0.0001395	2.88219e-07
database_2016_09_04_Traj1_R_updatedGPeBorder.mat	E1_RT1D13.583F0001.xls	3	0.0336053	40.3739	0.951306	7.21314e-05	2.16774e-07
database_2016_09_04_Traj1_R_updatedGPeBorder.mat	E1_RT1D13.692F0001.xls	3	0.0537145	46.1289	0.9422	7.49272e-05	1.32557e-06
database_2016_09_04_Traj1_R_updatedGPeBorder.mat	E1_RT1D13.796F0001.xls	3	0.0377462	30.7616	0.940402	8.36876e-05	1.17151e-06
database_2016_09_04_Traj1_R_updatedGPeBorder.mat	E1_RT1D14.265F0001.xls	3	0.17262	7.39354	2.00556	0.00021153	2.84382e-06
database_2016_09_04_Traj1_R_updatedGPeBorder.mat	E1_RT1D14.594F0001.xls	3	0.0299039	30.1106	0.899064	0.000258268	1.20239e-05
database_2016_09_04_Traj1_R_updatedGPeBorder.mat	E1_RT1D14.696F0001.xls	3	0.0462244	35.6959	0.836638	7.12945e-05	8.46458e-06
database_2016_09_04_Traj1_R_updatedGPeBorder.mat	E1_RT1D14.797F0001.xls	3	0.0455884	44.1627	0.974791	5.62059e-05	1.49038e-05
database_2016_09_04_Traj1_R_updatedGPeBorder.mat	E1_RT1D14.899F0002.xls	3	0.0569595	41.0338	0.905859	6.4708e-05	2.63315e-05
database_2016_09_04_Traj1_R_updatedGPeBorder.mat	E1_RT1D15.000F0001.xls	3	0.0408811	36.5568	0.932108	7.73746e-05	1.16604e-06
database_2016_09_04_Traj1_R_updatedGPeBorder.mat	E2_RT1D11.335F0001.xls	3	0.0468997	31.7098	1.05029	0.000537408	6.30208e-07
database_2016_09_04_Traj1_R_updatedGPeBorder.mat	E2_RT1D11.422F0001.xls	3	0.0549167	41.4495	0.936869	0.000111091	7.88876e-07
database_2016_09_04_Traj1_R_updatedGPeBorder.mat	E2_RT1D11.787F0001.xls	3	0	0.114224	1.0579	0.000101613	5.69651e-05
database_2016_09_04_Traj1_R_updatedGPeBorder.mat	E2_RT1D12.904F0001.xls	3	0.0351927	41.8248	0.875328	0.000145074	8.89173e-06
database_2016_09_04_Traj1_R_updatedGPeBorder.mat	E2_RT1D13.257F0001.xls	3	0.0844301	22.6542	1.83313	0.000326276	2.92207e-07
database_2016_09_04_Traj1_R_updatedGPeBorder.mat	E2_RT1D13.692F0001.xls	3	0.0402528	36.1834	1.05103	0.000581626	1.10584e-06
database_2016_09_04_Traj1_R_updatedGPeBorder.mat	E2_RT1D13.796F0001.xls	3	0.828858	0.320026	1.45159	0.000453255	0.000155136
database_2016_09_04_Traj1_R_updatedGPeBorder.mat	E2_RT1D14.265F0001.xls	3	0.0684313	32.3395	1.27299	0.000706212	9.81402e-09
database_2016_09_04_Traj1_R_updatedGPeBorder.mat	E2_RT1D14.594F0001.xls	3	0.0534708	41.57	0.879748	0.000229763	1.36537e-05
database_2016_09_04_Traj1_R_updatedGPeBorder.mat	E2_RT1D14.696F0001.xls	3	0.0460495	40.7955	0.898195	0.000185155	3.56664e-06
database_2016_09_04_Traj1_R_updatedGPeBorder.mat	E2_RT1D14.797F0001.xls	3	0.0320955	20.822	1.07035	9.65478e-05	6.88509e-06
database_2016_09_04_Traj1_R_updatedGPeBorder.mat	E2_RT1D14.899F0002.xls	3	0.0536734	31.8834	0.937375	0.000258286	3.75833e-06
database_2016_09_04_Traj1_R_updatedGPeBorder.mat	E2_RT1D15.000F0001.xls	3	0.0642228	37.3566	0.980584	0.000212442	6.94391e-08
database_2016_09_04_Traj1_R_updatedGPeBorder.mat	E1_RT1D10.713F0001.xls	4	0.0251039	30.1455	1.00207	8.13124e-05	1.46795e-06
database_2016_09_04_Traj1_R_updatedGPeBorder.mat	E1_RT1D11.335F0001.xls	4	0.0231887	32.3974	0.938051	7.19931e-05	4.68377e-07
database_2016_09_04_Traj1_R_updatedGPeBorder.mat	E1_RT1D11.422F0001.xls	4	0.0227992	26.4737	0.934115	8.78451e-05	3.7085e-06
database_2016_09_04_Traj1_R_updatedGPeBorder.mat	E1_RT1D11.542F0001.xls	4	0.0200334	28.1484	0.948706	8.19283e-05	4.31116e-06
database_2016_09_04_Traj1_R_updatedGPeBorder.mat	E1_RT1D11.655F0001.xls	4	0.0508707	56.5172	0.904096	0.000297441	4.03393e-07
database_2016_09_04_Traj1_R_updatedGPeBorder.mat	E1_RT1D12.388F0001.xls	4	0.0331417	48.761	0.915087	0.000268348	5.78812e-07
database_2016_09_04_Traj1_R_updatedGPeBorder.mat	E1_RT1D13.056F0001.xls	4	0.0188499	29.8191	0.933148	0.000147662	5.17109e-08
database_2016_09_04_Traj1_R_updatedGPeBorder.mat	E1_RT1D13.458F0001.xls	4	0.0248911	34.9592	0.966402	0.0001395	3.34039e-07
database_2016_09_04_Traj1_R_updatedGPeBorder.mat	E1_RT1D13.583F0001.xls	4	0.0250015	25.8215	0.938361	7.21314e-05	5.43036e-07
database_2016_09_04_Traj1_R_updatedGPeBorder.mat	E1_RT1D13.692F0001.xls	4	0.0336654	36.1498	1.00939	7.49272e-05	1.87868e-06
database_2016_09_04_Traj1_R_updatedGPeBorder.mat	E1_RT1D13.796F0001.xls	4	0.0334721	33.7617	0.977794	8.36876e-05	1.06784e-06
database_2016_09_04_Traj1_R_updatedGPeBorder.mat	E1_RT1D14.265F0001.xls	4	0.0274532	37.8208	0.940239	0.00021153	7.23519e-08
database_2016_09_04_Traj1_R_updatedGPeBorder.mat	E1_RT1D14.594F0001.xls	4	0.0461286	53.3106	0.849208	0.000258268	5.14755e-06
database_2016_09_04_Traj1_R_updatedGPeBorder.mat	E1_RT1D14.696F0001.xls	4	0.0284688	24.864	0.909504	7.12945e-05	2.48538e-05
database_2016_09_04_Traj1_R_updatedGPeBorder.mat	E1_RT1D14.797F0001.xls	4	0.0328591	25.2709	0.845863	5.62059e-05	1.50737e-05
database_2016_09_04_Traj1_R_updatedGPeBorder.mat	E1_RT1D14.899F0002.xls	4	0.0281199	22.3597	0.956234	6.4708e-05	2.25517e-05
database_2016_09_04_Traj1_R_updatedGPeBorder.mat	E1_RT1D15.000F0001.xls	4	0.0267786	20.8715	0.954449	7.73746e-05	2.46543e-06
database_2016_09_04_Traj1_R_updatedGPeBorder.mat	E2_RT1D11.787F0001.xls	4	0.00947305	17.1336	1.00757	0.000101613	4.7072e-07
database_2016_09_04_Traj1_R_updatedGPeBorder.mat	E2_RT1D12.904F0001.xls	4	0.0378809	47.9726	0.936535	0.000145074	8.20628e-06
database_2016_09_04_Traj1_R_updatedGPeBorder.mat	E2_RT1D13.692F0001.xls	4	0.0381178	23.4829	1.35359	0.000581626	1.87623e-06
database_2016_09_04_Traj1_R_updatedGPeBorder.mat	E2_RT1D13.796F0001.xls	4	0.0284729	38.3232	1.01338	0.000453255	2.54688e-06
database_2016_09_04_Traj1_R_updatedGPeBorder.mat	E2_RT1D14.797F0001.xls	4	0.0290343	23.5166	0.894412	9.65478e-05	8.70997e-06
database_2016_09_04_Traj1_R_updatedGPeBorder.mat	E2_RT1D14.899F0002.xls	4	0.0310974	27.714	0.815743	0.000258286	3.88944e-06
database_2016_09_04_Traj1_R_updatedGPeBorder.mat	E2_RT1D15.000F0001.xls	4	0.0391379	26.7314	0.934408	0.000212442	1.58503e-07
database_2016_09_04_Traj1_R_updatedGPeBorder.mat	E1_RT1D13.056F0001.xls	5	0.0452318	39.4329	0.907673	0.000147662	2.281e-08
database_2016_09_04_Traj1_R_updatedGPeBorder.mat	E1_RT1D14.696F0001.xls	5	0.0398316	22.4023	1.02224	7.12945e-05	1.48108e-05
database_2016_09_04_Traj1_R_updatedGPeBorder.mat	E2_RT1D11.787F0001.xls	5	0.0338095	38.6077	0.911166	0.000101613	3.18701e-07
database_2016_09_04_Traj2_L.mat	E1_LT1D10.835F0001.xls	1	0.701981	28.4267	4.02518	0.000285269	1.24512e-08
database_2016_09_04_Traj2_L.mat	E1_LT1D11.035F0001.xls	1	0.0498102	42.8994	0.949384	8.09975e-05	1.20777e-07
database_2016_09_04_Traj2_L.mat	E1_LT1D11.235F0001.xls	1	0.134427	58.8035	0.870765	9.06936e-05	3.952e-07
database_2016_09_04_Traj2_L.mat	E1_LT1D11.400F0001.xls	1	0.0833724	40.7013	0.869843	0.000238045	8.19493e-07
database_2016_09_04_Traj2_L.mat	E1_LT1D11.601F0001.xls	1	0.23093	29.8793	0.852185	0.000297471	1.67109e-07
database_2016_09_04_Traj2_L.mat	E1_LT1D11.788F0002.xls	1	0.0588158	57.6288	0.883292	0.000108826	1.06842e-07
database_2016_09_04_Traj2_L.mat	E1_LT1D12.034F0001.xls	1	0.180753	23.1913	1.18005	0.000164062	1.42345e-06
database_2016_09_04_Traj2_L.mat	E1_LT1D12.235F0001.xls	1	0.0966108	2.18973	0.57124	0.000234659	1.86839e-05
database_2016_09_04_Traj2_L.mat	E1_LT1D12.436F0001.xls	1	0.0371114	46.9744	0.861625	4.80598e-05	1.10965e-06
database_2016_09_04_Traj2_L.mat	E1_LT1D12.637F0001.xls	1	0.055413	49.4567	0.951175	0.000134468	7.95101e-08
database_2016_09_04_Traj2_L.mat	E1_LT1D12.838F0001.xls	1	0.736014	14.5758	1.58212	0.000292707	7.11425e-07
database_2016_09_04_Traj2_L.mat	E1_LT1D13.040F0001.xls	1	0.233033	6.03485	1.93721	0.000201098	7.42111e-07
database_2016_09_04_Traj2_L.mat	E1_LT1D13.242F0001.xls	1	0.550839	32.9215	0.985855	0.000327601	3.48517e-09
database_2016_09_04_Traj2_L.mat	E1_LT1D13.443F0001.xls	1	0.0712888	44.2946	0.937401	0.000328056	1.8412e-07
database_2016_09_04_Traj2_L.mat	E1_LT1D13.644F0001.xls	1	0.110905	109.784	0.71123	0.000775257	6.63105e-08
database_2016_09_04_Traj2_L.mat	E1_LT1D13.964F0003.xls	1	0.125575	103.483	0.706362	0.00329898	1.06905e-05
database_2016_09_04_Traj2_L.mat	E1_LT1D14.039F0001.xls	1	0.0821371	32.4031	1.02219	0.000101487	7.56071e-08
database_2016_09_04_Traj2_L.mat	E1_LT1D14.181F0001.xls	1	0.0263564	30.0326	0.934971	0.000209073	1.43266e-06
database_2016_09_04_Traj2_L.mat	E1_LT1D14.308F0001.xls	1	0.0420344	38.6534	1.0493	9.39066e-05	4.73633e-08
database_2016_09_04_Traj2_L.mat	E1_LT1D14.440F0002.xls	1	0.065004	61.3089	0.918535	0.000105045	1.56359e-07
database_2016_09_04_Traj2_L.mat	E1_LT1D14.726F0001.xls	1	0.043812	34.9127	0.980876	0.000167389	1.12394e-06
database_2016_09_04_Traj2_L.mat	E1_LT1D14.829F0001.xls	1	0.0603835	46.3362	0.937167	9.08533e-05	7.6145e-07
database_2016_09_04_Traj2_L.mat	E1_LT1D14.999F0001.xls	1	0.0703817	35.5037	0.961562	7.09864e-05	2.78346e-07
database_2016_09_04_Traj2_L.mat	E2_LT1D10.080F0001.xls	1	0.128038	31.549	0.937308	0.000126027	4.59782e-06
database_2016_09_04_Traj2_L.mat	E2_LT1D10.229F0001.xls	1	0.0387989	40.5174	0.867982	0.000136571	2.91437e-06
database_2016_09_04_Traj2_L.mat	E2_LT1D10.430F0001.xls	1	0.0545353	45.8942	0.909085	8.73766e-05	6.6975e-06
database_2016_09_04_Traj2_L.mat	E2_LT1D10.632F0001.xls	1	0.0579134	40.4939	0.903886	8.26253e-05	4.01961e-07
database_2016_09_04_Traj2_L.mat	E2_LT1D10.835F0001.xls	1	0.0611475	56.397	0.905917	9.88673e-05	6.63006e-07
database_2016_09_04_Traj2_L.mat	E2_LT1D11.035F0001.xls	1	0.0292583	39.7231	0.915339	7.82638e-05	2.45909e-06
database_2016_09_04_Traj2_L.mat	E2_LT1D11.235F0001.xls	1	0.441503	23.7384	2.29916	0.000834145	9.06454e-07
database_2016_09_04_Traj2_L.mat	E2_LT1D11.400F0001.xls	1	0.36065	65.8558	0.851764	0.000907454	1.02804e-06
database_2016_09_04_Traj2_L.mat	E2_LT1D11.601F0001.xls	1	0.0394507	35.9263	1.00929	0.000296506	7.52309e-07
database_2016_09_04_Traj2_L.mat	E2_LT1D11.788F0002.xls	1	0.609369	27.9217	1.6352	0.000957135	1.25954e-07
database_2016_09_04_Traj2_L.mat	E2_LT1D12.034F0001.xls	1	0.154813	40.1347	0.849309	7.95157e-05	2.30193e-06
database_2016_09_04_Traj2_L.mat	E2_LT1D12.235F0001.xls	1	0.0414406	43.384	0.92751	5.94131e-05	3.36538e-06
database_2016_09_04_Traj2_L.mat	E2_LT1D12.436F0001.xls	1	0.0382437	44.4884	0.863092	7.99045e-05	1.3037e-05
database_2016_09_04_Traj2_L.mat	E2_LT1D12.637F0001.xls	1	0.0581465	35.5836	1.10808	0.000909007	3.68056e-07
database_2016_09_04_Traj2_L.mat	E2_LT1D12.838F0001.xls	1	0.250726	71.2736	1.00694	0.000533335	2.65385e-06
database_2016_09_04_Traj2_L.mat	E2_LT1D13.040F0001.xls	1	0.396713	51.746	1.40091	0.000568694	6.32989e-08
database_2016_09_04_Traj2_L.mat	E2_LT1D13.242F0001.xls	1	0.169565	58.7726	0.93263	0.000491343	2.53186e-07
database_2016_09_04_Traj2_L.mat	E2_LT1D13.443F0001.xls	1	0.173266	68.2947	0.887956	0.000239448	2.91738e-07
database_2016_09_04_Traj2_L.mat	E2_LT1D13.644F0001.xls	1	0.0797339	61.3734	1.0598	0.000497314	3.55385e-07
database_2016_09_04_Traj2_L.mat	E2_LT1D13.964F0003.xls	1	0.100802	78.1289	0.832669	0.00257755	4.26426e-06
database_2016_09_04_Traj2_L.mat	E2_LT1D14.039F0001.xls	1	0.144081	45.0287	1.0517	0.000277623	2.95677e-07
database_2016_09_04_Traj2_L.mat	E2_LT1D14.181F0001.xls	1	0.189064	75.2896	0.96218	0.000335796	2.32052e-07
database_2016_09_04_Traj2_L.mat	E2_LT1D14.308F0001.xls	1	0.075933	77.9372	0.810873	0.000275469	1.74624e-06
database_2016_09_04_Traj2_L.mat	E2_LT1D14.440F0002.xls	1	0.0444637	30.6189	1.85674	0.000891033	2.84781e-07
database_2016_09_04_Traj2_L.mat	E2_LT1D14.726F0001.xls	1	0.0475694	48.6574	0.875649	7.25957e-05	2.19584e-07
database_2016_09_04_Traj2_L.mat	E2_LT1D14.829F0001.xls	1	0.041079	56.8016	0.868647	6.36366e-05	6.88527e-07
database_2016_09_04_Traj2_L.mat	E2_LT1D14.999F0001.xls	1	0.0707733	58.4747	0.803563	6.58436e-05	6.01502e-08
database_2016_09_04_Traj2_L.mat	E1_LT1D10.835F0001.xls	2	0.257891	114.635	0.803963	0.000285269	2.60327e-08
database_2016_09_04_Traj2_L.mat	E1_LT1D11.035F0001.xls	2	0.0622404	51.2287	0.893823	8.09975e-05	5.18424e-08
database_2016_09_04_Traj2_L.mat	E1_LT1D11.235F0001.xls	2	0.0686996	97.269	0.856958	9.06936e-05	2.70203e-07
database_2016_09_04_Traj2_L.mat	E1_LT1D11.400F0001.xls	2	0.0635902	64.7985	0.867779	0.000238045	4.43775e-07
database_2016_09_04_Traj2_L.mat	E1_LT1D11.601F0001.xls	2	0.0939727	101.754	0.783033	0.000297471	6.74859e-08
database_2016_09_04_Traj2_L.mat	E1_LT1D11.788F0002.xls	2	0.0809808	52.2186	0.881291	0.000108826	1.83286e-07
database_2016_09_04_Traj2_L.mat	E1_LT1D12.034F0001.xls	2	0.0825062	103.278	0.774006	0.000164062	2.05539e-07
database_2016_09_04_Traj2_L.mat	E1_LT1D12.235F0001.xls	2	0.0956433	107.593	0.738892	0.000234659	2.39656e-07
database_2016_09_04_Traj2_L.mat	E1_LT1D12.436F0001.xls	2	0.0364367	41.3108	0.964475	4.80598e-05	1.11051e-06
database_2016_09_04_Traj2_L.mat	E1_LT1D12.637F0001.xls	2	0.0593799	65.9713	0.893116	0.000134468	1.38828e-07
database_2016_09_04_Traj2_L.mat	E1_LT1D12.838F0001.xls	2	0.0881161	112.962	0.750682	0.000292707	2.07038e-07
database_2016_09_04_Traj2_L.mat	E1_LT1D13.040F0001.xls	2	0.101678	118.477	0.737172	0.000201098	9.64773e-08
database_2016_09_04_Traj2_L.mat	E1_LT1D13.242F0001.xls	2	0.0927594	125.605	0.753291	0.000327601	2.70344e-09
database_2016_09_04_Traj2_L.mat	E1_LT1D13.443F0001.xls	2	0.0432332	58.1836	0.898858	0.000328056	2.21184e-07
database_2016_09_04_Traj2_L.mat	E1_LT1D13.644F0001.xls	2	0.66862	8.38443	4.69843	0.000775257	7.88583e-06
database_2016_09_04_Traj2_L.mat	E1_LT1D14.039F0001.xls	2	0.0195364	25.3468	1.02188	0.000101487	1.90831e-07
database_2016_09_04_Traj2_L.mat	E1_LT1D14.181F0001.xls	2	0.0408302	41.6242	0.906266	0.000209073	1.25735e-06
database_2016_09_04_Traj2_L.mat	E1_LT1D14.308F0001.xls	2	0.033904	31.2576	0.916698	9.39066e-05	1.60675e-07
database_2016_09_04_Traj2_L.mat	E1_LT1D14.440F0002.xls	2	0.0579549	38.4107	0.944495	0.000105045	1.7664e-07
database_2016_09_04_Traj2_L.mat	E1_LT1D14.726F0001.xls	2	0.0576714	28.2813	0.884052	0.000167389	5.55962e-07
database_2016_09_04_Traj2_L.mat	E1_LT1D14.829F0001.xls	2	0.0483807	40.5442	0.962668	9.08533e-05	5.8319e-07
database_2016_09_04_Traj2_L.mat	E1_LT1D14.999F0001.xls	2	0.050138	53.4042	0.866381	7.09864e-05	2.0253e-07
database_2016_09_04_Traj2_L.mat	E2_LT1D10.080F0001.xls	2	0.0519714	31.8282	0.933808	0.000126027	1.66552e-05
database_2016_09_04_Traj2_L.mat	E2_LT1D10.229F0001.xls	2	0.0499325	22.0912	0.939224	0.000136571	7.95947e-06
database_2016_09_04_Traj2_L.mat	E2_LT1D10.430F0001.xls	2	0.0999233	40.5732	0.866736	8.73766e-05	4.83009e-06
database_2016_09_04_Traj2_L.mat	E2_LT1D10.632F0001.xls	2	0.0749678	27.5792	1.09077	8.26253e-05	2.41329e-06
database_2016_09_04_Traj2_L.mat	E2_LT1D10.835F0001.xls	2	0.055722	35.1923	0.943356	9.88673e-05	8.06242e-07
database_2016_09_04_Traj2_L.mat	E2_LT1D11.035F0001.xls	2	0.0466529	31.3953	0.999906	7.82638e-05	2.82869e-06
database_2016_09_04_Traj2_L.mat	E2_LT1D11.235F0001.xls	2	0.110986	97.6074	0.848403	0.000834145	2.15188e-07
database_2016_09_04_Traj2_L.mat	E2_LT1D11.400F0001.xls	2	0.0799395	51.7134	1.00698	0.000907454	1.95129e-06
database_2016_09_04_Traj2_L.mat	E2_LT1D11.601F0001.xls	2	0.0580534	32.231	0.9206	0.000296506	5.97682e-07
database_2016_09_04_Traj2_L.mat	E2_LT1D11.788F0002.xls	2	0.129091	75.103	1.12351	0.000957135	1.69239e-07
database_2016_09_04_Traj2_L.mat	E2_LT1D12.034F0001.xls	2	0.0624312	74.5948	0.862593	7.95157e-05	7.96392e-07
database_2016_09_04_Traj2_L.mat	E2_LT1D12.235F0001.xls	2	0.0377927	34.3284	0.948879	5.94131e-05	2.23208e-06
database_2016_09_04_Traj2_L.mat	E2_LT1D12.436F0001.xls	2	0.0405861	23.3272	0.931748	7.99045e-05	2.27087e-05
database_2016_09_04_Traj2_L.mat	E2_LT1D12.637F0001.xls	2	0.283816	19.9444	1.14837	0.000909007	2.66509e-07
database_2016_09_04_Traj2_L.mat	E2_LT1D12.838F0001.xls	2	0.0844203	57.0367	1.07021	0.000533335	6.17758e-06
database_2016_09_04_Traj2_L.mat	E2_LT1D13.040F0001.xls	2	0.0901384	75.0857	0.988781	0.000568694	6.48992e-08
database_2016_09_04_Traj2_L.mat	E2_LT1D13.242F0001.xls	2	0.773621	9.01935	2.27379	0.000491343	9.49691e-07
database_2016_09_04_Traj2_L.mat	E2_LT1D13.443F0001.xls	2	0.0529275	51.1975	0.999437	0.000239448	3.09342e-07
database_2016_09_04_Traj2_L.mat	E2_LT1D13.644F0001.xls	2	0.174473	27.9842	1.79072	0.000497314	8.31862e-07
database_2016_09_04_Traj2_L.mat	E2_LT1D14.039F0001.xls	2	0.0841813	63.0402	0.943448	0.000277623	1.86143e-07
database_2016_09_04_Traj2_L.mat	E2_LT1D14.181F0001.xls	2	0.0701437	60.7196	0.983668	0.000335796	1.61677e-07
database_2016_09_04_Traj2_L.mat	E2_LT1D14.308F0001.xls	2	0.316496	28.4932	0.932063	0.000275469	4.70995e-06
database_2016_09_04_Traj2_L.mat	E2_LT1D14.440F0002.xls	2	0.568699	20.6499	3.18297	0.000891033	1.0183e-07
database_2016_09_04_Traj2_L.mat	E2_LT1D14.726F0001.xls	2	0.0426885	46.8047	0.911028	7.25957e-05	1.9101e-07
database_2016_09_04_Traj2_L.mat	E2_LT1D14.829F0001.xls	2	0.0742164	33.5241	0.846175	6.36366e-05	2.38536e-06
database_2016_09_04_Traj2_L.mat	E2_LT1D14.999F0001.xls	2	0.0796481	37.7946	0.905298	6.58436e-05	1.09974e-07
database_2016_09_04_Traj2_L.mat	E1_LT1D11.035F0001.xls	3	0.0436664	47.5432	0.910649	8.09975e-05	8.99701e-08
database_2016_09_04_Traj2_L.mat	E1_LT1D11.400F0001.xls	3	0.636115	2.46933	1.52288	0.000238045	8.62253e-06
database_2016_09_04_Traj2_L.mat	E1_LT1D11.601F0001.xls	3	0	0.718746	0.630052	0.000297471	1.37934e-05
database_2016_09_04_Traj2_L.mat	E1_LT1D11.788F0002.xls	3	0.0328291	56.3729	0.892025	0.000108826	1.19665e-07
database_2016_09_04_Traj2_L.mat	E1_LT1D12.436F0001.xls	3	0.0582911	44.6423	0.927867	4.80598e-05	1.03861e-06
database_2016_09_04_Traj2_L.mat	E1_LT1D12.637F0001.xls	3	0.181803	3.40779	1.86473	0.000134468	3.76303e-06
database_2016_09_04_Traj2_L.mat	E1_LT1D13.443F0001.xls	3	0.494455	5.16144	1.89033	0.000328056	1.69159e-06
database_2016_09_04_Traj2_L.mat	E1_LT1D14.039F0001.xls	3	0.61181	0.649918	0.644859	0.000101487
database_2016_09_04_Traj2_L.mat	E1_LT1D14.181F0001.xls	3	0.0368069	22.5903	0.956521	0.000209073	2.43198e-06
database_2016_09_04_Traj2_L.mat	E1_LT1D14.308F0001.xls	3	0.448549	2.37223	0.873848	9.39066e-05	2.22876e-06
database_2016_09_04_Traj2_L.mat	E1_LT1D14.440F0002.xls	3	0.0447809	52.7962	0.97447	0.000105045	1.81032e-07
database_2016_09_04_Traj2_L.mat	E1_LT1D14.726F0001.xls	3	0.0234684	31.4995	0.89127	0.000167389	1.30897e-06
database_2016_09_04_Traj2_L.mat	E1_LT1D14.829F0001.xls	3	0.141555	19.6038	0.834854	9.08533e-05	1.0306e-06
database_2016_09_04_Traj2_L.mat	E1_LT1D14.999F0001.xls	3	0.0385966	55.4262	0.965103	7.09864e-05	2.25382e-07
database_2016_09_04_Traj2_L.mat	E2_LT1D10.080F0001.xls	3	0.0402721	36.2953	0.979278	0.000126027	9.90565e-06
database_2016_09_04_Traj2_L.mat	E2_LT1D10.229F0001.xls	3	0.0852942	36.1399	0.886661	0.000136571	3.51695e-06
database_2016_09_04_Traj2_L.mat	E2_LT1D10.430F0001.xls	3	0.0573434	50.2546	0.978531	8.73766e-05	5.9944e-06
database_2016_09_04_Traj2_L.mat	E2_LT1D10.632F0001.xls	3	0.0362051	39.2441	0.952871	8.26253e-05	6.14097e-07
database_2016_09_04_Traj2_L.mat	E2_LT1D10.835F0001.xls	3	0.0905395	41.0691	0.910778	9.88673e-05	6.00521e-07
database_2016_09_04_Traj2_L.mat	E2_LT1D11.035F0001.xls	3	0.0333292	34.4906	0.95313	7.82638e-05	3.00969e-06
database_2016_09_04_Traj2_L.mat	E2_LT1D11.601F0001.xls	3	0.0464073	20.5293	1.40328	0.000296506	1.43266e-06
database_2016_09_04_Traj2_L.mat	E2_LT1D12.235F0001.xls	3	0.0429582	46.225	0.896012	5.94131e-05	1.99941e-06
database_2016_09_04_Traj2_L.mat	E2_LT1D12.436F0001.xls	3	0.053277	27.1596	0.961487	7.99045e-05	2.38966e-05
database_2016_09_04_Traj2_L.mat	E2_LT1D12.637F0001.xls	3	0.767208	2.98726	3.04983	0.000909007	9.28712e-07
database_2016_09_04_Traj2_L.mat	E2_LT1D13.242F0001.xls	3	0.0709879	42.2441	1.22562	0.000491343	5.8031e-07
database_2016_09_04_Traj2_L.mat	E2_LT1D13.644F0001.xls	3	0.0660242	24.497	1.62617	0.000497314	1.0311e-06
database_2016_09_04_Traj2_L.mat	E2_LT1D14.308F0001.xls	3	0.0450967	38.2702	1.0604	0.000275469	5.31828e-06
database_2016_09_04_Traj2_L.mat	E2_LT1D14.440F0002.xls	3	0.347269	34.0605	1.37783	0.000891033	1.65236e-07
database_2016_09_04_Traj2_L.mat	E2_LT1D14.726F0001.xls	3	0.0923884	34.1284	0.821194	7.25957e-05	2.92418e-07
database_2016_09_04_Traj2_L.mat	E2_LT1D14.829F0001.xls	3	0.055553	43.3252	0.965398	6.36366e-05	1.12625e-06
database_2016_09_04_Traj2_L.mat	E2_LT1D14.999F0001.xls	3	0.0424411	54.5526	0.939612	6.58436e-05	5.42832e-08
database_2016_09_04_Traj2_L.mat	E1_LT1D11.400F0001.xls	4	0.0276713	40.3607	0.93905	0.000238045	9.93872e-07
database_2016_09_04_Traj2_L.mat	E1_LT1D12.436F0001.xls	4	0.0398278	43.1431	1.01647	4.80598e-05	9.56543e-07
database_2016_09_04_Traj2_L.mat	E1_LT1D12.637F0001.xls	4	0.0387529	50.8547	0.965689	0.000134468	1.4041e-07
database_2016_09_04_Traj2_L.mat	E1_LT1D13.443F0001.xls	4	0.0422141	35.567	0.992461	0.000328056	3.481e-07
database_2016_09_04_Traj2_L.mat	E1_LT1D14.039F0001.xls	4	0.0334505	32.8673	0.916452	0.000101487	9.43449e-08
database_2016_09_04_Traj2_L.mat	E1_LT1D14.181F0001.xls	4	0.254511	14.8187	2.444	0.000209073	2.65172e-06
database_2016_09_04_Traj2_L.mat	E1_LT1D14.308F0001.xls	4	0.0183908	24.6991	0.961018	9.39066e-05	1.21226e-07
database_2016_09_04_Traj2_L.mat	E1_LT1D14.726F0001.xls	4	0.032501	37.0582	0.940346	0.000167389	8.18432e-07
database_2016_09_04_Traj2_L.mat	E1_LT1D14.829F0001.xls	4	0.0285464	34.1952	0.908888	9.08533e-05	4.89839e-07
database_2016_09_04_Traj2_L.mat	E2_LT1D10.229F0001.xls	4	0.0292523	30.1336	1.10354	0.000136571	8.46549e-06
database_2016_09_04_Traj2_L.mat	E2_LT1D10.632F0001.xls	4	0.0183976	26.9126	0.992665	8.26253e-05	1.57714e-06
database_2016_09_04_Traj2_L.mat	E2_LT1D10.835F0001.xls	4	0.0353335	39.2476	0.937721	9.88673e-05	9.37479e-07
database_2016_09_04_Traj2_L.mat	E2_LT1D11.035F0001.xls	4	0.0383599	30.0687	1.06032	7.82638e-05	3.7805e-06
database_2016_09_04_Traj2_L.mat	E2_LT1D11.601F0001.xls	4	0.0347407	27.7146	1.4001	0.000296506	8.78121e-07
database_2016_09_04_Traj2_L.mat	E2_LT1D12.235F0001.xls	4	0.0285734	33.8549	0.953517	5.94131e-05	3.55664e-06
database_2016_09_04_Traj2_L.mat	E2_LT1D12.436F0001.xls	4	0.0191695	23.3272	0.977828	7.99045e-05	1.98393e-05
database_2016_09_04_Traj2_L.mat	E2_LT1D12.637F0001.xls	4	0.0438947	21.0866	1.12285	0.000909007	5.26589e-07
database_2016_09_04_Traj2_L.mat	E1_LT1D14.039F0001.xls	5	0.0464818	46.4227	0.887549	0.000101487	8.78589e-08
database_2016_09_04_Traj2_L.mat	E1_LT1D14.181F0001.xls	5	0.00220889	6.05922	3.19957	0.000209073	1.40669e-05
database_2016_09_04_Traj2_L.mat	E1_LT1D14.308F0001.xls	5	0.0373587	41.5838	1.01065	9.39066e-05	1.85374e-07
database_2016_09_04_Traj2_L.mat	E2_LT1D11.601F0001.xls	5	0.021823	10.2647	2.2813	0.000296506	1.90425e-06
database_2016_09_04_Traj2_L.mat	E2_LT1D12.637F0001.xls	5	0.0542561	11.5976	1.67855	0.000909007	5.90235e-07
database_2016_09_11_Traj1_L_updatedGPeBorder.mat	E1_LT1D10.226F0001.xls	1	0.151156	24.7059	0.810522	0.000118554	3.24062e-06
database_2016_09_11_Traj1_L_updatedGPeBorder.mat	E1_LT1D10.428F0001.xls	1	0.0504585	43.5649	0.999983	5.58778e-05	5.9674e-07
database_2016_09_11_Traj1_L_updatedGPeBorder.mat	E1_LT1D11.032F0001.xls	1	0.0591058	67.9566	0.874004	0.00016863	7.6599e-07
database_2016_09_11_Traj1_L_updatedGPeBorder.mat	E1_LT1D11.233F0001.xls	1	0.0441014	44.149	0.842849	6.52145e-05	2.69062e-07
database_2016_09_11_Traj1_L_updatedGPeBorder.mat	E1_LT1D11.606F0001.xls	1	0.0437745	52.6751	0.940285	7.373e-05	3.4325e-07
database_2016_09_11_Traj1_L_updatedGPeBorder.mat	E1_LT1D11.731F0002.xls	1	0.0572088	43.1018	0.863745	9.84144e-05	1.00638e-08
database_2016_09_11_Traj1_L_updatedGPeBorder.mat	E1_LT1D11.895F0002.xls	1	0.611868	8.05935	9.95481	0.000684388	1.2652e-07
database_2016_09_11_Traj1_L_updatedGPeBorder.mat	E1_LT1D11.967F0001.xls	1	0.100914	108.168	0.791427	0.00162263	3.20891e-09
database_2016_09_11_Traj1_L_updatedGPeBorder.mat	E1_LT1D12.101F0001.xls	1	0.0351142	52.6379	0.890269	6.85359e-05	2.72908e-07
database_2016_09_11_Traj1_L_updatedGPeBorder.mat	E1_LT1D12.271F0001.xls	1	0.0453713	48.9245	0.91126	5.68627e-05	7.53504e-08
database_2016_09_11_Traj1_L_updatedGPeBorder.mat	E1_LT1D12.405F0001.xls	1	0.0876736	66.8944	0.908571	7.24134e-05	8.80937e-08
database_2016_09_11_Traj1_L_updatedGPeBorder.mat	E1_LT1D12.531F0001.xls	1	0.216318	33.7539	0.907281	0.000125242	1.38126e-08
database_2016_09_11_Traj1_L_updatedGPeBorder.mat	E1_LT1D12.678F0001.xls	1	0.304276	23.1695	1.21597	6.96441e-05	1.44833e-07
database_2016_09_11_Traj1_L_updatedGPeBorder.mat	E1_LT1D12.837F0001.xls	1	0.044483	44.8942	0.928834	5.6029e-05	2.36886e-07
database_2016_09_11_Traj1_L_updatedGPeBorder.mat	E1_LT1D13.079F0001.xls	1	0.0373751	43.6884	0.909807	5.12147e-05	1.18843e-07
database_2016_09_11_Traj1_L_updatedGPeBorder.mat	E1_LT1D13.666F0002.xls	1	0.127524	48.8585	0.836343	7.58434e-05	1.91283e-07
database_2016_09_11_Traj1_L_updatedGPeBorder.mat	E1_LT1D13.802F0003.xls	1	0.370126	3.23725	0.00443656	0.013922	0.0945833
database_2016_09_11_Traj1_L_updatedGPeBorder.mat	E1_LT1D13.981F0001.xls	1	0.0497877	40.7767	0.867178	4.61731e-05	1.87287e-06
database_2016_09_11_Traj1_L_updatedGPeBorder.mat	E1_LT1D14.208F0001.xls	1	0.0647491	63.3419	0.856527	5.98157e-05	3.20584e-08
database_2016_09_11_Traj1_L_updatedGPeBorder.mat	E1_LT1D14.723F0001.xls	1	0.307442	2.81025	0.756451	0.000893161	3.31331e-06
database_2016_09_11_Traj1_L_updatedGPeBorder.mat	E1_LT1D14.818F0002.xls	1	0.0419817	34.1476	0.953881	0.000243374	3.66687e-07
database_2016_09_11_Traj1_L_updatedGPeBorder.mat	E1_LT1D14.920F0002.xls	1	0.0734702	64.6701	0.855864	0.00019801	2.14889e-07
database_2016_09_11_Traj1_L_updatedGPeBorder.mat	E1_LT1D15.000F0001.xls	1	0.0780179	65.6395	0.910357	0.000176482	5.90596e-08
database_2016_09_11_Traj1_L_updatedGPeBorder.mat	E1_LT1D9.458F0001.xls	1	0.0241807	37.3167	0.910096	7.16133e-05	7.77529e-07
database_2016_09_11_Traj1_L_updatedGPeBorder.mat	E1_LT1D9.596F0001.xls	1	0.0269716	43.9529	0.936247	0.000136171	1.4475e-07
database_2016_09_11_Traj1_L_updatedGPeBorder.mat	E1_LT1D9.886F0001.xls	1	0.624033	28.2404	0.573494	0.00018381	5.13044e-07
database_2016_09_11_Traj1_L_updatedGPeBorder.mat	E2_LT1D10.226F0001.xls	1	0.46405	31.6671	0.966227	0.000921409	5.75441e-06
database_2016_09_11_Traj1_L_updatedGPeBorder.mat	E2_LT1D10.428F0001.xls	1	0.321929	16.5746	3.87832	0.000133711	1.11489e-05
database_2016_09_11_Traj1_L_updatedGPeBorder.mat	E2_LT1D11.032F0001.xls	1	0.0601252	46.5618	0.979922	7.28718e-05	1.61456e-07
database_2016_09_11_Traj1_L_updatedGPeBorder.mat	E2_LT1D11.233F0001.xls	1	0.0332197	35.7331	0.887029	0.000241749	3.92218e-06
database_2016_09_11_Traj1_L_updatedGPeBorder.mat	E2_LT1D11.606F0001.xls	1	0.0450053	43.2264	0.933148	0.000286697	7.82382e-07
database_2016_09_11_Traj1_L_updatedGPeBorder.mat	E2_LT1D11.731F0002.xls	1	0.458065	2.97461	0.604266	0.000406477	9.31735e-07
database_2016_09_11_Traj1_L_updatedGPeBorder.mat	E2_LT1D11.967F0001.xls	1	0.234455	13.5245	2.26856	0.000367766	2.07026e-07
database_2016_09_11_Traj1_L_updatedGPeBorder.mat	E2_LT1D12.101F0001.xls	1	0.0372753	41.3829	0.94907	0.0001427	2.1309e-07
database_2016_09_11_Traj1_L_updatedGPeBorder.mat	E2_LT1D12.271F0001.xls	1	0.328066	10.1908	2.30628	0.000481616	4.30451e-07
database_2016_09_11_Traj1_L_updatedGPeBorder.mat	E2_LT1D12.405F0001.xls	1	0.045019	36.8717	0.925362	0.000153669	1.7075e-07
database_2016_09_11_Traj1_L_updatedGPeBorder.mat	E2_LT1D12.531F0001.xls	1	0.0408854	38.1844	0.910187	0.000107031	2.78771e-08
database_2016_09_11_Traj1_L_updatedGPeBorder.mat	E2_LT1D12.678F0001.xls	1	0.0416645	38.8558	0.882984	0.00012553	2.54809e-07
database_2016_09_11_Traj1_L_updatedGPeBorder.mat	E2_LT1D12.837F0001.xls	1	0.0423075	46.4141	0.914326	8.08064e-05	8.02688e-08
database_2016_09_11_Traj1_L_updatedGPeBorder.mat	E2_LT1D13.079F0001.xls	1	0.0364752	57.281	0.83389	4.84646e-05	3.6421e-07
database_2016_09_11_Traj1_L_updatedGPeBorder.mat	E2_LT1D13.666F0002.xls	1	0.033709	33.1606	0.922524	6.47876e-05	3.47552e-07
database_2016_09_11_Traj1_L_updatedGPeBorder.mat	E2_LT1D13.802F0003.xls	1	0.0404668	41.8256	1.09067	0.00319584	4.18899e-05
database_2016_09_11_Traj1_L_updatedGPeBorder.mat	E2_LT1D13.896F0003.xls	1	0.0982554	160.091	0.644639	0.000178818	8.46552e-09
database_2016_09_11_Traj1_L_updatedGPeBorder.mat	E2_LT1D13.981F0001.xls	1	0.0480126	48.4683	0.903601	5.58929e-05	1.59757e-06
database_2016_09_11_Traj1_L_updatedGPeBorder.mat	E2_LT1D14.208F0001.xls	1	0.0553665	55.3644	0.914648	5.27873e-05	4.89425e-08
database_2016_09_11_Traj1_L_updatedGPeBorder.mat	E2_LT1D14.723F0001.xls	1	0.0399918	45.0969	0.929293	6.25558e-05	2.41013e-07
database_2016_09_11_Traj1_L_updatedGPeBorder.mat	E2_LT1D14.818F0002.xls	1	0.0365199	39.9733	0.900426	6.18222e-05	2.89723e-07
database_2016_09_11_Traj1_L_updatedGPeBorder.mat	E2_LT1D14.920F0002.xls	1	0.0418924	44.7501	0.944063	6.42953e-05	3.74286e-07
database_2016_09_11_Traj1_L_updatedGPeBorder.mat	E2_LT1D15.000F0001.xls	1	0.039417	38.054	0.917288	6.39584e-05	8.69497e-08
database_2016_09_11_Traj1_L_updatedGPeBorder.mat	E2_LT1D8.667F0001.xls	1	0.0465027	55.7674	0.89558	4.34941e-05	5.10849e-07
database_2016_09_11_Traj1_L_updatedGPeBorder.mat	E2_LT1D8.849F0001.xls	1	0.0396895	41.6577	0.90297	6.18838e-05	7.91007e-08
database_2016_09_11_Traj1_L_updatedGPeBorder.mat	E2_LT1D9.028F0001.xls	1	0.0342092	41.6475	0.854669	6.24588e-05	3.65784e-07
database_2016_09_11_Traj1_L_updatedGPeBorder.mat	E2_LT1D9.188F0001.xls	1	0.0332604	42.4356	0.917564	5.95627e-05	1.23752e-08
database_2016_09_11_Traj1_L_updatedGPeBorder.mat	E2_LT1D9.317F0001.xls	1	0.0516048	42.4216	0.936781	5.11208e-05	1.13141e-06
database_2016_09_11_Traj1_L_updatedGPeBorder.mat	E2_LT1D9.458F0001.xls	1	0.0251441	31.6639	0.947901	4.87818e-05	3.64344e-07
database_2016_09_11_Traj1_L_updatedGPeBorder.mat	E2_LT1D9.596F0001.xls	1	0.030347	31.8508	0.84849	0.000143503	3.29088e-07
database_2016_09_11_Traj1_L_updatedGPeBorder.mat	E2_LT1D9.720F0002.xls	1	0.0016713	2.69673	1.95093	0.0114673	0.000560241
database_2016_09_11_Traj1_L_updatedGPeBorder.mat	E1_LT1D10.226F0001.xls	2	0.0653445	75.9255	0.771111	0.000118554	4.67286e-06
database_2016_09_11_Traj1_L_updatedGPeBorder.mat	E1_LT1D10.428F0001.xls	2	0.0531415	39.9909	0.937888	5.58778e-05	4.51193e-07
database_2016_09_11_Traj1_L_updatedGPeBorder.mat	E1_LT1D11.032F0001.xls	2	0.0762424	39.7584	0.878465	0.00016863	1.27967e-06
database_2016_09_11_Traj1_L_updatedGPeBorder.mat	E1_LT1D11.233F0001.xls	2	0.0375765	34.6885	0.897735	6.52145e-05	4.15197e-07
database_2016_09_11_Traj1_L_updatedGPeBorder.mat	E1_LT1D11.606F0001.xls	2	0.0283521	28.8516	0.866197	7.373e-05	8.86101e-07
database_2016_09_11_Traj1_L_updatedGPeBorder.mat	E1_LT1D11.731F0002.xls	2	0.0546275	62.8793	0.901389	9.84144e-05	1.67133e-08
database_2016_09_11_Traj1_L_updatedGPeBorder.mat	E1_LT1D11.967F0001.xls	2	0.30694	28.3429	1.05788	0.00162263	2.357e-08
database_2016_09_11_Traj1_L_updatedGPeBorder.mat	E1_LT1D12.101F0001.xls	2	0.0808869	48.8549	0.917266	6.85359e-05	1.68064e-07
database_2016_09_11_Traj1_L_updatedGPeBorder.mat	E1_LT1D12.271F0001.xls	2	0.0542902	26.0993	0.950591	5.68627e-05	1.24677e-07
database_2016_09_11_Traj1_L_updatedGPeBorder.mat	E1_LT1D12.405F0001.xls	2	0.074168	109.418	0.77856	7.24134e-05	1.12742e-07
database_2016_09_11_Traj1_L_updatedGPeBorder.mat	E1_LT1D12.531F0001.xls	2	0.114125	145.135	0.717339	0.000125242	3.67167e-09
database_2016_09_11_Traj1_L_updatedGPeBorder.mat	E1_LT1D12.678F0001.xls	2	0.105543	137.306	0.749856	6.96441e-05	1.48084e-07
database_2016_09_11_Traj1_L_updatedGPeBorder.mat	E1_LT1D12.837F0001.xls	2	0.0444166	48.6633	0.975839	5.6029e-05	1.89367e-07
database_2016_09_11_Traj1_L_updatedGPeBorder.mat	E1_LT1D13.079F0001.xls	2	0.0429417	43.8068	0.906643	5.12147e-05	1.98516e-07
database_2016_09_11_Traj1_L_updatedGPeBorder.mat	E1_LT1D13.666F0002.xls	2	0.07404	94.7473	0.798622	7.58434e-05	7.89727e-08
database_2016_09_11_Traj1_L_updatedGPeBorder.mat	E1_LT1D13.981F0001.xls	2	0.0481158	37.5911	0.866693	4.61731e-05	3.18265e-06
database_2016_09_11_Traj1_L_updatedGPeBorder.mat	E1_LT1D14.208F0001.xls	2	0.0356645	38.38	0.91036	5.98157e-05	4.60522e-08
database_2016_09_11_Traj1_L_updatedGPeBorder.mat	E1_LT1D14.723F0001.xls	2	0.147368	129.21	0.725171	0.000893161	1.17987e-07
database_2016_09_11_Traj1_L_updatedGPeBorder.mat	E1_LT1D14.818F0002.xls	2	0.0446097	29.5905	0.923204	0.000243374	4.07209e-07
database_2016_09_11_Traj1_L_updatedGPeBorder.mat	E1_LT1D14.920F0002.xls	2	0.0986119	24.0928	0.878324	0.00019801	1.14673e-06
database_2016_09_11_Traj1_L_updatedGPeBorder.mat	E1_LT1D15.000F0001.xls	2	0.0734338	26.9917	1.01879	0.000176482	6.72528e-08
database_2016_09_11_Traj1_L_updatedGPeBorder.mat	E1_LT1D9.458F0001.xls	2	0.0254633	32.3489	0.918267	7.16133e-05	1.016e-06
database_2016_09_11_Traj1_L_updatedGPeBorder.mat	E1_LT1D9.596F0001.xls	2	0.0733177	44.9178	0.916795	0.000136171	1.01576e-07
database_2016_09_11_Traj1_L_updatedGPeBorder.mat	E1_LT1D9.886F0001.xls	2	0.0962989	89.6004	0.839374	0.00018381	3.87988e-07
database_2016_09_11_Traj1_L_updatedGPeBorder.mat	E2_LT1D10.226F0001.xls	2	0.0597159	72.2967	0.744798	0.000921409	7.08459e-06
database_2016_09_11_Traj1_L_updatedGPeBorder.mat	E2_LT1D10.428F0001.xls	2	0.101956	119.705	0.911565	0.000133711	7.38425e-08
database_2016_09_11_Traj1_L_updatedGPeBorder.mat	E2_LT1D11.032F0001.xls	2	0.0257065	29.7088	0.942774	7.28718e-05	1.57579e-07
database_2016_09_11_Traj1_L_updatedGPeBorder.mat	E2_LT1D11.233F0001.xls	2	0.0336938	28.2712	0.939737	0.000241749	5.1938e-06
database_2016_09_11_Traj1_L_updatedGPeBorder.mat	E2_LT1D11.606F0001.xls	2	0.277209	3.233	0.557103	0.000286697	9.14054e-06
database_2016_09_11_Traj1_L_updatedGPeBorder.mat	E2_LT1D11.731F0002.xls	2	0.089497	130.811	0.730516	0.000406477	5.69209e-09
database_2016_09_11_Traj1_L_updatedGPeBorder.mat	E2_LT1D11.967F0001.xls	2	0.0866645	106.666	0.808784	0.000367766	2.02828e-09
database_2016_09_11_Traj1_L_updatedGPeBorder.mat	E2_LT1D12.101F0001.xls	2	0.0589255	16.3155	0.880299	0.0001427	3.73081e-07
database_2016_09_11_Traj1_L_updatedGPeBorder.mat	E2_LT1D12.271F0001.xls	2	0.108379	136.314	0.735691	0.000481616	1.09689e-07
database_2016_09_11_Traj1_L_updatedGPeBorder.mat	E2_LT1D12.405F0001.xls	2	0.0250977	25.9388	0.915616	0.000153669	4.7487e-07
database_2016_09_11_Traj1_L_updatedGPeBorder.mat	E2_LT1D12.531F0001.xls	2	0.0383903	26.233	0.961576	0.000107031	1.86135e-08
database_2016_09_11_Traj1_L_updatedGPeBorder.mat	E2_LT1D12.678F0001.xls	2	0.0180364	24.882	0.932508	0.00012553	4.63386e-07
database_2016_09_11_Traj1_L_updatedGPeBorder.mat	E2_LT1D12.837F0001.xls	2	0.0413724	30.6635	1.00932	8.08064e-05	1.88337e-07
database_2016_09_11_Traj1_L_updatedGPeBorder.mat	E2_LT1D13.079F0001.xls	2	0.032393	53.4939	0.957037	4.84646e-05	4.00137e-07
database_2016_09_11_Traj1_L_updatedGPeBorder.mat	E2_LT1D13.666F0002.xls	2	0.0294489	34.2212	0.872804	6.47876e-05	1.90501e-07
database_2016_09_11_Traj1_L_updatedGPeBorder.mat	E2_LT1D13.981F0001.xls	2	0.0419172	37.3079	0.874926	5.58929e-05	1.36137e-06
database_2016_09_11_Traj1_L_updatedGPeBorder.mat	E2_LT1D14.208F0001.xls	2	0.0441855	53.6867	0.912211	5.27873e-05	2.46035e-08
database_2016_09_11_Traj1_L_updatedGPeBorder.mat	E2_LT1D14.723F0001.xls	2	0.0447875	45.0358	0.928996	6.25558e-05	2.30635e-07
database_2016_09_11_Traj1_L_updatedGPeBorder.mat	E2_LT1D14.818F0002.xls	2	0.0358223	37.604	0.932108	6.18222e-05	3.77681e-07
database_2016_09_11_Traj1_L_updatedGPeBorder.mat	E2_LT1D14.920F0002.xls	2	0.064726	48.9335	0.817509	6.42953e-05	2.27918e-07
database_2016_09_11_Traj1_L_updatedGPeBorder.mat	E2_LT1D15.000F0001.xls	2	0.0319662	33.8601	0.963436	6.39584e-05	1.76553e-07
database_2016_09_11_Traj1_L_updatedGPeBorder.mat	E2_LT1D8.667F0001.xls	2	0.040311	57.986	0.884065	4.34941e-05	3.70256e-07
database_2016_09_11_Traj1_L_updatedGPeBorder.mat	E2_LT1D8.849F0001.xls	2	0.0440144	45.1513	0.843567	6.18838e-05	5.38124e-08
database_2016_09_11_Traj1_L_updatedGPeBorder.mat	E2_LT1D9.028F0001.xls	2	0.0342462	29.5186	0.924684	6.24588e-05	1.0256e-06
database_2016_09_11_Traj1_L_updatedGPeBorder.mat	E2_LT1D9.188F0001.xls	2	0.0493363	40.2872	0.936022	5.95627e-05	1.78707e-08
database_2016_09_11_Traj1_L_updatedGPeBorder.mat	E2_LT1D9.317F0001.xls	2	0.0377233	47.0689	0.882536	5.11208e-05	1.18772e-06
database_2016_09_11_Traj1_L_updatedGPeBorder.mat	E2_LT1D9.458F0001.xls	2	0.0361298	37.6731	0.886389	4.87818e-05	3.47228e-07
database_2016_09_11_Traj1_L_updatedGPeBorder.mat	E2_LT1D9.596F0001.xls	2	0.0215746	33.1377	0.952933	0.000143503	2.22229e-07
database_2016_09_11_Traj1_L_updatedGPeBorder.mat	E1_LT1D10.428F0001.xls	3	0.0372944	41.5364	0.91398	5.58778e-05	2.41683e-07
database_2016_09_11_Traj1_L_updatedGPeBorder.mat	E1_LT1D11.032F0001.xls	3	0.043935	58.9893	0.917788	0.00016863	8.35174e-07
database_2016_09_11_Traj1_L_updatedGPeBorder.mat	E1_LT1D11.233F0001.xls	3	0.0389319	47.9332	0.997063	6.52145e-05	2.21829e-07
database_2016_09_11_Traj1_L_updatedGPeBorder.mat	E1_LT1D11.606F0001.xls	3	0.0517122	45.6119	0.884655	7.373e-05	2.5673e-07
database_2016_09_11_Traj1_L_updatedGPeBorder.mat	E1_LT1D11.967F0001.xls	3	0.0564476	6.06035	4.65216	0.00162263	7.12691e-08
database_2016_09_11_Traj1_L_updatedGPeBorder.mat	E1_LT1D12.101F0001.xls	3	0.0462708	32.1016	0.966708	6.85359e-05	2.95801e-07
database_2016_09_11_Traj1_L_updatedGPeBorder.mat	E1_LT1D12.271F0001.xls	3	0.0577543	49.0181	0.873571	5.68627e-05	8.09334e-08
database_2016_09_11_Traj1_L_updatedGPeBorder.mat	E1_LT1D12.837F0001.xls	3	0.0419655	47.9932	0.876779	5.6029e-05	2.15712e-07
database_2016_09_11_Traj1_L_updatedGPeBorder.mat	E1_LT1D13.079F0001.xls	3	0.0330602	33.2695	0.896108	5.12147e-05	1.74189e-07
database_2016_09_11_Traj1_L_updatedGPeBorder.mat	E1_LT1D13.981F0001.xls	3	0.0438512	28.034	0.79078	4.61731e-05	2.39535e-06
database_2016_09_11_Traj1_L_updatedGPeBorder.mat	E1_LT1D14.208F0001.xls	3	0.0656011	53.6729	0.856208	5.98157e-05	5.38194e-08
database_2016_09_11_Traj1_L_updatedGPeBorder.mat	E1_LT1D14.818F0002.xls	3	0.115378	2.97728	0.926923	0.000243374	6.91372e-06
database_2016_09_11_Traj1_L_updatedGPeBorder.mat	E1_LT1D14.920F0002.xls	3	0.0351136	48.3124	1.0305	0.00019801	4.46861e-07
database_2016_09_11_Traj1_L_updatedGPeBorder.mat	E1_LT1D15.000F0001.xls	3	0.0345046	51.7191	0.905805	0.000176482	7.61026e-08
database_2016_09_11_Traj1_L_updatedGPeBorder.mat	E1_LT1D9.458F0001.xls	3	0.0492935	43.5554	0.859705	7.16133e-05	6.05523e-07
database_2016_09_11_Traj1_L_updatedGPeBorder.mat	E1_LT1D9.596F0001.xls	3	0.0426686	44.3817	0.952852	0.000136171	5.44736e-08
database_2016_09_11_Traj1_L_updatedGPeBorder.mat	E2_LT1D11.032F0001.xls	3	0.0443809	12.8558	1.60231	7.28718e-05	8.30188e-07
database_2016_09_11_Traj1_L_updatedGPeBorder.mat	E2_LT1D11.233F0001.xls	3	0.0262905	27.5355	0.87937	0.000241749	7.56907e-06
database_2016_09_11_Traj1_L_updatedGPeBorder.mat	E2_LT1D11.606F0001.xls	3	0.0508276	56.8768	0.801468	0.000286697	3.36799e-07
database_2016_09_11_Traj1_L_updatedGPeBorder.mat	E2_LT1D12.101F0001.xls	3	0.0364344	29.9297	0.890148	0.0001427	4.21308e-07
database_2016_09_11_Traj1_L_updatedGPeBorder.mat	E2_LT1D12.405F0001.xls	3	0.210236	9.57522	1.37715	0.000153669	7.11665e-07
database_2016_09_11_Traj1_L_updatedGPeBorder.mat	E2_LT1D12.531F0001.xls	3	0.422905	4.46095	1.32255	0.000107031	2.31107e-07
database_2016_09_11_Traj1_L_updatedGPeBorder.mat	E2_LT1D12.678F0001.xls	3	0.0337767	31.0846	0.944915	0.00012553	5.53226e-07
database_2016_09_11_Traj1_L_updatedGPeBorder.mat	E2_LT1D12.837F0001.xls	3	0.0345852	30.831	0.884997	8.08064e-05	1.98804e-07
database_2016_09_11_Traj1_L_updatedGPeBorder.mat	E2_LT1D13.079F0001.xls	3	0.0309636	44.381	0.900646	4.84646e-05	3.39851e-07
database_2016_09_11_Traj1_L_updatedGPeBorder.mat	E2_LT1D13.666F0002.xls	3	0.03382	28.4234	0.979538	6.47876e-05	2.86744e-07
database_2016_09_11_Traj1_L_updatedGPeBorder.mat	E2_LT1D13.981F0001.xls	3	0.0342072	42.0909	1.0179	5.58929e-05	1.30222e-06
database_2016_09_11_Traj1_L_updatedGPeBorder.mat	E2_LT1D14.208F0001.xls	3	0.0544825	35.2319	0.925121	5.27873e-05	6.13204e-08
database_2016_09_11_Traj1_L_updatedGPeBorder.mat	E2_LT1D14.723F0001.xls	3	0.04075	46.1357	0.976952	6.25558e-05	2.62506e-07
database_2016_09_11_Traj1_L_updatedGPeBorder.mat	E2_LT1D14.818F0002.xls	3	0.0450728	32.0151	0.893124	6.18222e-05	2.36163e-07
database_2016_09_11_Traj1_L_updatedGPeBorder.mat	E2_LT1D14.920F0002.xls	3	0.028772	41.9612	0.897995	6.42953e-05	2.61816e-07
database_2016_09_11_Traj1_L_updatedGPeBorder.mat	E2_LT1D15.000F0001.xls	3	0.0312574	39.9066	0.88694	6.39584e-05	1.09627e-07
database_2016_09_11_Traj1_L_updatedGPeBorder.mat	E2_LT1D8.667F0001.xls	3	0.0367796	56.9776	0.818985	4.34941e-05	3.07925e-07
database_2016_09_11_Traj1_L_updatedGPeBorder.mat	E2_LT1D8.849F0001.xls	3	0.0307228	39.4346	0.899938	6.18838e-05	7.39697e-08
database_2016_09_11_Traj1_L_updatedGPeBorder.mat	E2_LT1D9.028F0001.xls	3	0.0394986	35.8753	0.968314	6.24588e-05	3.74202e-07
database_2016_09_11_Traj1_L_updatedGPeBorder.mat	E2_LT1D9.188F0001.xls	3	0.0436315	28.1455	0.991853	5.95627e-05	2.08758e-08
database_2016_09_11_Traj1_L_updatedGPeBorder.mat	E2_LT1D9.317F0001.xls	3	0.0400937	33.0078	0.931704	5.11208e-05	1.18205e-06
database_2016_09_11_Traj1_L_updatedGPeBorder.mat	E2_LT1D9.458F0001.xls	3	0.0393521	31.4328	0.935256	4.87818e-05	2.21681e-07
database_2016_09_11_Traj1_L_updatedGPeBorder.mat	E2_LT1D9.596F0001.xls	3	0.04952	42.3605	0.92867	0.000143503	2.99612e-07
database_2016_09_11_Traj1_L_updatedGPeBorder.mat	E1_LT1D11.233F0001.xls	4	0.0233533	33.9526	1.0135	6.52145e-05	2.8669e-07
database_2016_09_11_Traj1_L_updatedGPeBorder.mat	E1_LT1D11.606F0001.xls	4	0.0222865	31.2459	0.955791	7.373e-05	3.84182e-07
database_2016_09_11_Traj1_L_updatedGPeBorder.mat	E1_LT1D12.101F0001.xls	4	0.0365404	41.2889	0.950824	6.85359e-05	3.22608e-07
database_2016_09_11_Traj1_L_updatedGPeBorder.mat	E1_LT1D12.271F0001.xls	4	0.0262062	34.1443	1.00805	5.68627e-05	5.43789e-08
database_2016_09_11_Traj1_L_updatedGPeBorder.mat	E1_LT1D13.079F0001.xls	4	0.0370112	33.9799	1.01572	5.12147e-05	8.91994e-08
database_2016_09_11_Traj1_L_updatedGPeBorder.mat	E1_LT1D13.981F0001.xls	4	0.0361626	30.264	0.921535	4.61731e-05	2.78364e-06
database_2016_09_11_Traj1_L_updatedGPeBorder.mat	E1_LT1D14.208F0001.xls	4	0.0270051	34.2362	0.869759	5.98157e-05	6.16724e-08
database_2016_09_11_Traj1_L_updatedGPeBorder.mat	E1_LT1D14.818F0002.xls	4	0.0124037	20.3549	0.924498	0.000243374	5.28096e-07
database_2016_09_11_Traj1_L_updatedGPeBorder.mat	E1_LT1D9.458F0001.xls	4	0.0245012	28.5363	1.03466	7.16133e-05	7.05625e-07
database_2016_09_11_Traj1_L_updatedGPeBorder.mat	E2_LT1D11.032F0001.xls	4	0.03529	27.6562	1.01975	7.28718e-05	2.43846e-07
database_2016_09_11_Traj1_L_updatedGPeBorder.mat	E2_LT1D11.233F0001.xls	4	0.0343491	42.3542	0.905938	0.000241749	2.12621e-06
database_2016_09_11_Traj1_L_updatedGPeBorder.mat	E2_LT1D11.606F0001.xls	4	0.0342659	41.071	1.05266	0.000286697	7.23648e-07
database_2016_09_11_Traj1_L_updatedGPeBorder.mat	E2_LT1D12.101F0001.xls	4	0.0251401	25.8238	1.01085	0.0001427	4.23402e-07
database_2016_09_11_Traj1_L_updatedGPeBorder.mat	E2_LT1D12.405F0001.xls	4	0.0340655	25.2957	0.973152	0.000153669	3.8129e-07
database_2016_09_11_Traj1_L_updatedGPeBorder.mat	E2_LT1D12.531F0001.xls	4	0.0215218	28.0973	1.01672	0.000107031	3.17218e-08
database_2016_09_11_Traj1_L_updatedGPeBorder.mat	E2_LT1D12.678F0001.xls	4	0.0258924	18.8932	0.963166	0.00012553	4.44261e-07
database_2016_09_11_Traj1_L_updatedGPeBorder.mat	E2_LT1D12.837F0001.xls	4	0.0204622	30.7473	1.00577	8.08064e-05	1.43273e-07
database_2016_09_11_Traj1_L_updatedGPeBorder.mat	E2_LT1D13.079F0001.xls	4	0.0265705	39.1736	0.917192	4.84646e-05	3.20667e-07
database_2016_09_11_Traj1_L_updatedGPeBorder.mat	E2_LT1D13.666F0002.xls	4	0.0180725	25.4538	0.989194	6.47876e-05	3.78782e-07
database_2016_09_11_Traj1_L_updatedGPeBorder.mat	E2_LT1D13.981F0001.xls	4	0.0613994	31.2493	0.960123	5.58929e-05	1.52587e-06
database_2016_09_11_Traj1_L_updatedGPeBorder.mat	E2_LT1D14.208F0001.xls	4	0.0339519	44.41	0.944692	5.27873e-05	4.99316e-08
database_2016_09_11_Traj1_L_updatedGPeBorder.mat	E2_LT1D14.818F0002.xls	4	0.0200343	28.4916	0.933685	6.18222e-05	4.92417e-07
database_2016_09_11_Traj1_L_updatedGPeBorder.mat	E2_LT1D15.000F0001.xls	4	0.023596	32.9596	0.95563	6.39584e-05	2.10755e-07
database_2016_09_11_Traj1_L_updatedGPeBorder.mat	E2_LT1D9.028F0001.xls	4	0.0206964	27.8381	0.995553	6.24588e-05	4.71383e-07
database_2016_09_11_Traj1_L_updatedGPeBorder.mat	E2_LT1D9.188F0001.xls	4	0.0269458	32.2732	0.93718	5.95627e-05	2.92279e-08
database_2016_09_11_Traj1_L_updatedGPeBorder.mat	E2_LT1D9.317F0001.xls	4	0.0223351	34.0803	1.04436	5.11208e-05	1.20456e-06
database_2016_09_11_Traj1_L_updatedGPeBorder.mat	E2_LT1D9.458F0001.xls	4	0.0382753	38.1354	0.954	4.87818e-05	2.13121e-07
database_2016_09_11_Traj1_L_updatedGPeBorder.mat	E2_LT1D9.596F0001.xls	4	0.066617	6.86347	0.928326	0.000143503	4.38063e-07
database_2016_09_11_Traj1_L_updatedGPeBorder.mat	E1_LT1D14.818F0002.xls	5	0.0372133	39.2515	0.916327	0.000243374	3.12459e-07
database_2016_09_11_Traj1_L_updatedGPeBorder.mat	E2_LT1D11.032F0001.xls	5	0.0303876	34.3542	0.988506	7.28718e-05	1.69491e-07
database_2016_09_11_Traj1_L_updatedGPeBorder.mat	E2_LT1D12.405F0001.xls	5	0.0322838	41.445	0.985032	0.000153669	2.92624e-07
database_2016_09_11_Traj1_L_updatedGPeBorder.mat	E2_LT1D12.531F0001.xls	5	0.037684	37.9181	0.912255	0.000107031	1.65663e-08
database_2016_09_11_Traj1_L_updatedGPeBorder.mat	E2_LT1D12.678F0001.xls	5	0.0901574	6.48785	1.25818	0.00012553	1.0942e-06
database_2016_10_19_Traj1_R_updatedGPeBorder.mat	E1_RT1D10.058F0001.xls	1	0.0843344	38.5522	0.840554	0.000206279	1.14624e-06
database_2016_10_19_Traj1_R_updatedGPeBorder.mat	E1_RT1D10.158F0001.xls	1	0.131378	30.0987	0.868976	5.78858e-05	4.47579e-07
database_2016_10_19_Traj1_R_updatedGPeBorder.mat	E1_RT1D10.359F0001.xls	1	0.0301202	22.3012	0.891282	6.50584e-05	6.94089e-07
database_2016_10_19_Traj1_R_updatedGPeBorder.mat	E1_RT1D10.559F0001.xls	1	0.0609244	24.7553	0.896131	6.20184e-05	3.41882e-06
database_2016_10_19_Traj1_R_updatedGPeBorder.mat	E1_RT1D11.060F0001.xls	1	0.0374695	24.4106	0.955363	6.15187e-05	5.61634e-08
database_2016_10_19_Traj1_R_updatedGPeBorder.mat	E1_RT1D11.333F0001.xls	1	0.0854073	26.0304	0.81892	6.97462e-05	1.62929e-07
database_2016_10_19_Traj1_R_updatedGPeBorder.mat	E1_RT1D11.826F0001.xls	1	0.0545166	26.4797	0.981887	0.000157159	1.22481e-06
database_2016_10_19_Traj1_R_updatedGPeBorder.mat	E1_RT1D12.026F0001.xls	1	0.825565	26.4965	1.93967	0.00046643	4.52172e-08
database_2016_10_19_Traj1_R_updatedGPeBorder.mat	E1_RT1D12.149F0001.xls	1	0.157937	39.2788	0.872344	9.47393e-05	9.90151e-07
database_2016_10_19_Traj1_R_updatedGPeBorder.mat	E1_RT1D12.350F0001.xls	1	0.0736081	43.5324	0.854	8.31623e-05	1.54232e-06
database_2016_10_19_Traj1_R_updatedGPeBorder.mat	E1_RT1D12.551F0001.xls	1	0.128772	57.1998	0.82356	6.67118e-05	9.82555e-07
database_2016_10_19_Traj1_R_updatedGPeBorder.mat	E1_RT1D12.752F0001.xls	1	0.0828604	25.2687	0.838634	6.51123e-05	2.28898e-07
database_2016_10_19_Traj1_R_updatedGPeBorder.mat	E1_RT1D12.953F0001.xls	1	0.10428	46.0297	0.8365	5.75046e-05	1.56991e-06
database_2016_10_19_Traj1_R_updatedGPeBorder.mat	E1_RT1D13.756F0001.xls	1	0.0145279	4.47752	0.849331	6.96691e-05	3.22717e-07
database_2016_10_19_Traj1_R_updatedGPeBorder.mat	E1_RT1D13.995F0001.xls	1	0.0595231	40.007	0.847287	6.02785e-05	9.91594e-07
database_2016_10_19_Traj1_R_updatedGPeBorder.mat	E1_RT1D14.095F0001.xls	1	0.0721623	49.7834	0.836003	6.18038e-05	2.03297e-06
database_2016_10_19_Traj1_R_updatedGPeBorder.mat	E1_RT1D14.196F0001.xls	1	0.124326	105.423	0.78603	0.00297542	9.67779e-08
database_2016_10_19_Traj1_R_updatedGPeBorder.mat	E1_RT1D14.597F0001.xls	1	0.0769895	40.335	0.882698	6.60939e-05	4.39479e-07
database_2016_10_19_Traj1_R_updatedGPeBorder.mat	E1_RT1D14.698F0001.xls	1	0.12028	74.4204	0.829491	7.47873e-05	1.65907e-06
database_2016_10_19_Traj1_R_updatedGPeBorder.mat	E1_RT1D14.799F0001.xls	1	0.107885	48.709	0.826641	7.2469e-05	1.53424e-06
database_2016_10_19_Traj1_R_updatedGPeBorder.mat	E1_RT1D14.899F0002.xls	1	0.0904352	38.9878	0.858024	5.34061e-05	9.31087e-07
database_2016_10_19_Traj1_R_updatedGPeBorder.mat	E1_RT1D9.762F0001.xls	1	0.121566	78.5368	0.806481	0.00045663	4.84582e-09
database_2016_10_19_Traj1_R_updatedGPeBorder.mat	E1_RT1D9.962F0001.xls	1	0.136418	83.6759	0.857646	0.000407532	5.45217e-07
database_2016_10_19_Traj1_R_updatedGPeBorder.mat	E2_RT1D11.333F0001.xls	1	0.244301	47.098	1.01338	0.000290985	6.15313e-07
database_2016_10_19_Traj1_R_updatedGPeBorder.mat	E2_RT1D11.826F0001.xls	1	0.177012	51.3693	0.759457	0.000122357	1.58016e-06
database_2016_10_19_Traj1_R_updatedGPeBorder.mat	E2_RT1D12.026F0001.xls	1	0.0780213	38.6957	0.957409	0.000140777	4.98155e-08
database_2016_10_19_Traj1_R_updatedGPeBorder.mat	E2_RT1D12.149F0001.xls	1	0.0461827	26.379	1.03974	0.000188518	1.8859e-06
database_2016_10_19_Traj1_R_updatedGPeBorder.mat	E2_RT1D12.350F0001.xls	1	0.0689348	27.6262	0.93362	0.000206271	4.41077e-07
database_2016_10_19_Traj1_R_updatedGPeBorder.mat	E2_RT1D12.551F0001.xls	1	0.0428061	27.8593	0.858435	0.000103668	1.56666e-06
database_2016_10_19_Traj1_R_updatedGPeBorder.mat	E2_RT1D12.752F0001.xls	1	0.0593662	22.0143	1.05376	0.000244816	1.36559e-07
database_2016_10_19_Traj1_R_updatedGPeBorder.mat	E2_RT1D12.953F0001.xls	1	0.035593	26.011	0.96601	0.000183369	1.23281e-06
database_2016_10_19_Traj1_R_updatedGPeBorder.mat	E2_RT1D13.756F0001.xls	1	0.121982	81.1034	0.837167	0.00419435	1.31559e-08
database_2016_10_19_Traj1_R_updatedGPeBorder.mat	E2_RT1D13.995F0001.xls	1	0.104156	46.8123	0.86745	9.28059e-05	5.44369e-07
database_2016_10_19_Traj1_R_updatedGPeBorder.mat	E2_RT1D14.095F0001.xls	1	0.0729767	42.4963	0.871919	6.06695e-05	1.31471e-06
database_2016_10_19_Traj1_R_updatedGPeBorder.mat	E2_RT1D14.196F0001.xls	1	0.113535	72.1098	0.790591	0.00273004	1.0199e-08
database_2016_10_19_Traj1_R_updatedGPeBorder.mat	E2_RT1D14.597F0001.xls	1	0.0914	36.1049	0.925388	4.71268e-05	9.42443e-08
database_2016_10_19_Traj1_R_updatedGPeBorder.mat	E2_RT1D14.698F0001.xls	1	0.0661903	34.4324	0.88619	5.99177e-05	9.79677e-07
database_2016_10_19_Traj1_R_updatedGPeBorder.mat	E2_RT1D14.799F0001.xls	1	0.155065	64.6246	0.777089	5.73184e-05	2.44256e-07
database_2016_10_19_Traj1_R_updatedGPeBorder.mat	E2_RT1D14.899F0002.xls	1	0.0683146	43.5415	0.736788	5.84655e-05	1.65083e-07
database_2016_10_19_Traj1_R_updatedGPeBorder.mat	E1_RT1D10.058F0001.xls	2	0.0870878	34.242	0.924683	0.000206279	1.40902e-06
database_2016_10_19_Traj1_R_updatedGPeBorder.mat	E1_RT1D10.158F0001.xls	2	0.060012	25.2441	0.918931	5.78858e-05	5.41528e-07
database_2016_10_19_Traj1_R_updatedGPeBorder.mat	E1_RT1D10.359F0001.xls	2	0.0647082	21.8164	0.837363	6.50584e-05	1.62264e-06
database_2016_10_19_Traj1_R_updatedGPeBorder.mat	E1_RT1D10.559F0001.xls	2	0.0784934	31.128	0.952659	6.20184e-05	2.90632e-06
database_2016_10_19_Traj1_R_updatedGPeBorder.mat	E1_RT1D11.060F0001.xls	2	0.0791387	23.2971	0.91252	6.15187e-05	5.98018e-08
database_2016_10_19_Traj1_R_updatedGPeBorder.mat	E1_RT1D11.333F0001.xls	2	0.0212526	20.2458	0.948884	6.97462e-05	3.50689e-07
database_2016_10_19_Traj1_R_updatedGPeBorder.mat	E1_RT1D11.826F0001.xls	2	0.0181276	17.7341	0.838185	0.000157159	1.25574e-06
database_2016_10_19_Traj1_R_updatedGPeBorder.mat	E1_RT1D12.026F0001.xls	2	0.130659	72.3015	0.831388	0.00046643	1.61267e-08
database_2016_10_19_Traj1_R_updatedGPeBorder.mat	E1_RT1D12.149F0001.xls	2	0.0980057	61.6895	0.970823	9.47393e-05	3.21814e-07
database_2016_10_19_Traj1_R_updatedGPeBorder.mat	E1_RT1D12.350F0001.xls	2	0.0850787	49.1574	1.0686	8.31623e-05	1.82182e-06
database_2016_10_19_Traj1_R_updatedGPeBorder.mat	E1_RT1D12.551F0001.xls	2	0.076974	44.8389	0.881936	6.67118e-05	9.67236e-07
database_2016_10_19_Traj1_R_updatedGPeBorder.mat	E1_RT1D12.752F0001.xls	2	0.0746573	38.254	0.926966	6.51123e-05	2.70809e-07
database_2016_10_19_Traj1_R_updatedGPeBorder.mat	E1_RT1D12.953F0001.xls	2	0.0445211	33.98	0.997682	5.75046e-05	1.56054e-06
database_2016_10_19_Traj1_R_updatedGPeBorder.mat	E1_RT1D13.756F0001.xls	2	0.552708	2.903	1.6595	6.96691e-05	7.08515e-07
database_2016_10_19_Traj1_R_updatedGPeBorder.mat	E1_RT1D13.995F0001.xls	2	0.0826879	34.7366	0.720743	6.02785e-05	1.17644e-06
database_2016_10_19_Traj1_R_updatedGPeBorder.mat	E1_RT1D14.095F0001.xls	2	0.0774374	50.7596	0.925518	6.18038e-05	1.89163e-06
database_2016_10_19_Traj1_R_updatedGPeBorder.mat	E1_RT1D14.597F0001.xls	2	0.089948	45.7921	0.802341	6.60939e-05	4.21985e-07
database_2016_10_19_Traj1_R_updatedGPeBorder.mat	E1_RT1D14.698F0001.xls	2	0.0792189	66.3683	0.866303	7.47873e-05	1.43822e-06
database_2016_10_19_Traj1_R_updatedGPeBorder.mat	E1_RT1D14.799F0001.xls	2	0.112466	43.5429	0.908533	7.2469e-05	1.77566e-06
database_2016_10_19_Traj1_R_updatedGPeBorder.mat	E1_RT1D14.899F0002.xls	2	0.075893	38.4943	0.879536	5.34061e-05	8.9608e-07
database_2016_10_19_Traj1_R_updatedGPeBorder.mat	E1_RT1D9.762F0001.xls	2	0.791974	4.65233	0.896383	0.00045663	4.11289e-07
database_2016_10_19_Traj1_R_updatedGPeBorder.mat	E1_RT1D9.962F0001.xls	2	0.374166	11.7468	1.08703	0.000407532	9.98072e-07
database_2016_10_19_Traj1_R_updatedGPeBorder.mat	E2_RT1D11.333F0001.xls	2	0.0770773	60.4715	0.916956	0.000290985	4.43917e-07
database_2016_10_19_Traj1_R_updatedGPeBorder.mat	E2_RT1D11.826F0001.xls	2	0.0876999	62.0309	1.03086	0.000122357	1.47878e-06
database_2016_10_19_Traj1_R_updatedGPeBorder.mat	E2_RT1D12.026F0001.xls	2	0.353637	5.6973	1.7041	0.000140777	6.23134e-07
database_2016_10_19_Traj1_R_updatedGPeBorder.mat	E2_RT1D12.149F0001.xls	2	0.0661311	25.411	0.869915	0.000188518	1.80591e-06
database_2016_10_19_Traj1_R_updatedGPeBorder.mat	E2_RT1D12.350F0001.xls	2	0.0680067	28.6041	0.836864	0.000206271	9.20588e-07
database_2016_10_19_Traj1_R_updatedGPeBorder.mat	E2_RT1D12.551F0001.xls	2	0.0643793	41.4256	0.903234	0.000103668	1.17552e-06
database_2016_10_19_Traj1_R_updatedGPeBorder.mat	E2_RT1D12.752F0001.xls	2	0.0129201	17.015	1.00595	0.000244816	9.17791e-08
database_2016_10_19_Traj1_R_updatedGPeBorder.mat	E2_RT1D12.953F0001.xls	2	0.0553044	17.8223	1.00141	0.000183369	1.1078e-06
database_2016_10_19_Traj1_R_updatedGPeBorder.mat	E2_RT1D13.995F0001.xls	2	0.0689628	36.7297	0.781191	9.28059e-05	1.00802e-06
database_2016_10_19_Traj1_R_updatedGPeBorder.mat	E2_RT1D14.095F0001.xls	2	0.0955328	47.1367	0.894028	6.06695e-05	1.20917e-06
database_2016_10_19_Traj1_R_updatedGPeBorder.mat	E2_RT1D14.597F0001.xls	2	0.11302	48.2191	0.861685	4.71268e-05	3.1581e-07
database_2016_10_19_Traj1_R_updatedGPeBorder.mat	E2_RT1D14.698F0001.xls	2	0.165283	41.5143	0.765427	5.99177e-05	2.32193e-07
database_2016_10_19_Traj1_R_updatedGPeBorder.mat	E2_RT1D14.799F0001.xls	2	0.0877742	62.9045	0.870216	5.73184e-05	5.21843e-07
database_2016_10_19_Traj1_R_updatedGPeBorder.mat	E2_RT1D14.899F0002.xls	2	0.15799	53.6273	0.751745	5.84655e-05	1.78084e-07
database_2016_10_19_Traj1_R_updatedGPeBorder.mat	E1_RT1D10.058F0001.xls	3	0.0464581	29.2134	0.897276	0.000206279	1.17145e-06
database_2016_10_19_Traj1_R_updatedGPeBorder.mat	E1_RT1D10.158F0001.xls	3	0.0678068	21.3604	0.931376	5.78858e-05	1.24089e-06
database_2016_10_19_Traj1_R_updatedGPeBorder.mat	E1_RT1D10.359F0001.xls	3	0.0919616	30.5429	0.868843	6.50584e-05	1.33697e-06
database_2016_10_19_Traj1_R_updatedGPeBorder.mat	E1_RT1D10.559F0001.xls	3	0.10166	24.02	0.904253	6.20184e-05	3.47327e-06
database_2016_10_19_Traj1_R_updatedGPeBorder.mat	E1_RT1D11.060F0001.xls	3	0.0999816	35.5024	0.923308	6.15187e-05	5.31296e-08
database_2016_10_19_Traj1_R_updatedGPeBorder.mat	E1_RT1D11.333F0001.xls	3	0.0861385	16.8908	0.921046	6.97462e-05	3.4966e-07
database_2016_10_19_Traj1_R_updatedGPeBorder.mat	E1_RT1D11.826F0001.xls	3	0.285685	9.23145	1.04051	0.000157159	1.67034e-06
database_2016_10_19_Traj1_R_updatedGPeBorder.mat	E1_RT1D12.350F0001.xls	3	0.142533	37.6629	0.734851	8.31623e-05	2.1862e-06
database_2016_10_19_Traj1_R_updatedGPeBorder.mat	E1_RT1D12.551F0001.xls	3	0.0425932	37.3253	0.871786	6.67118e-05	2.2786e-06
database_2016_10_19_Traj1_R_updatedGPeBorder.mat	E1_RT1D12.752F0001.xls	3	0.0518191	28.7782	0.940948	6.51123e-05	2.74879e-07
database_2016_10_19_Traj1_R_updatedGPeBorder.mat	E1_RT1D12.953F0001.xls	3	0.0649756	42.4148	0.845606	5.75046e-05	1.55205e-06
database_2016_10_19_Traj1_R_updatedGPeBorder.mat	E1_RT1D13.995F0001.xls	3	0.0614612	45.5169	0.875839	6.02785e-05	1.11228e-06
database_2016_10_19_Traj1_R_updatedGPeBorder.mat	E1_RT1D14.095F0001.xls	3	0.0553783	51.9798	0.951315	6.18038e-05	1.28257e-06
database_2016_10_19_Traj1_R_updatedGPeBorder.mat	E1_RT1D14.597F0001.xls	3	0.0607324	47.6902	1.02753	6.60939e-05	3.29586e-07
database_2016_10_19_Traj1_R_updatedGPeBorder.mat	E1_RT1D14.799F0001.xls	3	0.0725858	51.4151	0.81964	7.2469e-05	2.01836e-06
database_2016_10_19_Traj1_R_updatedGPeBorder.mat	E1_RT1D14.899F0002.xls	3	0.0665423	55.0271	0.94163	5.34061e-05	1.02464e-06
database_2016_10_19_Traj1_R_updatedGPeBorder.mat	E2_RT1D12.026F0001.xls	3	0.0689862	41.0282	0.893245	0.000140777	4.89172e-08
database_2016_10_19_Traj1_R_updatedGPeBorder.mat	E2_RT1D12.149F0001.xls	3	0.097278	3.38813	1.12504	0.000188518	6.97715e-06
database_2016_10_19_Traj1_R_updatedGPeBorder.mat	E2_RT1D12.350F0001.xls	3	0.262807	4.64512	0.695681	0.000206271	3.79258e-07
database_2016_10_19_Traj1_R_updatedGPeBorder.mat	E2_RT1D12.551F0001.xls	3	0.0382875	18.1691	0.920918	0.000103668	1.61198e-06
database_2016_10_19_Traj1_R_updatedGPeBorder.mat	E2_RT1D12.752F0001.xls	3	0.0414702	2.28037	0.727594	0.000244816	6.3283e-07
database_2016_10_19_Traj1_R_updatedGPeBorder.mat	E2_RT1D12.953F0001.xls	3	0.0847399	7.9478	1.27837	0.000183369	1.60574e-06
database_2016_10_19_Traj1_R_updatedGPeBorder.mat	E2_RT1D13.995F0001.xls	3	0.0682667	39.1303	1.04364	9.28059e-05	1.25239e-06
database_2016_10_19_Traj1_R_updatedGPeBorder.mat	E2_RT1D14.095F0001.xls	3	0.0799749	44.6944	0.866201	6.06695e-05	9.14639e-07
database_2016_10_19_Traj1_R_updatedGPeBorder.mat	E2_RT1D14.597F0001.xls	3	0.0468705	38.9553	1.1097	4.71268e-05	1.27169e-07
database_2016_10_19_Traj1_R_updatedGPeBorder.mat	E2_RT1D14.698F0001.xls	3	0.0448509	37.6071	0.871032	5.99177e-05	1.16048e-06
database_2016_10_19_Traj1_R_updatedGPeBorder.mat	E2_RT1D14.899F0002.xls	3	0.0605668	41.0815	0.768118	5.84655e-05	5.91706e-07
database_2016_10_19_Traj1_R_updatedGPeBorder.mat	E1_RT1D10.359F0001.xls	4	0.086939	27.8765	0.989685	6.50584e-05	5.36941e-07
database_2016_10_19_Traj1_R_updatedGPeBorder.mat	E1_RT1D10.559F0001.xls	4	0.0660202	13.2355	1.02507	6.20184e-05	8.17591e-06
database_2016_10_19_Traj1_R_updatedGPeBorder.mat	E1_RT1D11.060F0001.xls	4	0.0865638	33.1042	0.874616	6.15187e-05	4.25128e-08
database_2016_10_19_Traj1_R_updatedGPeBorder.mat	E1_RT1D11.333F0001.xls	4	0.0504975	21.2871	0.849257	6.97462e-05	1.43606e-07
database_2016_10_19_Traj1_R_updatedGPeBorder.mat	E1_RT1D11.826F0001.xls	4	0.0758893	30.3666	0.821258	0.000157159	1.64047e-06
database_2016_10_19_Traj1_R_updatedGPeBorder.mat	E1_RT1D13.995F0001.xls	4	0.0344764	32.1014	0.96931	6.02785e-05	1.61474e-06
database_2016_10_19_Traj1_R_updatedGPeBorder.mat	E2_RT1D12.149F0001.xls	4	0.000586807	5.0822	0.778363	0.000188518	6.20702e-06
database_2016_10_19_Traj1_R_updatedGPeBorder.mat	E2_RT1D12.350F0001.xls	4	0.0296558	25.6704	0.914875	0.000206271	6.5673e-07
database_2016_10_19_Traj1_R_updatedGPeBorder.mat	E2_RT1D12.551F0001.xls	4	0.0496904	24.4677	0.894591	0.000103668	1.21827e-06
database_2016_10_19_Traj1_R_updatedGPeBorder.mat	E2_RT1D12.752F0001.xls	4	0.0447649	21.1372	0.950352	0.000244816	9.9743e-08
database_2016_10_19_Traj1_R_updatedGPeBorder.mat	E2_RT1D12.953F0001.xls	4	0.0227485	16.3773	0.778597	0.000183369	1.35732e-06
database_2016_10_19_Traj1_R_updatedGPeBorder.mat	E1_RT1D10.359F0001.xls	5	0.0248733	9.21136	0.979862	6.50584e-05	2.44683e-06
database_2016_10_19_Traj1_R_updatedGPeBorder.mat	E1_RT1D11.060F0001.xls	5	0.0207045	13.3616	0.917722	6.15187e-05	6.9906e-08
database_2016_10_19_Traj1_R_updatedGPeBorder.mat	E1_RT1D11.826F0001.xls	5	0.0446673	31.8242	0.980248	0.000157159	1.67265e-06
database_2016_10_19_Traj1_R_updatedGPeBorder.mat	E2_RT1D12.149F0001.xls	5	0.0337988	22.7489	0.998906	0.000188518	2.43853e-06
database_2016_10_19_Traj1_R_updatedGPeBorder.mat	E2_RT1D12.551F0001.xls	5	0.0476434	16.2311	0.815857	0.000103668	1.58589e-06
database_2016_10_19_Traj1_R_updatedGPeBorder.mat	E2_RT1D12.752F0001.xls	5	0.0425236	30.6095	0.90232	0.000244816	6.33948e-08
database_2016_10_19_Traj1_R_updatedGPeBorder.mat	E2_RT1D12.953F0001.xls	5	0.0427506	23.6026	0.880475	0.000183369	1.64638e-06
database_2016_10_19_Traj2_L.mat	E1_LT1D10.283F0001.xls	1	0.44088	28.9766	1.29904	0.000193592	1.20287e-07
database_2016_10_19_Traj2_L.mat	E1_LT1D10.577F0001.xls	1	0.116974	47.4731	0.93693	0.000142099	9.63763e-07
database_2016_10_19_Traj2_L.mat	E1_LT1D10.879F0001.xls	1	0.0989541	49.554	0.848073	6.25196e-05	1.56012e-06
database_2016_10_19_Traj2_L.mat	E1_LT1D11.179F0001.xls	1	0.103553	47.7716	0.949073	9.42183e-05	3.11253e-06
database_2016_10_19_Traj2_L.mat	E1_LT1D11.480F0001.xls	1	0.0352999	23.959	0.863551	0.000171349	9.2791e-06
database_2016_10_19_Traj2_L.mat	E1_LT1D11.750F0001.xls	1	0.0713517	45.6185	0.915255	6.70359e-05	4.93958e-06
database_2016_10_19_Traj2_L.mat	E1_LT1D12.050F0001.xls	1	0.0808026	41.446	0.866681	9.21891e-05	5.03465e-07
database_2016_10_19_Traj2_L.mat	E1_LT1D12.352F0001.xls	1	0.0968778	57.1899	0.863956	0.000101266	7.35557e-07
database_2016_10_19_Traj2_L.mat	E1_LT1D12.655F0001.xls	1	0.0978399	55.6009	0.835492	8.87349e-05	2.58798e-07
database_2016_10_19_Traj2_L.mat	E1_LT1D13.057F0001.xls	1	0.0857028	46.848	0.806961	5.87483e-05	1.31219e-06
database_2016_10_19_Traj2_L.mat	E1_LT1D13.459F0001.xls	1	0.0849017	40.4266	0.873961	6.03285e-05	1.45816e-06
database_2016_10_19_Traj2_L.mat	E1_LT1D13.861F0001.xls	1	0.079896	38.7392	0.818485	0.000124255	8.17668e-07
database_2016_10_19_Traj2_L.mat	E1_LT1D14.194F0001.xls	1	0.877746	2.68661	0.46691	0.000186205	5.99596e-08
database_2016_10_19_Traj2_L.mat	E1_LT1D14.595F0001.xls	1	0.0285928	19.6757	0.930691	0.000134315	4.61803e-06
database_2016_10_19_Traj2_L.mat	E1_LT1D14.696F0001.xls	1	0.0651091	44.1914	0.950341	0.000149644	1.74818e-06
database_2016_10_19_Traj2_L.mat	E1_LT1D14.797F0001.xls	1	0.10638	35.1296	0.910455	8.704e-05	2.51792e-06
database_2016_10_19_Traj2_L.mat	E1_LT1D14.898F0001.xls	1	0.0781437	31.5721	0.986755	0.000223137	4.08864e-06
database_2016_10_19_Traj2_L.mat	E1_LT1D14.999F0001.xls	1	0.0880158	49.0637	0.898069	0.000352835	1.54332e-07
database_2016_10_19_Traj2_L.mat	E1_LT1D6.925F0001.xls	1	0.334218	34.4166	1.17946	0.000138805	1.73775e-06
database_2016_10_19_Traj2_L.mat	E1_LT1D7.125F0001.xls	1	0.446059	39.0342	0.821306	0.000300262	3.96359e-07
database_2016_10_19_Traj2_L.mat	E1_LT1D7.326F0001.xls	1	0.504688	30.1553	0.793566	0.000138008	2.27391e-06
database_2016_10_19_Traj2_L.mat	E1_LT1D7.527F0001.xls	1	0.108541	41.9522	0.927554	9.46383e-05	1.2761e-07
database_2016_10_19_Traj2_L.mat	E1_LT1D7.727F0001.xls	1	0.0619598	35.221	0.884361	4.24956e-05	1.13026e-06
database_2016_10_19_Traj2_L.mat	E1_LT1D7.927F0001.xls	1	0.0836108	37.1655	0.854355	6.77231e-05	2.81181e-06
database_2016_10_19_Traj2_L.mat	E1_LT1D8.127F0001.xls	1	0.245193	13.5768	0.956688	0.000162073	1.62351e-06
database_2016_10_19_Traj2_L.mat	E1_LT1D8.328F0001.xls	1	0.0644697	34.8777	0.926821	5.93045e-05	4.51232e-06
database_2016_10_19_Traj2_L.mat	E1_LT1D8.529F0001.xls	1	0.0254347	19.7935	1.13198	8.73506e-05	9.41353e-07
database_2016_10_19_Traj2_L.mat	E1_LT1D8.729F0001.xls	1	0.0624519	29.9972	0.838456	5.00855e-05	2.00535e-06
database_2016_10_19_Traj2_L.mat	E1_LT1D8.929F0001.xls	1	0.0988902	41.2155	0.862823	4.69687e-05	4.25859e-06
database_2016_10_19_Traj2_L.mat	E1_LT1D9.130F0001.xls	1	0.0400207	21.1347	0.92145	7.4634e-05	3.70235e-06
database_2016_10_19_Traj2_L.mat	E1_LT1D9.331F0001.xls	1	0.0986307	48.5532	0.842725	7.39574e-05	2.87811e-06
database_2016_10_19_Traj2_L.mat	E1_LT1D9.531F0002.xls	1	0.100538	33.6425	0.978271	5.44664e-05	3.51359e-06
database_2016_10_19_Traj2_L.mat	E1_LT1D9.580F0001.xls	1	0.135091	43.8389	0.772195	0.000123846	3.10528e-06
database_2016_10_19_Traj2_L.mat	E1_LT1D9.681F0001.xls	1	0.0443787	29.2779	0.926763	8.93251e-05	8.34894e-07
database_2016_10_19_Traj2_L.mat	E1_LT1D9.982F0001.xls	1	0.107753	56.6205	0.865136	7.22329e-05	1.33663e-06
database_2016_10_19_Traj2_L.mat	E2_LT1D10.283F0001.xls	1	0.173894	92.9235	0.836786	0.00155229	3.47734e-08
database_2016_10_19_Traj2_L.mat	E2_LT1D10.577F0001.xls	1	0.114848	55.8354	0.869447	0.000369764	1.40641e-06
database_2016_10_19_Traj2_L.mat	E2_LT1D10.879F0001.xls	1	0.135189	56.419	0.827709	7.0617e-05	9.06045e-07
database_2016_10_19_Traj2_L.mat	E2_LT1D11.179F0001.xls	1	0.143453	40.8591	0.809888	5.73697e-05	8.39158e-08
database_2016_10_19_Traj2_L.mat	E2_LT1D11.480F0001.xls	1	0.055355	34.0218	0.781165	5.07702e-05	3.00857e-06
database_2016_10_19_Traj2_L.mat	E2_LT1D11.750F0001.xls	1	0.108545	45.9942	0.820131	5.34769e-05	1.61813e-06
database_2016_10_19_Traj2_L.mat	E2_LT1D12.050F0001.xls	1	0.0366984	25.5533	0.98482	0.000258239	7.46557e-07
database_2016_10_19_Traj2_L.mat	E2_LT1D12.352F0001.xls	1	0.0999391	41.6431	0.729248	0.000202063	6.67768e-08
database_2016_10_19_Traj2_L.mat	E2_LT1D12.655F0001.xls	1	0.10806	33.6324	0.881814	0.00180728	2.44713e-08
database_2016_10_19_Traj2_L.mat	E2_LT1D13.057F0001.xls	1	0.0827565	44.8958	0.955165	0.00373308	4.76678e-08
database_2016_10_19_Traj2_L.mat	E2_LT1D13.459F0001.xls	1	0.056398	24.0169	0.916702	0.000124744	7.76805e-08
database_2016_10_19_Traj2_L.mat	E2_LT1D13.861F0001.xls	1	0.0656374	37.1055	0.839214	9.19781e-05	1.0261e-06
database_2016_10_19_Traj2_L.mat	E2_LT1D14.194F0001.xls	1	0.155132	32.9101	1.34438	0.000117694	1.91812e-06
database_2016_10_19_Traj2_L.mat	E2_LT1D14.595F0001.xls	1	0.727815	23.9057	0.876915	0.000512618	1.37961e-06
database_2016_10_19_Traj2_L.mat	E2_LT1D14.696F0001.xls	1	0.729861	29.2872	0.790602	0.000442128	4.38697e-06
database_2016_10_19_Traj2_L.mat	E2_LT1D14.797F0001.xls	1	0.0713778	40.4011	0.843032	9.07427e-05	2.38717e-06
database_2016_10_19_Traj2_L.mat	E2_LT1D14.898F0001.xls	1	0.0875339	26.6866	0.856668	0.000128039	4.23186e-06
database_2016_10_19_Traj2_L.mat	E2_LT1D14.999F0001.xls	1	0.0753364	39.5543	0.868776	9.91415e-05	1.71281e-07
database_2016_10_19_Traj2_L.mat	E2_LT1D6.325F0001.xls	1	0.125864	54.5232	0.952439	7.4541e-05	9.10588e-07
database_2016_10_19_Traj2_L.mat	E2_LT1D6.425F0001.xls	1	0.321274	46.198	0.710026	0.000146691	6.67627e-07
database_2016_10_19_Traj2_L.mat	E2_LT1D6.525F0001.xls	1	0.311061	72.678	0.961464	0.000301229	2.3835e-08
database_2016_10_19_Traj2_L.mat	E2_LT1D6.725F0001.xls	1	0.0448189	31.1844	0.897579	7.11651e-05	7.5608e-07
database_2016_10_19_Traj2_L.mat	E2_LT1D6.925F0001.xls	1	0.0691261	34.86	1.02861	7.91151e-05	1.40074e-06
database_2016_10_19_Traj2_L.mat	E2_LT1D7.125F0001.xls	1	0.801168	7.03108	0.960228	0.000814986	9.90614e-07
database_2016_10_19_Traj2_L.mat	E2_LT1D7.326F0001.xls	1	0.0719544	38.874	0.77624	6.3145e-05	1.18246e-06
database_2016_10_19_Traj2_L.mat	E2_LT1D7.527F0001.xls	1	0.722488	4.56739	1.09936	0.000259032	6.05738e-08
database_2016_10_19_Traj2_L.mat	E2_LT1D7.727F0001.xls	1	0.0226651	18.4772	1.06097	6.41032e-05	1.05582e-06
database_2016_10_19_Traj2_L.mat	E2_LT1D7.927F0001.xls	1	0.0719694	41.9681	0.844539	0.000156004	1.57147e-06
database_2016_10_19_Traj2_L.mat	E2_LT1D8.127F0001.xls	1	0.0695934	39.4982	0.798291	6.94322e-05	2.28615e-06
database_2016_10_19_Traj2_L.mat	E2_LT1D8.328F0001.xls	1	0.103372	47.5421	0.905478	4.78075e-05	1.46385e-06
database_2016_10_19_Traj2_L.mat	E2_LT1D8.529F0001.xls	1	0.0815795	42.8233	0.893973	6.29838e-05	1.10568e-07
database_2016_10_19_Traj2_L.mat	E2_LT1D8.729F0001.xls	1	0.0636271	35.0602	0.891346	4.76292e-05	1.72306e-06
database_2016_10_19_Traj2_L.mat	E2_LT1D8.929F0001.xls	1	0.081753	46.7603	0.844691	0.000167244	2.10454e-07
database_2016_10_19_Traj2_L.mat	E2_LT1D9.130F0001.xls	1	0.0757283	40.1571	0.835842	0.000227743	1.2111e-06
database_2016_10_19_Traj2_L.mat	E2_LT1D9.331F0001.xls	1	0.293474	5.30033	3.44812	0.000129597	1.32787e-05
database_2016_10_19_Traj2_L.mat	E2_LT1D9.531F0002.xls	1	0.0426902	30.2784	0.962799	0.000188145	9.28692e-07
database_2016_10_19_Traj2_L.mat	E2_LT1D9.580F0001.xls	1	0.13261	55.6773	0.900879	0.000106752	1.6241e-06
database_2016_10_19_Traj2_L.mat	E2_LT1D9.681F0001.xls	1	0.149889	17.9572	0.882589	0.0037445	9.10015e-07
database_2016_10_19_Traj2_L.mat	E2_LT1D9.982F0001.xls	1	0.105605	50.0611	0.878864	6.65113e-05	6.95723e-08
database_2016_10_19_Traj2_L.mat	E1_LT1D10.283F0001.xls	2	0.100938	75.5242	0.938234	0.000193592	5.30374e-08
database_2016_10_19_Traj2_L.mat	E1_LT1D10.577F0001.xls	2	0.0600189	51.8552	1.06495	0.000142099	1.16115e-06
database_2016_10_19_Traj2_L.mat	E1_LT1D10.879F0001.xls	2	0.0611509	38.8132	0.806458	6.25196e-05	1.47655e-06
database_2016_10_19_Traj2_L.mat	E1_LT1D11.179F0001.xls	2	0.185364	5.25487	2.66079	9.42183e-05	0.000334804
database_2016_10_19_Traj2_L.mat	E1_LT1D11.480F0001.xls	2	0.039923	15.5734	1.0876	0.000171349	1.08175e-05
database_2016_10_19_Traj2_L.mat	E1_LT1D11.750F0001.xls	2	0.0671579	33.3554	1.11085	6.70359e-05	4.24611e-06
database_2016_10_19_Traj2_L.mat	E1_LT1D12.050F0001.xls	2	0.0436195	16.3416	0.990901	9.21891e-05	1.08683e-06
database_2016_10_19_Traj2_L.mat	E1_LT1D12.352F0001.xls	2	0.0665348	51.3985	0.885899	0.000101266	6.527e-07
database_2016_10_19_Traj2_L.mat	E1_LT1D12.655F0001.xls	2	0.0735269	47.1122	0.936679	8.87349e-05	3.21886e-07
database_2016_10_19_Traj2_L.mat	E1_LT1D13.057F0001.xls	2	0.0551295	42.1159	0.923817	5.87483e-05	1.21293e-06
database_2016_10_19_Traj2_L.mat	E1_LT1D13.459F0001.xls	2	0.069276	47.9762	0.981182	6.03285e-05	1.3792e-06
database_2016_10_19_Traj2_L.mat	E1_LT1D13.861F0001.xls	2	0.0816574	25.6944	0.990868	0.000124255	9.64361e-07
database_2016_10_19_Traj2_L.mat	E1_LT1D14.194F0001.xls	2	0.130281	71.8056	0.800943	0.000186205	1.16097e-06
database_2016_10_19_Traj2_L.mat	E1_LT1D14.595F0001.xls	2	0.0758366	24.1027	1.00833	0.000134315	3.30942e-06
database_2016_10_19_Traj2_L.mat	E1_LT1D14.696F0001.xls	2	0.304835	6.95146	0.849002	0.000149644	6.83999e-06
database_2016_10_19_Traj2_L.mat	E1_LT1D14.797F0001.xls	2	0.0567374	21.712	0.945563	8.704e-05	2.1875e-06
database_2016_10_19_Traj2_L.mat	E1_LT1D14.898F0001.xls	2	0.509579	9.30031	1.62027	0.000223137	1.15154e-05
database_2016_10_19_Traj2_L.mat	E1_LT1D14.999F0001.xls	2	0.478232	9.55414	1.8624	0.000352835	1.33088e-06
database_2016_10_19_Traj2_L.mat	E1_LT1D6.925F0001.xls	2	0.123128	96.3188	0.855109	0.000138805	1.60711e-06
database_2016_10_19_Traj2_L.mat	E1_LT1D7.125F0001.xls	2	0.121001	80.4928	0.772715	0.000300262	1.20788e-07
database_2016_10_19_Traj2_L.mat	E1_LT1D7.326F0001.xls	2	0.0771691	63.4977	0.953517	0.000138008	1.6583e-06
database_2016_10_19_Traj2_L.mat	E1_LT1D7.527F0001.xls	2	0.0608368	47.8463	0.946508	9.46383e-05	7.94458e-08
database_2016_10_19_Traj2_L.mat	E1_LT1D7.727F0001.xls	2	0.0727999	31.8203	0.954907	4.24956e-05	1.22029e-06
database_2016_10_19_Traj2_L.mat	E1_LT1D7.927F0001.xls	2	0.0912638	35.9429	1.01792	6.77231e-05	3.64632e-06
database_2016_10_19_Traj2_L.mat	E1_LT1D8.127F0001.xls	2	0.1189	87.037	0.858717	0.000162073	1.22993e-06
database_2016_10_19_Traj2_L.mat	E1_LT1D8.328F0001.xls	2	0.0678754	37.8045	0.892724	5.93045e-05	3.26443e-06
database_2016_10_19_Traj2_L.mat	E1_LT1D8.529F0001.xls	2	0.0624003	18.9512	0.867076	8.73506e-05	1.13721e-06
database_2016_10_19_Traj2_L.mat	E1_LT1D8.729F0001.xls	2	0.066478	37.3136	0.980015	5.00855e-05	1.39896e-06
database_2016_10_19_Traj2_L.mat	E1_LT1D8.929F0001.xls	2	0.0628886	34.3463	0.801165	4.69687e-05	5.09537e-06
database_2016_10_19_Traj2_L.mat	E1_LT1D9.130F0001.xls	2	0.0725513	25.884	0.859287	7.4634e-05	2.43927e-06
database_2016_10_19_Traj2_L.mat	E1_LT1D9.331F0001.xls	2	0.0653702	44.2267	0.919357	7.39574e-05	4.12054e-06
database_2016_10_19_Traj2_L.mat	E1_LT1D9.531F0002.xls	2	0.0845052	29.317	0.822084	5.44664e-05	4.91986e-06
database_2016_10_19_Traj2_L.mat	E1_LT1D9.580F0001.xls	2	0.0689495	43.1041	0.823863	0.000123846	6.99074e-07
database_2016_10_19_Traj2_L.mat	E1_LT1D9.681F0001.xls	2	0.0600596	30.1327	0.835922	8.93251e-05	8.28093e-07
database_2016_10_19_Traj2_L.mat	E1_LT1D9.982F0001.xls	2	0.0653048	53.6919	0.845334	7.22329e-05	1.03374e-06
database_2016_10_19_Traj2_L.mat	E2_LT1D10.577F0001.xls	2	0.539374	2.92587	1.0805	0.000369764	7.2116e-06
database_2016_10_19_Traj2_L.mat	E2_LT1D10.879F0001.xls	2	0.0846076	58.3729	0.861999	7.0617e-05	9.91913e-07
database_2016_10_19_Traj2_L.mat	E2_LT1D11.179F0001.xls	2	0.0711668	35.6024	0.982	5.73697e-05	1.96705e-08
database_2016_10_19_Traj2_L.mat	E2_LT1D11.480F0001.xls	2	0.119714	35.2197	0.784225	5.07702e-05	2.69585e-06
database_2016_10_19_Traj2_L.mat	E2_LT1D11.750F0001.xls	2	0.0617532	38.8993	0.923933	5.34769e-05	1.3633e-06
database_2016_10_19_Traj2_L.mat	E2_LT1D12.050F0001.xls	2	0.0696228	36.6738	0.870204	0.000258239	1.37836e-07
database_2016_10_19_Traj2_L.mat	E2_LT1D12.352F0001.xls	2	0.612739	4.11588	0.686029	0.000202063	1.67952e-06
database_2016_10_19_Traj2_L.mat	E2_LT1D12.655F0001.xls	2	0.0471814	29.8955	0.92967	0.00180728	2.98299e-08
database_2016_10_19_Traj2_L.mat	E2_LT1D13.057F0001.xls	2	0.0498708	29.2179	1.05662	0.00373308	2.94586e-07
database_2016_10_19_Traj2_L.mat	E2_LT1D13.459F0001.xls	2	0.0201798	11.6446	0.819047	0.000124744	5.83732e-07
database_2016_10_19_Traj2_L.mat	E2_LT1D13.861F0001.xls	2	0.0874573	35.7239	0.84625	9.19781e-05	4.86436e-07
database_2016_10_19_Traj2_L.mat	E2_LT1D14.194F0001.xls	2	0.0756909	48.2681	0.862662	0.000117694	1.30758e-06
database_2016_10_19_Traj2_L.mat	E2_LT1D14.595F0001.xls	2	0.0929441	60.3803	0.844986	0.000512618	1.6887e-06
database_2016_10_19_Traj2_L.mat	E2_LT1D14.696F0001.xls	2	0.0781981	67.6806	0.89136	0.000442128	1.81324e-06
database_2016_10_19_Traj2_L.mat	E2_LT1D14.797F0001.xls	2	0.0652229	26.5285	0.906462	9.07427e-05	1.4485e-06
database_2016_10_19_Traj2_L.mat	E2_LT1D14.898F0001.xls	2	0.0664085	31.3383	0.926597	0.000128039	3.99808e-06
database_2016_10_19_Traj2_L.mat	E2_LT1D14.999F0001.xls	2	0.103851	34.381	0.924098	9.91415e-05	2.39778e-07
database_2016_10_19_Traj2_L.mat	E2_LT1D6.325F0001.xls	2	0.0730052	41.1953	0.870885	7.4541e-05	7.77363e-07
database_2016_10_19_Traj2_L.mat	E2_LT1D6.425F0001.xls	2	0.0920933	72.425	0.760575	0.000146691	4.22836e-07
database_2016_10_19_Traj2_L.mat	E2_LT1D6.525F0001.xls	2	0.550168	14.8048	2.06337	0.000301229	3.56065e-07
database_2016_10_19_Traj2_L.mat	E2_LT1D6.725F0001.xls	2	0.0915998	27.1682	1.04889	7.11651e-05	8.27572e-07
database_2016_10_19_Traj2_L.mat	E2_LT1D6.925F0001.xls	2	0.0838275	36.5314	0.960291	7.91151e-05	1.42259e-06
database_2016_10_19_Traj2_L.mat	E2_LT1D7.125F0001.xls	2	0.125501	74.4325	0.760091	0.000814986	6.52287e-07
database_2016_10_19_Traj2_L.mat	E2_LT1D7.326F0001.xls	2	0.0807081	40.5854	0.870248	6.3145e-05	1.27222e-06
database_2016_10_19_Traj2_L.mat	E2_LT1D7.527F0001.xls	2	0.12734	101.234	0.764019	0.000259032	6.02067e-08
database_2016_10_19_Traj2_L.mat	E2_LT1D7.727F0001.xls	2	0.0853028	31.6057	0.997426	6.41032e-05	1.46879e-06
database_2016_10_19_Traj2_L.mat	E2_LT1D7.927F0001.xls	2	0.928268	2.94513	2.01087	0.000156004	1.0776e-06
database_2016_10_19_Traj2_L.mat	E2_LT1D8.127F0001.xls	2	0.0829984	35.8634	0.83524	6.94322e-05	2.26783e-06
database_2016_10_19_Traj2_L.mat	E2_LT1D8.328F0001.xls	2	0.0872112	47.2971	0.854923	4.78075e-05	1.08652e-06
database_2016_10_19_Traj2_L.mat	E2_LT1D8.529F0001.xls	2	0.0839277	38.6146	0.858115	6.29838e-05	1.58498e-07
database_2016_10_19_Traj2_L.mat	E2_LT1D8.729F0001.xls	2	0.0925522	34.5732	0.871132	4.76292e-05	1.50831e-06
database_2016_10_19_Traj2_L.mat	E2_LT1D8.929F0001.xls	2	0.451633	7.17487	0.989956	0.000167244	4.82061e-06
database_2016_10_19_Traj2_L.mat	E2_LT1D9.130F0001.xls	2	0.798663	6.89086	1.7045	0.000227743	2.67006e-07
database_2016_10_19_Traj2_L.mat	E2_LT1D9.331F0001.xls	2	0.145603	93.7196	0.77676	0.000129597	2.46824e-07
database_2016_10_19_Traj2_L.mat	E2_LT1D9.531F0002.xls	2	0.0244284	12.2555	0.948916	0.000188145	1.39934e-06
database_2016_10_19_Traj2_L.mat	E2_LT1D9.580F0001.xls	2	0.0569119	48.8096	0.901151	0.000106752	1.42279e-06
database_2016_10_19_Traj2_L.mat	E2_LT1D9.681F0001.xls	2	0.0356398	18.8123	0.949104	0.0037445	1.18973e-06
database_2016_10_19_Traj2_L.mat	E2_LT1D9.982F0001.xls	2	0.0782356	54.7009	0.848943	6.65113e-05	1.17269e-07
database_2016_10_19_Traj2_L.mat	E1_LT1D11.179F0001.xls	3	0.0345809	35.8287	0.96193	9.42183e-05	3.31995e-06
database_2016_10_19_Traj2_L.mat	E1_LT1D11.480F0001.xls	3	0.18106	2.3959	1.00986	0.000171349	7.65765e-05
database_2016_10_19_Traj2_L.mat	E1_LT1D11.750F0001.xls	3	0.0298905	30.6576	0.948598	6.70359e-05	1.93934e-05
database_2016_10_19_Traj2_L.mat	E1_LT1D12.050F0001.xls	3	0.0429527	34.1041	0.911217	9.21891e-05	8.93542e-07
database_2016_10_19_Traj2_L.mat	E1_LT1D13.861F0001.xls	3	0.0246733	24.9038	0.972948	0.000124255	1.0087e-06
database_2016_10_19_Traj2_L.mat	E1_LT1D14.595F0001.xls	3	0.230849	7.62433	1.0236	0.000134315	1.08622e-05
database_2016_10_19_Traj2_L.mat	E1_LT1D14.696F0001.xls	3	0.043693	34.7573	0.967616	0.000149644	4.59485e-06
database_2016_10_19_Traj2_L.mat	E1_LT1D14.797F0001.xls	3	0.0569775	34.1537	0.955682	8.704e-05	2.47726e-06
database_2016_10_19_Traj2_L.mat	E1_LT1D14.898F0001.xls	3	0.0578479	35.2433	0.912508	0.000223137	4.91595e-06
database_2016_10_19_Traj2_L.mat	E1_LT1D14.999F0001.xls	3	0.0666128	45.7234	0.921144	0.000352835	1.63244e-07
database_2016_10_19_Traj2_L.mat	E1_LT1D7.527F0001.xls	3	0.383106	10.6325	0.919494	9.46383e-05	3.09507e-08
database_2016_10_19_Traj2_L.mat	E1_LT1D7.727F0001.xls	3	0.0478783	38.3787	0.841537	4.24956e-05	1.0861e-06
database_2016_10_19_Traj2_L.mat	E1_LT1D7.927F0001.xls	3	0.0450837	33.2533	0.882011	6.77231e-05	2.63391e-06
database_2016_10_19_Traj2_L.mat	E1_LT1D8.328F0001.xls	3	0.0265616	33.9021	0.966455	5.93045e-05	4.54867e-06
database_2016_10_19_Traj2_L.mat	E1_LT1D8.529F0001.xls	3	0.0496886	26.637	0.886458	8.73506e-05	5.36912e-07
database_2016_10_19_Traj2_L.mat	E1_LT1D8.729F0001.xls	3	0.0343275	28.7778	0.979335	5.00855e-05	2.8137e-06
database_2016_10_19_Traj2_L.mat	E1_LT1D8.929F0001.xls	3	0.0253192	26.741	0.837217	4.69687e-05	1.54554e-06
database_2016_10_19_Traj2_L.mat	E1_LT1D9.130F0001.xls	3	0.0605884	26.359	0.995469	7.4634e-05	2.33929e-06
database_2016_10_19_Traj2_L.mat	E1_LT1D9.531F0002.xls	3	0.0522849	30.9991	0.920293	5.44664e-05	4.42839e-06
database_2016_10_19_Traj2_L.mat	E1_LT1D9.681F0001.xls	3	0.0553363	31.415	0.970702	8.93251e-05	7.31695e-07
database_2016_10_19_Traj2_L.mat	E2_LT1D10.577F0001.xls	3	0.0470232	47.7893	1.10085	0.000369764	1.34142e-06
database_2016_10_19_Traj2_L.mat	E2_LT1D11.179F0001.xls	3	0.0616468	37.9918	0.876352	5.73697e-05	9.49703e-08
database_2016_10_19_Traj2_L.mat	E2_LT1D11.480F0001.xls	3	0.056315	29.4696	0.903845	5.07702e-05	4.95869e-06
database_2016_10_19_Traj2_L.mat	E2_LT1D12.050F0001.xls	3	0.114466	44.7183	0.859367	0.000258239	3.44876e-07
database_2016_10_19_Traj2_L.mat	E2_LT1D12.352F0001.xls	3	0.043082	35.5903	0.886144	0.000202063	2.47396e-07
database_2016_10_19_Traj2_L.mat	E2_LT1D12.655F0001.xls	3	0.0239269	25.8188	1.03025	0.00180728	3.05627e-07
database_2016_10_19_Traj2_L.mat	E2_LT1D13.057F0001.xls	3	0.00965638	2.13789	1.59685	0.00373308	5.54654e-06
database_2016_10_19_Traj2_L.mat	E2_LT1D13.459F0001.xls	3	0.67279	1.21298	1.14235	0.000124744
database_2016_10_19_Traj2_L.mat	E2_LT1D13.861F0001.xls	3	0.0515936	33.3555	0.955054	9.19781e-05	6.34288e-07
database_2016_10_19_Traj2_L.mat	E2_LT1D14.797F0001.xls	3	0.0384211	27.0152	0.976214	9.07427e-05	1.07281e-06
database_2016_10_19_Traj2_L.mat	E2_LT1D14.898F0001.xls	3	0.0489714	35.5005	0.805607	0.000128039	3.21805e-06
database_2016_10_19_Traj2_L.mat	E2_LT1D14.999F0001.xls	3	0.0365434	27.8784	0.937996	9.91415e-05	3.53374e-07
database_2016_10_19_Traj2_L.mat	E2_LT1D6.525F0001.xls	3	0.0614873	45.9097	0.895475	0.000301229	9.05904e-09
database_2016_10_19_Traj2_L.mat	E2_LT1D6.725F0001.xls	3	0.0566156	33.5468	0.933826	7.11651e-05	5.90503e-07
database_2016_10_19_Traj2_L.mat	E2_LT1D6.925F0001.xls	3	0.0481752	33.6662	0.812193	7.91151e-05	1.45855e-06
database_2016_10_19_Traj2_L.mat	E2_LT1D7.326F0001.xls	3	0.029436	32.2728	0.93622	6.3145e-05	8.95602e-07
database_2016_10_19_Traj2_L.mat	E2_LT1D7.727F0001.xls	3	0.0662427	29.1745	1.02095	6.41032e-05	1.31903e-06
database_2016_10_19_Traj2_L.mat	E2_LT1D7.927F0001.xls	3	0.0660772	35.587	0.834896	0.000156004	1.54042e-06
database_2016_10_19_Traj2_L.mat	E2_LT1D8.127F0001.xls	3	0.0498529	40.4675	0.831096	6.94322e-05	1.50991e-06
database_2016_10_19_Traj2_L.mat	E2_LT1D8.529F0001.xls	3	0.0438954	31.5651	0.909265	6.29838e-05	1.19663e-07
database_2016_10_19_Traj2_L.mat	E2_LT1D8.729F0001.xls	3	0.0473117	35.5471	0.867613	4.76292e-05	1.56932e-06
database_2016_10_19_Traj2_L.mat	E2_LT1D8.929F0001.xls	3	0.0604075	34.6373	0.934966	0.000167244	4.93223e-07
database_2016_10_19_Traj2_L.mat	E2_LT1D9.130F0001.xls	3	0.0791367	38.4937	0.9305	0.000227743	1.0933e-06
database_2016_10_19_Traj2_L.mat	E2_LT1D9.531F0002.xls	3	0.154471	1.92244	0.644202	0.000188145	7.56644e-06
database_2016_10_19_Traj2_L.mat	E2_LT1D9.681F0001.xls	3	0.0460302	27.3633	0.806664	0.0037445	9.8655e-07
database_2016_10_19_Traj2_L.mat	E1_LT1D11.480F0001.xls	4	0.0302319	26.8341	0.969136	0.000171349	7.16948e-06
database_2016_10_19_Traj2_L.mat	E1_LT1D14.595F0001.xls	4	0.0357303	15.2487	0.909935	0.000134315	2.6807e-06
database_2016_10_19_Traj2_L.mat	E1_LT1D8.529F0001.xls	4	0.0518869	24.7419	0.996682	8.73506e-05	4.88739e-07
database_2016_10_19_Traj2_L.mat	E1_LT1D9.130F0001.xls	4	0.0380716	19.7099	0.880125	7.4634e-05	4.55884e-06
database_2016_10_19_Traj2_L.mat	E2_LT1D13.459F0001.xls	4	0.0517158	22.804	0.938817	0.000124744	6.77597e-08
database_2016_10_19_Traj2_L.mat	E2_LT1D7.727F0001.xls	4	0.0707808	25.2846	0.966308	6.41032e-05	1.73358e-06
database_2016_10_19_Traj2_L.mat	E2_LT1D9.531F0002.xls	4	0.0686978	24.0305	0.878511	0.000188145	7.92073e-07
database_2016_10_19_Traj2_L.mat	E1_LT1D11.480F0001.xls	5	0.049221	32.3447	0.965998	0.000171349	5.90703e-06
database_2016_10_19_Traj2_L.mat	E1_LT1D14.595F0001.xls	5	0.0419745	23.6108	0.878708	0.000134315	2.3209e-06
database_2016_10_19_Traj2_L.mat	E2_LT1D13.459F0001.xls	5	0.0569972	30.3244	0.829952	0.000124744	2.51482e-08
database_2016_10_19_Traj2_L.mat	E2_LT1D9.531F0002.xls	5	0.00882644	10.3331	0.838004	0.000188145	6.19847e-07
database_2016_11_03_Traj1_L_updatedGPeBorder.mat	E1_LT1D10.219F0001.xls	1	0.0366758	44.8212	0.82528	6.50612e-05	3.01174e-07
database_2016_11_03_Traj1_L_updatedGPeBorder.mat	E1_LT1D10.420F0001.xls	1	0.0566265	64.5095	0.8017	0.000203624	1.15484e-06
database_2016_11_03_Traj1_L_updatedGPeBorder.mat	E1_LT1D10.692F0001.xls	1	0.0250503	33.1213	0.87806	0.000462458	1.36313e-06
database_2016_11_03_Traj1_L_updatedGPeBorder.mat	E1_LT1D11.198F0001.xls	1	0.111305	99.0743	0.808696	0.00374801	5.66841e-07
database_2016_11_03_Traj1_L_updatedGPeBorder.mat	E1_LT1D11.399F0001.xls	1	0.059964	30.5411	0.970234	0.000361453	8.55087e-07
database_2016_11_03_Traj1_L_updatedGPeBorder.mat	E1_LT1D11.801F0001.xls	1	0.0698272	73.448	0.858275	0.000276612	1.65538e-06
database_2016_11_03_Traj1_L_updatedGPeBorder.mat	E1_LT1D12.103F0001.xls	1	0.0475277	44.2169	0.852071	0.000106947	3.39272e-07
database_2016_11_03_Traj1_L_updatedGPeBorder.mat	E1_LT1D12.607F0001.xls	1	0.474498	9.5542	0.786024	0.000832125	1.51611e-06
database_2016_11_03_Traj1_L_updatedGPeBorder.mat	E1_LT1D13.008F0001.xls	1	0.0300206	34.1507	0.847467	9.29489e-05	2.69856e-07
database_2016_11_03_Traj1_L_updatedGPeBorder.mat	E1_LT1D13.389F0001.xls	1	0.024232	26.2219	0.967402	0.000120102	1.18236e-06
database_2016_11_03_Traj1_L_updatedGPeBorder.mat	E1_LT1D13.791F0001.xls	1	0.0506906	49.3144	0.980862	0.000113395	6.06882e-08
database_2016_11_03_Traj1_L_updatedGPeBorder.mat	E1_LT1D14.192F0001.xls	1	0.0355479	47.9397	0.894898	0.000210796	9.70769e-07
database_2016_11_03_Traj1_L_updatedGPeBorder.mat	E1_LT1D14.694F0001.xls	1	0.0623424	54.7936	0.893891	9.96787e-05	3.23588e-07
database_2016_11_03_Traj1_L_updatedGPeBorder.mat	E1_LT1D14.796F0001.xls	1	0.049398	34.726	0.903402	0.000159778	1.01952e-06
database_2016_11_03_Traj1_L_updatedGPeBorder.mat	E1_LT1D14.898F0002.xls	1	0.0425243	38.2199	0.91699	0.00013835	6.14353e-07
database_2016_11_03_Traj1_L_updatedGPeBorder.mat	E2_LT1D10.219F0001.xls	1	0.318801	20.0875	0.989912	0.000151874	2.83686e-06
database_2016_11_03_Traj1_L_updatedGPeBorder.mat	E2_LT1D10.420F0001.xls	1	0.500446	20.6278	1.34105	0.000742916	1.40542e-07
database_2016_11_03_Traj1_L_updatedGPeBorder.mat	E2_LT1D10.692F0001.xls	1	0.0142686	28.0264	4.59214	0.000192555	9.1866e-07
database_2016_11_03_Traj1_L_updatedGPeBorder.mat	E2_LT1D10.794F0001.xls	1	0.0348769	39.3906	0.950479	5.16109e-05	1.77041e-06
database_2016_11_03_Traj1_L_updatedGPeBorder.mat	E2_LT1D11.198F0001.xls	1	0.284378	40.0665	1.57981	0.000307669	2.77085e-06
database_2016_11_03_Traj1_L_updatedGPeBorder.mat	E2_LT1D11.399F0001.xls	1	0.0328863	30.5411	0.970234	7.09186e-05	1.91735e-06
database_2016_11_03_Traj1_L_updatedGPeBorder.mat	E2_LT1D11.801F0001.xls	1	0.291913	33.7043	2.4115	0.000288643	2.57997e-06
database_2016_11_03_Traj1_L_updatedGPeBorder.mat	E2_LT1D12.103F0001.xls	1	0.0486063	49.4829	0.848667	0.00058324	1.32859e-08
database_2016_11_03_Traj1_L_updatedGPeBorder.mat	E2_LT1D12.607F0001.xls	1	0.0622464	67.3603	0.877894	0.000133461	3.81694e-07
database_2016_11_03_Traj1_L_updatedGPeBorder.mat	E2_LT1D13.008F0001.xls	1	0.0423594	48.4297	1.00631	0.0018197	6.18032e-08
database_2016_11_03_Traj1_L_updatedGPeBorder.mat	E2_LT1D13.389F0001.xls	1	0.711467	6.3168	1.36809	0.000818963	9.25442e-06
database_2016_11_03_Traj1_L_updatedGPeBorder.mat	E2_LT1D13.791F0001.xls	1	0.0764584	71.0863	0.852692	0.000183243	1.22476e-07
database_2016_11_03_Traj1_L_updatedGPeBorder.mat	E2_LT1D14.192F0001.xls	1	0.685205	11.6985	0.835687	0.000450273	9.83328e-06
database_2016_11_03_Traj1_L_updatedGPeBorder.mat	E2_LT1D14.694F0001.xls	1	0.0593869	54.7936	0.893891	8.69834e-05	3.77034e-06
database_2016_11_03_Traj1_L_updatedGPeBorder.mat	E2_LT1D14.796F0001.xls	1	0.0597314	54.3537	0.872849	0.000143492	6.64222e-06
database_2016_11_03_Traj1_L_updatedGPeBorder.mat	E2_LT1D14.898F0002.xls	1	0.0461178	37.5717	0.908228	0.000326682	3.05234e-06
database_2016_11_03_Traj1_L_updatedGPeBorder.mat	E2_LT1D8.756F0001.xls	1	0.0353755	39.0764	1.03264	4.2377e-05	1.78816e-06
database_2016_11_03_Traj1_L_updatedGPeBorder.mat	E2_LT1D8.857F0001.xls	1	0.027671	34.3576	0.958694	5.44645e-05	5.53965e-06
database_2016_11_03_Traj1_L_updatedGPeBorder.mat	E2_LT1D9.063F0001.xls	1	0.0517442	43.3176	0.889309	5.76007e-05	1.61989e-06
database_2016_11_03_Traj1_L_updatedGPeBorder.mat	E2_LT1D9.511F0001.xls	1	0.0540982	52.1167	1.03652	6.13282e-05	1.33407e-06
database_2016_11_03_Traj1_L_updatedGPeBorder.mat	E2_LT1D9.815F0001.xls	1	0.0377176	43.8495	0.835719	4.93547e-05	1.96336e-06
database_2016_11_03_Traj1_L_updatedGPeBorder.mat	E1_LT1D10.219F0001.xls	2	0.02981	28.4113	0.974726	6.50612e-05	6.69686e-07
database_2016_11_03_Traj1_L_updatedGPeBorder.mat	E1_LT1D10.420F0001.xls	2	0.0484088	56.3558	0.954626	0.000203624	1.75903e-06
database_2016_11_03_Traj1_L_updatedGPeBorder.mat	E1_LT1D10.692F0001.xls	2	0.0264901	20.4008	0.977988	0.000462458	1.37374e-06
database_2016_11_03_Traj1_L_updatedGPeBorder.mat	E1_LT1D11.399F0001.xls	2	0.0589918	21.7453	0.987863	0.000361453	1.04635e-06
database_2016_11_03_Traj1_L_updatedGPeBorder.mat	E1_LT1D11.801F0001.xls	2	0.22219	13.9551	1.85236	0.000276612	1.39952e-06
database_2016_11_03_Traj1_L_updatedGPeBorder.mat	E1_LT1D12.103F0001.xls	2	0.0484854	47.4425	0.930621	0.000106947	4.22555e-07
database_2016_11_03_Traj1_L_updatedGPeBorder.mat	E1_LT1D12.607F0001.xls	2	0.0932556	112.935	0.833005	0.000832125	2.43307e-07
database_2016_11_03_Traj1_L_updatedGPeBorder.mat	E1_LT1D13.008F0001.xls	2	0.0255411	17.2683	1.01528	9.29489e-05	1.36496e-07
database_2016_11_03_Traj1_L_updatedGPeBorder.mat	E1_LT1D13.389F0001.xls	2	0.041527	29.0115	1.02566	0.000120102	1.22145e-06
database_2016_11_03_Traj1_L_updatedGPeBorder.mat	E1_LT1D13.791F0001.xls	2	0	0.0736036	1.0579	0.000113395	4.75914e-05
database_2016_11_03_Traj1_L_updatedGPeBorder.mat	E1_LT1D14.192F0001.xls	2	0.04052	39.7549	0.892954	0.000210796	9.17691e-07
database_2016_11_03_Traj1_L_updatedGPeBorder.mat	E1_LT1D14.694F0001.xls	2	0.0481762	37.5797	0.942419	9.96787e-05	2.57763e-07
database_2016_11_03_Traj1_L_updatedGPeBorder.mat	E1_LT1D14.796F0001.xls	2	0.523361	1.92922	0.70994	0.000159778	1.99986e-05
database_2016_11_03_Traj1_L_updatedGPeBorder.mat	E1_LT1D14.898F0002.xls	2	0.0354909	25.3538	0.937532	0.00013835	1.09706e-06
database_2016_11_03_Traj1_L_updatedGPeBorder.mat	E2_LT1D10.219F0001.xls	2	0.101694	137.183	0.742961	0.000151874	7.46707e-07
database_2016_11_03_Traj1_L_updatedGPeBorder.mat	E2_LT1D10.420F0001.xls	2	0.111002	125.206	0.793767	0.000742916	7.54735e-07
database_2016_11_03_Traj1_L_updatedGPeBorder.mat	E2_LT1D10.692F0001.xls	2	0.0803547	106.357	1.72993	0.000192555	1.00061e-06
database_2016_11_03_Traj1_L_updatedGPeBorder.mat	E2_LT1D10.794F0001.xls	2	0.0557334	46.2411	0.905028	5.16109e-05	1.86624e-06
database_2016_11_03_Traj1_L_updatedGPeBorder.mat	E2_LT1D11.198F0001.xls	2	0.104036	121.879	0.801461	0.000307669	2.25288e-06
database_2016_11_03_Traj1_L_updatedGPeBorder.mat	E2_LT1D11.399F0001.xls	2	0.0277453	21.7453	0.987863	7.09186e-05	3.90766e-06
database_2016_11_03_Traj1_L_updatedGPeBorder.mat	E2_LT1D11.801F0001.xls	2	0.109233	121.873	0.791473	0.000288643	1.22251e-06
database_2016_11_03_Traj1_L_updatedGPeBorder.mat	E2_LT1D12.103F0001.xls	2	0.0157731	16.1357	1.04323	0.00058324	6.56261e-08
database_2016_11_03_Traj1_L_updatedGPeBorder.mat	E2_LT1D12.607F0001.xls	2	0.0479101	19.5957	0.887182	0.000133461	4.52848e-07
database_2016_11_03_Traj1_L_updatedGPeBorder.mat	E2_LT1D13.008F0001.xls	2	0.019833	4.43778	0.78535	0.0018197	1.67726e-07
database_2016_11_03_Traj1_L_updatedGPeBorder.mat	E2_LT1D13.389F0001.xls	2	0.115186	101.255	0.749336	0.000818963	1.19195e-06
database_2016_11_03_Traj1_L_updatedGPeBorder.mat	E2_LT1D13.791F0001.xls	2	0.384197	0.735883	1.45009	0.000183243	2.45851e-07
database_2016_11_03_Traj1_L_updatedGPeBorder.mat	E2_LT1D14.192F0001.xls	2	0.103687	119.558	0.744182	0.000450273	1.37432e-06
database_2016_11_03_Traj1_L_updatedGPeBorder.mat	E2_LT1D14.694F0001.xls	2	0.055156	37.5797	0.942419	8.69834e-05	3.38372e-06
database_2016_11_03_Traj1_L_updatedGPeBorder.mat	E2_LT1D14.796F0001.xls	2	0.0521145	41.607	0.934419	0.000143492	4.58214e-06
database_2016_11_03_Traj1_L_updatedGPeBorder.mat	E2_LT1D14.898F0002.xls	2	0.0359149	24.8377	0.972951	0.000326682	5.78779e-06
database_2016_11_03_Traj1_L_updatedGPeBorder.mat	E2_LT1D8.756F0001.xls	2	0.0425907	38.3344	1.02018	4.2377e-05	1.77443e-06
database_2016_11_03_Traj1_L_updatedGPeBorder.mat	E2_LT1D8.857F0001.xls	2	0.028324	24.5068	0.822859	5.44645e-05	5.95273e-06
database_2016_11_03_Traj1_L_updatedGPeBorder.mat	E2_LT1D9.063F0001.xls	2	0.0602166	44.7696	0.882113	5.76007e-05	1.69992e-06
database_2016_11_03_Traj1_L_updatedGPeBorder.mat	E2_LT1D9.511F0001.xls	2	0.0612786	55.5584	0.910155	6.13282e-05	1.42134e-06
database_2016_11_03_Traj1_L_updatedGPeBorder.mat	E2_LT1D9.815F0001.xls	2	0.0448096	40.9262	0.959587	4.93547e-05	4.27667e-06
database_2016_11_03_Traj1_L_updatedGPeBorder.mat	E1_LT1D10.219F0001.xls	3	0.056746	45.8009	1.0397	6.50612e-05	6.63643e-07
database_2016_11_03_Traj1_L_updatedGPeBorder.mat	E1_LT1D10.420F0001.xls	3	0.0341067	37.4107	0.960012	0.000203624	3.62137e-06
database_2016_11_03_Traj1_L_updatedGPeBorder.mat	E1_LT1D10.692F0001.xls	3	0.0341648	33.8414	0.909008	0.000462458	1.0183e-06
database_2016_11_03_Traj1_L_updatedGPeBorder.mat	E1_LT1D11.399F0001.xls	3	0.0271377	20.035	0.839303	0.000361453	6.30966e-07
database_2016_11_03_Traj1_L_updatedGPeBorder.mat	E1_LT1D11.801F0001.xls	3	0.0298013	39.6619	0.905583	0.000276612	2.34405e-06
database_2016_11_03_Traj1_L_updatedGPeBorder.mat	E1_LT1D12.103F0001.xls	3	0.0290789	25.8044	0.914436	0.000106947	4.12226e-07
database_2016_11_03_Traj1_L_updatedGPeBorder.mat	E1_LT1D13.008F0001.xls	3	0.0348109	38.3954	1.0123	9.29489e-05	1.30641e-07
database_2016_11_03_Traj1_L_updatedGPeBorder.mat	E1_LT1D13.389F0001.xls	3	0.0713964	25.1061	0.775653	0.000120102	9.39696e-07
database_2016_11_03_Traj1_L_updatedGPeBorder.mat	E1_LT1D13.791F0001.xls	3	0.0403101	53.4362	0.912884	0.000113395	5.19989e-08
database_2016_11_03_Traj1_L_updatedGPeBorder.mat	E1_LT1D14.192F0001.xls	3	0.330024	1.63697	0.614253	0.000210796	7.38698e-06
database_2016_11_03_Traj1_L_updatedGPeBorder.mat	E1_LT1D14.694F0001.xls	3	0.0794511	63.2794	0.863802	9.96787e-05	2.78642e-07
database_2016_11_03_Traj1_L_updatedGPeBorder.mat	E1_LT1D14.796F0001.xls	3	0.0342939	38.1021	0.926255	0.000159778	8.32817e-07
database_2016_11_03_Traj1_L_updatedGPeBorder.mat	E1_LT1D14.898F0002.xls	3	0.618612	1.89207	0.486274	0.00013835	2.69867e-05
database_2016_11_03_Traj1_L_updatedGPeBorder.mat	E2_LT1D10.794F0001.xls	3	0.04209	47.2198	0.903897	5.16109e-05	1.72414e-06
database_2016_11_03_Traj1_L_updatedGPeBorder.mat	E2_LT1D11.399F0001.xls	3	0.0329679	20.035	0.839303	7.09186e-05	3.02198e-06
database_2016_11_03_Traj1_L_updatedGPeBorder.mat	E2_LT1D12.103F0001.xls	3	0.0337856	51.6344	0.933027	0.00058324	4.20777e-09
database_2016_11_03_Traj1_L_updatedGPeBorder.mat	E2_LT1D12.607F0001.xls	3	0.0580684	49.7242	0.974299	0.000133461	5.22332e-07
database_2016_11_03_Traj1_L_updatedGPeBorder.mat	E2_LT1D13.008F0001.xls	3	0.0516216	45.0531	0.930594	0.0018197	3.84328e-09
database_2016_11_03_Traj1_L_updatedGPeBorder.mat	E2_LT1D13.791F0001.xls	3	0.054847	66.3767	0.862257	0.000183243	9.19883e-08
database_2016_11_03_Traj1_L_updatedGPeBorder.mat	E2_LT1D14.694F0001.xls	3	0.0522094	63.2794	0.863802	8.69834e-05	2.24612e-06
database_2016_11_03_Traj1_L_updatedGPeBorder.mat	E2_LT1D14.796F0001.xls	3	0.0398593	46.8981	0.855147	0.000143492	1.25078e-05
database_2016_11_03_Traj1_L_updatedGPeBorder.mat	E2_LT1D14.898F0002.xls	3	0.0749504	6.05182	1.21604	0.000326682	2.00514e-05
database_2016_11_03_Traj1_L_updatedGPeBorder.mat	E2_LT1D8.756F0001.xls	3	0.0327503	31.9041	0.995679	4.2377e-05	1.9907e-06
database_2016_11_03_Traj1_L_updatedGPeBorder.mat	E2_LT1D8.857F0001.xls	3	0.0437	40.6044	0.922151	5.44645e-05	6.36249e-06
database_2016_11_03_Traj1_L_updatedGPeBorder.mat	E2_LT1D9.063F0001.xls	3	0.0471596	48.1575	0.89393	5.76007e-05	1.73133e-06
database_2016_11_03_Traj1_L_updatedGPeBorder.mat	E2_LT1D9.511F0001.xls	3	0.0445456	48.4292	0.925744	6.13282e-05	1.43445e-06
database_2016_11_03_Traj1_L_updatedGPeBorder.mat	E2_LT1D9.815F0001.xls	3	0.041704	30.451	0.993671	4.93547e-05	3.43976e-06
database_2016_11_03_Traj1_L_updatedGPeBorder.mat	E1_LT1D10.219F0001.xls	4	0.0291989	34.0445	0.915031	6.50612e-05	2.35707e-07
database_2016_11_03_Traj1_L_updatedGPeBorder.mat	E1_LT1D10.692F0001.xls	4	0.0364819	20.6408	0.783143	0.000462458	1.60868e-06
database_2016_11_03_Traj1_L_updatedGPeBorder.mat	E1_LT1D11.399F0001.xls	4	0.0166873	20.035	0.985697	0.000361453	4.96249e-07
database_2016_11_03_Traj1_L_updatedGPeBorder.mat	E1_LT1D13.008F0001.xls	4	0.0151648	21.706	0.853263	9.29489e-05	2.04302e-07
database_2016_11_03_Traj1_L_updatedGPeBorder.mat	E1_LT1D13.389F0001.xls	4	0.0196245	27.7097	1.01422	0.000120102	1.62483e-06
database_2016_11_03_Traj1_L_updatedGPeBorder.mat	E1_LT1D14.192F0001.xls	4	0.0439332	41.6257	0.942113	0.000210796	9.01107e-07
database_2016_11_03_Traj1_L_updatedGPeBorder.mat	E1_LT1D14.796F0001.xls	4	0.0375473	47.5071	0.901222	0.000159778	1.266e-06
database_2016_11_03_Traj1_L_updatedGPeBorder.mat	E1_LT1D14.898F0002.xls	4	0.0183869	23.4617	0.942314	0.00013835	1.09537e-06
database_2016_11_03_Traj1_L_updatedGPeBorder.mat	E2_LT1D10.794F0001.xls	4	0.0295762	33.7633	0.992297	5.16109e-05	1.83893e-06
database_2016_11_03_Traj1_L_updatedGPeBorder.mat	E2_LT1D11.399F0001.xls	4	0.0235443	20.035	0.985697	7.09186e-05	5.38442e-06
database_2016_11_03_Traj1_L_updatedGPeBorder.mat	E2_LT1D12.103F0001.xls	4	0.0368128	40.0704	0.935134	0.00058324	4.14958e-08
database_2016_11_03_Traj1_L_updatedGPeBorder.mat	E2_LT1D13.008F0001.xls	4	0	0.868261	2.09807	0.0018197	2.90116e-06
database_2016_11_03_Traj1_L_updatedGPeBorder.mat	E2_LT1D14.898F0002.xls	4	0.0367576	34.924	0.922223	0.000326682	3.78892e-06
database_2016_11_03_Traj1_L_updatedGPeBorder.mat	E2_LT1D8.756F0001.xls	4	0.0254599	31.4095	0.876764	4.2377e-05	1.67816e-06
database_2016_11_03_Traj1_L_updatedGPeBorder.mat	E2_LT1D8.857F0001.xls	4	0.032194	36.0394	0.810028	5.44645e-05	4.77358e-06
database_2016_11_03_Traj1_L_updatedGPeBorder.mat	E2_LT1D9.815F0001.xls	4	0.0289012	31.1818	0.936134	4.93547e-05	3.54222e-06
database_2016_11_03_Traj1_L_updatedGPeBorder.mat	E1_LT1D11.399F0001.xls	5	0.0514355	23.2113	0.81075	0.000361453	7.98099e-07
database_2016_11_03_Traj1_L_updatedGPeBorder.mat	E1_LT1D14.192F0001.xls	5	0.0125596	13.7973	0.944126	0.000210796	1.40041e-06
database_2016_11_03_Traj1_L_updatedGPeBorder.mat	E1_LT1D14.898F0002.xls	5	0.0323196	42.887	0.855954	0.00013835	4.72297e-07
database_2016_11_03_Traj1_L_updatedGPeBorder.mat	E2_LT1D11.399F0001.xls	5	0.0170413	23.2113	0.81075	7.09186e-05	4.2025e-06
database_2016_11_03_Traj1_L_updatedGPeBorder.mat	E2_LT1D14.898F0002.xls	5	0.0200811	5.04318	1.02387	0.000326682	2.54233e-05
database_2016_11_03_Traj2_R.mat	E1_RT1D10.002F0001.xls	1	0.0714871	54.5599	0.890898	0.000519378	3.75811e-06
database_2016_11_03_Traj2_R.mat	E1_RT1D10.375F0001.xls	1	0.0473542	47.6193	0.960751	6.16537e-05	5.79667e-07
database_2016_11_03_Traj2_R.mat	E1_RT1D11.170F0001.xls	1	0.0781382	54.4053	0.936522	0.000279611	5.76843e-07
database_2016_11_03_Traj2_R.mat	E1_RT1D11.371F0001.xls	1	0.0332602	40.7884	0.883012	0.000220287	1.60082e-06
database_2016_11_03_Traj2_R.mat	E1_RT1D11.572F0001.xls	1	0.558286	8.4936	1.9753	0.00029331	1.87452e-06
database_2016_11_03_Traj2_R.mat	E1_RT1D11.772F0001.xls	1	0.0482648	55.7346	0.943371	0.000109365	1.36192e-07
database_2016_11_03_Traj2_R.mat	E1_RT1D12.588F0001.xls	1	0.329175	21.3054	2.07211	0.000207529	5.1577e-06
database_2016_11_03_Traj2_R.mat	E1_RT1D13.193F0001.xls	1	0.0554065	49.6502	0.902183	0.000153398	4.95594e-07
database_2016_11_03_Traj2_R.mat	E1_RT1D13.395F0001.xls	1	0.660651	22.2758	1.36216	0.000741316	2.81027e-06
database_2016_11_03_Traj2_R.mat	E1_RT1D13.595F0001.xls	1	0.0638391	54.064	0.868758	0.000138663	1.82187e-06
database_2016_11_03_Traj2_R.mat	E1_RT1D13.998F0001.xls	1	0.8468	17.0794	2.9784	0.00069936	2.52062e-06
database_2016_11_03_Traj2_R.mat	E1_RT1D14.199F0001.xls	1	0.236781	15.6181	2.3025	0.000156152	2.15704e-07
database_2016_11_03_Traj2_R.mat	E1_RT1D14.703F0001.xls	1	0.189857	34.4845	0.844802	0.000257858	3.31469e-08
database_2016_11_03_Traj2_R.mat	E1_RT1D14.906F0001.xls	1	0.551852	32.4596	0.742314	0.00023089	2.37292e-07
database_2016_11_03_Traj2_R.mat	E1_RT1D8.827F0001.xls	1	0.628266	9.4901	1.21121	0.000451299	6.12563e-06
database_2016_11_03_Traj2_R.mat	E1_RT1D8.928F0001.xls	1	0.0793896	74.259	0.773523	0.000216019	8.37568e-07
database_2016_11_03_Traj2_R.mat	E1_RT1D9.028F0001.xls	1	0.0518182	65.9227	0.839724	6.60499e-05	1.40512e-06
database_2016_11_03_Traj2_R.mat	E1_RT1D9.229F0001.xls	1	0.0661456	36.7796	1.02703	6.56602e-05	4.4704e-06
database_2016_11_03_Traj2_R.mat	E1_RT1D9.429F0001.xls	1	0.0898292	85.1469	0.799897	0.000296532	1.53417e-06
database_2016_11_03_Traj2_R.mat	E1_RT1D9.630F0001.xls	1	0.39825	10.5646	2.17786	0.000413339	6.10684e-07
database_2016_11_03_Traj2_R.mat	E1_RT1D9.831F0001.xls	1	0.0625121	44.5173	0.898643	0.000150558	8.42231e-07
database_2016_11_03_Traj2_R.mat	E2_RT1D10.002F0001.xls	1	0.063288	43.9268	0.928632	7.66231e-05	5.22996e-07
database_2016_11_03_Traj2_R.mat	E2_RT1D10.375F0001.xls	1	0.052122	48.154	0.898686	6.02029e-05	9.26524e-07
database_2016_11_03_Traj2_R.mat	E2_RT1D11.170F0001.xls	1	0.142291	120.344	0.830937	0.00604522	1.97539e-07
database_2016_11_03_Traj2_R.mat	E2_RT1D11.371F0001.xls	1	0.0426204	53.5354	0.845318	0.000107685	3.59744e-07
database_2016_11_03_Traj2_R.mat	E2_RT1D11.572F0001.xls	1	0.0617042	66.8338	0.878579	0.000206475	5.34716e-09
database_2016_11_03_Traj2_R.mat	E2_RT1D11.772F0001.xls	1	0.0438565	36.9806	0.88706	0.00540437	2.49741e-08
database_2016_11_03_Traj2_R.mat	E2_RT1D12.588F0001.xls	1	0.0234714	32.4885	0.964345	7.38563e-05	8.60139e-07
database_2016_11_03_Traj2_R.mat	E2_RT1D13.193F0001.xls	1	0.0545942	38.5324	0.897432	0.000143632	1.18321e-07
database_2016_11_03_Traj2_R.mat	E2_RT1D13.395F0001.xls	1	0.440728	22.0217	1.59812	0.000449581	2.70109e-06
database_2016_11_03_Traj2_R.mat	E2_RT1D13.595F0001.xls	1	0.0342167	46.3196	0.981041	6.71387e-05	1.25595e-06
database_2016_11_03_Traj2_R.mat	E2_RT1D13.998F0001.xls	1	0.0545137	58.6792	0.942464	0.000122738	1.3585e-06
database_2016_11_03_Traj2_R.mat	E2_RT1D14.199F0001.xls	1	0.0575664	65.8331	0.864876	0.000178547	3.84139e-08
database_2016_11_03_Traj2_R.mat	E2_RT1D14.703F0001.xls	1	0.0632415	57.9579	0.919156	0.000259904	1.951e-08
database_2016_11_03_Traj2_R.mat	E2_RT1D14.906F0001.xls	1	0.069345	44.0325	0.78975	0.000191489	8.46982e-08
database_2016_11_03_Traj2_R.mat	E2_RT1D9.831F0001.xls	1	0.676981	6.2014	1.78248	0.000219721	9.4272e-07
database_2016_11_03_Traj2_R.mat	E1_RT1D10.002F0001.xls	2	0.0590103	58.9799	0.851945	0.000519378	1.85309e-06
database_2016_11_03_Traj2_R.mat	E1_RT1D10.375F0001.xls	2	0.0391991	38.1681	0.918453	6.16537e-05	7.96535e-07
database_2016_11_03_Traj2_R.mat	E1_RT1D11.170F0001.xls	2	0.376635	4.15596	1.35198	0.000279611	1.05467e-05
database_2016_11_03_Traj2_R.mat	E1_RT1D11.371F0001.xls	2	0.0432555	22.9011	1.01818	0.000220287	2.10345e-06
database_2016_11_03_Traj2_R.mat	E1_RT1D11.572F0001.xls	2	0.131089	123.134	0.762501	0.00029331	6.70727e-08
database_2016_11_03_Traj2_R.mat	E1_RT1D11.772F0001.xls	2	0.061557	64.2714	0.868516	0.000109365	1.20981e-07
database_2016_11_03_Traj2_R.mat	E1_RT1D12.588F0001.xls	2	0.0819391	101.61	0.8774	0.000207529	4.53374e-07
database_2016_11_03_Traj2_R.mat	E1_RT1D13.193F0001.xls	2	0.0592604	37.7821	0.889308	0.000153398	6.9203e-07
database_2016_11_03_Traj2_R.mat	E1_RT1D13.395F0001.xls	2	0.130699	128.759	0.778533	0.000741316	1.57817e-06
database_2016_11_03_Traj2_R.mat	E1_RT1D13.595F0001.xls	2	0.06286	66.4487	0.806407	0.000138663	1.42046e-06
database_2016_11_03_Traj2_R.mat	E1_RT1D13.998F0001.xls	2	0.0935487	105.844	0.799505	0.00069936	1.04486e-06
database_2016_11_03_Traj2_R.mat	E1_RT1D14.199F0001.xls	2	0.0538622	56.7861	0.916748	0.000156152	3.0058e-08
database_2016_11_03_Traj2_R.mat	E1_RT1D14.703F0001.xls	2	0.0972617	98.3617	0.82388	0.000257858	1.01506e-08
database_2016_11_03_Traj2_R.mat	E1_RT1D14.906F0001.xls	2	0.0915109	91.723	0.810272	0.00023089	8.0509e-08
database_2016_11_03_Traj2_R.mat	E1_RT1D8.827F0001.xls	2	0.138259	151.355	0.65813	0.000451299	7.25829e-07
database_2016_11_03_Traj2_R.mat	E1_RT1D8.928F0001.xls	2	0.197824	23.3733	1.03486	0.000216019	9.61226e-07
database_2016_11_03_Traj2_R.mat	E1_RT1D9.028F0001.xls	2	0.0841776	54.3742	0.972491	6.60499e-05	1.49689e-06
database_2016_11_03_Traj2_R.mat	E1_RT1D9.229F0001.xls	2	0.0487992	42.9491	0.873125	6.56602e-05	5.49235e-06
database_2016_11_03_Traj2_R.mat	E1_RT1D9.429F0001.xls	2	0.0967194	100.717	0.792256	0.000296532	1.50454e-06
database_2016_11_03_Traj2_R.mat	E1_RT1D9.630F0001.xls	2	0.116171	102.672	0.775948	0.000413339	1.7642e-07
database_2016_11_03_Traj2_R.mat	E1_RT1D9.831F0001.xls	2	0.159492	14.9607	0.972743	0.000150558	2.03386e-06
database_2016_11_03_Traj2_R.mat	E2_RT1D10.002F0001.xls	2	0.023087	36.8819	0.92466	7.66231e-05	5.52296e-07
database_2016_11_03_Traj2_R.mat	E2_RT1D10.375F0001.xls	2	0.0556357	55.7859	0.892805	6.02029e-05	7.14687e-07
database_2016_11_03_Traj2_R.mat	E2_RT1D11.371F0001.xls	2	0.0594264	43.6665	0.920682	0.000107685	4.78049e-07
database_2016_11_03_Traj2_R.mat	E2_RT1D11.572F0001.xls	2	0.0617763	51.4653	0.95651	0.000206475	3.79262e-08
database_2016_11_03_Traj2_R.mat	E2_RT1D11.772F0001.xls	2	0.0683857	36.5883	0.99947	0.00540437	1.41041e-08
database_2016_11_03_Traj2_R.mat	E2_RT1D12.588F0001.xls	2	0.0237758	33.8909	0.868668	7.38563e-05	1.07717e-06
database_2016_11_03_Traj2_R.mat	E2_RT1D13.193F0001.xls	2	0.0391859	44.1926	0.972367	0.000143632	1.21358e-07
database_2016_11_03_Traj2_R.mat	E2_RT1D13.395F0001.xls	2	0.10727	117.204	0.80613	0.000449581	1.06585e-06
database_2016_11_03_Traj2_R.mat	E2_RT1D13.595F0001.xls	2	0.0604928	53.9599	0.930774	6.71387e-05	1.1475e-06
database_2016_11_03_Traj2_R.mat	E2_RT1D13.998F0001.xls	2	0.0766305	35.8328	0.977182	0.000122738	1.69446e-06
database_2016_11_03_Traj2_R.mat	E2_RT1D14.199F0001.xls	2	0.0589157	48.5884	0.913295	0.000178547	4.09491e-08
database_2016_11_03_Traj2_R.mat	E2_RT1D14.703F0001.xls	2	0.435422	3.51821	1.53981	0.000259904	6.40387e-07
database_2016_11_03_Traj2_R.mat	E2_RT1D14.906F0001.xls	2	0.0120476	8.11772	0.784701	0.000191489	1.13668e-06
database_2016_11_03_Traj2_R.mat	E2_RT1D9.831F0001.xls	2	0.129771	171.937	0.629824	0.000219721	6.78104e-08
database_2016_11_03_Traj2_R.mat	E1_RT1D10.002F0001.xls	3	0.465036	1.38126	0.518197	0.000519378	8.11974e-05
database_2016_11_03_Traj2_R.mat	E1_RT1D10.375F0001.xls	3	0.0286039	40.3491	0.904191	6.16537e-05	4.32517e-07
database_2016_11_03_Traj2_R.mat	E1_RT1D11.170F0001.xls	3	0.0457011	46.3452	0.895099	0.000279611	7.33744e-07
database_2016_11_03_Traj2_R.mat	E1_RT1D11.371F0001.xls	3	0.108833	9.48568	2.42481	0.000220287	1.22827e-05
database_2016_11_03_Traj2_R.mat	E1_RT1D11.772F0001.xls	3	0.0441243	36.306	0.920793	0.000109365	1.88414e-07
database_2016_11_03_Traj2_R.mat	E1_RT1D13.193F0001.xls	3	0.16065	2.72205	0.932556	0.000153398	1.60361e-05
database_2016_11_03_Traj2_R.mat	E1_RT1D13.595F0001.xls	3	0.15616	11.6702	1.37591	0.000138663	3.80978e-06
database_2016_11_03_Traj2_R.mat	E1_RT1D14.199F0001.xls	3	0.0540209	47.6124	0.901831	0.000156152	2.49398e-08
database_2016_11_03_Traj2_R.mat	E1_RT1D8.928F0001.xls	3	0.0570382	49.6683	0.994756	0.000216019	1.50889e-06
database_2016_11_03_Traj2_R.mat	E1_RT1D9.028F0001.xls	3	0.0491458	62.3137	0.75526	6.60499e-05	1.37772e-06
database_2016_11_03_Traj2_R.mat	E1_RT1D9.229F0001.xls	3	0.033561	42.4745	0.914391	6.56602e-05	4.37291e-06
database_2016_11_03_Traj2_R.mat	E1_RT1D9.831F0001.xls	3	0.0379191	39.8953	0.946601	0.000150558	6.62322e-07
database_2016_11_03_Traj2_R.mat	E2_RT1D10.002F0001.xls	3	0.0338187	39.3684	0.962049	7.66231e-05	4.08566e-07
database_2016_11_03_Traj2_R.mat	E2_RT1D10.375F0001.xls	3	0.0331505	46.3368	0.885255	6.02029e-05	5.09016e-07
database_2016_11_03_Traj2_R.mat	E2_RT1D11.371F0001.xls	3	0.036407	53.5354	0.883292	0.000107685	5.47378e-07
database_2016_11_03_Traj2_R.mat	E2_RT1D11.572F0001.xls	3	0.0442093	58.6752	0.996489	0.000206475	1.73766e-08
database_2016_11_03_Traj2_R.mat	E2_RT1D11.772F0001.xls	3	0.0402943	35.1169	0.970413	0.00540437	2.82742e-08
database_2016_11_03_Traj2_R.mat	E2_RT1D12.588F0001.xls	3	0.0261762	24.0742	1.015	7.38563e-05	1.11889e-06
database_2016_11_03_Traj2_R.mat	E2_RT1D13.193F0001.xls	3	0.331663	5.98668	1.38461	0.000143632	1.69821e-06
database_2016_11_03_Traj2_R.mat	E2_RT1D13.595F0001.xls	3	0.0534634	41.5444	1.06886	6.71387e-05	1.20919e-06
database_2016_11_03_Traj2_R.mat	E2_RT1D13.998F0001.xls	3	0.0719972	53.3884	0.883505	0.000122738	1.47176e-06
database_2016_11_03_Traj2_R.mat	E2_RT1D14.199F0001.xls	3	0.043533	59.8069	0.87746	0.000178547	3.56547e-08
database_2016_11_03_Traj2_R.mat	E2_RT1D14.703F0001.xls	3	0.0579229	65.0869	0.895025	0.000259904	7.28278e-08
database_2016_11_03_Traj2_R.mat	E2_RT1D14.906F0001.xls	3	0.460897	7.37974	1.00151	0.000191489	1.63581e-06
database_2016_11_03_Traj2_R.mat	E1_RT1D10.002F0001.xls	4	0.0489425	59.3943	0.878993	0.000519378	2.61258e-06
database_2016_11_03_Traj2_R.mat	E1_RT1D11.371F0001.xls	4	0.0545197	36.9942	0.932264	0.000220287	1.63449e-06
database_2016_11_03_Traj2_R.mat	E1_RT1D11.772F0001.xls	4	0.264624	2.45311	4.60813	0.000109365	9.48458e-06
database_2016_11_03_Traj2_R.mat	E1_RT1D13.193F0001.xls	4	0.0236967	27.656	1.01347	0.000153398	1.42812e-06
database_2016_11_03_Traj2_R.mat	E1_RT1D13.595F0001.xls	4	0.0258925	35.9633	0.992898	0.000138663	3.01652e-06
database_2016_11_03_Traj2_R.mat	E1_RT1D14.199F0001.xls	4	0.691371	2.76728	5.81132	0.000156152	1.95185e-07
database_2016_11_03_Traj2_R.mat	E1_RT1D9.831F0001.xls	4	0.0262819	26.2725	1.11094	0.000150558	1.96142e-06
database_2016_11_03_Traj2_R.mat	E2_RT1D10.002F0001.xls	4	0.0315519	27.2125	1.0196	7.66231e-05	6.83987e-07
database_2016_11_03_Traj2_R.mat	E2_RT1D12.588F0001.xls	4	0.0557269	40.9028	0.854317	7.38563e-05	1.14796e-06
database_2016_11_03_Traj2_R.mat	E2_RT1D13.193F0001.xls	4	0.0507557	53.8801	0.897226	0.000143632	1.11979e-07
database_2016_11_03_Traj2_R.mat	E2_RT1D13.998F0001.xls	4	0.0272325	33.4279	1.02561	0.000122738	1.35982e-06
database_2016_11_03_Traj2_R.mat	E2_RT1D14.199F0001.xls	4	0.474591	0.606407	1.31391	0.000178547	1.69517e-06
database_2016_11_03_Traj2_R.mat	E2_RT1D14.703F0001.xls	4	0.0381145	43.4684	0.948113	0.000259904	1.87099e-08
database_2016_11_03_Traj2_R.mat	E2_RT1D14.906F0001.xls	4	0.0695455	46.4924	0.911512	0.000191489	1.5314e-07
database_2016_11_03_Traj2_R.mat	E1_RT1D11.371F0001.xls	5	0.00855396	12.7379	0.952693	0.000220287	8.40322e-06
database_2016_11_03_Traj2_R.mat	E1_RT1D11.772F0001.xls	5	0.00929443	2.74748	1.04875	0.000109365
database_2016_11_03_Traj2_R.mat	E1_RT1D13.193F0001.xls	5	0.0494054	47.9081	0.942608	0.000153398	4.05917e-07
database_2016_11_03_Traj2_R.mat	E2_RT1D10.002F0001.xls	5	0.0799471	13.6753	0.900534	7.66231e-05	7.30535e-07
database_2016_11_03_Traj2_R.mat	E2_RT1D13.193F0001.xls	5	0.0224526	31.0219	0.95752	0.000143632	2.95329e-07
database_2016_11_03_Traj2_R.mat	E2_RT1D14.906F0001.xls	5	0.0508155	50.6742	0.898787	0.000191489	1.2389e-07
database_2017_02_08_Traj1_R.mat	E1_LT1D10.026F0001.xls	1	0.379541	35.177	1.10785	0.00039219	1.34234e-06
database_2017_02_08_Traj1_R.mat	E1_LT1D10.276F0001.xls	1	0.494454	45.5209	0.928999	0.000829917	2.24065e-09
database_2017_02_08_Traj1_R.mat	E1_LT1D10.505F0001.xls	1	0.375688	35.7949	1.54066	0.000867296	3.56188e-07
database_2017_02_08_Traj1_R.mat	E1_LT1D10.790F0001.xls	1	0.0339124	40.8729	0.926139	0.00033482	9.26179e-08
database_2017_02_08_Traj1_R.mat	E1_LT1D11.041F0001.xls	1	0.11095	66.8895	1.06659	0.000738007	1.49177e-07
database_2017_02_08_Traj1_R.mat	E1_LT1D11.298F0001.xls	1	0.058252	42.3982	0.848454	0.000218891	3.45975e-07
database_2017_02_08_Traj1_R.mat	E1_LT1D11.598F0001.xls	1	0.0487098	56.5968	0.891014	6.45753e-05	5.98589e-07
database_2017_02_08_Traj1_R.mat	E1_LT1D11.860F0001.xls	1	0.0333902	30.7148	0.973774	6.28678e-05	2.19079e-07
database_2017_02_08_Traj1_R.mat	E1_LT1D12.285F0001.xls	1	0.0606895	46.0945	0.874772	0.000108676	1.51553e-07
database_2017_02_08_Traj1_R.mat	E1_LT1D12.548F0001.xls	1	0.0736786	86.0842	0.87438	0.00021493	4.05099e-09
database_2017_02_08_Traj1_R.mat	E1_LT1D12.838F0001.xls	1	0.506468	15.9187	2.83888	0.00102086	8.47198e-08
database_2017_02_08_Traj1_R.mat	E1_LT1D13.138F0001.xls	1	0.511065	20.043	1.24351	0.000505825	3.62919e-07
database_2017_02_08_Traj1_R.mat	E1_LT1D13.310F0001.xls	1	0.0531454	48.715	0.898989	0.000105279	3.81806e-07
database_2017_02_08_Traj1_R.mat	E1_LT1D13.493F0001.xls	1	0.0707737	67.5253	0.833812	0.000575124	4.32313e-08
database_2017_02_08_Traj1_R.mat	E1_LT1D13.756F0001.xls	1	0.0298761	38.1866	0.93787	6.41896e-05	5.03887e-07
database_2017_02_08_Traj1_R.mat	E1_LT1D13.843F0001.xls	1	0.0376496	50.5043	0.939576	5.04615e-05	1.79551e-08
database_2017_02_08_Traj1_R.mat	E1_LT1D13.951F0001.xls	1	0.0443054	40.4502	0.966912	5.10958e-05	7.43759e-07
database_2017_02_08_Traj1_R.mat	E1_LT1D14.073F0001.xls	1	0.0679417	64.3372	0.777369	0.000188766	1.95109e-07
database_2017_02_08_Traj1_R.mat	E1_LT1D14.189F0001.xls	1	0.601088	49.8339	0.878312	0.000573638	8.72837e-08
database_2017_02_08_Traj1_R.mat	E1_LT1D14.320F0001.xls	1	0.414626	48.4249	1.10524	0.000733076	4.70329e-08
database_2017_02_08_Traj1_R.mat	E1_LT1D14.519F0001.xls	1	0.105307	54.7568	1.0319	0.00107956	2.06927e-07
database_2017_02_08_Traj1_R.mat	E1_LT1D14.676F0001.xls	1	0.0843063	116.626	0.695913	0.00194687	1.14512e-08
database_2017_02_08_Traj1_R.mat	E1_LT1D14.747F0001.xls	1	0.0733746	47.7944	0.974595	0.000229832	1.66407e-07
database_2017_02_08_Traj1_R.mat	E1_LT1D14.819F0001.xls	1	0.0724396	74.3191	0.815928	0.000274131	2.22848e-07
database_2017_02_08_Traj1_R.mat	E1_LT1D15.000F0001.xls	1	0.0814471	81.4468	0.809664	0.000361062	8.56587e-08
database_2017_02_08_Traj1_R.mat	E1_LT1D8.202F0001.xls	1	0.116877	66.439	0.870942	0.000189919	2.14963e-08
database_2017_02_08_Traj1_R.mat	E1_LT1D8.434F0001.xls	1	0.0379633	39.966	0.86542	0.000167513	1.51649e-07
database_2017_02_08_Traj1_R.mat	E1_LT1D8.694F0001.xls	1	0.532778	35.7646	1.20122	0.000893658	1.36443e-07
database_2017_02_08_Traj1_R.mat	E1_LT1D8.895F0001.xls	1	0.0259686	35.2382	0.962953	8.18471e-05	7.73384e-07
database_2017_02_08_Traj1_R.mat	E1_LT1D9.119F0001.xls	1	0.343447	51.2593	0.927957	0.000609702	1.86836e-07
database_2017_02_08_Traj1_R.mat	E1_LT1D9.250F0001.xls	1	0.0867247	48.4682	0.958886	0.000351474	2.31143e-08
database_2017_02_08_Traj1_R.mat	E1_LT1D9.351F0001.xls	1	0.370124	14.8519	2.45315	0.000603457	7.05449e-08
database_2017_02_08_Traj1_R.mat	E1_LT1D9.490F0001.xls	1	0.513054	33.2209	0.878236	0.000415445	4.15989e-07
database_2017_02_08_Traj1_R.mat	E1_LT1D9.684F0001.xls	1	0.0214836	19.9608	2.07655	0.000738656	1.78503e-08
database_2017_02_08_Traj1_R.mat	E2_LT1D10.026F0001.xls	1	0.160908	78.7884	0.835568	0.000165908	2.66626e-07
database_2017_02_08_Traj1_R.mat	E2_LT1D10.276F0001.xls	1	0.0453332	42.2845	0.865133	0.000114606	6.89701e-08
database_2017_02_08_Traj1_R.mat	E2_LT1D10.505F0001.xls	1	0.0395415	60.927	0.927108	7.61884e-05	2.85578e-07
[truncated: 919 more rows]
