# Supplementary material for: What is the true discharge rate and pattern of the striatal projection neurons in Parkinson’s disease and Dystonia?
Source: eLife. 2020 Aug 19;9:e57445. doi: 10.7554/eLife.57445 (PMC7462612; doi:10.7554/eLife.57445)
Supplement: Figure 3—source data 2. [file elife-57445-fig3-data2.xls]

## Sheet: Sheet1
PD_info_Well_IsoUnits
Folder	Filename	Unit id	Iso.Sc	FR	CV ISI	BetaPowerMUA	BetaPowerSTA_LFP
database_2009_03_16_Traj1_R.mat	E1_07933.xls	1	0.856092	2.15319	3.98159	0.000389204
database_2009_03_16_Traj1_R.mat	E1_08109.xls	1	0.657202	7.02634	2.33113	0.000413354
database_2009_03_16_Traj1_R.mat	E1_14749.xls	1	0.714506	42.5312	0.717765	0.00052381
database_2009_03_16_Traj1_R.mat	E2_07933.xls	1	0.848139	17.7638	1.05961	0.000370846
database_2009_03_16_Traj1_R.mat	E2_09851.xls	1	0.911547	1.04909	2.56506	0.000670338
database_2009_03_16_Traj1_R.mat	E2_13671.xls	1	0.746748	5.06548	4.49652	0.000211033
database_2009_03_16_Traj1_R.mat	E1_08620.xls	2	0.683912	6.81905	3.59454	0.00473837
database_2009_03_16_Traj1_R.mat	E1_09660.xls	2	0.872772	13.1312	2.70676	0.00115318
database_2009_03_16_Traj1_R.mat	E1_12366.xls	2	0.656162	2.71309	1.33186	0.000243109
database_2009_03_16_Traj1_R.mat	E2_09660.xls	2	0.775455	2.39653	0.667397	0.000332061
database_2009_03_16_Traj1_R.mat	E1_07255.xls	3	0.747712	5.37715	4.25948	0.000453348
database_2009_03_16_Traj1_R.mat	E1_08448.xls	3	0.636604	0.546513	1.54615	0.000225723
database_2009_03_16_Traj1_R.mat	E1_09173.xls	3	0.76759	3.71836	2.68538	0.000205761
database_2009_03_16_Traj1_R.mat	E2_09365.xls	3	0.683261	5.35604	1.27604	0.000262981
database_2009_03_16_Traj2_L_updatedGPeBorder.mat	E2_14747.xls	1	0.723216	7.41129	1.53619	0.000229169
database_2009_03_16_Traj2_L_updatedGPeBorder.mat	E2_10658.xls	2	0.662819	11.6866	1.85445	0.000233984
database_2009_03_16_Traj2_L_updatedGPeBorder.mat	E2_12509.xls	2	0.807067	1.56339	1.58855	0.000302472
database_2009_03_16_Traj2_L_updatedGPeBorder.mat	E2_13653.xls	2	0.689865	33.935	1.14917	0.000665739
database_2009_03_16_Traj2_L_updatedGPeBorder.mat	E2_14040.xls	2	0.626512	26.5486	1.50668	0.00100687
database_2009_03_16_Traj2_L_updatedGPeBorder.mat	E2_13283.xls	3	0.793322	1.37541	1.33869	0.00093476
database_2009_03_16_Traj2_L_updatedGPeBorder.mat	E2_14040.xls	3	0.678467	13.2573	1.01909	0.00100687
database_2013_01_08_Traj1_R.mat	E2_13911.xls	3	0.659072	7.40199	1.9994	0.000149091
database_2013_01_29_Traj1_R.mat	E2_09389.xls	1	0.848349	9.43745	0.69054	0.00187097
database_2013_01_29_Traj1_R.mat	E2_09799.xls	1	0.702389	3.0028	5.13842	0.000477692
database_2013_01_29_Traj1_R.mat	E1_11134.xls	2	0.625003	1.19215	3.75027	0.00025034
database_2013_01_29_Traj1_R.mat	E1_11382.xls	2	0.783601	1.16113	1.79666	0.00023651
database_2013_01_29_Traj1_R.mat	E2_09634.xls	2	0.793906	6.01265	3.24311	0.00338631
database_2013_01_29_Traj1_R.mat	E2_10705.xls	2	0.79186	1.63885	2.49234	0.000272435
database_2013_01_29_Traj1_R.mat	E2_11382.xls	2	0.711417	2.49285	0.409184	0.00641619
database_2013_01_29_Traj1_R.mat	E2_14043.xls	2	0.773551	2.36831	0.501122	0.000985223
database_2013_01_29_Traj1_R.mat	E2_10876.xls	3	0.70536	4.0403	2.05336	0.000257166
database_2013_01_29_Traj1_R.mat	E2_12463.xls	4	0.751539	2.53503	0.494251	0.000157434
database_2014_07_01_Traj1_R_updatedGPeBorder.mat	E2_RT1D12.889F0001.xls	2	0.608537	11.163	1.48911	0.000209777	6.40615e-07
database_2014_07_01_Traj1_R_updatedGPeBorder.mat	E2_RT1D14.473F0001.xls	2	0.602395	0.804554	1.87392	0.000675698	1.61236e-05
database_2014_07_01_Traj1_R_updatedGPeBorder.mat	E1_RT1D13.529F0001.xls	3	0.842067	2.49279	2.98328	0.000251001	2.88695e-06
database_2014_07_01_Traj1_R_updatedGPeBorder.mat	E2_RT1D15.000F0001.xls	3	0.81107	1.03181	2.3052	8.76503e-05	1.73267e-05
database_2014_07_01_Traj1_R_updatedGPeBorder.mat	E1_RT1D14.812F0001.xls	5	0.678467	0.676427	1.36251	9.80115e-05	1.26538e-05
database_2016_07_13_Traj1_R.mat	E2_RT1D11.977F0001.xls	3	0.616282	3.21062	2.85192	0.000392574	5.57685e-06
database_2016_07_13_Traj1_R.mat	E2_RT1D15.000F0001.xls	3	0.659293	1.01874	1.64237	0.000301714	4.15286e-07
database_2016_07_13_Traj2_L.mat	E1_LT1D14.021F0001.xls	1	0.805274	58.9762	1.15926	0.000166276	2.34674e-08
database_2016_07_17_Traj2_L.mat	E1_LT1D14.184F0001.xls	1	0.606117	4.29187	1.63501	0.00103468	5.78243e-06
database_2016_07_17_Traj2_L.mat	E1_LT1D14.696F0001.xls	1	0.63467	41.0817	1.1904	0.00132167	5.71364e-07
database_2016_07_17_Traj2_L.mat	E1_LT1D14.036F0001.xls	2	0.729823	9.11854	4.32193	0.000818914	3.09874e-06
database_2016_07_17_Traj2_L.mat	E1_LT1D12.667F0001.xls	3	0.739261	3.86999	0.881154	0.000282436	2.56582e-06
database_2016_07_17_Traj2_L.mat	E1_LT1D13.070F0001.xls	4	1	0.283428	1.48148	0.00048294	5.31891e-06
database_2016_09_04_Traj1_R_updatedGPeBorder.mat	E1_RT1D12.498F0001.xls	1	0.78388	2.3263	1.4216	0.000692571	1.77921e-05
database_2016_09_04_Traj1_R_updatedGPeBorder.mat	E1_RT1D12.904F0001.xls	1	0.707296	2.92751	1.95914	0.000591788	1.35732e-05
database_2016_09_04_Traj1_R_updatedGPeBorder.mat	E1_RT1D14.102F0002.xls	1	0.683439	9.59981	3.9029	0.000909263	4.50853e-06
database_2016_09_04_Traj1_R_updatedGPeBorder.mat	E1_RT1D12.629F0001.xls	2	0.692782	5.38094	4.55201	0.000429105	1.18456e-06
database_2016_09_04_Traj1_R_updatedGPeBorder.mat	E2_RT1D13.692F0001.xls	2	0.90826	5.8211	1.84877	0.000581626	9.49847e-06
database_2016_09_04_Traj1_R_updatedGPeBorder.mat	E1_RT1D12.752F0001.xls	3	0.624416	1.43723	2.99465	0.000786069	1.11701e-06
database_2016_09_04_Traj1_R_updatedGPeBorder.mat	E2_RT1D13.796F0001.xls	3	0.828858	0.320026	1.45159	0.000453255	0.000155136
database_2016_09_04_Traj2_L.mat	E1_LT1D10.835F0001.xls	1	0.701981	28.4267	4.02518	0.000285269	1.24512e-08
database_2016_09_04_Traj2_L.mat	E1_LT1D12.838F0001.xls	1	0.736014	14.5758	1.58212	0.000292707	7.11425e-07
database_2016_09_04_Traj2_L.mat	E2_LT1D11.788F0002.xls	1	0.609369	27.9217	1.6352	0.000957135	1.25954e-07
database_2016_09_04_Traj2_L.mat	E1_LT1D13.644F0001.xls	2	0.66862	8.38443	4.69843	0.000775257	7.88583e-06
database_2016_09_04_Traj2_L.mat	E2_LT1D13.242F0001.xls	2	0.773621	9.01935	2.27379	0.000491343	9.49691e-07
database_2016_09_04_Traj2_L.mat	E1_LT1D11.400F0001.xls	3	0.636115	2.46933	1.52288	0.000238045	8.62253e-06
database_2016_09_04_Traj2_L.mat	E1_LT1D14.039F0001.xls	3	0.61181	0.649918	0.644859	0.000101487
database_2016_09_04_Traj2_L.mat	E2_LT1D12.637F0001.xls	3	0.767208	2.98726	3.04983	0.000909007	9.28712e-07
database_2016_09_11_Traj1_L_updatedGPeBorder.mat	E1_LT1D11.895F0002.xls	1	0.611868	8.05935	9.95481	0.000684388	1.2652e-07
database_2016_09_11_Traj1_L_updatedGPeBorder.mat	E1_LT1D9.886F0001.xls	1	0.624033	28.2404	0.573494	0.00018381	5.13044e-07
database_2016_10_19_Traj1_R_updatedGPeBorder.mat	E1_RT1D12.026F0001.xls	1	0.825565	26.4965	1.93967	0.00046643	4.52172e-08
database_2016_10_19_Traj1_R_updatedGPeBorder.mat	E1_RT1D9.762F0001.xls	2	0.791974	4.65233	0.896383	0.00045663	4.11289e-07
database_2016_10_19_Traj2_L.mat	E1_LT1D14.194F0001.xls	1	0.877746	2.68661	0.46691	0.000186205	5.99596e-08
database_2016_10_19_Traj2_L.mat	E2_LT1D14.595F0001.xls	1	0.727815	23.9057	0.876915	0.000512618	1.37961e-06
database_2016_10_19_Traj2_L.mat	E2_LT1D14.696F0001.xls	1	0.729861	29.2872	0.790602	0.000442128	4.38697e-06
database_2016_10_19_Traj2_L.mat	E2_LT1D7.125F0001.xls	1	0.801168	7.03108	0.960228	0.000814986	9.90614e-07
database_2016_10_19_Traj2_L.mat	E2_LT1D7.527F0001.xls	1	0.722488	4.56739	1.09936	0.000259032	6.05738e-08
database_2016_10_19_Traj2_L.mat	E2_LT1D12.352F0001.xls	2	0.612739	4.11588	0.686029	0.000202063	1.67952e-06
database_2016_10_19_Traj2_L.mat	E2_LT1D7.927F0001.xls	2	0.928268	2.94513	2.01087	0.000156004	1.0776e-06
database_2016_10_19_Traj2_L.mat	E2_LT1D9.130F0001.xls	2	0.798663	6.89086	1.7045	0.000227743	2.67006e-07
database_2016_10_19_Traj2_L.mat	E2_LT1D13.459F0001.xls	3	0.67279	1.21298	1.14235	0.000124744
database_2016_11_03_Traj1_L_updatedGPeBorder.mat	E2_LT1D13.389F0001.xls	1	0.711467	6.3168	1.36809	0.000818963	9.25442e-06
database_2016_11_03_Traj1_L_updatedGPeBorder.mat	E2_LT1D14.192F0001.xls	1	0.685205	11.6985	0.835687	0.000450273	9.83328e-06
database_2016_11_03_Traj1_L_updatedGPeBorder.mat	E1_LT1D14.898F0002.xls	3	0.618612	1.89207	0.486274	0.00013835	2.69867e-05
database_2016_11_03_Traj2_R.mat	E1_RT1D13.395F0001.xls	1	0.660651	22.2758	1.36216	0.000741316	2.81027e-06
database_2016_11_03_Traj2_R.mat	E1_RT1D13.998F0001.xls	1	0.8468	17.0794	2.9784	0.00069936	2.52062e-06
database_2016_11_03_Traj2_R.mat	E1_RT1D8.827F0001.xls	1	0.628266	9.4901	1.21121	0.000451299	6.12563e-06
database_2016_11_03_Traj2_R.mat	E2_RT1D9.831F0001.xls	1	0.676981	6.2014	1.78248	0.000219721	9.4272e-07
database_2016_11_03_Traj2_R.mat	E1_RT1D14.199F0001.xls	4	0.691371	2.76728	5.81132	0.000156152	1.95185e-07
database_2017_02_08_Traj1_R.mat	E1_LT1D14.189F0001.xls	1	0.601088	49.8339	0.878312	0.000573638	8.72837e-08
database_2017_02_08_Traj1_R.mat	E2_LT1D13.756F0001.xls	1	0.62178	14.2778	1.22331	0.000500331	3.13094e-07
database_2017_02_08_Traj1_R.mat	E1_LT1D9.119F0001.xls	3	0.734855	1.42784	1.45923	0.000609702	7.31747e-06
database_2017_02_08_Traj1_R.mat	E2_LT1D14.073F0001.xls	3	0.999982	2.73815	0.61858	0.000183306	2.83026e-07
database_2017_02_08_Traj1_R.mat	E1_LT1D9.684F0001.xls	4	0.655274	3.75732	2.98445	0.000738656	5.04149e-07
database_2017_02_08_Traj1_R.mat	E2_LT1D13.493F0001.xls	4	0.812123	16.153	2.75771	0.000863573	5.3185e-08
database_2018_02_07_Traj1_L.mat	E1_LT1D12.633F0001.xls	1	0.778233	2.41077	0.449069	0.00057948	0.000214973
database_2018_02_07_Traj1_L.mat	E1_LT1D12.735F0001.xls	1	0.808931	12.4258	1.4017	0.000730514	1.0231e-06
database_2018_02_07_Traj1_L.mat	E1_LT1D13.785F0001.xls	1	0.80223	24.8264	1.80051	0.000868965	2.86662e-06
database_2018_02_07_Traj1_L.mat	E1_LT1D13.989F0001.xls	1	0.799587	25.195	3.06049	0.000652815	2.17704e-06
database_2018_02_07_Traj1_L.mat	E2_LT1D11.423F0001.xls	1	0.829097	34.3101	0.573281	0.000678907	4.33449e-07
database_2018_02_07_Traj1_L.mat	E2_LT1D11.720F0001.xls	1	0.622009	50.6262	0.876002	0.000917314	9.8262e-07
database_2018_02_07_Traj1_L.mat	E2_LT1D12.938F0001.xls	1	0.638596	46.323	0.8358	0.000505891	1.04903e-06
database_2018_02_07_Traj1_L.mat	E2_LT1D13.482F0001.xls	1	0.624465	63.5533	1.08092	0.000711484	1.59053e-06
database_2018_02_07_Traj1_L.mat	E2_LT1D14.700F0001.xls	1	0.663985	3.67124	0.832105	0.000593252	4.08759e-05
database_2018_02_07_Traj1_L.mat	E2_LT1D11.323F0001.xls	2	0.684144	46.241	0.796768	0.000719026	3.08023e-06
database_2018_02_07_Traj1_L.mat	E2_LT1D14.396F0001.xls	2	0.914087	3.86007	1.4007	0.000170281	0.00011532
database_2018_02_07_Traj1_L.mat	E1_LT1D14.899F0002.xls	3	0.607074	4.83615	0.935734	9.1407e-05	2.45162e-05
database_2018_02_07_Traj1_L.mat	E2_LT1D12.024F0001.xls	3	0.722818	8.32114	1.15479	0.000646484	1.05828e-06
database_2018_02_07_Traj1_L.mat	E2_LT1D13.684F0001.xls	3	0.732122	1.53902	1.30209	0.000266563	6.56881e-05
database_2018_02_07_Traj2_R.mat	E1_RT1D12.244F0001.xls	1	0.665947	34.4282	1.22836	0.000443967	7.6874e-07
database_2018_02_07_Traj2_R.mat	E2_RT1D13.286F0001.xls	1	0.676191	53.2805	0.828575	0.000240813	4.52623e-08
database_2018_10_31_Traj1_L.mat	E2_LT1D12.981F0001.xls	1	0.703517	11.9514	1.25	0.00139008	1.45574e-06
database_2018_10_31_Traj1_L.mat	E2_LT1D13.683F0001.xls	1	0.622824	9.5424	1.63313	0.000644938	4.60291e-06
database_2018_10_31_Traj1_L.mat	E2_LT1D14.188F0001.xls	1	0.722676	26.5419	1.3003	0.000341951	1.05405e-06
database_2018_10_31_Traj1_L.mat	E2_LT1D14.490F0001.xls	2	0.600795	6.20724	5.16214	0.000315934	3.41473e-08
database_2019_02_26_Traj1_L.mat	E2_LT1D12.523F0001.xls	1	0.708793	11.4324	0.783203	0.00115236	5.35958e-06
database_2019_02_26_Traj2_R.mat	E2_RT1D12.498F0001.xls	1	0.633629	13.5027	1.39075	0.000804486	1.21237e-06
database_2019_02_26_Traj2_R.mat	E2_RT1D9.377F0001.xls	3	0.698556	9.74655	0.809663	0.00042002	4.18772e-06
database_2019_05_15_Traj2_L.mat	E1_LT1D12.023F0001.xls	1	0.704677	22.2261	1.96904	0.00103037	1.71287e-06
database_2019_05_15_Traj2_L.mat	E1_LT1D9.310F0001.xls	2	0.706941	28.5254	1.42198	0.000521934	1.15889e-06
database_2019_05_15_Traj2_L.mat	E1_LT1D10.318F0001.xls	3	0.964121	1.07784	2.01815	0.00129395	0.000161426
database_2019_06_19_Traj1_R.mat	E2_RT1D10.322F0001.xls	1	0.793598	3.84489	1.38205	0.000401708	6.40371e-07
database_2019_06_19_Traj1_R.mat	E2_RT1D10.698F0001.xls	3	0.762153	1.31311	2.41098	5.28927e-05	2.301e-06
