# Supplementary material for: What is the true discharge rate and pattern of the striatal projection neurons in Parkinson’s disease and Dystonia?
Source: eLife. 2020 Aug 19;9:e57445. doi: 10.7554/eLife.57445 (PMC7462612; doi:10.7554/eLife.57445)
Supplement: Figure 3—source data 4. [file elife-57445-fig3-data4.xls]

## Sheet: Sheet1
DYST_info_AllUnits
Folder	Filename	Unit id	Iso.Sc	FR	CV ISI	BetaPowerMUA	BetaPowerSTA_LFP
database_2009_01_05_Traj1_R.mat	E2_09006.xls	1	0.0490392	27.594	1.38337	0.000555036
database_2009_01_05_Traj1_R.mat	E2_09099.xls	1	0.47896	19.3314	1.5052	0.000270494
database_2009_01_05_Traj1_R.mat	E2_09199.xls	1	0.0359948	17.1986	1.00037	0.000176432
database_2009_01_05_Traj1_R.mat	E2_09298.xls	1	0.0687179	24.8573	0.995285	0.000121249
database_2009_01_05_Traj1_R.mat	E2_09398.xls	1	0.0190462	18.9619	1.02762	9.53737e-05
database_2009_01_05_Traj1_R.mat	E2_09590.xls	1	0.0501268	17.601	1.0799	0.00029129
database_2009_01_05_Traj1_R.mat	E2_09683.xls	1	0.0777611	20.6072	1.04049	9.8777e-05
database_2009_01_05_Traj1_R.mat	E2_09773.xls	1	0.0213621	14.5359	1.00521	0.000100153
database_2009_01_05_Traj1_R.mat	E2_09864.xls	1	0.0282623	15.1184	0.963884	0.000168188
database_2009_01_05_Traj1_R.mat	E2_09956.xls	1	0.0672859	17.2305	0.981757	0.000134059
database_2009_01_05_Traj1_R.mat	E2_10242.xls	1	0.0317039	16.02	0.942661	0.000210751
database_2009_01_05_Traj1_R.mat	E2_10587.xls	1	0.103249	44.2331	1.02676	0.000190538
database_2009_01_05_Traj1_R.mat	E2_10744.xls	1	0.105737	37.1046	0.986036	0.000885974
database_2009_01_05_Traj1_R.mat	E2_10823.xls	1	0.357603	20.6867	1.82305	0.000665318
database_2009_01_05_Traj1_R.mat	E2_10996.xls	1	0.0632235	29.2103	0.909256	0.000380124
database_2009_01_05_Traj1_R.mat	E2_11327.xls	1	0.523689	21.4698	1.65225	0.000360784
database_2009_01_05_Traj1_R.mat	E2_11643.xls	1	0.0965597	47.1129	1.18759	0.00094172
database_2009_01_05_Traj1_R.mat	E2_11959.xls	1	0.12693	51.8776	1.09456	0.000451859
database_2009_01_05_Traj1_R.mat	E2_12151.xls	1	0.093201	54.5528	1.08521	0.000566306
database_2009_01_05_Traj1_R.mat	E2_12286.xls	1	0.118479	50.3547	1.22737	0.00128161
database_2009_01_05_Traj1_R.mat	E2_12434.xls	1	0.0893321	49.1258	0.990363	0.00052562
database_2009_01_05_Traj1_R.mat	E2_12680.xls	1	0.228113	24.8939	1.5214	0.000357204
database_2009_01_05_Traj1_R.mat	E2_13000.xls	1	0.0525714	8.59371	1.25662	0.00109121
database_2009_01_05_Traj1_R.mat	E2_09006.xls	2	0.474615	7.31598	1.50095	0.000555036
database_2009_01_05_Traj1_R.mat	E2_09099.xls	2	0.0944338	56.4758	0.98156	0.000270494
database_2009_01_05_Traj1_R.mat	E2_09199.xls	2	0.0577693	15.277	0.901938	0.000176432
database_2009_01_05_Traj1_R.mat	E2_09298.xls	2	0.0428401	21.054	1.07641	0.000121249
database_2009_01_05_Traj1_R.mat	E2_09398.xls	2	0.0416791	16.0937	1.09266	9.53737e-05
database_2009_01_05_Traj1_R.mat	E2_09590.xls	2	0.045639	21.0679	1.09613	0.00029129
database_2009_01_05_Traj1_R.mat	E2_09683.xls	2	0.046527	23.9132	1.02082	9.8777e-05
database_2009_01_05_Traj1_R.mat	E2_09773.xls	2	0.0250572	11.9559	1.02426	0.000100153
database_2009_01_05_Traj1_R.mat	E2_09864.xls	2	0.0661603	12.1254	0.931555	0.000168188
database_2009_01_05_Traj1_R.mat	E2_09956.xls	2	0.0641036	15.0863	0.963347	0.000134059
database_2009_01_05_Traj1_R.mat	E2_10242.xls	2	0.101582	6.81703	1.3068	0.000210751
database_2009_01_05_Traj1_R.mat	E2_10587.xls	2	0.127978	24.1139	1.20218	0.000190538
database_2009_01_05_Traj1_R.mat	E2_10744.xls	2	0.554595	11.7242	1.54915	0.000885974
database_2009_01_05_Traj1_R.mat	E2_10823.xls	2	0.0770151	49.8129	1.13538	0.000665318
database_2009_01_05_Traj1_R.mat	E2_10996.xls	2	0.476979	8.57438	1.60921	0.000380124
database_2009_01_05_Traj1_R.mat	E2_11327.xls	2	0.0617686	48.1426	0.979608	0.000360784
database_2009_01_05_Traj1_R.mat	E2_11643.xls	2	0.518786	29.1501	1.57912	0.00094172
database_2009_01_05_Traj1_R.mat	E2_11959.xls	2	0.523266	18.2824	2.66539	0.000451859
database_2009_01_05_Traj1_R.mat	E2_12151.xls	2	0.629354	13.2604	2.30693	0.000566306
database_2009_01_05_Traj1_R.mat	E2_12286.xls	2	0.473513	24.343	1.75712	0.00128161
database_2009_01_05_Traj1_R.mat	E2_12434.xls	2	0.405828	19.7681	1.59059	0.00052562
database_2009_01_05_Traj1_R.mat	E2_12680.xls	2	0.0846034	37.5522	1.00122	0.000357204
database_2009_01_05_Traj1_R.mat	E2_13000.xls	2	0.053191	19.8077	0.975046	0.00109121
database_2009_01_05_Traj1_R.mat	E2_09006.xls	3	0.0869907	31.6098	1.05616	0.000555036
database_2009_01_05_Traj1_R.mat	E2_09199.xls	3	0.0303983	14.4122	1.01297	0.000176432
database_2009_01_05_Traj1_R.mat	E2_09298.xls	3	0.0299853	23.2273	1.06194	0.000121249
database_2009_01_05_Traj1_R.mat	E2_09398.xls	3	0.0471454	15.1376	0.904123	9.53737e-05
database_2009_01_05_Traj1_R.mat	E2_09590.xls	3	0.0649758	16.6676	1.01643	0.00029129
database_2009_01_05_Traj1_R.mat	E2_09683.xls	3	0.0304611	23.1418	0.99304	9.8777e-05
database_2009_01_05_Traj1_R.mat	E2_09773.xls	3	0.0455112	17.5563	0.977223	0.000100153
database_2009_01_05_Traj1_R.mat	E2_09864.xls	3	0.619738	1.38138	2.23122	0.000168188
database_2009_01_05_Traj1_R.mat	E2_09956.xls	3	0.178633	4.05874	1.84297	0.000134059
database_2009_01_05_Traj1_R.mat	E2_10242.xls	3	0.0318788	18.5196	0.949394	0.000210751
database_2009_01_05_Traj1_R.mat	E2_10744.xls	3	0.0268157	18.8521	0.948455	0.000885974
database_2009_01_05_Traj1_R.mat	E2_10996.xls	3	0.0479445	27.2274	0.999371	0.000380124
database_2009_01_05_Traj1_R.mat	E2_13000.xls	3	0.0877833	14.3007	0.969894	0.00109121
database_2009_01_05_Traj1_R.mat	E2_09006.xls	4	0.073214	3.61823	2.64097	0.000555036
database_2009_01_05_Traj1_R.mat	E2_09199.xls	4	0.00858509	10.2807	1.20181	0.000176432
database_2009_01_05_Traj1_R.mat	E2_09398.xls	4	0.0142501	12.3491	0.938639	9.53737e-05
database_2009_01_05_Traj1_R.mat	E2_09590.xls	4	0.013969	9.60056	1.34275	0.00029129
database_2009_01_05_Traj1_R.mat	E2_09773.xls	4	0.0331724	11.3267	1.00751	0.000100153
database_2009_01_05_Traj1_R.mat	E2_09864.xls	4	0.0360263	12.3173	0.987893	0.000168188
database_2009_01_05_Traj1_R.mat	E2_09956.xls	4	0.0152275	12.942	0.962883	0.000134059
database_2009_01_05_Traj1_R.mat	E2_10242.xls	4	0.0308365	15.6792	1.11994	0.000210751
database_2009_01_05_Traj1_R.mat	E2_13000.xls	4	0.0422614	15.4332	1.00781	0.00109121
database_2009_01_05_Traj1_R.mat	E2_09864.xls	5	0.0232659	18.1114	0.952713	0.000168188
database_2009_01_05_Traj1_R.mat	E2_09956.xls	5	0.0271238	16.1584	0.931581	0.000134059
database_2009_01_05_Traj2_L.mat	E1_08980.xls	1	0.0271691	13.486	0.879406	0.000111275
database_2009_01_05_Traj2_L.mat	E1_09179.xls	1	0.0211481	14.8494	1.04644	0.000118975
database_2009_01_05_Traj2_L.mat	E1_09357.xls	1	0.0292067	17.6323	1.00791	0.000290332
database_2009_01_05_Traj2_L.mat	E1_09548.xls	1	0.0365639	14.6336	0.88021	0.000117829
database_2009_01_05_Traj2_L.mat	E1_09726.xls	1	0.0530183	22.5438	0.849425	0.000114586
database_2009_01_05_Traj2_L.mat	E1_09863.xls	1	0.645048	36.5722	0.822625	0.00016999
database_2009_01_05_Traj2_L.mat	E1_10062.xls	1	0.0193455	14.7308	0.96569	0.000109767
database_2009_01_05_Traj2_L.mat	E1_10253.xls	1	0.026797	19.7486	1.42773	0.000112286
database_2009_01_05_Traj2_L.mat	E1_10429.xls	1	0.399564	23.3477	0.964188	0.000146452
database_2009_01_05_Traj2_L.mat	E1_10579.xls	1	0.0965412	27.525	0.957859	0.00014262
database_2009_01_05_Traj2_L.mat	E1_10820.xls	1	0.0603398	20.6488	1.00418	0.00018998
database_2009_01_05_Traj2_L.mat	E1_10974.xls	1	0.671663	16.8388	1.23658	0.00024149
database_2009_01_05_Traj2_L.mat	E1_11301.xls	1	0.0254719	17.975	1.01869	0.000182342
database_2009_01_05_Traj2_L.mat	E1_11615.xls	1	0.322621	26.5587	1.28831	0.000251374
database_2009_01_05_Traj2_L.mat	E1_11864.xls	1	0.336007	22.285	0.828741	0.000209429
database_2009_01_05_Traj2_L.mat	E1_12192.xls	1	0.0486863	24.0376	0.939824	0.000355319
database_2009_01_05_Traj2_L.mat	E1_12513.xls	1	0.0389583	18.897	0.96791	0.000106607
database_2009_01_05_Traj2_L.mat	E1_12780.xls	1	0.0264561	14.4862	1.06962	0.00010302
database_2009_01_05_Traj2_L.mat	E1_13011.xls	1	0.0952342	51.2858	0.9317	0.000276251
database_2009_01_05_Traj2_L.mat	E2_09548.xls	1	0.0295672	18.0009	1.05767	9.76066e-05
database_2009_01_05_Traj2_L.mat	E2_09726.xls	1	0.0329793	18.9041	0.886758	9.70928e-05
database_2009_01_05_Traj2_L.mat	E2_10253.xls	1	0.0919853	56.9607	0.832647	0.000234319
database_2009_01_05_Traj2_L.mat	E2_10429.xls	1	0.10915	52.554	1.10383	0.000870116
database_2009_01_05_Traj2_L.mat	E2_10820.xls	1	0.102048	53.3414	0.920737	0.000452408
database_2009_01_05_Traj2_L.mat	E2_12192.xls	1	0.496122	31.5704	4.90557	0.000960945
database_2009_01_05_Traj2_L.mat	E2_13011.xls	1	0.571141	9.85032	2.34343	0.000395003
database_2009_01_05_Traj2_L.mat	E1_08980.xls	2	0.0444532	15.3916	1.0512	0.000111275
database_2009_01_05_Traj2_L.mat	E1_09179.xls	2	0.0432894	17.3341	0.882458	0.000118975
database_2009_01_05_Traj2_L.mat	E1_09357.xls	2	0.0325883	16.1957	0.96688	0.000290332
database_2009_01_05_Traj2_L.mat	E1_09548.xls	2	0.0186687	12.7413	0.90496	0.000117829
database_2009_01_05_Traj2_L.mat	E1_09726.xls	2	0.0916098	20.2786	0.923685	0.000114586
database_2009_01_05_Traj2_L.mat	E1_09863.xls	2	0.0616537	41.2184	1.04521	0.00016999
database_2009_01_05_Traj2_L.mat	E1_10062.xls	2	0.0540602	11.9799	1.05687	0.000109767
database_2009_01_05_Traj2_L.mat	E1_10253.xls	2	0.0375004	16.4382	0.968786	0.000112286
database_2009_01_05_Traj2_L.mat	E1_10429.xls	2	0.0613246	42.2881	0.927717	0.000146452
database_2009_01_05_Traj2_L.mat	E1_10579.xls	2	0.0530973	34.268	1.03554	0.00014262
database_2009_01_05_Traj2_L.mat	E1_10820.xls	2	0.0455968	16.7327	0.992587	0.00018998
database_2009_01_05_Traj2_L.mat	E1_10974.xls	2	0.0725889	44.2735	0.970217	0.00024149
database_2009_01_05_Traj2_L.mat	E1_11301.xls	2	0.0500767	12.2165	0.962823	0.000182342
database_2009_01_05_Traj2_L.mat	E1_11615.xls	2	0.0647771	35.7148	1.0297	0.000251374
database_2009_01_05_Traj2_L.mat	E1_11864.xls	2	0.0565177	38.3261	0.945427	0.000209429
database_2009_01_05_Traj2_L.mat	E1_12192.xls	2	0.041627	15.7205	1.01838	0.000355319
database_2009_01_05_Traj2_L.mat	E1_12513.xls	2	0.0351605	16.0625	1.14249	0.000106607
database_2009_01_05_Traj2_L.mat	E1_12780.xls	2	0.0222637	15.4468	1.02052	0.00010302
database_2009_01_05_Traj2_L.mat	E1_13011.xls	2	0.265491	14.395	1.36451	0.000276251
database_2009_01_05_Traj2_L.mat	E2_09548.xls	2	0.0362937	18.3786	0.865729	9.76066e-05
database_2009_01_05_Traj2_L.mat	E2_09726.xls	2	0.0342352	13.0709	1.13741	9.70928e-05
database_2009_01_05_Traj2_L.mat	E2_10253.xls	2	0.726453	5.70749	3.00071	0.000234319
database_2009_01_05_Traj2_L.mat	E2_10429.xls	2	0.617434	25.7303	1.83037	0.000870116
database_2009_01_05_Traj2_L.mat	E2_10820.xls	2	0.524173	7.5692	2.41717	0.000452408
database_2009_01_05_Traj2_L.mat	E2_12192.xls	2	0.0576361	15.2351	1.81753	0.000960945
database_2009_01_05_Traj2_L.mat	E2_13011.xls	2	0.0651083	52.9227	0.96116	0.000395003
database_2009_01_05_Traj2_L.mat	E1_08980.xls	3	0.0486757	11.4338	1.15841	0.000111275
database_2009_01_05_Traj2_L.mat	E1_09179.xls	3	0.0485597	12.0392	1.03452	0.000118975
database_2009_01_05_Traj2_L.mat	E1_09357.xls	3	0.0566436	12.0823	1.02217	0.000290332
database_2009_01_05_Traj2_L.mat	E1_09548.xls	3	0.014193	13.7505	1.09947	0.000117829
database_2009_01_05_Traj2_L.mat	E1_09726.xls	3	0.075083	23.191	1.16293	0.000114586
database_2009_01_05_Traj2_L.mat	E1_10062.xls	3	0.0332884	16.5648	0.967854	0.000109767
database_2009_01_05_Traj2_L.mat	E1_10253.xls	3	0.0193707	18.7212	0.984691	0.000112286
database_2009_01_05_Traj2_L.mat	E1_10820.xls	3	0.037912	23.2122	0.955043	0.00018998
database_2009_01_05_Traj2_L.mat	E1_11301.xls	3	0.0729306	15.4725	1.0745	0.000182342
database_2009_01_05_Traj2_L.mat	E1_12192.xls	3	0.0272912	18.0329	1.08099	0.000355319
database_2009_01_05_Traj2_L.mat	E1_12513.xls	3	0.0271417	12.703	0.887849	0.000106607
database_2009_01_05_Traj2_L.mat	E1_12780.xls	3	0.0443904	12.6153	0.955703	0.00010302
database_2009_01_05_Traj2_L.mat	E2_09548.xls	3	0.0400406	18.1268	1.06355	9.76066e-05
database_2009_01_05_Traj2_L.mat	E2_09726.xls	3	0.0237164	16.9597	0.807765	9.70928e-05
database_2009_01_05_Traj2_L.mat	E2_12192.xls	3	0.079647	31.328	1.37318	0.000960945
database_2009_01_05_Traj2_L.mat	E1_08980.xls	4	0.0329822	11.4338	1.11779	0.000111275
database_2009_01_05_Traj2_L.mat	E1_09179.xls	4	0.023813	14.4944	0.92318	0.000118975
database_2009_01_05_Traj2_L.mat	E1_09357.xls	4	0.0191979	11.9963	1.02216	0.000290332
database_2009_01_05_Traj2_L.mat	E1_09548.xls	4	0.0216947	14.5074	0.986187	0.000117829
database_2009_01_05_Traj2_L.mat	E1_10062.xls	4	0.0363716	15.3224	0.988737	0.000109767
database_2009_01_05_Traj2_L.mat	E1_11301.xls	4	0.0123475	12.7816	1.03235	0.000182342
database_2009_01_05_Traj2_L.mat	E1_12513.xls	4	0.0174864	11.8631	1.23523	0.000106607
database_2009_01_05_Traj2_L.mat	E1_12780.xls	4	0.0542071	13.5255	1.03721	0.00010302
database_2009_01_05_Traj2_L.mat	E2_09726.xls	4	0.0132283	11.6666	0.883803	9.70928e-05
database_2009_01_05_Traj2_L.mat	E2_12192.xls	4	0.713975	10.4427	3.31859	0.000960945
database_2009_07_16_Traj1_L.mat	E1_13051.xls	1	0.468862	9.43152	5.24605	0.000347619
database_2009_07_16_Traj1_L.mat	E1_13313.xls	1	0.0428032	23.2008	1.00061	0.000173949
database_2009_07_16_Traj1_L.mat	E1_13642.xls	1	0.0404468	20.9517	0.927303	0.000196994
database_2009_07_16_Traj1_L.mat	E1_13977.xls	1	0.122746	33.2996	0.990771	0.000149982
database_2009_07_16_Traj1_L.mat	E1_14316.xls	1	0.0762677	35.3076	0.935062	0.000917359
database_2009_07_16_Traj1_L.mat	E1_14577.xls	1	0.130837	34.1425	1.0768	0.000220109
database_2009_07_16_Traj1_L.mat	E1_14747.xls	1	0.123353	53.5575	0.903383	0.000402061
database_2009_07_16_Traj1_L.mat	E1_15000.xls	1	0.0565093	25.7917	0.939447	0.000125838
database_2009_07_16_Traj1_L.mat	E2_12057.xls	1	0.0582043	33.8768	0.877736	0.000105118
database_2009_07_16_Traj1_L.mat	E2_12233.xls	1	0.0573288	32.7318	0.917774	0.000112122
database_2009_07_16_Traj1_L.mat	E2_12410.xls	1	0.0412379	27.6327	0.914246	0.000120519
database_2009_07_16_Traj1_L.mat	E2_12556.xls	1	0.0591601	30.5405	0.900022	0.000133656
database_2009_07_16_Traj1_L.mat	E2_12795.xls	1	0.0618783	38.8752	0.930992	0.000194745
database_2009_07_16_Traj1_L.mat	E2_13051.xls	1	0.0810219	20.9805	0.954951	0.000273388
database_2009_07_16_Traj1_L.mat	E2_13642.xls	1	0.0441002	32.565	0.888721	0.000176339
database_2009_07_16_Traj1_L.mat	E2_13977.xls	1	0.100637	41.1586	0.982248	0.000238225
database_2009_07_16_Traj1_L.mat	E2_14316.xls	1	0.122928	46.3028	0.910284	0.000419514
database_2009_07_16_Traj1_L.mat	E2_14577.xls	1	0.102518	47.8856	0.960761	0.000207212
database_2009_07_16_Traj1_L.mat	E2_14747.xls	1	0.0524716	30.0992	0.862824	0.000177534
database_2009_07_16_Traj1_L.mat	E2_15000.xls	1	0.0653412	32.9115	0.877784	0.000104788
database_2009_07_16_Traj1_L.mat	E1_13051.xls	2	0.0934784	62.7222	0.891346	0.000347619
database_2009_07_16_Traj1_L.mat	E1_13313.xls	2	0.105763	14.6235	0.996139	0.000173949
database_2009_07_16_Traj1_L.mat	E1_13642.xls	2	0.209672	10.9258	1.56122	0.000196994
database_2009_07_16_Traj1_L.mat	E1_13977.xls	2	0.0604766	30.7282	1.01455	0.000149982
database_2009_07_16_Traj1_L.mat	E1_14316.xls	2	0.217722	7.47063	1.51195	0.000917359
database_2009_07_16_Traj1_L.mat	E1_14577.xls	2	0.0757188	46.7694	0.968619	0.000220109
database_2009_07_16_Traj1_L.mat	E1_14747.xls	2	0.750619	15.7669	1.82826	0.000402061
database_2009_07_16_Traj1_L.mat	E1_15000.xls	2	0.077032	15.2137	0.952118	0.000125838
database_2009_07_16_Traj1_L.mat	E2_12057.xls	2	0.0614261	30.3374	1.10005	0.000105118
database_2009_07_16_Traj1_L.mat	E2_12233.xls	2	0.087781	23.5304	0.954542	0.000112122
database_2009_07_16_Traj1_L.mat	E2_12410.xls	2	0.0593008	26.4162	0.901664	0.000120519
database_2009_07_16_Traj1_L.mat	E2_12556.xls	2	0.051115	21.6521	0.960594	0.000133656
database_2009_07_16_Traj1_L.mat	E2_12795.xls	2	0.134338	10.8301	0.977025	0.000194745
database_2009_07_16_Traj1_L.mat	E2_13051.xls	2	0.0569213	30.77	0.954803	0.000273388
database_2009_07_16_Traj1_L.mat	E2_13642.xls	2	0.0591076	17.7627	1.12468	0.000176339
database_2009_07_16_Traj1_L.mat	E2_13977.xls	2	0.448416	2.70103	3.02799	0.000238225
database_2009_07_16_Traj1_L.mat	E2_14316.xls	2	0.513911	9.42053	1.21848	0.000419514
database_2009_07_16_Traj1_L.mat	E2_14577.xls	2	0.0803799	55.8181	0.868639	0.000207212
database_2009_07_16_Traj1_L.mat	E2_14747.xls	2	0.102351	30.5373	0.983331	0.000177534
database_2009_07_16_Traj1_L.mat	E2_15000.xls	2	0.0865524	24.0771	0.971931	0.000104788
database_2009_07_16_Traj1_L.mat	E1_13313.xls	3	0.0581125	22.4977	1.04964	0.000173949
database_2009_07_16_Traj1_L.mat	E1_13642.xls	3	0.0671818	25.322	0.995849	0.000196994
database_2009_07_16_Traj1_L.mat	E1_13977.xls	3	0.73247	0.77142	0.624549	0.000149982
database_2009_07_16_Traj1_L.mat	E1_14316.xls	3	0.0474598	28.1927	0.988962	0.000917359
database_2009_07_16_Traj1_L.mat	E1_15000.xls	3	0.0307419	22.6494	0.926117	0.000125838
database_2009_07_16_Traj1_L.mat	E2_12057.xls	3	0.0442586	34.3824	0.884635	0.000105118
database_2009_07_16_Traj1_L.mat	E2_12233.xls	3	0.0515097	28.2308	0.91032	0.000112122
database_2009_07_16_Traj1_L.mat	E2_12410.xls	3	0.0213381	13.3819	0.923341	0.000120519
database_2009_07_16_Traj1_L.mat	E2_12556.xls	3	0.0534935	28.8694	0.916435	0.000133656
database_2009_07_16_Traj1_L.mat	E2_12795.xls	3	0.0483638	27.3177	0.847771	0.000194745
database_2009_07_16_Traj1_L.mat	E2_13051.xls	3	0.24071	1.72818	1.09171	0.000273388
database_2009_07_16_Traj1_L.mat	E2_13642.xls	3	0.0361826	24.7134	0.808447	0.000176339
database_2009_07_16_Traj1_L.mat	E2_13977.xls	3	0.0643164	37.6858	0.859346	0.000238225
database_2009_07_16_Traj1_L.mat	E2_14316.xls	3	0.0602479	37.5488	0.888086	0.000419514
database_2009_07_16_Traj1_L.mat	E2_14577.xls	3	0.960676	0.249188	2.15165	0.000207212
database_2009_07_16_Traj1_L.mat	E2_14747.xls	3	0.0509412	34.2919	0.89208	0.000177534
database_2009_07_16_Traj1_L.mat	E2_15000.xls	3	0.0357776	25.508	0.949807	0.000104788
database_2009_07_16_Traj1_L.mat	E1_13313.xls	4	0.0294015	15.186	1.01077	0.000173949
database_2009_07_16_Traj1_L.mat	E1_13642.xls	4	0.0457879	18.7666	0.970922	0.000196994
database_2009_07_16_Traj1_L.mat	E1_15000.xls	4	0.0398063	14.6848	0.902003	0.000125838
database_2009_07_16_Traj1_L.mat	E2_12233.xls	4	0.0172915	18.7161	0.943526	0.000112122
database_2009_07_16_Traj1_L.mat	E2_12410.xls	4	0.0211563	18.7694	1.05467	0.000120519
database_2009_07_16_Traj1_L.mat	E2_12556.xls	4	0.0341334	19.4239	0.933587	0.000133656
database_2009_07_16_Traj1_L.mat	E2_12795.xls	4	0.0427682	24.4081	0.872145	0.000194745
database_2009_07_16_Traj1_L.mat	E2_13051.xls	4	0.0248302	26.9869	0.933432	0.000273388
database_2009_07_16_Traj1_L.mat	E2_13642.xls	4	0.0269312	16.4756	1.15599	0.000176339
database_2009_07_16_Traj1_L.mat	E2_15000.xls	4	0.0253014	19.0999	0.980827	0.000104788
database_2009_07_16_Traj1_L.mat	E1_15000.xls	5	0.920661	0.155559	1.27869	0.000125838
database_2009_07_16_Traj1_L.mat	E2_12410.xls	5	0.999995	0.868953	1.10244	0.000120519
database_2009_07_16_Traj1_L.mat	E2_13051.xls	5	0.0398753	16.5863	0.982895	0.000273388
database_2009_07_16_Traj2_R.mat	E1_12318.xls	1	0.0262074	22.4657	0.922171	9.66184e-05
database_2009_07_16_Traj2_R.mat	E1_12496.xls	1	0.0677863	23.3416	0.88003	0.000121575
database_2009_07_16_Traj2_R.mat	E1_12741.xls	1	0.0385221	20.242	0.925445	0.000101518
database_2009_07_16_Traj2_R.mat	E1_12910.xls	1	0.0596279	26.8389	1.12393	0.000158263
database_2009_07_16_Traj2_R.mat	E1_13163.xls	1	0.12235	26.5804	1.1612	0.000176007
database_2009_07_16_Traj2_R.mat	E1_13406.xls	1	0.0914126	63.703	0.894934	0.000429742
database_2009_07_16_Traj2_R.mat	E1_13728.xls	1	0.120972	52.9083	0.933982	0.000691289
database_2009_07_16_Traj2_R.mat	E1_14097.xls	1	0.568168	13.8959	3.61223	0.000238943
database_2009_07_16_Traj2_R.mat	E1_14343.xls	1	0.0327316	15.5993	0.938131	0.000174952
database_2009_07_16_Traj2_R.mat	E1_14679.xls	1	0.0826011	48.9522	0.913932	0.000376762
database_2009_07_16_Traj2_R.mat	E1_15000.xls	1	0.0457243	25.1179	1.02711	0.000108866
database_2009_07_16_Traj2_R.mat	E2_10237.xls	1	0.0693276	42.7516	0.921147	0.000123978
database_2009_07_16_Traj2_R.mat	E2_10412.xls	1	0.0431657	33.721	0.862017	0.000106856
database_2009_07_16_Traj2_R.mat	E2_10558.xls	1	0.0708813	34.1442	0.882691	0.000140101
database_2009_07_16_Traj2_R.mat	E2_10735.xls	1	0.104629	20.715	0.979699	0.000240106
database_2009_07_16_Traj2_R.mat	E2_10910.xls	1	0.150891	45.9873	0.89573	0.000120622
database_2009_07_16_Traj2_R.mat	E2_11255.xls	1	0.0398492	28.4826	0.956983	0.000235352
database_2009_07_16_Traj2_R.mat	E2_11433.xls	1	0.0745557	33.5857	0.972932	0.000229523
database_2009_07_16_Traj2_R.mat	E2_11607.xls	1	0.608617	9.95815	3.26201	0.000664146
database_2009_07_16_Traj2_R.mat	E2_11798.xls	1	0.131027	78.5999	0.846115	0.000443288
database_2009_07_16_Traj2_R.mat	E2_11990.xls	1	0.110322	52.0482	0.92239	0.00213666
database_2009_07_16_Traj2_R.mat	E2_12140.xls	1	0.0386375	26.9787	0.985026	0.000239626
database_2009_07_16_Traj2_R.mat	E2_12496.xls	1	0.119925	68.7705	0.899823	0.00052156
database_2009_07_16_Traj2_R.mat	E2_12741.xls	1	0.0706469	22.2936	0.864341	0.000163164
database_2009_07_16_Traj2_R.mat	E2_12910.xls	1	0.105226	63.451	0.912649	0.000276569
database_2009_07_16_Traj2_R.mat	E2_13163.xls	1	0.0586464	31.425	0.852858	0.000184519
database_2009_07_16_Traj2_R.mat	E2_14097.xls	1	0.0669962	41.3425	0.935312	0.000475474
database_2009_07_16_Traj2_R.mat	E2_14343.xls	1	0.0389202	25.8763	0.970421	0.000147941
database_2009_07_16_Traj2_R.mat	E2_14679.xls	1	0.0497637	36.258	0.919678	0.000512285
database_2009_07_16_Traj2_R.mat	E1_12318.xls	2	0.0454598	20.2432	0.852105	9.66184e-05
database_2009_07_16_Traj2_R.mat	E1_12496.xls	2	0.0621865	29.423	0.968676	0.000121575
database_2009_07_16_Traj2_R.mat	E1_12741.xls	2	0.0140389	13.677	0.916391	0.000101518
database_2009_07_16_Traj2_R.mat	E1_12910.xls	2	0.0539706	27.2301	0.914644	0.000158263
database_2009_07_16_Traj2_R.mat	E1_13163.xls	2	0.0844111	29.7559	0.902747	0.000176007
database_2009_07_16_Traj2_R.mat	E1_13406.xls	2	0.777821	2.15661	1.94159	0.000429742
database_2009_07_16_Traj2_R.mat	E1_13728.xls	2	0.882168	9.5373	0.896539	0.000691289
database_2009_07_16_Traj2_R.mat	E1_14097.xls	2	0.084951	63.021	0.864941	0.000238943
database_2009_07_16_Traj2_R.mat	E1_14343.xls	2	0.0349179	21.9752	0.958554	0.000174952
database_2009_07_16_Traj2_R.mat	E1_14679.xls	2	0.619454	50.7247	0.815482	0.000376762
database_2009_07_16_Traj2_R.mat	E1_15000.xls	2	0.048574	25.6035	0.912684	0.000108866
database_2009_07_16_Traj2_R.mat	E2_10237.xls	2	0.14211	28.2909	1.03397	0.000123978
database_2009_07_16_Traj2_R.mat	E2_10412.xls	2	0.0998104	21.5172	0.923108	0.000106856
database_2009_07_16_Traj2_R.mat	E2_10558.xls	2	0.0359715	20.1802	1.06426	0.000140101
database_2009_07_16_Traj2_R.mat	E2_10735.xls	2	0.054152	26.4857	0.930833	0.000240106
database_2009_07_16_Traj2_R.mat	E2_10910.xls	2	0.0829407	51.8036	0.881937	0.000120622
database_2009_07_16_Traj2_R.mat	E2_11255.xls	2	0.0501463	22.6081	0.96803	0.000235352
database_2009_07_16_Traj2_R.mat	E2_11433.xls	2	0.0478498	16.6042	1.10071	0.000229523
database_2009_07_16_Traj2_R.mat	E2_11607.xls	2	0.120002	69.0583	0.834895	0.000664146
database_2009_07_16_Traj2_R.mat	E2_11798.xls	2	0.462909	7.78997	2.98532	0.000443288
database_2009_07_16_Traj2_R.mat	E2_11990.xls	2	0.0523953	41.649	0.877429	0.00213666
database_2009_07_16_Traj2_R.mat	E2_12140.xls	2	0.0565762	21.9594	1.01628	0.000239626
database_2009_07_16_Traj2_R.mat	E2_12496.xls	2	0.364573	28.8854	1.16138	0.00052156
database_2009_07_16_Traj2_R.mat	E2_12741.xls	2	0.0663482	27.2174	1.00915	0.000163164
database_2009_07_16_Traj2_R.mat	E2_12910.xls	2	0.534204	29.1045	2.19023	0.000276569
database_2009_07_16_Traj2_R.mat	E2_13163.xls	2	0.064151	22.0093	0.944032	0.000184519
database_2009_07_16_Traj2_R.mat	E2_14097.xls	2	0.847988	3.03341	1.6168	0.000475474
database_2009_07_16_Traj2_R.mat	E2_14343.xls	2	0.0505582	25.0716	0.939951	0.000147941
database_2009_07_16_Traj2_R.mat	E2_14679.xls	2	0.0966164	33.7817	0.979972	0.000512285
database_2009_07_16_Traj2_R.mat	E1_12318.xls	3	0.0589971	16.2786	0.91171	9.66184e-05
database_2009_07_16_Traj2_R.mat	E1_12496.xls	3	0.0403438	24.0571	1.00351	0.000121575
database_2009_07_16_Traj2_R.mat	E1_12741.xls	3	0.0522018	16.4124	0.938859	0.000101518
database_2009_07_16_Traj2_R.mat	E1_12910.xls	3	0.0456821	28.3256	1.08653	0.000158263
database_2009_07_16_Traj2_R.mat	E1_13163.xls	3	0.0338873	25.5218	1.01194	0.000176007
database_2009_07_16_Traj2_R.mat	E1_14343.xls	3	0.62015	5.57117	2.82168	0.000174952
database_2009_07_16_Traj2_R.mat	E1_15000.xls	3	0.0631277	26.089	0.883323	0.000108866
database_2009_07_16_Traj2_R.mat	E2_10237.xls	3	0.0571582	38.9263	0.909075	0.000123978
database_2009_07_16_Traj2_R.mat	E2_10412.xls	3	0.0387584	28.9037	0.977508	0.000106856
database_2009_07_16_Traj2_R.mat	E2_10558.xls	3	0.0526764	30.991	0.882284	0.000140101
database_2009_07_16_Traj2_R.mat	E2_10735.xls	3	0.734432	1.86435	2.31435	0.000240106
database_2009_07_16_Traj2_R.mat	E2_10910.xls	3	0.699704	0.697953	1.2759	0.000120622
database_2009_07_16_Traj2_R.mat	E2_11255.xls	3	0.367372	5.14022	1.39627	0.000235352
database_2009_07_16_Traj2_R.mat	E2_11433.xls	3	0.0406444	27.9252	0.96544	0.000229523
database_2009_07_16_Traj2_R.mat	E2_12140.xls	3	0.153252	2.35279	1.30037	0.000239626
database_2009_07_16_Traj2_R.mat	E2_12741.xls	3	0.27925	11.7623	2.5313	0.000163164
database_2009_07_16_Traj2_R.mat	E2_13163.xls	3	0.0560092	25.5402	0.891093	0.000184519
database_2009_07_16_Traj2_R.mat	E2_14097.xls	3	0.0582734	44.3025	0.941078	0.000475474
database_2009_07_16_Traj2_R.mat	E2_14343.xls	3	0.0631677	27.0525	0.939544	0.000147941
database_2009_07_16_Traj2_R.mat	E2_14679.xls	3	0.0517149	36.2058	0.896765	0.000512285
database_2009_07_16_Traj2_R.mat	E1_12318.xls	4	0.0227024	15.4377	1.03286	9.66184e-05
database_2009_07_16_Traj2_R.mat	E1_12741.xls	4	0.055405	18.1904	1.01192	0.000101518
database_2009_07_16_Traj2_R.mat	E1_14343.xls	4	0.0214051	18.2611	0.934187	0.000174952
database_2009_07_16_Traj2_R.mat	E2_10412.xls	4	0.0190683	20.072	1.0183	0.000106856
database_2009_07_16_Traj2_R.mat	E2_10558.xls	4	0.0201468	23.4235	0.948596	0.000140101
database_2009_07_16_Traj2_R.mat	E2_10735.xls	4	0.0330327	27.4326	0.916763	0.000240106
database_2009_07_16_Traj2_R.mat	E2_11255.xls	4	0.0777271	17.9574	0.969201	0.000235352
database_2009_07_16_Traj2_R.mat	E2_11433.xls	4	0.036981	20.9753	0.977117	0.000229523
database_2009_07_16_Traj2_R.mat	E2_12140.xls	4	0.0906093	25.4101	0.855141	0.000239626
database_2009_07_16_Traj2_R.mat	E2_12741.xls	4	0.0445268	22.9775	1.06509	0.000163164
database_2009_07_16_Traj2_R.mat	E2_13163.xls	4	0.0430728	22.127	1.23575	0.000184519
database_2009_07_16_Traj2_R.mat	E2_14343.xls	4	0.0584755	25.5049	0.914761	0.000147941
database_2009_07_16_Traj2_R.mat	E1_12741.xls	5	0.014026	12.3093	1.11573	0.000101518
database_2009_07_16_Traj2_R.mat	E1_14343.xls	5	0.0127049	16.2183	0.9993	0.000174952
database_2009_07_16_Traj2_R.mat	E2_10558.xls	5	0.402225	0.18018	1.27834	0.000140101
database_2009_07_16_Traj2_R.mat	E2_10735.xls	5	0.0159228	18.4068	0.976734	0.000240106
database_2009_07_16_Traj2_R.mat	E2_11255.xls	5	0.0368153	19.6486	0.903281	0.000235352
database_2009_07_16_Traj2_R.mat	E2_11433.xls	5	0.437253	0.220131	0.826901	0.000229523
database_2009_07_16_Traj2_R.mat	E2_12140.xls	5	0.0362087	15.7637	0.986669	0.000239626
database_2009_07_16_Traj2_R.mat	E2_12741.xls	5	0.0169087	16.4125	1.15115	0.000163164
database_2012_11_14_Traj1_R.mat	E1_12807.xls	1	0.310078	51.2508	0.8526	0.000131945
database_2012_11_14_Traj1_R.mat	E1_12955.xls	1	0.326699	34.9279	0.874614	0.000479118
database_2012_11_14_Traj1_R.mat	E1_13134.xls	1	0.531367	28.7216	0.837793	0.000177524
database_2012_11_14_Traj1_R.mat	E1_13311.xls	1	0.0500288	28.3544	0.967054	0.00012677
database_2012_11_14_Traj1_R.mat	E1_13641.xls	1	0.698014	20.2187	2.45841	0.000149534
database_2012_11_14_Traj1_R.mat	E1_13974.xls	1	0.0840628	39.8501	0.91155	0.000624221
database_2012_11_14_Traj1_R.mat	E1_14221.xls	1	0.0273369	21.2306	0.98647	0.000111868
database_2012_11_14_Traj1_R.mat	E1_14483.xls	1	0.0582431	20.5423	0.977934	0.00100914
database_2012_11_14_Traj1_R.mat	E1_14743.xls	1	0.0166852	20.0925	1.00676	0.000107358
database_2012_11_14_Traj1_R.mat	E1_15000.xls	1	0.0257731	19.5912	0.939295	9.55334e-05
database_2012_11_14_Traj1_R.mat	E1_12807.xls	2	0.0720014	45.8583	0.913626	0.000131945
database_2012_11_14_Traj1_R.mat	E1_12955.xls	2	0.0863285	42.5079	0.938964	0.000479118
database_2012_11_14_Traj1_R.mat	E1_13134.xls	2	0.0868054	60.2546	0.924411	0.000177524
database_2012_11_14_Traj1_R.mat	E1_13311.xls	2	0.0685328	21.0784	1.06882	0.00012677
database_2012_11_14_Traj1_R.mat	E1_13641.xls	2	0.106678	60.2558	0.905012	0.000149534
database_2012_11_14_Traj1_R.mat	E1_13974.xls	2	0.0710019	35.3814	0.981455	0.000624221
database_2012_11_14_Traj1_R.mat	E1_14221.xls	2	0.039328	17.6369	1.02423	0.000111868
database_2012_11_14_Traj1_R.mat	E1_14483.xls	2	0.0332959	15.4067	1.0277	0.00100914
database_2012_11_14_Traj1_R.mat	E1_14743.xls	2	0.0563555	19.4443	0.936414	0.000107358
database_2012_11_14_Traj1_R.mat	E1_15000.xls	2	0.030343	15.2376	1.16325	9.55334e-05
database_2012_11_14_Traj1_R.mat	E1_13311.xls	3	0.0639454	28.5087	0.977866	0.00012677
database_2012_11_14_Traj1_R.mat	E1_14221.xls	3	0.0411296	24.852	0.973446	0.000111868
database_2012_11_14_Traj1_R.mat	E1_14483.xls	3	0.0426231	17.4537	0.967564	0.00100914
database_2012_11_14_Traj1_R.mat	E1_14743.xls	3	0.0504078	21.0647	0.932189	0.000107358
database_2012_11_14_Traj1_R.mat	E1_15000.xls	3	0.0340915	26.1217	0.976881	9.55334e-05
database_2012_11_14_Traj1_R.mat	E1_14221.xls	4	0.0300315	16.5311	0.951068	0.000111868
database_2012_11_14_Traj1_R.mat	E1_14483.xls	4	0.0277588	20.8655	0.945806	0.00100914
database_2012_11_14_Traj1_R.mat	E1_14743.xls	4	0.0340385	19.2823	0.95899	0.000107358
database_2012_11_14_Traj1_R.mat	E1_15000.xls	4	0.0401959	15.4795	0.751349	9.55334e-05
database_2012_11_14_Traj2_L.mat	E1_07940.xls	1	0.0456264	23.6915	0.94715	9.33104e-05
database_2012_11_14_Traj2_L.mat	E1_08132.xls	1	0.0290474	18.9515	1.07432	0.000113541
database_2012_11_14_Traj2_L.mat	E1_08324.xls	1	0.0577802	28.0068	0.928353	0.000168648
database_2012_11_14_Traj2_L.mat	E1_08524.xls	1	0.0431795	19.8833	0.957026	9.81719e-05
database_2012_11_14_Traj2_L.mat	E1_08702.xls	1	0.0363038	24.1508	1.03907	0.000147907
database_2012_11_14_Traj2_L.mat	E1_08846.xls	1	0.0268864	20.4417	1.016	0.000108171
database_2012_11_14_Traj2_L.mat	E1_09022.xls	1	0.0457278	22.5622	0.924338	9.64105e-05
database_2012_11_14_Traj2_L.mat	E1_09199.xls	1	0.0493095	27.9141	1.03308	0.000119008
database_2012_11_14_Traj2_L.mat	E1_09375.xls	1	0.0727463	33.493	0.938156	0.000100055
database_2012_11_14_Traj2_L.mat	E1_09567.xls	1	0.0861883	37.2852	0.926071	0.000101455
database_2012_11_14_Traj2_L.mat	E1_09745.xls	1	0.0257539	22.7754	0.996923	9.95437e-05
database_2012_11_14_Traj2_L.mat	E1_09918.xls	1	0.0446327	19.9491	1.09488	9.94173e-05
database_2012_11_14_Traj2_L.mat	E1_10096.xls	1	0.0378151	24.23	0.934296	0.000105621
database_2012_11_14_Traj2_L.mat	E1_10314.xls	1	0.0685043	34.1955	0.952918	9.98433e-05
database_2012_11_14_Traj2_L.mat	E1_10643.xls	1	0.055725	21.6923	0.979607	9.45503e-05
database_2012_11_14_Traj2_L.mat	E1_10895.xls	1	0.0490021	23.9209	1.00212	0.000106873
database_2012_11_14_Traj2_L.mat	E1_11149.xls	1	0.0454805	20.5267	0.992092	9.33303e-05
database_2012_11_14_Traj2_L.mat	E1_11401.xls	1	0.0405043	23.144	0.992487	9.66247e-05
database_2012_11_14_Traj2_L.mat	E1_11729.xls	1	0	0.166204	1.40951	0.000249679
database_2012_11_14_Traj2_L.mat	E1_11973.xls	1	0.0592398	24.2148	0.922686	8.92416e-05
database_2012_11_14_Traj2_L.mat	E1_12221.xls	1	0.0394287	23.8941	0.951635	7.27779e-05
database_2012_11_14_Traj2_L.mat	E1_12544.xls	1	0.0305736	22.1229	0.961498	9.64821e-05
database_2012_11_14_Traj2_L.mat	E1_12791.xls	1	0.051442	27.6329	0.890641	0.000176824
database_2012_11_14_Traj2_L.mat	E1_13126.xls	1	0.0769369	59.1555	0.970416	0.000298073
database_2012_11_14_Traj2_L.mat	E1_13455.xls	1	0.0382756	20.1678	1.09791	0.000106787
database_2012_11_14_Traj2_L.mat	E1_13790.xls	1	0.0296082	18.4648	1.06337	0.000167752
database_2012_11_14_Traj2_L.mat	E1_14122.xls	1	0.0399675	21.1724	0.920705	0.000101418
database_2012_11_14_Traj2_L.mat	E1_14489.xls	1	0.0611354	18.98	0.890345	0.000169219
database_2012_11_14_Traj2_L.mat	E1_14826.xls	1	0.0880466	19.4735	0.952911	0.000142927
database_2012_11_14_Traj2_L.mat	E1_15000.xls	1	0.867459	1.84268	1.26846	0.000271449
database_2012_11_14_Traj2_L.mat	E2_13790.xls	1	0.0341769	29.3674	0.942625	0.000200223
database_2012_11_14_Traj2_L.mat	E2_14122.xls	1	0.0357486	23.9301	0.973054	8.65839e-05
database_2012_11_14_Traj2_L.mat	E2_14489.xls	1	0.0839224	52.8407	0.947462	0.00152309
database_2012_11_14_Traj2_L.mat	E2_14826.xls	1	0.0557269	28.0378	0.979051	0.000101771
database_2012_11_14_Traj2_L.mat	E2_15000.xls	1	0.823691	3.21529	5.38537	0.000276081
database_2012_11_14_Traj2_L.mat	E1_07940.xls	2	0.0305948	20.5787	0.910725	9.33104e-05
database_2012_11_14_Traj2_L.mat	E1_08132.xls	2	0.0677805	18.8625	0.90683	0.000113541
database_2012_11_14_Traj2_L.mat	E1_08324.xls	2	0.111164	19.296	1.06745	0.000168648
database_2012_11_14_Traj2_L.mat	E1_08524.xls	2	0.033905	21.5813	0.951603	9.81719e-05
database_2012_11_14_Traj2_L.mat	E1_08702.xls	2	0.0415311	27.2367	0.923151	0.000147907
database_2012_11_14_Traj2_L.mat	E1_08846.xls	2	0.0445194	22.5669	1.05181	0.000108171
database_2012_11_14_Traj2_L.mat	E1_09022.xls	2	0.0615085	18.2918	0.966986	9.64105e-05
database_2012_11_14_Traj2_L.mat	E1_09199.xls	2	0.0425942	23.4744	0.97849	0.000119008
database_2012_11_14_Traj2_L.mat	E1_09375.xls	2	0.0556878	35.1492	0.927966	0.000100055
database_2012_11_14_Traj2_L.mat	E1_09567.xls	2	0.0440172	37.8179	0.969341	0.000101455
database_2012_11_14_Traj2_L.mat	E1_09745.xls	2	0.0624421	14.5644	1.01259	9.95437e-05
database_2012_11_14_Traj2_L.mat	E1_09918.xls	2	0.0532063	21.1037	0.922245	9.94173e-05
database_2012_11_14_Traj2_L.mat	E1_10096.xls	2	0.0651232	18.5067	1.02304	0.000105621
database_2012_11_14_Traj2_L.mat	E1_10314.xls	2	0.0429293	37.4985	0.991526	9.98433e-05
database_2012_11_14_Traj2_L.mat	E1_10643.xls	2	0.0521276	19.9957	1.00162	9.45503e-05
database_2012_11_14_Traj2_L.mat	E1_10895.xls	2	0.0378972	17.1041	0.917092	0.000106873
database_2012_11_14_Traj2_L.mat	E1_11149.xls	2	0.0300394	16.2775	0.993608	9.33303e-05
database_2012_11_14_Traj2_L.mat	E1_11401.xls	2	0.0503624	16.8052	0.871005	9.66247e-05
database_2012_11_14_Traj2_L.mat	E1_11729.xls	2	0.0588986	22.493	0.970479	0.000249679
database_2012_11_14_Traj2_L.mat	E1_11973.xls	2	0.0659128	22.5059	0.927552	8.92416e-05
database_2012_11_14_Traj2_L.mat	E1_12221.xls	2	0.0385362	16.9007	0.955221	7.27779e-05
database_2012_11_14_Traj2_L.mat	E1_12544.xls	2	0.0406592	22.9624	0.996427	9.64821e-05
database_2012_11_14_Traj2_L.mat	E1_12791.xls	2	0.0581589	20.386	0.968815	0.000176824
database_2012_11_14_Traj2_L.mat	E1_13126.xls	2	0.288703	21.5581	0.946728	0.000298073
database_2012_11_14_Traj2_L.mat	E1_13455.xls	2	0.0431095	30.3287	0.966007	0.000106787
database_2012_11_14_Traj2_L.mat	E1_13790.xls	2	0.0515116	15.3428	0.919473	0.000167752
database_2012_11_14_Traj2_L.mat	E1_14122.xls	2	0.0409287	12.0918	0.909429	0.000101418
database_2012_11_14_Traj2_L.mat	E1_14489.xls	2	0.031585	15.5878	1.1339	0.000169219
database_2012_11_14_Traj2_L.mat	E1_14826.xls	2	0.0543154	14.3084	1.01423	0.000142927
database_2012_11_14_Traj2_L.mat	E1_15000.xls	2	0.084492	65.0035	0.928382	0.000271449
database_2012_11_14_Traj2_L.mat	E2_13790.xls	2	0.0499222	29.6793	1.00429	0.000200223
database_2012_11_14_Traj2_L.mat	E2_14122.xls	2	0.0449724	23.9301	0.917904	8.65839e-05
database_2012_11_14_Traj2_L.mat	E2_14489.xls	2	0.851253	7.27165	1.84207	0.00152309
database_2012_11_14_Traj2_L.mat	E2_14826.xls	2	0.0670405	29.8022	0.895728	0.000101771
database_2012_11_14_Traj2_L.mat	E2_15000.xls	2	0.108798	77.6963	0.901942	0.000276081
database_2012_11_14_Traj2_L.mat	E1_07940.xls	3	0.0357699	23.8644	0.972164	9.33104e-05
database_2012_11_14_Traj2_L.mat	E1_08132.xls	3	0.068715	21.1758	0.966321	0.000113541
database_2012_11_14_Traj2_L.mat	E1_08324.xls	3	0.437561	10.5026	1.3273	0.000168648
database_2012_11_14_Traj2_L.mat	E1_08524.xls	3	0.0530046	17.6375	0.96185	9.81719e-05
database_2012_11_14_Traj2_L.mat	E1_08702.xls	3	0.02443	22.3395	0.99703	0.000147907
database_2012_11_14_Traj2_L.mat	E1_08846.xls	3	0.0542396	18.2491	1.04886	0.000108171
database_2012_11_14_Traj2_L.mat	E1_09022.xls	3	0.0327528	19.9288	0.977372	9.64105e-05
database_2012_11_14_Traj2_L.mat	E1_09199.xls	3	0.0330809	24.6481	1.06469	0.000119008
database_2012_11_14_Traj2_L.mat	E1_09567.xls	3	0.567036	0.213058	0.69873	0.000101455
database_2012_11_14_Traj2_L.mat	E1_09745.xls	3	0.0460855	19.0872	1.03502	9.95437e-05
database_2012_11_14_Traj2_L.mat	E1_09918.xls	3	0.019269	16.4211	0.885856	9.94173e-05
database_2012_11_14_Traj2_L.mat	E1_10096.xls	3	0.0299418	16.3135	1.02841	0.000105621
database_2012_11_14_Traj2_L.mat	E1_10314.xls	3	0	0.647642	2.10751	9.98433e-05
database_2012_11_14_Traj2_L.mat	E1_10643.xls	3	0.0233658	13.2093	0.894594	9.45503e-05
database_2012_11_14_Traj2_L.mat	E1_10895.xls	3	0.0344088	18.5914	0.996549	0.000106873
database_2012_11_14_Traj2_L.mat	E1_11149.xls	3	0.0612962	17.5196	0.865889	9.33303e-05
database_2012_11_14_Traj2_L.mat	E1_11401.xls	3	0.136959	4.96294	0.964076	9.66247e-05
database_2012_11_14_Traj2_L.mat	E1_11729.xls	3	0.04249	26.4819	1.07104	0.000249679
database_2012_11_14_Traj2_L.mat	E1_11973.xls	3	0.0327741	23.5377	0.976531	8.92416e-05
database_2012_11_14_Traj2_L.mat	E1_12221.xls	3	0.0345746	21.563	1.14564	7.27779e-05
database_2012_11_14_Traj2_L.mat	E1_12544.xls	3	0.0617521	23.6867	0.918706	9.64821e-05
database_2012_11_14_Traj2_L.mat	E1_12791.xls	3	0.0320948	25.6349	1.04645	0.000176824
database_2012_11_14_Traj2_L.mat	E1_13455.xls	3	0.025298	20.6296	1.01495	0.000106787
database_2012_11_14_Traj2_L.mat	E1_13790.xls	3	0.0524305	22.1667	0.924861	0.000167752
database_2012_11_14_Traj2_L.mat	E1_14122.xls	3	0.0315243	20.5608	0.93005	0.000101418
database_2012_11_14_Traj2_L.mat	E1_14489.xls	3	0.668819	1.53455	1.24363	0.000169219
database_2012_11_14_Traj2_L.mat	E1_14826.xls	3	0.702438	0.898282	1.84137	0.000142927
database_2012_11_14_Traj2_L.mat	E2_13790.xls	3	0.0344779	26.649	0.963583	0.000200223
database_2012_11_14_Traj2_L.mat	E2_14122.xls	3	0.0346894	18.7586	0.960366	8.65839e-05
database_2012_11_14_Traj2_L.mat	E2_14826.xls	3	0.0616178	27.9737	0.931022	0.000101771
database_2012_11_14_Traj2_L.mat	E1_08132.xls	4	0.0236312	19.0404	0.950166	0.000113541
database_2012_11_14_Traj2_L.mat	E1_08324.xls	4	0.023857	23.7893	0.971487	0.000168648
database_2012_11_14_Traj2_L.mat	E1_08524.xls	4	0.0186815	17.2541	0.989931	9.81719e-05
database_2012_11_14_Traj2_L.mat	E1_08702.xls	4	2.2634e-06	1.52061	3.16318	0.000147907
database_2012_11_14_Traj2_L.mat	E1_08846.xls	4	0.0189299	16.4276	1.09559	0.000108171
database_2012_11_14_Traj2_L.mat	E1_09022.xls	4	0.0162379	17.0818	1.18865	9.64105e-05
database_2012_11_14_Traj2_L.mat	E1_09745.xls	4	0.0249698	18.1719	0.970844	9.95437e-05
database_2012_11_14_Traj2_L.mat	E1_09918.xls	4	0.0305964	16.2287	1.00525	9.94173e-05
database_2012_11_14_Traj2_L.mat	E1_10096.xls	4	0.0723599	19.2378	1.07238	0.000105621
database_2012_11_14_Traj2_L.mat	E1_10643.xls	4	0.0661388	16.4813	0.97208	9.45503e-05
database_2012_11_14_Traj2_L.mat	E1_10895.xls	4	0.0369297	19.5829	0.866833	0.000106873
database_2012_11_14_Traj2_L.mat	E1_11149.xls	4	0.0320304	19.2846	1.05937	9.33303e-05
database_2012_11_14_Traj2_L.mat	E1_11401.xls	4	0.0148907	14.4957	1.0598	9.66247e-05
database_2012_11_14_Traj2_L.mat	E1_11729.xls	4	0.0442772	23.324	1.11798	0.000249679
database_2012_11_14_Traj2_L.mat	E1_12221.xls	4	0.0143206	12.2385	1.0171	7.27779e-05
database_2012_11_14_Traj2_L.mat	E1_13790.xls	4	0.0281201	13.1127	1.09436	0.000167752
database_2012_11_14_Traj2_L.mat	E1_14122.xls	4	0.0413397	16.2322	0.999822	0.000101418
database_2012_11_14_Traj2_L.mat	E1_14489.xls	4	0.0358398	15.9917	0.910474	0.000169219
database_2012_11_14_Traj2_L.mat	E1_14826.xls	4	0.0667694	15.2066	0.986136	0.000142927
database_2012_11_14_Traj2_L.mat	E2_14122.xls	4	0.0243045	17.6302	0.998157	8.65839e-05
database_2012_11_14_Traj2_L.mat	E1_09745.xls	5	0.811535	0.430741	0.878483	9.95437e-05
database_2012_11_14_Traj2_L.mat	E1_10096.xls	5	0.584333	0.417759	0.869345	0.000105621
database_2012_11_14_Traj2_L.mat	E1_11401.xls	5	0.0350842	18.6724	1.07293	9.66247e-05
database_2012_11_14_Traj2_L.mat	E1_14489.xls	5	0.0281658	20.2723	1.06507	0.000169219
database_2012_11_14_Traj2_L.mat	E1_14826.xls	5	0.0291536	21.2059	1.06895	0.000142927
database_2014_04_22_Traj1_R.mat	E1_10642.xls	1	0.0223056	21.454	1.04308	0.000102157
database_2014_04_22_Traj1_R.mat	E1_10798.xls	1	0.0193208	21.4621	1.02189	0.000113332
database_2014_04_22_Traj1_R.mat	E1_10961.xls	1	0.0211536	21.2898	1.05962	0.000113271
database_2014_04_22_Traj1_R.mat	E1_11206.xls	1	0.0227039	20.3936	1.09217	0.00011145
database_2014_04_22_Traj1_R.mat	E1_11455.xls	1	0.0372503	23.2951	1.22673	0.000108727
database_2014_04_22_Traj1_R.mat	E1_11613.xls	1	0.0439184	24.7677	1.24984	0.000151337
database_2014_04_22_Traj1_R.mat	E1_11780.xls	1	0.0519748	23.568	1.02971	0.000143418
database_2014_04_22_Traj1_R.mat	E1_11944.xls	1	0.0885659	29.9459	1.04075	0.000190182
database_2014_04_22_Traj1_R.mat	E1_12195.xls	1	0.0614185	28.3334	0.918157	0.000109509
database_2014_04_22_Traj1_R.mat	E1_12518.xls	1	0.0731766	37.3078	0.907872	0.000161968
database_2014_04_22_Traj1_R.mat	E1_12762.xls	1	0.0416784	22.0658	1.02454	0.000105192
database_2014_04_22_Traj1_R.mat	E1_12927.xls	1	0.121585	67.8182	0.864949	0.000556109
database_2014_04_22_Traj1_R.mat	E1_13179.xls	1	0.0407117	31.5424	1.14402	0.00015284
database_2014_04_22_Traj1_R.mat	E1_13346.xls	1	0.104653	39.9527	0.98605	0.000431381
database_2014_04_22_Traj1_R.mat	E1_13594.xls	1	0.389109	30.2054	1.42869	0.000278257
database_2014_04_22_Traj1_R.mat	E1_13963.xls	1	0.0550768	24.077	0.981406	0.000231633
database_2014_04_22_Traj1_R.mat	E1_14331.xls	1	0.0444872	27.4665	1.11116	0.000488904
database_2014_04_22_Traj1_R.mat	E1_14668.xls	1	0.038579	22.4523	0.983064	9.73099e-05
database_2014_04_22_Traj1_R.mat	E1_15000.xls	1	0.0529716	21.7328	0.972759	0.000170248
database_2014_04_22_Traj1_R.mat	E2_11455.xls	1	0.073237	23.0342	1.09443	0.000278211
database_2014_04_22_Traj1_R.mat	E2_11613.xls	1	0.0650212	28.2744	1.24659	0.000213842
database_2014_04_22_Traj1_R.mat	E2_11780.xls	1	0.590645	24.3949	0.952671	0.000280856
database_2014_04_22_Traj1_R.mat	E2_12195.xls	1	0.641656	4.3714	1.81132	0.000656197
database_2014_04_22_Traj1_R.mat	E2_13179.xls	1	0.0738105	25.2845	1.12468	0.000361326
database_2014_04_22_Traj1_R.mat	E2_13594.xls	1	0.0554931	32.4083	1.02157	0.000132515
database_2014_04_22_Traj1_R.mat	E2_13963.xls	1	0.0618943	27.5967	1.08782	0.000206617
database_2014_04_22_Traj1_R.mat	E2_15000.xls	1	0.0446193	26.9822	1.07064	0.000117793
database_2014_04_22_Traj1_R.mat	E1_10642.xls	2	0.0397996	19.6835	0.924199	0.000102157
database_2014_04_22_Traj1_R.mat	E1_10798.xls	2	0.0220988	20.2945	0.994834	0.000113332
database_2014_04_22_Traj1_R.mat	E1_10961.xls	2	0.0197574	17.6646	0.971509	0.000113271
database_2014_04_22_Traj1_R.mat	E1_11206.xls	2	0.0226497	18.3331	0.936053	0.00011145
database_2014_04_22_Traj1_R.mat	E1_11455.xls	2	0.025436	20.2935	0.924182	0.000108727
database_2014_04_22_Traj1_R.mat	E1_11613.xls	2	0.0657012	19.7397	1.01768	0.000151337
database_2014_04_22_Traj1_R.mat	E1_11780.xls	2	0.021855	19.9918	0.955233	0.000143418
database_2014_04_22_Traj1_R.mat	E1_11944.xls	2	0.0465721	40.0542	0.951763	0.000190182
database_2014_04_22_Traj1_R.mat	E1_12195.xls	2	0.0621935	28.8697	1.0322	0.000109509
database_2014_04_22_Traj1_R.mat	E1_12518.xls	2	0.336474	13.1629	1.10353	0.000161968
database_2014_04_22_Traj1_R.mat	E1_12762.xls	2	0.0757165	14.0857	0.9734	0.000105192
database_2014_04_22_Traj1_R.mat	E1_12927.xls	2	0.829129	2.18653	0.342517	0.000556109
database_2014_04_22_Traj1_R.mat	E1_13179.xls	2	0.0704831	34.3522	0.984639	0.00015284
database_2014_04_22_Traj1_R.mat	E1_13346.xls	2	0.422226	27.3175	1.22351	0.000431381
database_2014_04_22_Traj1_R.mat	E1_13594.xls	2	0.0889499	54.5532	0.87114	0.000278257
database_2014_04_22_Traj1_R.mat	E1_13963.xls	2	0.0392575	27.7889	0.996216	0.000231633
database_2014_04_22_Traj1_R.mat	E1_14331.xls	2	0.048486	29.6513	0.922739	0.000488904
database_2014_04_22_Traj1_R.mat	E1_14668.xls	2	0.0225621	19.6458	1.06307	9.73099e-05
database_2014_04_22_Traj1_R.mat	E1_15000.xls	2	0.0348752	19.818	1.16641	0.000170248
database_2014_04_22_Traj1_R.mat	E2_11455.xls	2	0.0167068	16.3784	1.11148	0.000278211
database_2014_04_22_Traj1_R.mat	E2_11613.xls	2	0.0683302	39.9933	0.992417	0.000213842
database_2014_04_22_Traj1_R.mat	E2_11780.xls	2	0.121565	76.6759	0.916992	0.000280856
database_2014_04_22_Traj1_R.mat	E2_12195.xls	2	0.145046	67.8013	0.902218	0.000656197
database_2014_04_22_Traj1_R.mat	E2_13179.xls	2	0.157773	17.2188	2.84022	0.000361326
database_2014_04_22_Traj1_R.mat	E2_13594.xls	2	0.0838906	28.6039	1.00438	0.000132515
database_2014_04_22_Traj1_R.mat	E2_13963.xls	2	0.0849095	40.2411	0.985361	0.000206617
database_2014_04_22_Traj1_R.mat	E2_15000.xls	2	0.0520885	35.0816	1.0556	0.000117793
database_2014_04_22_Traj1_R.mat	E1_10642.xls	3	0.0475202	18.3296	0.93475	0.000102157
database_2014_04_22_Traj1_R.mat	E1_10798.xls	3	0.0350594	15.6796	0.945492	0.000113332
database_2014_04_22_Traj1_R.mat	E1_10961.xls	3	0.0472611	22.4906	0.988751	0.000113271
database_2014_04_22_Traj1_R.mat	E1_11206.xls	3	0.0202445	18.2803	0.999841	0.00011145
database_2014_04_22_Traj1_R.mat	E1_11455.xls	3	0.028984	17.2919	0.998363	0.000108727
database_2014_04_22_Traj1_R.mat	E1_11613.xls	3	0.0327855	15.6428	1.12393	0.000151337
database_2014_04_22_Traj1_R.mat	E1_11780.xls	3	0.0301114	18.0099	0.956191	0.000143418
database_2014_04_22_Traj1_R.mat	E1_12195.xls	3	0.0501851	29.2272	1.21507	0.000109509
database_2014_04_22_Traj1_R.mat	E1_12518.xls	3	0.0635446	34.7375	1.14963	0.000161968
database_2014_04_22_Traj1_R.mat	E1_12762.xls	3	0.0456507	24.6901	0.965035	0.000105192
database_2014_04_22_Traj1_R.mat	E1_13179.xls	3	0.106184	23.8381	0.936235	0.00015284
database_2014_04_22_Traj1_R.mat	E1_13346.xls	3	0.0397575	18.9881	1.11447	0.000431381
database_2014_04_22_Traj1_R.mat	E1_13963.xls	3	0.039963	26.4847	1.19008	0.000231633
database_2014_04_22_Traj1_R.mat	E1_14331.xls	3	0.0353616	22.3685	1.02981	0.000488904
database_2014_04_22_Traj1_R.mat	E1_14668.xls	3	0.0380551	28.5331	1.00905	9.73099e-05
database_2014_04_22_Traj1_R.mat	E1_15000.xls	3	0.0457144	19.9138	0.935611	0.000170248
database_2014_04_22_Traj1_R.mat	E2_11455.xls	3	0.416459	3.52364	0.641821	0.000278211
database_2014_04_22_Traj1_R.mat	E2_11613.xls	3	0.173299	16.5554	1.21433	0.000213842
database_2014_04_22_Traj1_R.mat	E2_13179.xls	3	0.0538835	29.0002	1.03743	0.000361326
database_2014_04_22_Traj1_R.mat	E2_13594.xls	3	0.0630399	37.1287	1.04744	0.000132515
database_2014_04_22_Traj1_R.mat	E2_13963.xls	3	0.0890589	19.1672	1.61976	0.000206617
database_2014_04_22_Traj1_R.mat	E2_15000.xls	3	0.0589872	31.8706	0.929351	0.000117793
database_2014_04_22_Traj1_R.mat	E1_10642.xls	4	0.0274062	18.5379	1.02981	0.000102157
database_2014_04_22_Traj1_R.mat	E1_10798.xls	4	0.0277451	16.5877	1.11988	0.000113332
database_2014_04_22_Traj1_R.mat	E1_10961.xls	4	0.0464341	19.7889	0.914624	0.000113271
database_2014_04_22_Traj1_R.mat	E1_11206.xls	4	0.0501561	18.3331	1.02711	0.00011145
database_2014_04_22_Traj1_R.mat	E1_11455.xls	4	0.05075	18.4012	1.01175	0.000108727
database_2014_04_22_Traj1_R.mat	E1_11613.xls	4	0.0173082	13.6874	1.02052	0.000151337
database_2014_04_22_Traj1_R.mat	E1_11780.xls	4	0.0313672	19.4317	1.07648	0.000143418
database_2014_04_22_Traj1_R.mat	E1_12762.xls	4	0.023367	20.4055	1.07566	0.000105192
database_2014_04_22_Traj1_R.mat	E1_14668.xls	4	0.0200715	17.0731	1.28394	9.73099e-05
database_2014_04_22_Traj1_R.mat	E1_15000.xls	4	0.0468588	20.7754	1.03647	0.000170248
database_2014_04_22_Traj1_R.mat	E2_11455.xls	4	0.0482155	17.3572	1.03806	0.000278211
database_2014_04_22_Traj1_R.mat	E2_13179.xls	4	0.0540107	21.9314	1.00617	0.000361326
database_2014_04_22_Traj1_R.mat	E2_11455.xls	5	0.0487836	27.0146	1.01264	0.000278211
database_2014_04_22_Traj1_R.mat	E2_13179.xls	5	0.675755	3.26252	0.789671	0.000361326
database_2014_04_22_Traj2_L.mat	E2_10661.xls	1	0.0563608	27.842	0.996191	0.000132224
database_2014_04_22_Traj2_L.mat	E2_10901.xls	1	0.0284139	25.1478	0.999124	0.000124202
database_2014_04_22_Traj2_L.mat	E2_11067.xls	1	0.0469698	22.6107	1.06397	0.00117043
database_2014_04_22_Traj2_L.mat	E2_11476.xls	1	0.0345162	21.7941	0.963884	0.000168687
database_2014_04_22_Traj2_L.mat	E2_11633.xls	1	0.12037	57.9927	0.933983	0.00033762
database_2014_04_22_Traj2_L.mat	E2_12251.xls	1	0.179264	25.6722	1.22633	0.000286801
database_2014_04_22_Traj2_L.mat	E2_12618.xls	1	0.271802	17.7067	2.37234	0.000315669
database_2014_04_22_Traj2_L.mat	E2_12940.xls	1	0.230228	41.8427	0.927294	0.000234714
database_2014_04_22_Traj2_L.mat	E2_14068.xls	1	0.53977	37.7622	1.0818	0.000445282
database_2014_04_22_Traj2_L.mat	E2_14401.xls	1	0.168851	61.1825	1.24634	0.00148598
database_2014_04_22_Traj2_L.mat	E2_14740.xls	1	0.0408368	28.3234	0.868688	0.000142309
database_2014_04_22_Traj2_L.mat	E2_15000.xls	1	0.0338116	26.3976	1.01056	0.000134136
database_2014_04_22_Traj2_L.mat	E2_10661.xls	2	0.0728122	28.2822	0.955631	0.000132224
database_2014_04_22_Traj2_L.mat	E2_10901.xls	2	0.068385	23.1754	0.963995	0.000124202
database_2014_04_22_Traj2_L.mat	E2_11067.xls	2	0.0461339	20.6273	0.992817	0.00117043
database_2014_04_22_Traj2_L.mat	E2_11476.xls	2	0.0710075	6.84232	1.69632	0.000168687
database_2014_04_22_Traj2_L.mat	E2_11633.xls	2	0.61645	26.6381	3.26295	0.00033762
database_2014_04_22_Traj2_L.mat	E2_12251.xls	2	0.0833787	57.6656	0.919517	0.000286801
database_2014_04_22_Traj2_L.mat	E2_12618.xls	2	0.120373	67.3599	0.89701	0.000315669
database_2014_04_22_Traj2_L.mat	E2_12940.xls	2	0.0595843	41.7602	1.07981	0.000234714
database_2014_04_22_Traj2_L.mat	E2_14068.xls	2	0.0996063	53.7282	0.914405	0.000445282
database_2014_04_22_Traj2_L.mat	E2_14401.xls	2	0.758904	4.85225	1.279	0.00148598
database_2014_04_22_Traj2_L.mat	E2_14740.xls	2	0.0462502	28.8824	1.0016	0.000142309
database_2014_04_22_Traj2_L.mat	E2_15000.xls	2	0.031412	25.9675	0.960854	0.000134136
database_2014_04_22_Traj2_L.mat	E2_10661.xls	3	0.0408487	25.8611	0.972579	0.000132224
database_2014_04_22_Traj2_L.mat	E2_10901.xls	3	0.0693859	24.9013	1.10332	0.000124202
database_2014_04_22_Traj2_L.mat	E2_11067.xls	3	0.0709974	23.404	0.93753	0.00117043
database_2014_04_22_Traj2_L.mat	E2_11476.xls	3	0.0457648	25.4686	1.00253	0.000168687
database_2014_04_22_Traj2_L.mat	E2_14740.xls	3	0.0725393	33.3545	1.07649	0.000142309
database_2014_04_22_Traj2_L.mat	E2_15000.xls	3	0.0582737	21.6127	1.01277	0.000134136
database_2014_04_22_Traj2_L.mat	E2_10901.xls	4	0.0309085	18.7376	1.5634	0.000124202
database_2014_04_22_Traj2_L.mat	E2_11476.xls	4	0.0311782	21.5406	1.12511	0.000168687
database_2014_04_22_Traj2_L.mat	E2_15000.xls	4	0.0317898	18.602	0.943602	0.000134136
database_2014_05_21_Traj1_R.mat	E1_RT1D10.325F0001.xls	1	0.0550669	41.3562	0.99307	0.000105476	6.09585e-08
database_2014_05_21_Traj1_R.mat	E1_RT1D11.771F0001.xls	1	0.0455448	48.3007	0.942542	4.51754e-05	5.7603e-07
database_2014_05_21_Traj1_R.mat	E1_RT1D11.964F0001.xls	1	0.0492567	40.918	0.927188	4.86311e-05	2.41685e-07
database_2014_05_21_Traj1_R.mat	E1_RT1D12.573F0001.xls	1	0.126538	59.0683	0.875259	0.000109786	3.66717e-07
database_2014_05_21_Traj1_R.mat	E1_RT1D13.183F0001.xls	1	0.043876	53.715	0.881904	0.000118524	2.1759e-07
database_2014_05_21_Traj1_R.mat	E1_RT1D13.387F0001.xls	1	0.436176	16.8124	2.50777	0.000646521	6.85457e-07
database_2014_05_21_Traj1_R.mat	E1_RT1D13.591F0001.xls	1	0.0822338	69.3737	0.858236	0.000206843	1.81851e-07
database_2014_05_21_Traj1_R.mat	E1_RT1D13.795F0001.xls	1	0.0668024	62.8841	0.920383	0.0004574	8.88172e-07
database_2014_05_21_Traj1_R.mat	E1_RT1D13.839F0001.xls	1	0.0640556	45.7364	0.969628	0.00035446	2.06804e-07
database_2014_05_21_Traj1_R.mat	E1_RT1D14.027F0001.xls	1	0.0315176	34.3202	0.850162	9.48435e-05	7.6627e-07
database_2014_05_21_Traj1_R.mat	E1_RT1D14.142F0001.xls	1	0.0911132	53.2089	0.896715	0.000368044	6.10781e-07
database_2014_05_21_Traj1_R.mat	E1_RT1D14.188F0001.xls	1	0.0629094	44.1184	0.895884	0.000106531	1.6006e-08
database_2014_05_21_Traj1_R.mat	E1_RT1D14.337F0001.xls	1	0.227222	13.3168	1.4877	0.000660985	2.66708e-07
database_2014_05_21_Traj1_R.mat	E1_RT1D14.501F0001.xls	1	0.0617453	30.0411	1.07027	0.000129439	9.8481e-07
database_2014_05_21_Traj1_R.mat	E1_RT1D14.617F0001.xls	1	0.104586	84.9066	0.827192	0.000373069	2.24542e-08
database_2014_05_21_Traj1_R.mat	E1_RT1D14.829F0001.xls	1	0.116255	105.648	0.787455	0.000229144	3.72235e-09
database_2014_05_21_Traj1_R.mat	E1_RT1D15.000F0001.xls	1	0.058341	47.8894	0.9044	0.000155392	1.1959e-08
database_2014_05_21_Traj1_R.mat	E1_RT1D7.709F0001.xls	1	0.525345	72.467	1.00919	0.000118834	6.68258e-09
database_2014_05_21_Traj1_R.mat	E1_RT1D7.913F0001.xls	1	0.0505142	51.1658	0.92259	9.96778e-05	1.53618e-07
database_2014_05_21_Traj1_R.mat	E1_RT1D8.081F0001.xls	1	0.0843007	52.5987	0.933835	8.17212e-05	1.68052e-07
database_2014_05_21_Traj1_R.mat	E1_RT1D8.237F0001.xls	1	0.560356	3.38963	0.492197	0.00224393	1.15209e-07
database_2014_05_21_Traj1_R.mat	E1_RT1D8.440F0001.xls	1	0.0389935	44.8181	0.975162	7.02049e-05	4.37583e-08
database_2014_05_21_Traj1_R.mat	E1_RT1D8.644F0001.xls	1	0.16086	146.184	0.720595	0.00182148	6.71196e-09
database_2014_05_21_Traj1_R.mat	E1_RT1D8.849F0001.xls	1	0.720997	10.6945	1.15039	0.00147912	1.97517e-07
database_2014_05_21_Traj1_R.mat	E1_RT1D9.025F0001.xls	1	0.0566668	37.9053	0.953618	0.000297824	4.29188e-08
database_2014_05_21_Traj1_R.mat	E1_RT1D9.214F0001.xls	1	0.0472123	55.5389	0.901773	6.34789e-05	7.25029e-08
database_2014_05_21_Traj1_R.mat	E1_RT1D9.418F0001.xls	1	0.0467267	55.8631	0.900122	9.4355e-05	9.67298e-09
database_2014_05_21_Traj1_R.mat	E1_RT1D9.622F0001.xls	1	0.102639	67.266	0.896727	0.000426017	4.25096e-08
database_2014_05_21_Traj1_R.mat	E1_RT1D9.828F0001.xls	1	0.049285	52.2297	0.918018	0.000131095	4.91103e-08
database_2014_05_21_Traj1_R.mat	E1_RT1D9.965F0001.xls	1	0.0619783	50.3169	0.934074	0.000129984	2.48111e-07
database_2014_05_21_Traj1_R.mat	E2_RT1D10.325F0001.xls	1	0.186166	57.2938	0.871508	0.000263737	1.01503e-07
database_2014_05_21_Traj1_R.mat	E2_RT1D11.771F0001.xls	1	0.0603985	42.2977	0.92583	0.000379515	2.65137e-07
database_2014_05_21_Traj1_R.mat	E2_RT1D11.964F0001.xls	1	0.106642	75.5963	0.817585	0.000266167	4.44891e-08
database_2014_05_21_Traj1_R.mat	E2_RT1D12.573F0001.xls	1	0.0666176	59.0683	0.875259	0.000237093	1.74007e-07
database_2014_05_21_Traj1_R.mat	E2_RT1D13.183F0001.xls	1	0.0711433	64.2918	0.877827	0.000242862	1.67374e-08
database_2014_05_21_Traj1_R.mat	E2_RT1D13.387F0001.xls	1	0.552644	5.61472	1.82371	0.00102435	7.52638e-07
database_2014_05_21_Traj1_R.mat	E2_RT1D13.591F0001.xls	1	0.0989894	63.0115	0.962527	0.00101513	7.33612e-08
database_2014_05_21_Traj1_R.mat	E2_RT1D13.795F0001.xls	1	0.0373496	34.8088	0.97704	7.86934e-05	1.79514e-07
database_2014_05_21_Traj1_R.mat	E2_RT1D13.839F0001.xls	1	0.23841	22.2728	0.855944	0.000235101	1.3369e-07
database_2014_05_21_Traj1_R.mat	E2_RT1D14.027F0001.xls	1	0.32147	21.163	0.704858	0.000306732	5.36438e-07
database_2014_05_21_Traj1_R.mat	E2_RT1D14.142F0001.xls	1	0.581369	21.3004	1.14032	0.00124213	5.70153e-08
database_2014_05_21_Traj1_R.mat	E2_RT1D14.188F0001.xls	1	0.0917361	61.8703	1.03545	0.00080488	8.24933e-09
database_2014_05_21_Traj1_R.mat	E2_RT1D14.337F0001.xls	1	0.0479811	51.9915	0.911063	0.000106975	1.07625e-08
database_2014_05_21_Traj1_R.mat	E2_RT1D14.501F0001.xls	1	0.0235464	28.4596	0.893283	8.07333e-05	3.23507e-06
database_2014_05_21_Traj1_R.mat	E2_RT1D14.617F0001.xls	1	0.0750296	62.7787	0.861234	7.80269e-05	1.85503e-07
database_2014_05_21_Traj1_R.mat	E2_RT1D14.829F0001.xls	1	0.0587796	46.4335	0.897701	9.46504e-05	1.82951e-07
database_2014_05_21_Traj1_R.mat	E2_RT1D15.000F0001.xls	1	0.0666309	45.4165	0.915078	0.000193971	1.2245e-08
database_2014_05_21_Traj1_R.mat	E2_RT1D9.965F0001.xls	1	0.100331	43.8644	0.925009	0.000254674	9.30168e-08
database_2014_05_21_Traj1_R.mat	E1_RT1D10.325F0001.xls	2	0.04868	33.0028	0.936725	0.000105476	8.73861e-08
database_2014_05_21_Traj1_R.mat	E1_RT1D11.771F0001.xls	2	0.0452959	53.1048	0.89757	4.51754e-05	6.26571e-07
database_2014_05_21_Traj1_R.mat	E1_RT1D11.964F0001.xls	2	0.0384119	40.4836	0.879373	4.86311e-05	2.36384e-07
database_2014_05_21_Traj1_R.mat	E1_RT1D12.573F0001.xls	2	0.0368355	14.3107	1.16058	0.000109786	2.60082e-06
database_2014_05_21_Traj1_R.mat	E1_RT1D13.183F0001.xls	2	0.0528409	39.3736	1.06767	0.000118524	2.62525e-07
database_2014_05_21_Traj1_R.mat	E1_RT1D13.387F0001.xls	2	0.126437	114.285	0.773318	0.000646521	4.18426e-08
database_2014_05_21_Traj1_R.mat	E1_RT1D13.591F0001.xls	2	0.152255	21.4041	1.3593	0.000206843	5.43398e-07
database_2014_05_21_Traj1_R.mat	E1_RT1D13.795F0001.xls	2	0.071823	69.1725	0.802997	0.0004574	1.60193e-06
database_2014_05_21_Traj1_R.mat	E1_RT1D13.839F0001.xls	2	0.0692422	65.0366	0.892101	0.00035446	1.23812e-07
database_2014_05_21_Traj1_R.mat	E1_RT1D14.027F0001.xls	2	0.0469344	29.8833	0.928043	9.48435e-05	8.41129e-07
database_2014_05_21_Traj1_R.mat	E1_RT1D14.142F0001.xls	2	0.0692472	63.6499	0.852245	0.000368044	4.52624e-07
database_2014_05_21_Traj1_R.mat	E1_RT1D14.188F0001.xls	2	0.0576897	35.9032	0.962636	0.000106531	1.87415e-08
database_2014_05_21_Traj1_R.mat	E1_RT1D14.337F0001.xls	2	0.177085	164.665	0.662039	0.000660985	9.24986e-09
database_2014_05_21_Traj1_R.mat	E1_RT1D14.501F0001.xls	2	0.0365155	33.7963	0.894641	0.000129439	5.08553e-07
database_2014_05_21_Traj1_R.mat	E1_RT1D14.617F0001.xls	2	0.130667	51.1933	0.963818	0.000373069	1.54668e-07
database_2014_05_21_Traj1_R.mat	E1_RT1D14.829F0001.xls	2	0.0930483	72.0002	0.958307	0.000229144	1.35852e-08
database_2014_05_21_Traj1_R.mat	E1_RT1D15.000F0001.xls	2	0.0606903	44.2565	0.901716	0.000155392	8.62907e-09
database_2014_05_21_Traj1_R.mat	E1_RT1D7.709F0001.xls	2	0.0978721	89.6262	0.86374	0.000118834	1.22718e-08
database_2014_05_21_Traj1_R.mat	E1_RT1D7.913F0001.xls	2	0.324743	20.2474	1.67477	9.96778e-05	6.99302e-07
database_2014_05_21_Traj1_R.mat	E1_RT1D8.081F0001.xls	2	0.0733212	48.9084	0.857692	8.17212e-05	3.22939e-07
database_2014_05_21_Traj1_R.mat	E1_RT1D8.237F0001.xls	2	0.173745	137.878	0.717806	0.00224393	2.71677e-09
database_2014_05_21_Traj1_R.mat	E1_RT1D8.440F0001.xls	2	0.0396842	36.2243	0.97978	7.02049e-05	3.52463e-08
database_2014_05_21_Traj1_R.mat	E1_RT1D8.849F0001.xls	2	0.136979	98.4974	0.828539	0.00147912	5.7984e-08
database_2014_05_21_Traj1_R.mat	E1_RT1D9.025F0001.xls	2	0.204609	4.24948	0.869455	0.000297824	4.70342e-07
database_2014_05_21_Traj1_R.mat	E1_RT1D9.214F0001.xls	2	0.046537	44.8751	0.917196	6.34789e-05	6.97436e-08
database_2014_05_21_Traj1_R.mat	E1_RT1D9.418F0001.xls	2	0.0540306	49.9019	0.937348	9.4355e-05	5.90188e-09
database_2014_05_21_Traj1_R.mat	E1_RT1D9.622F0001.xls	2	0.651528	1.43269	3.09987	0.000426017	4.92995e-07
database_2014_05_21_Traj1_R.mat	E1_RT1D9.828F0001.xls	2	0.0919115	34.6812	0.937143	0.000131095	6.16734e-08
database_2014_05_21_Traj1_R.mat	E1_RT1D9.965F0001.xls	2	0.0896795	48.0189	0.904844	0.000129984	2.75025e-07
database_2014_05_21_Traj1_R.mat	E2_RT1D10.325F0001.xls	2	0.0720217	58.709	0.939148	0.000263737	2.38528e-07
database_2014_05_21_Traj1_R.mat	E2_RT1D11.771F0001.xls	2	0.0710815	55.4425	0.98133	0.000379515	8.89017e-08
database_2014_05_21_Traj1_R.mat	E2_RT1D11.964F0001.xls	2	0.0991498	29.022	1.60512	0.000266167	1.7379e-07
database_2014_05_21_Traj1_R.mat	E2_RT1D12.573F0001.xls	2	0.135192	14.3107	1.16058	0.000237093	1.33514e-06
database_2014_05_21_Traj1_R.mat	E2_RT1D13.183F0001.xls	2	0.0450391	40.0521	0.95611	0.000242862	8.07509e-08
database_2014_05_21_Traj1_R.mat	E2_RT1D13.387F0001.xls	2	0.145451	149.319	0.737829	0.00102435	7.52284e-10
database_2014_05_21_Traj1_R.mat	E2_RT1D13.591F0001.xls	2	0.69825	1.56896	1.32321	0.00101513	3.22619e-06
database_2014_05_21_Traj1_R.mat	E2_RT1D13.795F0001.xls	2	0.0356413	21.0395	0.972128	7.86934e-05	2.22394e-07
database_2014_05_21_Traj1_R.mat	E2_RT1D13.839F0001.xls	2	0.101255	97.7409	0.815163	0.000235101	9.34912e-08
database_2014_05_21_Traj1_R.mat	E2_RT1D14.027F0001.xls	2	0.127708	126.325	0.728473	0.000306732	2.80217e-07
database_2014_05_21_Traj1_R.mat	E2_RT1D14.142F0001.xls	2	0.155721	114.808	0.801	0.00124213	2.9823e-08
database_2014_05_21_Traj1_R.mat	E2_RT1D14.188F0001.xls	2	0.592049	7.04803	2.61912	0.00080488	4.71106e-07
database_2014_05_21_Traj1_R.mat	E2_RT1D14.337F0001.xls	2	0.0505681	43.3348	0.935683	0.000106975	2.43016e-08
database_2014_05_21_Traj1_R.mat	E2_RT1D14.501F0001.xls	2	0.0336641	17.5529	0.929591	8.07333e-05	3.51584e-06
database_2014_05_21_Traj1_R.mat	E2_RT1D14.617F0001.xls	2	0.0737003	54.493	0.930719	7.80269e-05	2.38579e-07
database_2014_05_21_Traj1_R.mat	E2_RT1D14.829F0001.xls	2	0.047978	52.705	0.971407	9.46504e-05	1.91059e-07
database_2014_05_21_Traj1_R.mat	E2_RT1D15.000F0001.xls	2	0.0420409	32.7578	0.944176	0.000193971	1.19943e-08
database_2014_05_21_Traj1_R.mat	E2_RT1D9.965F0001.xls	2	0.0644541	40.0449	0.963012	0.000254674	9.23244e-08
database_2014_05_21_Traj1_R.mat	E1_RT1D10.325F0001.xls	3	0.0480527	43.0908	0.929527	0.000105476	6.613e-08
database_2014_05_21_Traj1_R.mat	E1_RT1D11.771F0001.xls	3	0.0390436	48.5604	0.817368	4.51754e-05	4.99433e-07
database_2014_05_21_Traj1_R.mat	E1_RT1D11.964F0001.xls	3	0.055868	33.8811	0.937807	4.86311e-05	1.78234e-07
database_2014_05_21_Traj1_R.mat	E1_RT1D12.573F0001.xls	3	0.0950519	44.6846	0.939294	0.000109786	4.63503e-07
database_2014_05_21_Traj1_R.mat	E1_RT1D13.183F0001.xls	3	0.0759348	49.7168	0.918705	0.000118524	3.32075e-07
database_2014_05_21_Traj1_R.mat	E1_RT1D13.591F0001.xls	3	0.0461785	47.3623	0.943494	0.000206843	1.33278e-07
database_2014_05_21_Traj1_R.mat	E1_RT1D13.795F0001.xls	3	0.142793	19.5272	1.1431	0.0004574	1.29843e-05
database_2014_05_21_Traj1_R.mat	E1_RT1D13.839F0001.xls	3	0.165756	5.73057	1.63473	0.00035446	3.09769e-06
database_2014_05_21_Traj1_R.mat	E1_RT1D14.027F0001.xls	3	0.0662701	36.0166	0.996854	9.48435e-05	6.50361e-07
database_2014_05_21_Traj1_R.mat	E1_RT1D14.142F0001.xls	3	0.34891	5.35435	0.832663	0.000368044	7.50225e-06
database_2014_05_21_Traj1_R.mat	E1_RT1D14.188F0001.xls	3	0.0528846	50.3558	0.852796	0.000106531	1.53482e-08
database_2014_05_21_Traj1_R.mat	E1_RT1D14.501F0001.xls	3	0.0386759	27.8222	0.970566	0.000129439	1.09557e-06
database_2014_05_21_Traj1_R.mat	E1_RT1D15.000F0001.xls	3	0.0748843	42.3589	0.978914	0.000155392	1.66295e-08
database_2014_05_21_Traj1_R.mat	E1_RT1D7.913F0001.xls	3	0.104508	56.2277	0.92775	9.96778e-05	1.98688e-07
database_2014_05_21_Traj1_R.mat	E1_RT1D8.081F0001.xls	3	0.0506435	43.6928	0.997652	8.17212e-05	2.04278e-07
database_2014_05_21_Traj1_R.mat	E1_RT1D8.440F0001.xls	3	0.0742283	45.7425	0.960369	7.02049e-05	4.98251e-08
database_2014_05_21_Traj1_R.mat	E1_RT1D9.025F0001.xls	3	0.0705509	54.45	0.831823	0.000297824	7.86719e-08
database_2014_05_21_Traj1_R.mat	E1_RT1D9.214F0001.xls	3	0.066957	50.2288	0.929361	6.34789e-05	8.72735e-08
database_2014_05_21_Traj1_R.mat	E1_RT1D9.418F0001.xls	3	0.0625103	52.8313	0.922392	9.4355e-05	1.07789e-08
database_2014_05_21_Traj1_R.mat	E1_RT1D9.622F0001.xls	3	0.0817154	78.1403	0.87638	0.000426017	3.69723e-08
database_2014_05_21_Traj1_R.mat	E1_RT1D9.828F0001.xls	3	0.0416134	46.699	0.950171	0.000131095	7.12769e-08
database_2014_05_21_Traj1_R.mat	E1_RT1D9.965F0001.xls	3	0.0474162	52.7939	0.933034	0.000129984	3.02845e-07
database_2014_05_21_Traj1_R.mat	E2_RT1D11.771F0001.xls	3	0.117482	33.1874	0.923036	0.000379515	1.87602e-07
database_2014_05_21_Traj1_R.mat	E2_RT1D11.964F0001.xls	3	0.0507024	26.1546	0.981786	0.000266167	2.67876e-07
database_2014_05_21_Traj1_R.mat	E2_RT1D12.573F0001.xls	3	0.0479218	44.6846	0.939294	0.000237093	1.76763e-07
database_2014_05_21_Traj1_R.mat	E2_RT1D13.183F0001.xls	3	0.0571376	43.6142	0.93141	0.000242862	5.27847e-08
database_2014_05_21_Traj1_R.mat	E2_RT1D13.591F0001.xls	3	0.285914	28.6968	1.30272	0.00101513	1.43731e-07
database_2014_05_21_Traj1_R.mat	E2_RT1D13.795F0001.xls	3	0.0732362	37.4525	1.01609	7.86934e-05	7.82527e-08
database_2014_05_21_Traj1_R.mat	E2_RT1D14.188F0001.xls	3	0.274803	37.907	0.995082	0.00080488	3.77566e-08
database_2014_05_21_Traj1_R.mat	E2_RT1D14.337F0001.xls	3	0.0616842	49.8656	0.8894	0.000106975	1.37095e-08
database_2014_05_21_Traj1_R.mat	E2_RT1D14.501F0001.xls	3	0.0156954	18.5754	0.918789	8.07333e-05	4.30466e-06
database_2014_05_21_Traj1_R.mat	E2_RT1D14.617F0001.xls	3	0.033351	51.8437	0.906209	7.80269e-05	2.22191e-07
database_2014_05_21_Traj1_R.mat	E2_RT1D14.829F0001.xls	3	0.0704953	28.1013	0.954097	9.46504e-05	5.31683e-07
database_2014_05_21_Traj1_R.mat	E2_RT1D15.000F0001.xls	3	0	1.59794	1.51131	0.000193971	3.02096e-07
database_2014_05_21_Traj1_R.mat	E2_RT1D9.965F0001.xls	3	0.051917	42.1039	0.946555	0.000254674	9.30928e-08
database_2014_05_21_Traj1_R.mat	E1_RT1D10.325F0001.xls	4	0.0431782	37.3849	0.963167	0.000105476	9.62707e-08
database_2014_05_21_Traj1_R.mat	E1_RT1D11.964F0001.xls	4	0.0315757	27.9736	0.912906	4.86311e-05	2.35964e-07
database_2014_05_21_Traj1_R.mat	E1_RT1D13.183F0001.xls	4	0.0423903	35.1147	0.948506	0.000118524	4.30692e-07
database_2014_05_21_Traj1_R.mat	E1_RT1D13.795F0001.xls	4	0.0262396	14.4523	0.945386	0.0004574	1.53889e-05
database_2014_05_21_Traj1_R.mat	E1_RT1D13.839F0001.xls	4	0.0323358	34.843	0.928744	0.00035446	1.53285e-07
database_2014_05_21_Traj1_R.mat	E1_RT1D14.027F0001.xls	4	0.0234163	27.6649	1.00258	9.48435e-05	7.76957e-07
database_2014_05_21_Traj1_R.mat	E1_RT1D14.142F0001.xls	4	0.0439839	37.949	0.9633	0.000368044	3.51284e-07
database_2014_05_21_Traj1_R.mat	E1_RT1D14.188F0001.xls	4	0.0534149	38.7177	0.965942	0.000106531	4.70474e-08
database_2014_05_21_Traj1_R.mat	E1_RT1D15.000F0001.xls	4	0.0329802	22.2843	1.08668	0.000155392	7.54507e-08
database_2014_05_21_Traj1_R.mat	E1_RT1D7.913F0001.xls	4	0.0458603	47.8824	0.919759	9.96778e-05	1.95614e-07
database_2014_05_21_Traj1_R.mat	E1_RT1D8.440F0001.xls	4	0.0514705	37.2985	0.956057	7.02049e-05	8.28772e-08
database_2014_05_21_Traj1_R.mat	E1_RT1D9.025F0001.xls	4	0.0466726	39.7185	0.869914	0.000297824	5.40593e-08
database_2014_05_21_Traj1_R.mat	E1_RT1D9.214F0001.xls	4	0.0409787	41.6977	0.907804	6.34789e-05	7.76825e-08
database_2014_05_21_Traj1_R.mat	E1_RT1D9.418F0001.xls	4	0.0329807	42.3838	0.935826	9.4355e-05	1.29061e-08
database_2014_05_21_Traj1_R.mat	E2_RT1D11.771F0001.xls	4	0.0301535	22.1249	1.07196	0.000379515	4.06892e-07
database_2014_05_21_Traj1_R.mat	E2_RT1D13.591F0001.xls	4	0.0259425	21.51	1.00764	0.00101513	2.43967e-07
database_2014_05_21_Traj1_R.mat	E2_RT1D13.795F0001.xls	4	0.0269843	26.3269	0.909944	7.86934e-05	3.02599e-07
database_2014_05_21_Traj1_R.mat	E2_RT1D14.188F0001.xls	4	0.0737371	13.5627	1.81265	0.00080488	5.92876e-08
database_2014_05_21_Traj1_R.mat	E2_RT1D14.337F0001.xls	4	0.0458722	39.8312	0.950762	0.000106975	1.43745e-08
database_2014_05_21_Traj1_R.mat	E2_RT1D14.501F0001.xls	4	0.02026	13.1221	0.826067	8.07333e-05	3.47818e-06
database_2014_05_21_Traj1_R.mat	E2_RT1D14.829F0001.xls	4	0.0284061	38.1719	0.923	9.46504e-05	3.16211e-07
database_2014_05_21_Traj1_R.mat	E2_RT1D15.000F0001.xls	4	0.0349655	34.93	0.941712	0.000193971	2.3055e-08
database_2014_05_21_Traj1_R.mat	E2_RT1D9.965F0001.xls	4	0.0555904	54.1293	0.889379	0.000254674	5.01258e-08
database_2014_05_21_Traj1_R.mat	E2_RT1D15.000F0001.xls	5	0.0505086	53.3313	0.888703	0.000193971	1.59098e-08
database_2014_05_21_Traj2_L.mat	E1_LT1D11.983F0001.xls	1	0.249381	49.2114	1.63096	7.59492e-05	1.96488e-07
database_2014_05_21_Traj2_L.mat	E1_LT1D12.183F0001.xls	1	0.056404	45.5669	0.891812	5.17198e-05	2.71198e-07
database_2014_05_21_Traj2_L.mat	E1_LT1D12.394F0001.xls	1	0.0589192	58.4416	0.890557	5.23435e-05	2.27368e-07
database_2014_05_21_Traj2_L.mat	E1_LT1D12.642F0001.xls	1	0.0372498	47.4533	0.902698	6.94077e-05	1.93327e-07
database_2014_05_21_Traj2_L.mat	E1_LT1D12.903F0001.xls	1	0.289843	67.5975	0.840133	0.000161089	6.36586e-07
database_2014_05_21_Traj2_L.mat	E1_LT1D13.165F0001.xls	1	0.287683	37.7735	0.859824	0.000392498	5.36994e-07
database_2014_05_21_Traj2_L.mat	E1_LT1D13.350F0001.xls	1	0.35548	21.9069	1.29876	0.000439586	8.42923e-07
database_2014_05_21_Traj2_L.mat	E1_LT1D13.520F0001.xls	1	0.0883843	44.7172	0.961264	0.000176642	1.67155e-07
database_2014_05_21_Traj2_L.mat	E1_LT1D13.749F0001.xls	1	0.0684844	74.2236	0.885872	0.000117831	3.83824e-07
database_2014_05_21_Traj2_L.mat	E1_LT1D14.039F0001.xls	1	0.0419059	34.833	0.932147	5.52805e-05	3.22995e-06
database_2014_05_21_Traj2_L.mat	E1_LT1D14.270F0001.xls	1	0.0536297	61.625	0.900214	0.000651874	3.20164e-06
database_2014_05_21_Traj2_L.mat	E1_LT1D14.469F0001.xls	1	0.0358268	43.7219	0.888456	5.47915e-05	7.80673e-07
database_2014_05_21_Traj2_L.mat	E1_LT1D14.633F0001.xls	1	0.0491828	50.7346	0.878593	5.19858e-05	8.5701e-08
database_2014_05_21_Traj2_L.mat	E1_LT1D14.815F0001.xls	1	0.191833	22.5633	0.893488	9.64309e-05	5.94494e-06
database_2014_05_21_Traj2_L.mat	E1_LT1D15.000F0004.xls	1	0.0353978	35.9189	0.889088	8.14767e-05	5.20882e-07
database_2014_05_21_Traj2_L.mat	E2_LT1D10.730F0001.xls	1	0.589976	43.6502	0.61779	0.000481146	1.0696e-07
database_2014_05_21_Traj2_L.mat	E2_LT1D10.905F0001.xls	1	0.785736	8.81399	0.62115	0.000981333	0.000277261
database_2014_05_21_Traj2_L.mat	E2_LT1D10.999F0001.xls	1	0.0964409	48.1871	0.890294	0.000239962	3.98401e-06
database_2014_05_21_Traj2_L.mat	E2_LT1D11.059F0001.xls	1	0.0380569	39.4557	0.964676	6.93425e-05	3.0489e-05
database_2014_05_21_Traj2_L.mat	E2_LT1D11.119F0001.xls	1	0.0797078	62.5686	0.843877	8.36385e-05	5.74017e-06
database_2014_05_21_Traj2_L.mat	E2_LT1D11.321F0001.xls	1	0.034444	34.2131	0.950692	7.28309e-05	2.5636e-05
database_2014_05_21_Traj2_L.mat	E2_LT1D11.483F0001.xls	1	0.0758398	52.3512	0.934798	7.69886e-05	3.9538e-06
database_2014_05_21_Traj2_L.mat	E2_LT1D11.617F0001.xls	1	0.0800716	56.3485	0.895655	5.93696e-05	4.17273e-06
database_2014_05_21_Traj2_L.mat	E2_LT1D11.671F0001.xls	1	0.547418	8.58678	1.71538	0.000493232	6.29156e-07
database_2014_05_21_Traj2_L.mat	E2_LT1D11.828F0001.xls	1	0.0334067	32.0668	0.954872	8.22998e-05	5.31713e-06
database_2014_05_21_Traj2_L.mat	E2_LT1D11.884F0001.xls	1	0.0482932	50.1108	0.897542	0.000142199	4.65987e-06
database_2014_05_21_Traj2_L.mat	E2_LT1D11.983F0001.xls	1	0.0436543	52.3504	0.905513	8.15473e-05	8.42564e-07
database_2014_05_21_Traj2_L.mat	E2_LT1D12.183F0001.xls	1	0.0926795	58.4318	0.851696	4.34442e-05	9.27993e-08
database_2014_05_21_Traj2_L.mat	E2_LT1D12.394F0001.xls	1	0.0613693	49.7971	0.876812	8.41796e-05	7.03874e-06
database_2014_05_21_Traj2_L.mat	E2_LT1D12.642F0001.xls	1	0.0454673	50.3697	0.899434	0.000152085	1.8447e-06
database_2014_05_21_Traj2_L.mat	E2_LT1D12.903F0001.xls	1	0.0549465	43.5254	0.903692	0.000136026	6.15273e-06
database_2014_05_21_Traj2_L.mat	E2_LT1D13.165F0001.xls	1	0.0440255	45.8483	0.979001	7.23446e-05	3.4318e-06
database_2014_05_21_Traj2_L.mat	E2_LT1D13.350F0001.xls	1	0.723965	1.61613	3.93519	0.000606857	9.42562e-06
database_2014_05_21_Traj2_L.mat	E2_LT1D13.520F0001.xls	1	0.0911885	73.159	0.845834	0.00017357	1.70999e-06
database_2014_05_21_Traj2_L.mat	E2_LT1D13.749F0001.xls	1	0.0483951	55.8923	0.937536	8.74574e-05	2.54578e-06
database_2014_05_21_Traj2_L.mat	E2_LT1D14.039F0001.xls	1	0.0741432	39.2731	0.943709	0.000248111	2.1691e-05
database_2014_05_21_Traj2_L.mat	E2_LT1D14.270F0001.xls	1	0.10572	106.846	0.809585	0.000244428	5.8802e-08
database_2014_05_21_Traj2_L.mat	E2_LT1D14.469F0001.xls	1	0.217444	19.11	1.31351	0.000767411	2.45964e-06
database_2014_05_21_Traj2_L.mat	E2_LT1D14.633F0001.xls	1	0.625848	4.74614	1.93218	0.000982761	2.74585e-06
database_2014_05_21_Traj2_L.mat	E2_LT1D14.815F0001.xls	1	0.0754106	49.4744	0.925892	0.000140669	4.74416e-07
database_2014_05_21_Traj2_L.mat	E2_LT1D15.000F0004.xls	1	0.0380906	45.1851	0.94399	7.88839e-05	9.32094e-07
database_2014_05_21_Traj2_L.mat	E1_LT1D11.983F0001.xls	2	0.110972	119.638	0.806465	7.59492e-05	2.8565e-07
database_2014_05_21_Traj2_L.mat	E1_LT1D12.183F0001.xls	2	0.0579917	54.5743	0.88977	5.17198e-05	2.6244e-07
database_2014_05_21_Traj2_L.mat	E1_LT1D12.394F0001.xls	2	0.0624505	51.571	0.894841	5.23435e-05	3.3804e-07
database_2014_05_21_Traj2_L.mat	E1_LT1D12.642F0001.xls	2	0.057262	41.0702	0.968786	6.94077e-05	2.77145e-07
database_2014_05_21_Traj2_L.mat	E1_LT1D12.903F0001.xls	2	0.0812887	74.1683	0.893759	0.000161089	5.85725e-07
database_2014_05_21_Traj2_L.mat	E1_LT1D13.165F0001.xls	2	0.133425	109.894	0.796256	0.000392498	2.99215e-07
database_2014_05_21_Traj2_L.mat	E1_LT1D13.350F0001.xls	2	0.133443	111.24	0.798296	0.000439586	4.69529e-08
database_2014_05_21_Traj2_L.mat	E1_LT1D13.520F0001.xls	2	0.345529	3.28803	0.868292	0.000176642	1.69659e-06
database_2014_05_21_Traj2_L.mat	E1_LT1D13.749F0001.xls	2	0.0898294	59.7686	0.881619	0.000117831	4.86808e-07
database_2014_05_21_Traj2_L.mat	E1_LT1D14.039F0001.xls	2	0.0416985	39.1512	0.939305	5.52805e-05	3.84312e-06
database_2014_05_21_Traj2_L.mat	E1_LT1D14.270F0001.xls	2	0.0644645	67.6208	0.863666	0.000651874	4.02461e-06
database_2014_05_21_Traj2_L.mat	E1_LT1D14.469F0001.xls	2	0.0296424	39.8065	0.893881	5.47915e-05	1.15389e-06
database_2014_05_21_Traj2_L.mat	E1_LT1D14.633F0001.xls	2	0.0567428	50.6688	0.900954	5.19858e-05	1.78143e-07
database_2014_05_21_Traj2_L.mat	E1_LT1D14.815F0001.xls	2	0.0932762	113.321	0.689061	9.64309e-05	3.8308e-07
database_2014_05_21_Traj2_L.mat	E1_LT1D15.000F0004.xls	2	0.0501238	29.6383	0.946254	8.14767e-05	3.22245e-07
database_2014_05_21_Traj2_L.mat	E2_LT1D10.730F0001.xls	2	0.242439	73.6399	0.840201	0.000481146	1.32071e-07
database_2014_05_21_Traj2_L.mat	E2_LT1D10.905F0001.xls	2	0.0973846	82.6312	0.815352	0.000981333	5.05795e-05
database_2014_05_21_Traj2_L.mat	E2_LT1D10.999F0001.xls	2	0.448926	6.12507	1.71256	0.000239962	6.17219e-05
database_2014_05_21_Traj2_L.mat	E2_LT1D11.059F0001.xls	2	0.0710222	40.6423	0.899454	6.93425e-05	4.56959e-06
database_2014_05_21_Traj2_L.mat	E2_LT1D11.119F0001.xls	2	0.0632277	54.154	0.895883	8.36385e-05	1.0515e-05
database_2014_05_21_Traj2_L.mat	E2_LT1D11.321F0001.xls	2	0.043376	38.0516	0.922464	7.28309e-05	1.4013e-05
database_2014_05_21_Traj2_L.mat	E2_LT1D11.483F0001.xls	2	0.03768	44.7518	0.892852	7.69886e-05	1.81138e-06
database_2014_05_21_Traj2_L.mat	E2_LT1D11.617F0001.xls	2	0.0451849	52.8355	0.916455	5.93696e-05	5.68103e-06
database_2014_05_21_Traj2_L.mat	E2_LT1D11.671F0001.xls	2	0.141034	161.241	0.665021	0.000493232	9.03947e-09
database_2014_05_21_Traj2_L.mat	E2_LT1D11.828F0001.xls	2	0.0512816	26.4192	0.889291	8.22998e-05	1.5522e-05
database_2014_05_21_Traj2_L.mat	E2_LT1D11.884F0001.xls	2	0.0930955	37.728	0.949544	0.000142199	2.58234e-06
database_2014_05_21_Traj2_L.mat	E2_LT1D11.983F0001.xls	2	0.0720716	39.5536	0.964109	8.15473e-05	5.26443e-07
database_2014_05_21_Traj2_L.mat	E2_LT1D12.183F0001.xls	2	0.0676141	56.691	0.915825	4.34442e-05	9.43258e-09
database_2014_05_21_Traj2_L.mat	E2_LT1D12.394F0001.xls	2	0.0616653	50.0452	0.878689	8.41796e-05	4.79956e-06
database_2014_05_21_Traj2_L.mat	E2_LT1D12.642F0001.xls	2	0.0538632	41.6389	1.00598	0.000152085	2.20576e-06
database_2014_05_21_Traj2_L.mat	E2_LT1D12.903F0001.xls	2	0.0720116	30.1803	0.966381	0.000136026	2.94603e-06
database_2014_05_21_Traj2_L.mat	E2_LT1D13.165F0001.xls	2	0.0396288	37.9078	0.917444	7.23446e-05	2.39067e-06
database_2014_05_21_Traj2_L.mat	E2_LT1D13.350F0001.xls	2	0.13064	123.813	0.758117	0.000606857	8.02654e-09
database_2014_05_21_Traj2_L.mat	E2_LT1D13.520F0001.xls	2	0.0734189	46.1641	0.910391	0.00017357	3.01533e-06
database_2014_05_21_Traj2_L.mat	E2_LT1D13.749F0001.xls	2	0.0679431	47.8235	0.945382	8.74574e-05	3.05797e-06
database_2014_05_21_Traj2_L.mat	E2_LT1D14.039F0001.xls	2	0.0354517	29.4908	0.940555	0.000248111	7.77868e-06
database_2014_05_21_Traj2_L.mat	E2_LT1D14.270F0001.xls	2	0.165696	35.8992	1.09859	0.000244428	9.62104e-07
database_2014_05_21_Traj2_L.mat	E2_LT1D14.469F0001.xls	2	0.141304	161.176	0.661779	0.000767411	1.54805e-07
database_2014_05_21_Traj2_L.mat	E2_LT1D14.633F0001.xls	2	0.123025	118.291	0.775061	0.000982761	5.87244e-08
database_2014_05_21_Traj2_L.mat	E2_LT1D14.815F0001.xls	2	0.0259967	27.4438	0.994449	0.000140669	1.14246e-06
database_2014_05_21_Traj2_L.mat	E2_LT1D15.000F0004.xls	2	0.0546702	34.5393	0.875833	7.88839e-05	7.78909e-07
database_2014_05_21_Traj2_L.mat	E1_LT1D12.183F0001.xls	3	0.0381861	48.746	0.945208	5.17198e-05	2.08219e-07
database_2014_05_21_Traj2_L.mat	E1_LT1D12.394F0001.xls	3	0.0726452	59.0211	0.890469	5.23435e-05	1.38743e-07
database_2014_05_21_Traj2_L.mat	E1_LT1D12.642F0001.xls	3	0.0532823	48.5452	0.878546	6.94077e-05	1.82145e-07
database_2014_05_21_Traj2_L.mat	E1_LT1D13.165F0001.xls	3	0.384476	2.0668	0.98423	0.000392498	1.79394e-05
database_2014_05_21_Traj2_L.mat	E1_LT1D13.520F0001.xls	3	0.0588612	64.7084	0.871948	0.000176642	9.92513e-08
database_2014_05_21_Traj2_L.mat	E1_LT1D13.749F0001.xls	3	0.0468261	73.0908	0.881335	0.000117831	3.71148e-07
database_2014_05_21_Traj2_L.mat	E1_LT1D14.039F0001.xls	3	0.0579507	41.886	0.983601	5.52805e-05	2.97033e-06
database_2014_05_21_Traj2_L.mat	E1_LT1D14.270F0001.xls	3	0.0403078	51.8686	0.944286	0.000651874	5.16212e-06
database_2014_05_21_Traj2_L.mat	E1_LT1D14.469F0001.xls	3	0.0560556	45.7262	0.928396	5.47915e-05	6.97937e-07
database_2014_05_21_Traj2_L.mat	E1_LT1D14.633F0001.xls	3	0.0365047	41.9441	0.94373	5.19858e-05	1.72551e-07
database_2014_05_21_Traj2_L.mat	E1_LT1D15.000F0004.xls	3	0.0408113	33.3169	0.928438	8.14767e-05	5.44239e-07
database_2014_05_21_Traj2_L.mat	E2_LT1D10.999F0001.xls	3	0.044199	44.6461	0.943536	0.000239962	2.65963e-06
database_2014_05_21_Traj2_L.mat	E2_LT1D11.059F0001.xls	3	0.0596781	43.8067	0.972833	6.93425e-05	1.48075e-05
database_2014_05_21_Traj2_L.mat	E2_LT1D11.119F0001.xls	3	0.0623289	57.7364	0.946937	8.36385e-05	7.2773e-06
database_2014_05_21_Traj2_L.mat	E2_LT1D11.321F0001.xls	3	0.0419699	23.5319	0.921711	7.28309e-05	9.20063e-06
database_2014_05_21_Traj2_L.mat	E2_LT1D11.483F0001.xls	3	0.0544456	49.5366	0.890991	7.69886e-05	3.77216e-06
database_2014_05_21_Traj2_L.mat	E2_LT1D11.617F0001.xls	3	0.0537257	57.7537	0.843671	5.93696e-05	1.54566e-06
database_2014_05_21_Traj2_L.mat	E2_LT1D11.828F0001.xls	3	0.0259806	24.4091	0.974415	8.22998e-05	9.51152e-05
database_2014_05_21_Traj2_L.mat	E2_LT1D11.884F0001.xls	3	0.0517494	46.0759	0.943377	0.000142199	4.08739e-06
database_2014_05_21_Traj2_L.mat	E2_LT1D11.983F0001.xls	3	0.0696296	46.7276	0.957835	8.15473e-05	6.5741e-07
database_2014_05_21_Traj2_L.mat	E2_LT1D12.183F0001.xls	3	0.0430424	45.489	0.894214	4.34442e-05	3.751e-08
database_2014_05_21_Traj2_L.mat	E2_LT1D12.394F0001.xls	3	0.0470962	26.5529	0.944188	8.41796e-05	2.40186e-05
database_2014_05_21_Traj2_L.mat	E2_LT1D12.642F0001.xls	3	0.074006	50.7055	0.933078	0.000152085	3.38666e-06
database_2014_05_21_Traj2_L.mat	E2_LT1D12.903F0001.xls	3	0.0524175	47.2209	0.95878	0.000136026	2.33546e-06
database_2014_05_21_Traj2_L.mat	E2_LT1D13.165F0001.xls	3	0.0675375	50.1177	0.950709	7.23446e-05	2.39415e-06
database_2014_05_21_Traj2_L.mat	E2_LT1D13.520F0001.xls	3	0.0597969	61.7823	0.94131	0.00017357	2.11473e-06
database_2014_05_21_Traj2_L.mat	E2_LT1D13.749F0001.xls	3	0.0683493	38.8028	0.935014	8.74574e-05	4.68374e-06
database_2014_05_21_Traj2_L.mat	E2_LT1D14.039F0001.xls	3	0.655877	0.431573	1.29741	0.000248111	0.000379902
database_2014_05_21_Traj2_L.mat	E2_LT1D14.270F0001.xls	3	0.0586755	45.7608	1.08622	0.000244428	5.6476e-07
database_2014_05_21_Traj2_L.mat	E2_LT1D14.815F0001.xls	3	0.0760686	15.7361	1.0521	0.000140669	9.19442e-07
database_2014_05_21_Traj2_L.mat	E2_LT1D15.000F0004.xls	3	0.0647273	46.0823	0.936106	7.88839e-05	3.37125e-07
database_2014_05_21_Traj2_L.mat	E1_LT1D12.394F0001.xls	4	0.0523237	49.5015	0.945312	5.23435e-05	1.05321e-07
database_2014_05_21_Traj2_L.mat	E1_LT1D12.642F0001.xls	4	0.0428285	38.8026	0.903984	6.94077e-05	3.11719e-07
database_2014_05_21_Traj2_L.mat	E1_LT1D13.520F0001.xls	4	0.063273	48.071	0.905597	0.000176642	1.88657e-07
database_2014_05_21_Traj2_L.mat	E1_LT1D14.039F0001.xls	4	0.0294015	39.2951	1.04972	5.52805e-05	1.74796e-06
database_2014_05_21_Traj2_L.mat	E1_LT1D14.469F0001.xls	4	0.041367	35.0521	0.959527	5.47915e-05	1.303e-06
database_2014_05_21_Traj2_L.mat	E1_LT1D14.633F0001.xls	4	0.0382225	38.2238	0.962401	5.19858e-05	1.34045e-07
database_2014_05_21_Traj2_L.mat	E1_LT1D15.000F0004.xls	4	0.0252569	24.6138	0.972736	8.14767e-05	4.27389e-07
database_2014_05_21_Traj2_L.mat	E2_LT1D10.999F0001.xls	4	0.040125	36.9897	0.990625	0.000239962	7.85217e-06
database_2014_05_21_Traj2_L.mat	E2_LT1D11.321F0001.xls	4	0.0255185	21.1954	0.922561	7.28309e-05	1.10109e-05
database_2014_05_21_Traj2_L.mat	E2_LT1D11.483F0001.xls	4	0.146507	9.14739	1.49077	7.69886e-05	5.11545e-05
database_2014_05_21_Traj2_L.mat	E2_LT1D11.884F0001.xls	4	0.0413733	34.5975	0.947935	0.000142199	3.04787e-06
database_2014_05_21_Traj2_L.mat	E2_LT1D11.983F0001.xls	4	0.0334414	33.2522	1.10156	8.15473e-05	1.02905e-06
database_2014_05_21_Traj2_L.mat	E2_LT1D12.394F0001.xls	4	0.0330652	37.2237	0.94768	8.41796e-05	1.16798e-05
database_2014_05_21_Traj2_L.mat	E2_LT1D12.903F0001.xls	4	0.0275753	34.2454	0.989263	0.000136026	1.75008e-06
database_2014_05_21_Traj2_L.mat	E2_LT1D13.165F0001.xls	4	0.0342525	34.3999	0.940616	7.23446e-05	3.35381e-06
database_2014_05_21_Traj2_L.mat	E2_LT1D13.749F0001.xls	4	0.0541713	35.403	0.934417	8.74574e-05	6.15179e-06
database_2014_05_21_Traj2_L.mat	E2_LT1D14.039F0001.xls	4	0.0257689	23.1611	0.924727	0.000248111	1.63303e-05
database_2014_05_21_Traj2_L.mat	E2_LT1D14.815F0001.xls	4	0.04762	29.5839	0.980724	0.000140669	9.59884e-07
database_2014_05_21_Traj2_L.mat	E2_LT1D15.000F0004.xls	4	0.0468774	33.7019	0.981649	7.88839e-05	6.52445e-07
database_2014_05_21_Traj2_L.mat	E1_LT1D15.000F0004.xls	5	0.0201848	14.2958	1.0185	8.14767e-05	4.8264e-07
database_2014_05_21_Traj2_L.mat	E2_LT1D14.039F0001.xls	5	0.0342437	42.1503	0.900884	0.000248111	5.33301e-06
database_2015_04_15_Traj1_R.mat	E1_RT1D10.044F0001.xls	1	0.0450993	60.5889	0.934747	3.803e-05	2.40971e-07
database_2015_04_15_Traj1_R.mat	E1_RT1D10.176F0001.xls	1	0.0402108	36.9329	0.939745	3.77714e-05	4.01428e-08
database_2015_04_15_Traj1_R.mat	E1_RT1D9.913F0001.xls	1	0.126678	127.271	0.714572	0.000696074	4.78536e-08
database_2015_04_15_Traj1_R.mat	E1_RT1D10.044F0001.xls	1	0.0623365	75.2443	0.891174	3.803e-05	2.40971e-07
database_2015_04_15_Traj1_R.mat	E1_RT1D10.176F0001.xls	1	0.0366411	43.2194	0.946848	3.77714e-05	4.01428e-08
database_2015_04_15_Traj1_R.mat	E1_RT1D9.913F0001.xls	2	0.284193	13.4465	1.34104	0.000696074	4.46671e-07
database_2015_04_15_Traj1_R.mat	E1_RT1D10.044F0001.xls	2	0.0485128	59.1135	0.884505	3.803e-05	2.60031e-07
database_2015_04_15_Traj1_R.mat	E1_RT1D10.176F0001.xls	2	0.0459188	35.5578	0.872295	3.77714e-05	3.19752e-08
database_2015_04_15_Traj1_R.mat	E1_RT1D9.913F0001.xls	2	0.0721438	23.0389	1.07912	0.000696074	4.46671e-07
database_2015_04_15_Traj1_R.mat	E1_RT1D10.176F0001.xls	3	0.0287692	41.0584	0.891677	3.77714e-05	3.30777e-08
database_2015_04_15_Traj2_L.mat	E2_LT1D11.972F0001.xls	1	0.0237904	28.4243	0.903652	4.88412e-05	2.26066e-06
database_2015_04_15_Traj2_L.mat	E2_LT1D12.500F0001.xls	1	0.0424232	51.3159	0.901809	0.00242021	1.91435e-09
database_2015_04_15_Traj2_L.mat	E2_LT1D12.758F0001.xls	1	0.0542145	60.4984	0.844184	5.16021e-05	8.39492e-08
database_2015_04_15_Traj2_L.mat	E2_LT1D13.289F0001.xls	1	0.0379148	38.1138	0.978196	0.000317379	2.02679e-07
database_2015_04_15_Traj2_L.mat	E2_LT1D13.560F0001.xls	1	0.0600263	59.9606	0.91107	0.000317962	6.72923e-08
database_2015_04_15_Traj2_L.mat	E2_LT1D13.736F0001.xls	1	0.102112	76.5571	0.882338	0.000261402	2.59606e-08
database_2015_04_15_Traj2_L.mat	E2_LT1D13.949F0001.xls	1	0.101181	82.6601	0.832275	0.00241284	4.54639e-09
database_2015_04_15_Traj2_L.mat	E2_LT1D14.159F0001.xls	1	0.0676475	51.4685	0.899169	0.000124851	1.68715e-07
database_2015_04_15_Traj2_L.mat	E2_LT1D14.263F0001.xls	1	0.676583	14.3617	3.25016	0.000658575	3.78575e-07
database_2015_04_15_Traj2_L.mat	E2_LT1D14.368F0001.xls	1	0.699699	10.0348	1.87161	0.000879451	6.45882e-07
database_2015_04_15_Traj2_L.mat	E2_LT1D14.474F0001.xls	1	0.437295	5.80118	2.27819	0.000301543	2.71878e-07
database_2015_04_15_Traj2_L.mat	E2_LT1D14.579F0001.xls	1	0.0624132	49.5897	0.886635	6.12867e-05	2.24327e-07
database_2015_04_15_Traj2_L.mat	E2_LT1D14.686F0001.xls	1	0.0700877	54.7899	0.930517	5.78995e-05	2.87879e-07
database_2015_04_15_Traj2_L.mat	E2_LT1D14.794F0001.xls	1	0.0394156	44.6279	0.986266	6.44578e-05	1.4851e-07
database_2015_04_15_Traj2_L.mat	E2_LT1D14.899F0001.xls	1	0.0254783	22.3091	1.00326	7.29558e-05	3.49088e-06
database_2015_04_15_Traj2_L.mat	E2_LT1D11.972F0001.xls	2	0.0209478	17.5114	0.823623	4.88412e-05	2.02728e-06
database_2015_04_15_Traj2_L.mat	E2_LT1D12.500F0001.xls	2	0.0379242	38.1346	0.975757	0.00242021	2.77462e-08
database_2015_04_15_Traj2_L.mat	E2_LT1D12.758F0001.xls	2	0.0580378	54.9396	0.876744	5.16021e-05	9.98661e-08
database_2015_04_15_Traj2_L.mat	E2_LT1D13.289F0001.xls	2	0.0900165	75.3539	1.06207	0.000317379	7.4602e-08
database_2015_04_15_Traj2_L.mat	E2_LT1D13.560F0001.xls	2	0.130439	31.7569	0.97181	0.000317962	2.22516e-07
database_2015_04_15_Traj2_L.mat	E2_LT1D13.736F0001.xls	2	0.314802	5.79666	1.35459	0.000261402	6.7666e-07
database_2015_04_15_Traj2_L.mat	E2_LT1D13.949F0001.xls	2	0.147858	18.2903	1.27505	0.00241284	6.19969e-08
database_2015_04_15_Traj2_L.mat	E2_LT1D14.159F0001.xls	2	0.0829529	45.3379	0.892522	0.000124851	2.42231e-07
database_2015_04_15_Traj2_L.mat	E2_LT1D14.263F0001.xls	2	0.107245	82.4865	0.825081	0.000658575	8.01235e-08
database_2015_04_15_Traj2_L.mat	E2_LT1D14.368F0001.xls	2	0.13531	121.505	0.73041	0.000879451	7.47731e-08
database_2015_04_15_Traj2_L.mat	E2_LT1D14.474F0001.xls	2	0.096185	87.6745	0.807807	0.000301543	5.3487e-08
database_2015_04_15_Traj2_L.mat	E2_LT1D14.579F0001.xls	2	0.0696262	52.8957	0.893128	6.12867e-05	1.08536e-07
database_2015_04_15_Traj2_L.mat	E2_LT1D14.686F0001.xls	2	0.0716415	52.086	0.865037	5.78995e-05	4.03009e-07
database_2015_04_15_Traj2_L.mat	E2_LT1D14.794F0001.xls	2	0.0402402	33.8624	0.879172	6.44578e-05	1.49341e-07
database_2015_04_15_Traj2_L.mat	E2_LT1D14.899F0001.xls	2	0.0330895	25.9146	0.943763	7.29558e-05	1.88202e-06
database_2015_04_15_Traj2_L.mat	E2_LT1D11.972F0001.xls	3	0.0263451	30.7084	0.985977	4.88412e-05	3.23996e-06
database_2015_04_15_Traj2_L.mat	E2_LT1D12.500F0001.xls	3	0.0647119	46.0931	0.917161	0.00242021	9.65434e-09
database_2015_04_15_Traj2_L.mat	E2_LT1D12.758F0001.xls	3	0.0430444	44.4705	0.958573	5.16021e-05	1.56224e-07
database_2015_04_15_Traj2_L.mat	E2_LT1D13.289F0001.xls	3	0.152521	18.5576	2.08091	0.000317379	4.28925e-07
database_2015_04_15_Traj2_L.mat	E2_LT1D13.560F0001.xls	3	0.0668952	41.9169	0.993954	0.000317962	1.59183e-07
database_2015_04_15_Traj2_L.mat	E2_LT1D13.736F0001.xls	3	0.0666577	65.341	0.891794	0.000261402	5.52239e-08
database_2015_04_15_Traj2_L.mat	E2_LT1D13.949F0001.xls	3	0.25488	23.1408	1.24814	0.00241284	2.34858e-08
database_2015_04_15_Traj2_L.mat	E2_LT1D14.159F0001.xls	3	0.0558588	53.0368	0.960438	0.000124851	1.6402e-07
database_2015_04_15_Traj2_L.mat	E2_LT1D14.474F0001.xls	3	0.317231	5.85591	1.60022	0.000301543	1.3177e-07
database_2015_04_15_Traj2_L.mat	E2_LT1D14.579F0001.xls	3	0.045512	54.3038	0.930802	6.12867e-05	1.50692e-07
database_2015_04_15_Traj2_L.mat	E2_LT1D14.686F0001.xls	3	0.046039	50.236	0.979162	5.78995e-05	3.929e-07
database_2015_04_15_Traj2_L.mat	E2_LT1D14.794F0001.xls	3	0.0622306	46.259	0.969624	6.44578e-05	9.90787e-08
database_2015_04_15_Traj2_L.mat	E2_LT1D14.899F0001.xls	3	0.0359086	34.2523	0.985013	7.29558e-05	1.33804e-06
database_2015_04_15_Traj2_L.mat	E2_LT1D11.972F0001.xls	4	0.0168643	28.4243	1.02253	4.88412e-05	1.26395e-06
database_2015_04_15_Traj2_L.mat	E2_LT1D13.289F0001.xls	4	0.453708	7.4064	2.19198	0.000317379	7.24422e-07
database_2015_04_15_Traj2_L.mat	E2_LT1D13.560F0001.xls	4	0.0307638	24.7615	1.36254	0.000317962	3.18973e-07
database_2015_04_15_Traj2_L.mat	E2_LT1D13.949F0001.xls	4	0.0907459	5.75994	1.10036	0.00241284	3.22483e-08
database_2015_04_15_Traj2_L.mat	E2_LT1D14.474F0001.xls	4	0.136679	29.0059	1.06343	0.000301543	8.99038e-08
database_2015_04_15_Traj2_L.mat	E2_LT1D14.794F0001.xls	4	0.0323565	30.4044	0.993339	6.44578e-05	1.30676e-07
database_2015_04_15_Traj2_L.mat	E2_LT1D14.899F0001.xls	4	0.00380081	6.53498	0.875116	7.29558e-05	5.42731e-06
database_2015_04_15_Traj2_L.mat	E2_LT1D13.289F0001.xls	5	0.0348925	5.49239	3.6967	0.000317379	3.59273e-06
database_2015_04_15_Traj2_L.mat	E2_LT1D14.474F0001.xls	5	0.0676683	5.41809	3.24083	0.000301543	4.68352e-07
database_2016_09_25_Traj1_L.mat	E1_LT1D11.021F0001.xls	1	0.109839	79.9714	0.896361	0.000161635	1.39316e-07
database_2016_09_25_Traj1_L.mat	E1_LT1D11.322F0001.xls	1	0.0730998	60.3987	0.935929	9.24796e-05	4.08135e-07
database_2016_09_25_Traj1_L.mat	E1_LT1D11.782F0001.xls	1	0.0515426	44.5108	0.923378	0.000179784	8.75532e-07
database_2016_09_25_Traj1_L.mat	E1_LT1D12.109F0001.xls	1	0.0461839	51.6556	0.920354	0.000152845	8.98585e-08
database_2016_09_25_Traj1_L.mat	E1_LT1D12.478F0001.xls	1	0.544688	4.97388	3.02898	0.000764664	9.94538e-08
database_2016_09_25_Traj1_L.mat	E1_LT1D12.829F0001.xls	1	0.0498241	51.9204	0.837715	0.000175089	2.93664e-07
database_2016_09_25_Traj1_L.mat	E1_LT1D13.158F0001.xls	1	0.0591978	35.4314	0.913737	0.000220689	2.03824e-06
database_2016_09_25_Traj1_L.mat	E1_LT1D13.550F0001.xls	1	0.0606647	56.9773	0.936344	0.000130233	1.33011e-07
database_2016_09_25_Traj1_L.mat	E1_LT1D13.830F0002.xls	1	0.641314	3.71448	2.05439	0.000745792	4.46403e-06
database_2016_09_25_Traj1_L.mat	E1_LT1D13.988F0003.xls	1	0.0919758	106.429	0.803622	0.00337124	3.30978e-06
database_2016_09_25_Traj1_L.mat	E1_LT1D14.077F0001.xls	1	0.342511	24.1635	0.959693	0.00122508	4.16918e-07
database_2016_09_25_Traj1_L.mat	E1_LT1D14.304F0001.xls	1	0.249837	17.8175	1.33456	0.000897681	4.00054e-07
database_2016_09_25_Traj1_L.mat	E1_LT1D14.613F0001.xls	1	0.0611281	52.5725	0.902346	6.20211e-05	5.13888e-07
database_2016_09_25_Traj1_L.mat	E1_LT1D14.714F0001.xls	1	0.0396751	53.1843	0.880737	6.32595e-05	4.18793e-07
database_2016_09_25_Traj1_L.mat	E1_LT1D14.796F0001.xls	1	0.0564804	52.2197	0.865519	0.000116292	7.62746e-07
database_2016_09_25_Traj1_L.mat	E1_LT1D14.899F0001.xls	1	0.0310367	33.5332	0.966594	6.623e-05	2.62252e-06
database_2016_09_25_Traj1_L.mat	E1_LT1D15.000F0001.xls	1	0.0322629	44.088	0.940587	9.15347e-05	2.28655e-07
database_2016_09_25_Traj1_L.mat	E2_LT1D10.019F0001.xls	1	0.543694	60.7824	1.13167	0.000251922	1.18982e-07
database_2016_09_25_Traj1_L.mat	E2_LT1D10.182F0001.xls	1	0.160307	47.024	0.958946	7.86125e-05	1.76838e-06
database_2016_09_25_Traj1_L.mat	E2_LT1D10.364F0001.xls	1	0.0531235	49.631	0.938741	7.41121e-05	5.9156e-07
database_2016_09_25_Traj1_L.mat	E2_LT1D10.565F0001.xls	1	0.0682973	39.4944	0.916707	0.000206008	2.35613e-06
database_2016_09_25_Traj1_L.mat	E2_LT1D10.721F0001.xls	1	0.0595245	42.1413	0.977196	0.000166341	7.45624e-07
database_2016_09_25_Traj1_L.mat	E2_LT1D10.929F0003.xls	1	0.0823202	102.567	0.89901	0.0123991	3.27136e-06
database_2016_09_25_Traj1_L.mat	E2_LT1D11.021F0001.xls	1	0.0848157	49.6571	0.937819	0.000121531	1.3372e-07
database_2016_09_25_Traj1_L.mat	E2_LT1D11.322F0001.xls	1	0.0580766	48.4962	0.933566	5.8466e-05	2.94422e-07
database_2016_09_25_Traj1_L.mat	E2_LT1D11.782F0001.xls	1	0.553769	5.69606	0.66802	0.000604592	4.51386e-06
database_2016_09_25_Traj1_L.mat	E2_LT1D12.109F0001.xls	1	0.0706154	67.8996	0.802156	0.00023506	4.22778e-07
database_2016_09_25_Traj1_L.mat	E2_LT1D12.478F0001.xls	1	0.0262964	3.47212	0.865091	0.000490318	2.48484e-07
database_2016_09_25_Traj1_L.mat	E2_LT1D12.829F0001.xls	1	0.069407	67.3652	0.895599	0.000162015	3.80521e-07
database_2016_09_25_Traj1_L.mat	E2_LT1D13.158F0001.xls	1	0.0349976	41.4532	0.919828	8.50182e-05	1.92359e-07
database_2016_09_25_Traj1_L.mat	E2_LT1D13.550F0001.xls	1	0.0441999	39.6167	0.896876	8.74252e-05	4.7437e-07
database_2016_09_25_Traj1_L.mat	E2_LT1D13.830F0002.xls	1	0.0288238	32.3459	0.946704	7.4598e-05	6.59794e-06
database_2016_09_25_Traj1_L.mat	E2_LT1D13.988F0003.xls	1	0.110304	77.6716	0.794305	0.00295893	4.04541e-06
database_2016_09_25_Traj1_L.mat	E2_LT1D14.077F0001.xls	1	0.705733	2.30923	1.75649	0.000619555	1.57467e-06
database_2016_09_25_Traj1_L.mat	E2_LT1D14.304F0001.xls	1	0.0695666	75.0187	0.856356	0.0017211	2.47804e-08
database_2016_09_25_Traj1_L.mat	E2_LT1D14.613F0001.xls	1	0.0482951	45.7863	0.958808	7.42724e-05	2.03607e-06
database_2016_09_25_Traj1_L.mat	E2_LT1D14.714F0001.xls	1	0.0251954	35.4255	0.846158	8.86292e-05	2.05071e-06
database_2016_09_25_Traj1_L.mat	E2_LT1D14.796F0001.xls	1	0.0504285	44.2738	0.906983	8.69528e-05	3.61432e-06
database_2016_09_25_Traj1_L.mat	E2_LT1D14.899F0001.xls	1	0.0296725	36.6693	0.905925	8.80579e-05	5.52169e-06
database_2016_09_25_Traj1_L.mat	E2_LT1D15.000F0001.xls	1	0.0715094	49.3169	0.961503	9.1525e-05	6.86021e-07
database_2016_09_25_Traj1_L.mat	E1_LT1D11.021F0001.xls	2	0.186957	34.5591	0.776911	0.000161635	1.77329e-07
database_2016_09_25_Traj1_L.mat	E1_LT1D11.322F0001.xls	2	0.0737578	54.9417	0.937271	9.24796e-05	1.1886e-07
database_2016_09_25_Traj1_L.mat	E1_LT1D11.782F0001.xls	2	0.0581895	45.1987	0.891786	0.000179784	7.52262e-07
database_2016_09_25_Traj1_L.mat	E1_LT1D12.109F0001.xls	2	0.0715259	42.8791	0.94082	0.000152845	1.67097e-07
database_2016_09_25_Traj1_L.mat	E1_LT1D12.478F0001.xls	2	0.108205	104.811	0.836297	0.000764664	4.10797e-08
database_2016_09_25_Traj1_L.mat	E1_LT1D12.829F0001.xls	2	0.0515284	16.7326	1.04942	0.000175089	7.97203e-07
database_2016_09_25_Traj1_L.mat	E1_LT1D13.158F0001.xls	2	0.0514813	43.0031	0.940193	0.000220689	1.1845e-06
database_2016_09_25_Traj1_L.mat	E1_LT1D13.550F0001.xls	2	0.0575735	30.6452	0.990327	0.000130233	3.60995e-07
database_2016_09_25_Traj1_L.mat	E1_LT1D13.830F0002.xls	2	0.117635	127.221	0.706344	0.000745792	1.20847e-07
database_2016_09_25_Traj1_L.mat	E1_LT1D14.077F0001.xls	2	0.158733	90.1181	0.883694	0.00122508	1.48801e-07
database_2016_09_25_Traj1_L.mat	E1_LT1D14.304F0001.xls	2	0.725141	2.57069	2.0036	0.000897681	1.07474e-05
database_2016_09_25_Traj1_L.mat	E1_LT1D14.613F0001.xls	2	0.04367	54.7957	0.874817	6.20211e-05	3.57163e-07
database_2016_09_25_Traj1_L.mat	E1_LT1D14.714F0001.xls	2	0.0767029	57.082	0.885124	6.32595e-05	2.91183e-07
database_2016_09_25_Traj1_L.mat	E1_LT1D14.796F0001.xls	2	0.0539098	57.306	0.949761	0.000116292	5.62972e-07
database_2016_09_25_Traj1_L.mat	E1_LT1D14.899F0001.xls	2	0.0271447	28.1052	0.972992	6.623e-05	3.16938e-06
database_2016_09_25_Traj1_L.mat	E1_LT1D15.000F0001.xls	2	0.0661555	36.3377	0.921518	9.15347e-05	1.26195e-07
database_2016_09_25_Traj1_L.mat	E2_LT1D10.019F0001.xls	2	0.0943201	80.2269	0.894433	0.000251922	1.58508e-07
database_2016_09_25_Traj1_L.mat	E2_LT1D10.182F0001.xls	2	0.0829341	87.3913	0.805392	7.86125e-05	1.07515e-06
database_2016_09_25_Traj1_L.mat	E2_LT1D10.364F0001.xls	2	0.0617562	45.1567	0.9761	7.41121e-05	6.51877e-07
database_2016_09_25_Traj1_L.mat	E2_LT1D10.565F0001.xls	2	0.03344	32.3411	0.851805	0.000206008	1.70742e-06
database_2016_09_25_Traj1_L.mat	E2_LT1D10.721F0001.xls	2	0.0403513	36.3327	0.927844	0.000166341	7.23027e-07
database_2016_09_25_Traj1_L.mat	E2_LT1D11.021F0001.xls	2	0.053712	53.3231	0.937911	0.000121531	2.46243e-07
database_2016_09_25_Traj1_L.mat	E2_LT1D11.322F0001.xls	2	0.0610832	51.589	0.793785	5.8466e-05	3.27505e-07
database_2016_09_25_Traj1_L.mat	E2_LT1D11.782F0001.xls	2	0.152346	156.543	0.651816	0.000604592	9.52304e-08
database_2016_09_25_Traj1_L.mat	E2_LT1D12.109F0001.xls	2	0.0821329	38.0472	0.939536	0.00023506	3.89229e-07
database_2016_09_25_Traj1_L.mat	E2_LT1D12.478F0001.xls	2	0.109265	136.011	0.72219	0.000490318	1.0405e-07
database_2016_09_25_Traj1_L.mat	E2_LT1D12.829F0001.xls	2	0.0827647	37.1699	0.975884	0.000162015	9.38451e-07
database_2016_09_25_Traj1_L.mat	E2_LT1D13.158F0001.xls	2	0.0616573	36.5992	0.899719	8.50182e-05	1.4646e-07
database_2016_09_25_Traj1_L.mat	E2_LT1D13.550F0001.xls	2	0.0314313	38.141	0.98104	8.74252e-05	1.15121e-06
database_2016_09_25_Traj1_L.mat	E2_LT1D13.830F0002.xls	2	0.032772	31.7547	0.958203	7.4598e-05	3.87163e-06
database_2016_09_25_Traj1_L.mat	E2_LT1D14.077F0001.xls	2	0.142381	148.714	0.692261	0.000619555	8.62303e-08
database_2016_09_25_Traj1_L.mat	E2_LT1D14.304F0001.xls	2	0.0893777	77.7643	0.88301	0.0017211	1.32231e-08
database_2016_09_25_Traj1_L.mat	E2_LT1D14.613F0001.xls	2	0.072088	40.292	0.834405	7.42724e-05	1.14099e-06
database_2016_09_25_Traj1_L.mat	E2_LT1D14.714F0001.xls	2	0.0472494	41.581	1.00658	8.86292e-05	2.86156e-06
database_2016_09_25_Traj1_L.mat	E2_LT1D14.796F0001.xls	2	0.0444464	38.3367	0.996723	8.69528e-05	3.95115e-06
database_2016_09_25_Traj1_L.mat	E2_LT1D14.899F0001.xls	2	0.0405349	39.8055	0.925837	8.80579e-05	7.18626e-06
database_2016_09_25_Traj1_L.mat	E2_LT1D15.000F0001.xls	2	0.0466666	55.1637	0.832263	9.1525e-05	1.0019e-06
database_2016_09_25_Traj1_L.mat	E1_LT1D11.021F0001.xls	3	0.0715522	63.3583	0.920922	0.000161635	1.00453e-07
database_2016_09_25_Traj1_L.mat	E1_LT1D11.322F0001.xls	3	0.0569702	57.2981	0.946901	9.24796e-05	2.06233e-07
database_2016_09_25_Traj1_L.mat	E1_LT1D11.782F0001.xls	3	0.999999	1.8669	0.636685	0.000179784	1.56982e-05
database_2016_09_25_Traj1_L.mat	E1_LT1D12.109F0001.xls	3	0.0394751	51.3212	0.825312	0.000152845	1.70974e-07
database_2016_09_25_Traj1_L.mat	E1_LT1D12.829F0001.xls	3	0.0635127	52.4125	0.930905	0.000175089	1.82088e-07
database_2016_09_25_Traj1_L.mat	E1_LT1D13.158F0001.xls	3	0.0646825	5.72727	1.12886	0.000220689	1.1753e-05
database_2016_09_25_Traj1_L.mat	E1_LT1D13.550F0001.xls	3	0.0462556	43.9248	0.969064	0.000130233	3.17972e-07
database_2016_09_25_Traj1_L.mat	E1_LT1D14.304F0001.xls	3	0.119615	117.986	0.781996	0.000897681	4.34126e-08
database_2016_09_25_Traj1_L.mat	E1_LT1D14.613F0001.xls	3	0.0473095	36.6176	0.898578	6.20211e-05	6.38497e-07
database_2016_09_25_Traj1_L.mat	E1_LT1D14.714F0001.xls	3	0.0590363	55.8246	0.842012	6.32595e-05	1.63928e-07
database_2016_09_25_Traj1_L.mat	E1_LT1D14.796F0001.xls	3	0.0373719	47.4724	0.965487	0.000116292	8.48998e-07
database_2016_09_25_Traj1_L.mat	E1_LT1D14.899F0001.xls	3	0.0503073	26.4164	0.903794	6.623e-05	3.47075e-06
database_2016_09_25_Traj1_L.mat	E1_LT1D15.000F0001.xls	3	0.0415342	45.2315	0.921413	9.15347e-05	2.59019e-07
database_2016_09_25_Traj1_L.mat	E2_LT1D10.364F0001.xls	3	0.0685655	40.1316	0.976244	7.41121e-05	1.26668e-06
database_2016_09_25_Traj1_L.mat	E2_LT1D10.565F0001.xls	3	0.743026	0.403004	0.976389	0.000206008	0.000445301
database_2016_09_25_Traj1_L.mat	E2_LT1D10.721F0001.xls	3	0.39097	2.5057	1.07925	0.000166341	3.3922e-06
database_2016_09_25_Traj1_L.mat	E2_LT1D11.021F0001.xls	3	0.0942036	23.2336	1.18621	0.000121531	3.93465e-07
database_2016_09_25_Traj1_L.mat	E2_LT1D11.322F0001.xls	3	0.0478319	56.2902	0.931701	5.8466e-05	1.9709e-07
database_2016_09_25_Traj1_L.mat	E2_LT1D12.109F0001.xls	3	0.0376774	44.2351	0.936812	0.00023506	4.81641e-07
database_2016_09_25_Traj1_L.mat	E2_LT1D12.829F0001.xls	3	0.0519533	60.0625	0.982197	0.000162015	4.25612e-07
database_2016_09_25_Traj1_L.mat	E2_LT1D13.158F0001.xls	3	0.0611016	45.1422	0.865107	8.50182e-05	1.87572e-07
database_2016_09_25_Traj1_L.mat	E2_LT1D13.550F0001.xls	3	0.0380565	30.3085	0.908499	8.74252e-05	5.04478e-07
database_2016_09_25_Traj1_L.mat	E2_LT1D13.830F0002.xls	3	0.0508592	25.3362	0.930322	7.4598e-05	9.98376e-06
database_2016_09_25_Traj1_L.mat	E2_LT1D14.613F0001.xls	3	0.0414325	49.4492	0.941652	7.42724e-05	1.25657e-06
database_2016_09_25_Traj1_L.mat	E2_LT1D14.714F0001.xls	3	0.0469382	29.3956	0.949104	8.86292e-05	2.12169e-06
database_2016_09_25_Traj1_L.mat	E2_LT1D14.796F0001.xls	3	0.0310846	24.0877	0.899201	8.69528e-05	8.12936e-06
database_2016_09_25_Traj1_L.mat	E2_LT1D14.899F0001.xls	3	0.0505834	34.6187	1.01524	8.80579e-05	3.54487e-06
database_2016_09_25_Traj1_L.mat	E2_LT1D15.000F0001.xls	3	0.0451055	47.2832	0.908332	9.1525e-05	6.48144e-07
database_2016_09_25_Traj1_L.mat	E1_LT1D11.782F0001.xls	4	0.0283513	37.9276	0.919005	0.000179784	1.58084e-06
database_2016_09_25_Traj1_L.mat	E1_LT1D12.829F0001.xls	4	0.0320131	42.6518	0.914243	0.000175089	3.00388e-07
database_2016_09_25_Traj1_L.mat	E1_LT1D13.158F0001.xls	4	0.0391932	42.3236	0.883127	0.000220689	2.02956e-06
database_2016_09_25_Traj1_L.mat	E1_LT1D14.613F0001.xls	4	0.033368	36.8792	0.879303	6.20211e-05	5.10937e-07
database_2016_09_25_Traj1_L.mat	E1_LT1D14.899F0001.xls	4	0.0221003	25.8133	0.890022	6.623e-05	3.51824e-06
database_2016_09_25_Traj1_L.mat	E2_LT1D10.364F0001.xls	4	0.0399654	40.0628	0.906831	7.41121e-05	1.2976e-06
database_2016_09_25_Traj1_L.mat	E2_LT1D10.565F0001.xls	4	0.0471402	35.6659	0.940285	0.000206008	2.32807e-06
database_2016_09_25_Traj1_L.mat	E2_LT1D10.721F0001.xls	4	0.0350925	31.663	1.0281	0.000166341	1.00414e-06
database_2016_09_25_Traj1_L.mat	E2_LT1D11.021F0001.xls	4	0.0471216	40.8969	0.9447	0.000121531	4.17788e-07
database_2016_09_25_Traj1_L.mat	E2_LT1D13.158F0001.xls	4	0.03615	36.308	0.928001	8.50182e-05	2.06811e-07
database_2016_09_25_Traj1_L.mat	E2_LT1D13.550F0001.xls	4	0.0264587	26.222	0.881169	8.74252e-05	8.25686e-07
database_2016_09_25_Traj1_L.mat	E2_LT1D13.830F0002.xls	4	0.0489638	34.964	0.96388	7.4598e-05	6.9266e-06
database_2016_09_25_Traj1_L.mat	E2_LT1D14.714F0001.xls	4	0.0271945	34.7974	1.02246	8.86292e-05	1.2861e-06
database_2016_09_25_Traj1_L.mat	E2_LT1D14.796F0001.xls	4	0.0286118	29.6855	1.03261	8.69528e-05	3.15234e-06
database_2016_09_25_Traj1_L.mat	E2_LT1D14.899F0001.xls	4	0.0435561	37.9961	0.879525	8.80579e-05	6.6671e-06
database_2016_09_25_Traj1_L.mat	E1_LT1D13.158F0001.xls	5	0.0273482	27.1803	0.936059	0.000220689	2.32564e-06
database_2016_09_25_Traj1_L.mat	E2_LT1D10.565F0001.xls	5	0.0406038	42.5169	0.881439	0.000206008	1.75794e-06
database_2016_09_25_Traj1_L.mat	E2_LT1D10.721F0001.xls	5	0.0327852	42.5969	0.90485	0.000166341	7.99318e-07
database_2016_09_25_Traj2_R.mat	E1_RT1D10.362F0001.xls	1	0.0841751	53.4156	0.917824	0.000220948	6.49597e-08
database_2016_09_25_Traj2_R.mat	E1_RT1D10.731F0001.xls	1	0.0339691	43.0795	0.926022	5.08048e-05	4.69269e-07
database_2016_09_25_Traj2_R.mat	E1_RT1D11.131F0001.xls	1	0.102252	116.668	0.74135	0.00255187	2.16945e-07
database_2016_09_25_Traj2_R.mat	E1_RT1D11.490F0001.xls	1	0.723564	3.62146	5.75566	0.000549994	3.72571e-06
database_2016_09_25_Traj2_R.mat	E1_RT1D11.862F0001.xls	1	0.3412	21.6207	1.84349	0.000178075	6.16165e-07
database_2016_09_25_Traj2_R.mat	E1_RT1D12.263F0001.xls	1	0.0499248	46.1495	0.928562	0.0001968	1.34215e-07
database_2016_09_25_Traj2_R.mat	E1_RT1D12.666F0001.xls	1	0.0788979	40.595	1.0107	9.52698e-05	1.8074e-07
database_2016_09_25_Traj2_R.mat	E1_RT1D13.057F0001.xls	1	0.0849489	83.4348	0.828204	0.0013176	2.10791e-09
database_2016_09_25_Traj2_R.mat	E1_RT1D13.380F0001.xls	1	0.45433	19.055	2.16405	0.000252756	2.12513e-07
database_2016_09_25_Traj2_R.mat	E1_RT1D13.714F0002.xls	1	0.707156	7.1215	3.07581	0.000540523	1.12234e-06
database_2016_09_25_Traj2_R.mat	E1_RT1D13.964F0003.xls	1	0.0454637	47.6837	0.980414	8.57925e-05	7.8296e-08
database_2016_09_25_Traj2_R.mat	E1_RT1D14.048F0001.xls	1	0.0952365	70.5939	0.910151	0.000190329	1.63205e-07
database_2016_09_25_Traj2_R.mat	E1_RT1D14.307F0001.xls	1	0.486518	29.0106	0.75177	0.000208172	1.00775e-07
database_2016_09_25_Traj2_R.mat	E1_RT1D14.595F0001.xls	1	0.0618554	59.3968	0.852188	0.000142222	9.72844e-08
database_2016_09_25_Traj2_R.mat	E1_RT1D14.696F0001.xls	1	0.552909	28.634	1.75785	0.000925453	4.07293e-07
database_2016_09_25_Traj2_R.mat	E1_RT1D14.897F0002.xls	1	0.707201	17.8135	1.30633	0.00101916	5.82349e-08
database_2016_09_25_Traj2_R.mat	E1_RT1D14.999F0001.xls	1	0.0416263	42.7443	0.903528	7.48169e-05	7.37861e-08
database_2016_09_25_Traj2_R.mat	E1_RT1D9.712F0001.xls	1	0.0382611	53.2032	0.874935	6.88357e-05	2.55929e-07
database_2016_09_25_Traj2_R.mat	E2_RT1D10.362F0001.xls	1	0.111945	63.8306	0.863436	0.000406461	1.53269e-07
database_2016_09_25_Traj2_R.mat	E2_RT1D10.731F0001.xls	1	0.0456877	37.2235	0.888806	0.000266603	5.92909e-08
database_2016_09_25_Traj2_R.mat	E2_RT1D11.131F0001.xls	1	0.0295513	31.2097	0.984601	0.00200069	4.67869e-07
database_2016_09_25_Traj2_R.mat	E2_RT1D11.490F0001.xls	1	0.0385055	33.3375	0.958566	0.000155258	7.6367e-07
database_2016_09_25_Traj2_R.mat	E2_RT1D11.862F0001.xls	1	0.0419576	46.3236	0.888004	8.47066e-05	4.81833e-07
database_2016_09_25_Traj2_R.mat	E2_RT1D12.263F0001.xls	1	0.0710085	58.5026	0.929845	0.000160297	3.38623e-07
database_2016_09_25_Traj2_R.mat	E2_RT1D12.666F0001.xls	1	0.0717321	32.5884	0.947568	0.000208068	1.6317e-07
database_2016_09_25_Traj2_R.mat	E2_RT1D13.057F0001.xls	1	0.0332883	32.2614	1.00629	0.000111044	2.4332e-07
database_2016_09_25_Traj2_R.mat	E2_RT1D13.380F0001.xls	1	0.0610286	57.4853	0.894874	0.000564583	1.06609e-08
database_2016_09_25_Traj2_R.mat	E2_RT1D13.714F0002.xls	1	0.0613621	44.3039	0.843759	0.000147073	2.96017e-07
database_2016_09_25_Traj2_R.mat	E2_RT1D13.964F0003.xls	1	0.104983	103.79	0.76185	0.000264249	1.21179e-08
database_2016_09_25_Traj2_R.mat	E2_RT1D14.048F0001.xls	1	0.110519	95.7241	0.951097	0.00433998	7.13079e-09
database_2016_09_25_Traj2_R.mat	E2_RT1D14.307F0001.xls	1	0.0457068	28.9439	0.96056	9.70778e-05	1.19776e-07
database_2016_09_25_Traj2_R.mat	E2_RT1D14.595F0001.xls	1	0.66268	2.54641	1.07063	0.000459518	2.50681e-06
database_2016_09_25_Traj2_R.mat	E2_RT1D14.696F0001.xls	1	0.082526	53.545	0.962252	7.2826e-05	7.32403e-08
database_2016_09_25_Traj2_R.mat	E2_RT1D14.797F0001.xls	1	0.0701197	54.268	0.986868	6.86403e-05	3.42589e-07
database_2016_09_25_Traj2_R.mat	E2_RT1D14.897F0002.xls	1	0.0578716	56.0936	0.831989	8.85095e-05	1.08694e-08
database_2016_09_25_Traj2_R.mat	E2_RT1D14.999F0001.xls	1	0.0373891	47.4473	0.933206	8.74668e-05	6.97931e-08
database_2016_09_25_Traj2_R.mat	E1_RT1D10.362F0001.xls	2	0.0554324	61.0273	0.905897	0.000220948	2.602e-07
database_2016_09_25_Traj2_R.mat	E1_RT1D10.731F0001.xls	2	0.0464733	36.5006	0.972186	5.08048e-05	3.56939e-07
database_2016_09_25_Traj2_R.mat	E1_RT1D11.490F0001.xls	2	0.0861904	95.6219	0.787184	0.000549994	1.59484e-07
database_2016_09_25_Traj2_R.mat	E1_RT1D11.862F0001.xls	2	0.105574	95.1112	0.855735	0.000178075	1.53504e-07
database_2016_09_25_Traj2_R.mat	E1_RT1D12.263F0001.xls	2	0.420044	1.98001	1.82623	0.0001968	4.07499e-06
database_2016_09_25_Traj2_R.mat	E1_RT1D12.666F0001.xls	2	0.0566625	50.6373	0.937212	9.52698e-05	2.96306e-07
database_2016_09_25_Traj2_R.mat	E1_RT1D13.057F0001.xls	2	0.310925	18.3134	1.36561	0.0013176	2.50127e-08
database_2016_09_25_Traj2_R.mat	E1_RT1D13.380F0001.xls	2	0.100433	100.625	0.816865	0.000252756	6.94097e-08
database_2016_09_25_Traj2_R.mat	E1_RT1D13.714F0002.xls	2	0.116253	91.4773	0.825838	0.000540523	9.4674e-08
database_2016_09_25_Traj2_R.mat	E1_RT1D13.964F0003.xls	2	0.0696561	76.1585	0.879959	8.57925e-05	3.11116e-08
database_2016_09_25_Traj2_R.mat	E1_RT1D14.048F0001.xls	2	0.381813	4.51338	1.03251	0.000190329	1.26479e-06
database_2016_09_25_Traj2_R.mat	E1_RT1D14.307F0001.xls	2	0.106645	104.49	0.808379	0.000208172	5.72065e-08
database_2016_09_25_Traj2_R.mat	E1_RT1D14.595F0001.xls	2	0.082653	50.5224	0.933552	0.000142222	6.90278e-08
database_2016_09_25_Traj2_R.mat	E1_RT1D14.696F0001.xls	2	0.063852	51.1054	0.884781	0.000925453	9.16138e-08
database_2016_09_25_Traj2_R.mat	E1_RT1D14.897F0002.xls	2	0.159723	144.997	0.688721	0.00101916	8.21175e-09
database_2016_09_25_Traj2_R.mat	E1_RT1D14.999F0001.xls	2	0.0509366	32.0212	0.900536	7.48169e-05	7.47174e-08
database_2016_09_25_Traj2_R.mat	E1_RT1D9.712F0001.xls	2	0.0480149	41.0614	1.0215	6.88357e-05	1.99524e-07
database_2016_09_25_Traj2_R.mat	E2_RT1D10.362F0001.xls	2	0.105111	3.73903	1.52594	0.000406461	4.8071e-07
database_2016_09_25_Traj2_R.mat	E2_RT1D10.731F0001.xls	2	0.0411982	26.4799	0.969732	0.000266603	5.77474e-08
database_2016_09_25_Traj2_R.mat	E2_RT1D11.131F0001.xls	2	0.688618	2.26627	4.277	0.00200069	1.218e-05
database_2016_09_25_Traj2_R.mat	E2_RT1D11.490F0001.xls	2	0.0401384	19.171	0.957935	0.000155258	1.0869e-06
database_2016_09_25_Traj2_R.mat	E2_RT1D11.862F0001.xls	2	0.0579915	41.6715	0.927884	8.47066e-05	5.61144e-07
database_2016_09_25_Traj2_R.mat	E2_RT1D12.263F0001.xls	2	0.0943388	55.5318	0.950208	0.000160297	2.42685e-07
database_2016_09_25_Traj2_R.mat	E2_RT1D12.666F0001.xls	2	0.813385	1.957	2.02524	0.000208068	3.29913e-06
database_2016_09_25_Traj2_R.mat	E2_RT1D13.057F0001.xls	2	0.0555185	33.5023	0.940482	0.000111044	1.88336e-07
database_2016_09_25_Traj2_R.mat	E2_RT1D13.380F0001.xls	2	0.0913344	60.6876	0.876689	0.000564583	8.21241e-09
database_2016_09_25_Traj2_R.mat	E2_RT1D13.714F0002.xls	2	0.0918864	27.3617	1.02484	0.000147073	7.92161e-07
database_2016_09_25_Traj2_R.mat	E2_RT1D14.048F0001.xls	2	0.857787	1.50473	0.733433	0.00433998	1.19489e-06
database_2016_09_25_Traj2_R.mat	E2_RT1D14.307F0001.xls	2	0.0572134	33.5515	0.929937	9.70778e-05	1.85862e-07
database_2016_09_25_Traj2_R.mat	E2_RT1D14.595F0001.xls	2	0.0939681	114.676	0.786396	0.000459518	4.74202e-08
database_2016_09_25_Traj2_R.mat	E2_RT1D14.696F0001.xls	2	0.0561589	62.0311	0.869098	7.2826e-05	2.67824e-08
database_2016_09_25_Traj2_R.mat	E2_RT1D14.797F0001.xls	2	0.0529067	31.2342	0.965818	6.86403e-05	3.96785e-07
database_2016_09_25_Traj2_R.mat	E2_RT1D14.897F0002.xls	2	0.0554574	52.2021	0.948679	8.85095e-05	2.26113e-08
database_2016_09_25_Traj2_R.mat	E2_RT1D14.999F0001.xls	2	0.0448043	41.0175	0.861302	8.74668e-05	5.33876e-08
database_2016_09_25_Traj2_R.mat	E1_RT1D10.362F0001.xls	3	0.111834	18.6954	1.25605	0.000220948	1.17123e-07
database_2016_09_25_Traj2_R.mat	E1_RT1D10.731F0001.xls	3	0.0550757	47.0648	0.917952	5.08048e-05	3.08988e-07
database_2016_09_25_Traj2_R.mat	E1_RT1D12.263F0001.xls	3	0.0463221	45.5403	0.969602	0.0001968	1.60095e-07
database_2016_09_25_Traj2_R.mat	E1_RT1D12.666F0001.xls	3	0.351461	2.80846	3.85587	9.52698e-05	4.85531e-06
database_2016_09_25_Traj2_R.mat	E1_RT1D13.057F0001.xls	3	0.0161611	12.6642	1.18796	0.0013176	1.38579e-07
database_2016_09_25_Traj2_R.mat	E1_RT1D14.048F0001.xls	3	0.0572691	42.2406	0.938712	0.000190329	3.85593e-07
database_2016_09_25_Traj2_R.mat	E1_RT1D14.595F0001.xls	3	0.0586967	59.3089	0.953319	0.000142222	8.949e-08
database_2016_09_25_Traj2_R.mat	E1_RT1D14.696F0001.xls	3	0.166597	20.8179	1.07714	0.000925453	2.81389e-07
database_2016_09_25_Traj2_R.mat	E1_RT1D14.999F0001.xls	3	0.0509004	40.7476	0.848465	7.48169e-05	7.70604e-08
database_2016_09_25_Traj2_R.mat	E1_RT1D9.712F0001.xls	3	0.0522771	23.5109	0.92165	6.88357e-05	3.96754e-07
database_2016_09_25_Traj2_R.mat	E2_RT1D10.362F0001.xls	3	0.0563429	57.955	0.845942	0.000406461	1.72461e-07
database_2016_09_25_Traj2_R.mat	E2_RT1D10.731F0001.xls	3	0.0958928	6.13019	2.27837	0.000266603	3.49305e-07
database_2016_09_25_Traj2_R.mat	E2_RT1D11.131F0001.xls	3	0.112919	17.2236	1.08317	0.00200069	3.68883e-07
database_2016_09_25_Traj2_R.mat	E2_RT1D11.490F0001.xls	3	0.0621106	34.1844	1.00886	0.000155258	9.82448e-07
database_2016_09_25_Traj2_R.mat	E2_RT1D11.862F0001.xls	3	0.0598172	51.3717	0.882366	8.47066e-05	3.2326e-07
database_2016_09_25_Traj2_R.mat	E2_RT1D12.263F0001.xls	3	0.050904	62.6161	0.921703	0.000160297	1.48408e-07
database_2016_09_25_Traj2_R.mat	E2_RT1D12.666F0001.xls	3	0.0427721	31.5673	0.896682	0.000208068	2.17073e-07
database_2016_09_25_Traj2_R.mat	E2_RT1D13.057F0001.xls	3	0.0777904	23.7618	1.02851	0.000111044	3.26971e-07
database_2016_09_25_Traj2_R.mat	E2_RT1D13.380F0001.xls	3	0.0635152	58.4225	0.914662	0.000564583	3.14457e-09
database_2016_09_25_Traj2_R.mat	E2_RT1D13.714F0002.xls	3	0.0478022	47.777	0.925958	0.000147073	1.32084e-07
database_2016_09_25_Traj2_R.mat	E2_RT1D14.307F0001.xls	3	0.0286099	31.0855	0.969811	9.70778e-05	8.08051e-08
database_2016_09_25_Traj2_R.mat	E2_RT1D14.696F0001.xls	3	0.0472514	64.1338	0.897151	7.2826e-05	4.57011e-08
database_2016_09_25_Traj2_R.mat	E2_RT1D14.797F0001.xls	3	0.044419	49.5648	0.861152	6.86403e-05	3.78899e-07
database_2016_09_25_Traj2_R.mat	E2_RT1D14.897F0002.xls	3	0.0511504	56.5143	0.944105	8.85095e-05	1.82724e-08
database_2016_09_25_Traj2_R.mat	E2_RT1D14.999F0001.xls	3	0.062366	35.9181	0.923657	8.74668e-05	8.37631e-08
database_2016_09_25_Traj2_R.mat	E1_RT1D10.362F0001.xls	4	0.0264495	27.509	1.07045	0.000220948	5.55903e-08
database_2016_09_25_Traj2_R.mat	E1_RT1D10.731F0001.xls	4	0.0250444	33.5274	0.990147	5.08048e-05	9.54594e-07
database_2016_09_25_Traj2_R.mat	E1_RT1D12.263F0001.xls	4	0.0342941	42.1134	0.999535	0.0001968	1.14714e-07
database_2016_09_25_Traj2_R.mat	E1_RT1D12.666F0001.xls	4	0.0423761	45.4459	0.899301	9.52698e-05	3.73617e-07
database_2016_09_25_Traj2_R.mat	E1_RT1D14.696F0001.xls	4	0.74279	17.3608	2.53703	0.000925453	1.95464e-07
database_2016_09_25_Traj2_R.mat	E1_RT1D14.999F0001.xls	4	0.0310188	26.6967	1.01007	7.48169e-05	1.43562e-07
database_2016_09_25_Traj2_R.mat	E1_RT1D9.712F0001.xls	4	0.0276001	35.6527	0.841037	6.88357e-05	2.84938e-07
database_2016_09_25_Traj2_R.mat	E2_RT1D10.362F0001.xls	4	0.0682008	41.797	0.860518	0.000406461	6.62036e-08
database_2016_09_25_Traj2_R.mat	E2_RT1D10.731F0001.xls	4	0.0339994	23.1936	0.923128	0.000266603	8.65724e-08
database_2016_09_25_Traj2_R.mat	E2_RT1D11.131F0001.xls	4	0.0413003	29.591	0.939304	0.00200069	4.13544e-07
database_2016_09_25_Traj2_R.mat	E2_RT1D11.490F0001.xls	4	0.0263289	25.3304	0.965071	0.000155258	1.0518e-06
database_2016_09_25_Traj2_R.mat	E2_RT1D11.862F0001.xls	4	0.0382239	36.4254	0.997908	8.47066e-05	1.37e-06
database_2016_09_25_Traj2_R.mat	E2_RT1D12.666F0001.xls	4	0.0521874	45.4365	0.911877	0.000208068	1.67111e-07
database_2016_09_25_Traj2_R.mat	E2_RT1D13.057F0001.xls	4	0.0508893	24.134	0.889168	0.000111044	3.45817e-07
database_2016_09_25_Traj2_R.mat	E2_RT1D13.380F0001.xls	4	0.398134	0.663892	1.90421	0.000564583	2.55216e-06
database_2016_09_25_Traj2_R.mat	E2_RT1D13.714F0002.xls	4	0.0291407	31.2584	1.03765	0.000147073	4.6351e-07
database_2016_09_25_Traj2_R.mat	E2_RT1D14.307F0001.xls	4	0.0360626	39.9114	0.883451	9.70778e-05	9.50653e-08
database_2016_09_25_Traj2_R.mat	E2_RT1D14.797F0001.xls	4	0.0273337	36.5404	1.01324	6.86403e-05	2.99608e-07
database_2016_09_25_Traj2_R.mat	E2_RT1D14.999F0001.xls	4	0.030782	35.5485	0.938297	8.74668e-05	5.16893e-08
database_2016_09_25_Traj2_R.mat	E2_RT1D10.731F0001.xls	5	0.0352584	34.8852	0.919947	0.000266603	7.12122e-08
database_2016_11_16_Traj1_R.mat	E1_RT1D10.764F0001.xls	1	0.0522034	49.7472	0.875384	7.45413e-05	1.95273e-07
database_2016_11_16_Traj1_R.mat	E1_RT1D10.964F0001.xls	1	0.0470303	37.2343	0.858915	6.25953e-05	3.56002e-07
database_2016_11_16_Traj1_R.mat	E1_RT1D11.164F0001.xls	1	0.0426484	55.1464	0.935544	5.71496e-05	6.88197e-07
database_2016_11_16_Traj1_R.mat	E1_RT1D11.365F0001.xls	1	0.0453716	45.4784	0.924202	0.000666006	7.2474e-07
database_2016_11_16_Traj1_R.mat	E1_RT1D11.564F0002.xls	1	0.0384689	39.3562	0.891234	5.6758e-05	1.78143e-07
database_2016_11_16_Traj1_R.mat	E1_RT1D11.605F0002.xls	1	0.0249335	36.5925	0.925424	6.43392e-05	1.83758e-06
database_2016_11_16_Traj1_R.mat	E1_RT1D11.651F0001.xls	1	0.0355888	35.8317	0.94413	5.46975e-05	7.91151e-08
database_2016_11_16_Traj1_R.mat	E1_RT1D11.851F0002.xls	1	0.0311672	36.1984	0.921196	6.49922e-05	7.13714e-07
database_2016_11_16_Traj1_R.mat	E1_RT1D12.017F0001.xls	1	0.053105	40.6853	0.895676	5.39138e-05	5.45366e-08
database_2016_11_16_Traj1_R.mat	E1_RT1D12.218F0001.xls	1	0.0602928	46.8924	0.906562	6.71957e-05	3.05742e-07
database_2016_11_16_Traj1_R.mat	E1_RT1D12.419F0001.xls	1	0.0410319	38.0234	0.965674	6.67457e-05	7.98416e-07
database_2016_11_16_Traj1_R.mat	E1_RT1D12.620F0001.xls	1	0.755198	24.6358	0.874126	0.000226253	1.02134e-07
database_2016_11_16_Traj1_R.mat	E1_RT1D12.821F0001.xls	1	0.0399209	38.5336	0.906792	5.98458e-05	3.00637e-07
database_2016_11_16_Traj1_R.mat	E1_RT1D13.022F0001.xls	1	0.0434464	48.5965	0.87881	5.92687e-05	9.59735e-07
database_2016_11_16_Traj1_R.mat	E1_RT1D13.222F0001.xls	1	0.0313711	36.0264	0.950483	8.36403e-05	1.31055e-07
database_2016_11_16_Traj1_R.mat	E1_RT1D13.417F0001.xls	1	0.750273	19.5119	1.4142	0.00028127	3.32464e-08
database_2016_11_16_Traj1_R.mat	E1_RT1D13.617F0001.xls	1	0.0688012	44.1697	0.917411	5.97686e-05	1.09312e-07
database_2016_11_16_Traj1_R.mat	E1_RT1D13.818F0002.xls	1	0.0457482	39.5304	0.979033	5.8962e-05	4.24766e-07
database_2016_11_16_Traj1_R.mat	E1_RT1D13.958F0001.xls	1	0.0445756	36.8879	0.900964	5.50819e-05	6.26959e-07
database_2016_11_16_Traj1_R.mat	E1_RT1D14.077F0001.xls	1	0.0835738	57.1143	0.848057	4.42634e-05	6.30578e-07
database_2016_11_16_Traj1_R.mat	E1_RT1D14.209F0001.xls	1	0.0381909	37.3734	0.80035	6.5325e-05	8.57162e-07
database_2016_11_16_Traj1_R.mat	E1_RT1D14.341F0001.xls	1	0.0396876	38.0903	0.937124	5.68193e-05	3.79736e-08
database_2016_11_16_Traj1_R.mat	E1_RT1D14.594F0001.xls	1	0.039634	36.3422	1.00239	5.50492e-05	9.53529e-07
database_2016_11_16_Traj1_R.mat	E1_RT1D14.696F0001.xls	1	0.0299956	28.3473	0.907945	4.99869e-05	4.81104e-07
database_2016_11_16_Traj1_R.mat	E1_RT1D14.796F0001.xls	1	0.0952388	120.172	0.727103	0.00013751	4.31669e-07
database_2016_11_16_Traj1_R.mat	E1_RT1D14.896F0001.xls	1	0.08242	96.6245	0.774057	0.000318106	1.12473e-06
database_2016_11_16_Traj1_R.mat	E2_RT1D11.651F0001.xls	1	0.33819	61.8929	0.748442	0.000124043	4.04078e-08
database_2016_11_16_Traj1_R.mat	E2_RT1D11.851F0002.xls	1	0.0638515	48.3213	0.906786	6.03051e-05	3.7043e-07
database_2016_11_16_Traj1_R.mat	E2_RT1D12.017F0001.xls	1	0.0316817	35.009	0.901633	4.53235e-05	1.43643e-07
database_2016_11_16_Traj1_R.mat	E2_RT1D12.218F0001.xls	1	0.0424285	44.7009	0.944667	4.46763e-05	1.47013e-07
database_2016_11_16_Traj1_R.mat	E2_RT1D12.419F0001.xls	1	0.0207218	28.0472	0.873085	5.02556e-05	2.06504e-07
database_2016_11_16_Traj1_R.mat	E2_RT1D12.620F0001.xls	1	0.0487195	52.027	0.889532	4.69501e-05	2.14061e-08
database_2016_11_16_Traj1_R.mat	E2_RT1D12.821F0001.xls	1	0.0360445	45.4892	0.920244	5.90584e-05	6.06314e-08
database_2016_11_16_Traj1_R.mat	E2_RT1D13.022F0001.xls	1	0.0324563	39.9536	0.929136	6.23851e-05	7.16819e-08
database_2016_11_16_Traj1_R.mat	E2_RT1D13.222F0001.xls	1	0.0554574	44.6859	0.916948	5.931e-05	2.81672e-08
database_2016_11_16_Traj1_R.mat	E2_RT1D13.417F0001.xls	1	0.0506853	53.7236	0.917125	0.000128499	4.15073e-08
database_2016_11_16_Traj1_R.mat	E2_RT1D13.617F0001.xls	1	0.0357031	46.6175	0.84238	5.51315e-05	2.01387e-07
database_2016_11_16_Traj1_R.mat	E2_RT1D13.818F0002.xls	1	0.0444385	52.8677	0.879381	4.41672e-05	3.33972e-07
database_2016_11_16_Traj1_R.mat	E2_RT1D13.958F0001.xls	1	0.0377264	33.7199	0.878218	4.79105e-05	4.37408e-07
database_2016_11_16_Traj1_R.mat	E2_RT1D14.077F0001.xls	1	0.0470998	43.2429	0.913188	5.25505e-05	6.03812e-07
database_2016_11_16_Traj1_R.mat	E2_RT1D14.209F0001.xls	1	0.0324088	29.3011	0.910893	7.28237e-05	5.67289e-07
database_2016_11_16_Traj1_R.mat	E2_RT1D14.341F0001.xls	1	0.0509444	54.6257	0.870471	5.36435e-05	1.85572e-07
database_2016_11_16_Traj1_R.mat	E2_RT1D14.594F0001.xls	1	0.0424622	47.5316	1.00511	6.09921e-05	1.21419e-06
database_2016_11_16_Traj1_R.mat	E2_RT1D14.696F0001.xls	1	0.0460803	41.1809	0.929476	5.59318e-05	1.00781e-06
database_2016_11_16_Traj1_R.mat	E2_RT1D14.796F0001.xls	1	0.0486975	41.1524	0.925408	5.26446e-05	1.41773e-06
database_2016_11_16_Traj1_R.mat	E2_RT1D14.896F0001.xls	1	0.0426847	40.2453	1.0039	8.92971e-05	1.15593e-07
database_2016_11_16_Traj1_R.mat	E1_RT1D10.764F0001.xls	2	0.0661146	44.8965	0.924992	7.45413e-05	2.54914e-07
database_2016_11_16_Traj1_R.mat	E1_RT1D10.964F0001.xls	2	0.0418411	36.0651	0.934202	6.25953e-05	3.20343e-07
database_2016_11_16_Traj1_R.mat	E1_RT1D11.164F0001.xls	2	0.0450651	34.6432	1.03811	5.71496e-05	6.09595e-07
database_2016_11_16_Traj1_R.mat	E1_RT1D11.365F0001.xls	2	0.0499709	41.4139	0.952391	0.000666006	9.59024e-07
database_2016_11_16_Traj1_R.mat	E1_RT1D11.564F0002.xls	2	0.0497151	44.6151	0.917319	5.6758e-05	2.9388e-07
database_2016_11_16_Traj1_R.mat	E1_RT1D11.605F0002.xls	2	0.0404782	26.0297	1.07907	6.43392e-05	1.96735e-06
database_2016_11_16_Traj1_R.mat	E1_RT1D11.651F0001.xls	2	0.0315011	28.3204	0.978464	5.46975e-05	8.73877e-08
database_2016_11_16_Traj1_R.mat	E1_RT1D11.851F0002.xls	2	0.0391187	30.3161	1.00292	6.49922e-05	9.17896e-07
database_2016_11_16_Traj1_R.mat	E1_RT1D12.017F0001.xls	2	0.0358816	35.1327	0.974228	5.39138e-05	6.10515e-08
database_2016_11_16_Traj1_R.mat	E1_RT1D12.218F0001.xls	2	0.0411572	44.0827	0.88093	6.71957e-05	2.53448e-07
database_2016_11_16_Traj1_R.mat	E1_RT1D12.419F0001.xls	2	0.0509391	44.1743	0.930455	6.67457e-05	6.2592e-07
database_2016_11_16_Traj1_R.mat	E1_RT1D12.620F0001.xls	2	0.0965428	117.747	0.761511	0.000226253	1.86374e-08
database_2016_11_16_Traj1_R.mat	E1_RT1D12.821F0001.xls	2	0.0287377	33.0643	0.807154	5.98458e-05	2.85978e-07
database_2016_11_16_Traj1_R.mat	E1_RT1D13.022F0001.xls	2	0.0522551	47.8963	0.99015	5.92687e-05	1.25963e-06
database_2016_11_16_Traj1_R.mat	E1_RT1D13.222F0001.xls	2	0.0257037	30.9911	0.905203	8.36403e-05	1.80366e-07
database_2016_11_16_Traj1_R.mat	E1_RT1D13.417F0001.xls	2	0.0895324	114.281	0.770668	0.00028127	4.69899e-09
database_2016_11_16_Traj1_R.mat	E1_RT1D13.617F0001.xls	2	0.0387966	40.2072	0.967761	5.97686e-05	1.04612e-07
database_2016_11_16_Traj1_R.mat	E1_RT1D13.818F0002.xls	2	0.0462187	40.7542	0.928328	5.8962e-05	4.15894e-07
database_2016_11_16_Traj1_R.mat	E1_RT1D13.958F0001.xls	2	0.0369182	40.0579	0.823429	5.50819e-05	6.99329e-07
database_2016_11_16_Traj1_R.mat	E1_RT1D14.077F0001.xls	2	0.0648656	72.2487	0.866384	4.42634e-05	7.18774e-07
database_2016_11_16_Traj1_R.mat	E1_RT1D14.209F0001.xls	2	0.0272228	27.2725	0.837227	6.5325e-05	7.90409e-07
database_2016_11_16_Traj1_R.mat	E1_RT1D14.341F0001.xls	2	0.0535953	37.0444	1.02259	5.68193e-05	1.13733e-07
database_2016_11_16_Traj1_R.mat	E1_RT1D14.594F0001.xls	2	0.0267652	20.3516	0.913926	5.50492e-05	1.18096e-06
database_2016_11_16_Traj1_R.mat	E1_RT1D14.696F0001.xls	2	0.0691681	32.6351	0.888517	4.99869e-05	3.56758e-07
database_2016_11_16_Traj1_R.mat	E1_RT1D14.796F0001.xls	2	0.628575	9.64343	0.704755	0.00013751	8.81999e-07
database_2016_11_16_Traj1_R.mat	E1_RT1D14.896F0001.xls	2	0.822753	15.0143	1.09861	0.000318106	2.26488e-06
database_2016_11_16_Traj1_R.mat	E2_RT1D11.651F0001.xls	2	0.076173	69.1361	0.887862	0.000124043	4.89796e-08
database_2016_11_16_Traj1_R.mat	E2_RT1D11.851F0002.xls	2	0.0387666	47.8683	0.930826	6.03051e-05	3.79092e-07
database_2016_11_16_Traj1_R.mat	E2_RT1D12.017F0001.xls	2	0.0309424	37.7331	0.865451	4.53235e-05	1.89424e-07
database_2016_11_16_Traj1_R.mat	E2_RT1D12.218F0001.xls	2	0.0507823	42.6646	0.923156	4.46763e-05	1.53726e-07
database_2016_11_16_Traj1_R.mat	E2_RT1D12.419F0001.xls	2	0.0247996	26.8359	1.00319	5.02556e-05	2.42521e-07
database_2016_11_16_Traj1_R.mat	E2_RT1D12.620F0001.xls	2	0.0376816	41.3723	0.882905	4.69501e-05	3.18769e-08
database_2016_11_16_Traj1_R.mat	E2_RT1D12.821F0001.xls	2	0.0581508	47.105	0.945454	5.90584e-05	7.69413e-08
database_2016_11_16_Traj1_R.mat	E2_RT1D13.022F0001.xls	2	0.0441291	32.6638	0.9121	6.23851e-05	1.23872e-07
database_2016_11_16_Traj1_R.mat	E2_RT1D13.222F0001.xls	2	0.0214011	36.0486	0.913178	5.931e-05	4.45976e-08
database_2016_11_16_Traj1_R.mat	E2_RT1D13.417F0001.xls	2	0.0473941	47.997	0.905158	0.000128499	4.21745e-08
database_2016_11_16_Traj1_R.mat	E2_RT1D13.617F0001.xls	2	0.0289627	31.6999	0.912962	5.51315e-05	1.28845e-07
database_2016_11_16_Traj1_R.mat	E2_RT1D13.818F0002.xls	2	0.0316217	46.3816	0.877351	4.41672e-05	3.07108e-07
database_2016_11_16_Traj1_R.mat	E2_RT1D13.958F0001.xls	2	0.0309088	35.7373	0.958093	4.79105e-05	3.67982e-07
database_2016_11_16_Traj1_R.mat	E2_RT1D14.077F0001.xls	2	0.0430386	59.6392	0.898124	5.25505e-05	4.89422e-07
database_2016_11_16_Traj1_R.mat	E2_RT1D14.209F0001.xls	2	0.0307249	34.3531	0.983756	7.28237e-05	5.93871e-07
database_2016_11_16_Traj1_R.mat	E2_RT1D14.341F0001.xls	2	0.0727846	58.8076	0.859512	5.36435e-05	2.15033e-07
database_2016_11_16_Traj1_R.mat	E2_RT1D14.594F0001.xls	2	0.0583095	48.738	0.872826	6.09921e-05	1.09565e-06
database_2016_11_16_Traj1_R.mat	E2_RT1D14.696F0001.xls	2	0.0258384	27.8507	0.972746	5.59318e-05	8.72898e-07
database_2016_11_16_Traj1_R.mat	E2_RT1D14.796F0001.xls	2	0.0290153	32.2812	0.955395	5.26446e-05	1.43417e-06
database_2016_11_16_Traj1_R.mat	E2_RT1D14.896F0001.xls	2	0.034846	47.2761	0.836785	8.92971e-05	1.64841e-07
database_2016_11_16_Traj1_R.mat	E1_RT1D10.764F0001.xls	3	0.0405278	44.5581	0.882692	7.45413e-05	4.3442e-07
database_2016_11_16_Traj1_R.mat	E1_RT1D10.964F0001.xls	3	0.0540846	25.5424	0.932275	6.25953e-05	6.69392e-07
database_2016_11_16_Traj1_R.mat	E1_RT1D11.164F0001.xls	3	0.0503317	43.6929	0.922192	5.71496e-05	6.03198e-07
database_2016_11_16_Traj1_R.mat	E1_RT1D11.365F0001.xls	3	0.0239578	22.1899	0.920295	0.000666006	1.37962e-06
database_2016_11_16_Traj1_R.mat	E1_RT1D11.564F0002.xls	3	0.0532651	41.9008	0.921101	5.6758e-05	1.93687e-07
database_2016_11_16_Traj1_R.mat	E1_RT1D11.605F0002.xls	3	0.0704684	30.9338	0.859796	6.43392e-05	4.121e-06
database_2016_11_16_Traj1_R.mat	E1_RT1D11.651F0001.xls	3	0.0425504	37.5179	0.990192	5.46975e-05	1.02022e-07
database_2016_11_16_Traj1_R.mat	E1_RT1D11.851F0002.xls	3	0.069116	40.7231	0.888101	6.49922e-05	6.70702e-07
database_2016_11_16_Traj1_R.mat	E1_RT1D12.017F0001.xls	3	0.0316981	25.1381	0.91153	5.39138e-05	9.0251e-08
database_2016_11_16_Traj1_R.mat	E1_RT1D12.218F0001.xls	3	0.0355651	24.2213	0.880719	6.71957e-05	3.08503e-07
database_2016_11_16_Traj1_R.mat	E1_RT1D12.419F0001.xls	3	0.0245404	31.593	0.894738	6.67457e-05	8.84859e-07
database_2016_11_16_Traj1_R.mat	E1_RT1D12.821F0001.xls	3	0.0339546	34.3073	0.901934	5.98458e-05	3.9263e-07
database_2016_11_16_Traj1_R.mat	E1_RT1D13.022F0001.xls	3	0.0330557	51.1174	0.95717	5.92687e-05	7.04494e-07
database_2016_11_16_Traj1_R.mat	E1_RT1D13.222F0001.xls	3	0.083025	12.828	1.1423	8.36403e-05	5.42435e-07
database_2016_11_16_Traj1_R.mat	E1_RT1D13.617F0001.xls	3	0.0434493	32.7485	0.958322	5.97686e-05	1.97456e-07
database_2016_11_16_Traj1_R.mat	E1_RT1D13.818F0002.xls	3	0.0218155	22.0293	0.950095	5.8962e-05	4.87625e-07
database_2016_11_16_Traj1_R.mat	E1_RT1D13.958F0001.xls	3	0.0340088	39.4815	0.938771	5.50819e-05	4.31067e-07
database_2016_11_16_Traj1_R.mat	E1_RT1D14.209F0001.xls	3	0.0284177	25.6563	0.916892	6.5325e-05	9.33677e-07
database_2016_11_16_Traj1_R.mat	E1_RT1D14.341F0001.xls	3	0.0352629	35.1268	0.939482	5.68193e-05	7.51724e-08
database_2016_11_16_Traj1_R.mat	E1_RT1D14.594F0001.xls	3	0.0201232	9.69126	0.963567	5.50492e-05	1.44797e-06
database_2016_11_16_Traj1_R.mat	E1_RT1D14.696F0001.xls	3	0.0324071	23.8213	0.965753	4.99869e-05	1.14125e-06
database_2016_11_16_Traj1_R.mat	E1_RT1D14.896F0001.xls	3	0.696705	13.5613	0.643839	0.000318106	2.07619e-06
database_2016_11_16_Traj1_R.mat	E2_RT1D11.851F0002.xls	3	0.0466787	35.3349	0.894691	6.03051e-05	3.90102e-07
database_2016_11_16_Traj1_R.mat	E2_RT1D12.017F0001.xls	3	0.0304314	35.4126	0.958726	4.53235e-05	1.67196e-07
database_2016_11_16_Traj1_R.mat	E2_RT1D12.218F0001.xls	3	0.0358452	43.1494	0.930059	4.46763e-05	1.99399e-07
database_2016_11_16_Traj1_R.mat	E2_RT1D12.419F0001.xls	3	0.0251085	29.8176	0.928952	5.02556e-05	2.21835e-07
database_2016_11_16_Traj1_R.mat	E2_RT1D12.620F0001.xls	3	0.0479153	48.0797	0.903115	4.69501e-05	1.96672e-08
database_2016_11_16_Traj1_R.mat	E2_RT1D12.821F0001.xls	3	0.0489973	59.0366	0.909466	5.90584e-05	8.92612e-08
database_2016_11_16_Traj1_R.mat	E2_RT1D13.022F0001.xls	3	0.0489087	48.3649	0.899242	6.23851e-05	1.79508e-07
database_2016_11_16_Traj1_R.mat	E2_RT1D13.222F0001.xls	3	0.0506104	46.8452	0.940167	5.931e-05	5.56367e-08
database_2016_11_16_Traj1_R.mat	E2_RT1D13.417F0001.xls	3	0.0522969	36.6408	0.932537	0.000128499	3.98184e-08
database_2016_11_16_Traj1_R.mat	E2_RT1D13.617F0001.xls	3	0.0333319	34.0307	0.915116	5.51315e-05	1.82466e-07
database_2016_11_16_Traj1_R.mat	E2_RT1D13.818F0002.xls	3	0.0314213	40.0179	0.85708	4.41672e-05	2.00132e-07
database_2016_11_16_Traj1_R.mat	E2_RT1D13.958F0001.xls	3	0.033943	40.4927	0.885137	4.79105e-05	3.07546e-07
database_2016_11_16_Traj1_R.mat	E2_RT1D14.077F0001.xls	3	0.0475152	48.1077	0.940887	5.25505e-05	3.93851e-07
database_2016_11_16_Traj1_R.mat	E2_RT1D14.209F0001.xls	3	0.0426936	8.89138	1.18875	7.28237e-05	1.30709e-06
database_2016_11_16_Traj1_R.mat	E2_RT1D14.341F0001.xls	3	0.0451629	61.0728	0.868311	5.36435e-05	2.26993e-07
database_2016_11_16_Traj1_R.mat	E2_RT1D14.594F0001.xls	3	0.0375141	44.6363	0.806988	6.09921e-05	1.47438e-06
database_2016_11_16_Traj1_R.mat	E2_RT1D14.696F0001.xls	3	0.0407677	45.7037	0.839906	5.59318e-05	1.20004e-06
database_2016_11_16_Traj1_R.mat	E2_RT1D14.796F0001.xls	3	0.0258859	27.3528	0.89261	5.26446e-05	1.34879e-06
database_2016_11_16_Traj1_R.mat	E2_RT1D14.896F0001.xls	3	0.0433376	15.0314	1.17081	8.92971e-05	5.61672e-07
database_2016_11_16_Traj1_R.mat	E1_RT1D10.964F0001.xls	4	0.0327756	29.6795	0.796494	6.25953e-05	3.06905e-07
database_2016_11_16_Traj1_R.mat	E1_RT1D11.164F0001.xls	4	0.0359386	36.7642	1.00038	5.71496e-05	6.46321e-07
database_2016_11_16_Traj1_R.mat	E1_RT1D11.365F0001.xls	4	0.0408056	42.5124	0.967081	0.000666006	6.18874e-07
database_2016_11_16_Traj1_R.mat	E1_RT1D11.605F0002.xls	4	0.0355386	29.1734	0.906082	6.43392e-05	2.2131e-06
database_2016_11_16_Traj1_R.mat	E1_RT1D11.651F0001.xls	4	0.0379809	32.2294	0.946102	5.46975e-05	1.237e-07
database_2016_11_16_Traj1_R.mat	E1_RT1D11.851F0002.xls	4	0.0388162	37.8574	0.928424	6.49922e-05	6.70291e-07
database_2016_11_16_Traj1_R.mat	E1_RT1D12.017F0001.xls	4	0.0219	27.4601	0.85397	5.39138e-05	9.04735e-08
database_2016_11_16_Traj1_R.mat	E1_RT1D12.218F0001.xls	4	0.0265733	32.7472	1.03684	6.71957e-05	3.44404e-07
database_2016_11_16_Traj1_R.mat	E1_RT1D12.419F0001.xls	4	0.0330623	29.0767	0.952542	6.67457e-05	1.13213e-06
database_2016_11_16_Traj1_R.mat	E1_RT1D12.821F0001.xls	4	0.0253655	24.7361	0.983649	5.98458e-05	3.56059e-07
database_2016_11_16_Traj1_R.mat	E1_RT1D13.222F0001.xls	4	0.0525139	28.5334	0.988647	8.36403e-05	1.32841e-07
database_2016_11_16_Traj1_R.mat	E1_RT1D13.617F0001.xls	4	0.0353141	34.7297	0.869846	5.97686e-05	1.12074e-07
database_2016_11_16_Traj1_R.mat	E1_RT1D13.818F0002.xls	4	0.0361194	34.1454	0.881977	5.8962e-05	4.91605e-07
database_2016_11_16_Traj1_R.mat	E1_RT1D14.209F0001.xls	4	0.0287858	24.2422	0.963446	6.5325e-05	7.83502e-07
database_2016_11_16_Traj1_R.mat	E1_RT1D14.594F0001.xls	4	0.0217353	18.1711	0.94887	5.50492e-05	1.21647e-06
database_2016_11_16_Traj1_R.mat	E1_RT1D14.696F0001.xls	4	0.0343254	31.2058	0.928648	4.99869e-05	3.09457e-07
database_2016_11_16_Traj1_R.mat	E2_RT1D11.851F0002.xls	4	0.0313473	33.6739	1.01291	6.03051e-05	3.87116e-07
database_2016_11_16_Traj1_R.mat	E2_RT1D12.419F0001.xls	4	0.0297386	26.8359	0.884738	5.02556e-05	2.23598e-07
database_2016_11_16_Traj1_R.mat	E2_RT1D12.620F0001.xls	4	0.0325593	42.0549	0.900491	4.69501e-05	2.27281e-08
database_2016_11_16_Traj1_R.mat	E2_RT1D13.022F0001.xls	4	0.0649775	31.2619	0.990703	6.23851e-05	1.58793e-07
database_2016_11_16_Traj1_R.mat	E2_RT1D13.222F0001.xls	4	0.0571612	36.9483	1.00864	5.931e-05	2.12402e-08
database_2016_11_16_Traj1_R.mat	E2_RT1D13.417F0001.xls	4	0.0295494	42.2704	0.943397	0.000128499	5.97426e-08
database_2016_11_16_Traj1_R.mat	E2_RT1D13.617F0001.xls	4	0.0412984	32.6322	0.939208	5.51315e-05	1.92358e-07
database_2016_11_16_Traj1_R.mat	E2_RT1D13.818F0002.xls	4	0.0309372	35.4899	0.90219	4.41672e-05	2.59947e-07
database_2016_11_16_Traj1_R.mat	E2_RT1D14.209F0001.xls	4	0.0344376	31.524	0.874551	7.28237e-05	4.98369e-07
database_2016_11_16_Traj1_R.mat	E2_RT1D14.696F0001.xls	4	0.0243692	24.042	0.850859	5.59318e-05	1.45403e-06
database_2016_11_16_Traj1_R.mat	E2_RT1D14.796F0001.xls	4	0.038172	29.817	1.05013	5.26446e-05	1.61791e-06
database_2016_11_16_Traj1_R.mat	E2_RT1D14.896F0001.xls	4	0.0439766	35.8814	0.963867	8.92971e-05	8.40351e-08
database_2016_11_16_Traj1_R.mat	E1_RT1D13.222F0001.xls	5	0.0389518	41.3614	0.875772	8.36403e-05	2.59182e-07
database_2016_11_16_Traj1_R.mat	E1_RT1D14.594F0001.xls	5	0.0264616	26.1664	0.994566	5.50492e-05	1.15878e-06
database_2016_11_16_Traj1_R.mat	E2_RT1D13.617F0001.xls	5	0.0423563	27.9705	0.945703	5.51315e-05	1.50172e-07
database_2016_11_16_Traj1_R.mat	E2_RT1D14.209F0001.xls	5	0.0312701	22.8347	0.965841	7.28237e-05	5.02224e-07
database_2016_11_16_Traj2_L.mat	E1_LT1D10.133F0001.xls	1	0.0630288	50.4085	0.876425	9.04425e-05	2.2309e-07
database_2016_11_16_Traj2_L.mat	E1_LT1D10.334F0001.xls	1	0.0477117	43.1819	0.937343	7.81969e-05	6.75266e-08
database_2016_11_16_Traj2_L.mat	E1_LT1D10.635F0001.xls	1	0.0292448	34.1831	0.860315	5.70364e-05	6.84107e-07
database_2016_11_16_Traj2_L.mat	E1_LT1D10.869F0001.xls	1	0.427719	30.3483	0.808699	0.000271169	2.57529e-07
database_2016_11_16_Traj2_L.mat	E1_LT1D11.167F0001.xls	1	0.0434092	34.049	0.914546	6.08166e-05	7.44668e-07
database_2016_11_16_Traj2_L.mat	E1_LT1D11.468F0001.xls	1	0.059999	40.3093	0.976816	6.20023e-05	6.0188e-07
database_2016_11_16_Traj2_L.mat	E1_LT1D11.768F0001.xls	1	0.0270453	39.607	0.958156	5.18693e-05	4.71043e-07
database_2016_11_16_Traj2_L.mat	E1_LT1D12.069F0001.xls	1	0.0290965	38.2365	0.938149	5.94461e-05	3.86596e-07
database_2016_11_16_Traj2_L.mat	E1_LT1D12.370F0001.xls	1	0.0395222	38.3225	0.975952	0.000161657	3.36426e-07
database_2016_11_16_Traj2_L.mat	E1_LT1D12.626F0001.xls	1	0.0409734	49.3125	0.899466	9.31195e-05	1.56653e-07
database_2016_11_16_Traj2_L.mat	E1_LT1D13.154F0001.xls	1	0.035996	42.7955	0.940324	5.19866e-05	5.25234e-07
database_2016_11_16_Traj2_L.mat	E1_LT1D13.456F0001.xls	1	0.0446924	49.0067	0.899925	5.82422e-05	4.67321e-07
database_2016_11_16_Traj2_L.mat	E1_LT1D13.704F0001.xls	1	0.0339325	46.6913	0.882958	5.55329e-05	2.03555e-07
database_2016_11_16_Traj2_L.mat	E1_LT1D13.954F0001.xls	1	0.035099	37.8031	0.991194	5.14276e-05	1.37148e-07
database_2016_11_16_Traj2_L.mat	E1_LT1D14.209F0001.xls	1	0.0500343	40.5775	0.902254	4.60285e-05	1.88573e-07
database_2016_11_16_Traj2_L.mat	E1_LT1D14.594F0001.xls	1	0.0805295	102.307	0.785417	3.63121e-05	3.78781e-07
database_2016_11_16_Traj2_L.mat	E1_LT1D14.695F0001.xls	1	0.0253392	37.3702	0.989807	4.93577e-05	3.84212e-07
database_2016_11_16_Traj2_L.mat	E1_LT1D14.797F0001.xls	1	0.030241	32.9627	1.02137	5.1101e-05	3.75046e-07
database_2016_11_16_Traj2_L.mat	E1_LT1D14.898F0001.xls	1	0.055716	60.0956	0.846829	7.02114e-05	4.43784e-07
database_2016_11_16_Traj2_L.mat	E1_LT1D9.530F0001.xls	1	0.418225	55.2854	1.13152	0.000222354	6.3647e-08
database_2016_11_16_Traj2_L.mat	E1_LT1D9.731F0001.xls	1	0.0398018	40.5587	0.90077	8.6219e-05	6.20219e-08
database_2016_11_16_Traj2_L.mat	E1_LT1D9.933F0001.xls	1	0.0265072	34.7373	1.03322	5.95229e-05	8.84249e-07
database_2016_11_16_Traj2_L.mat	E2_LT1D10.334F0001.xls	1	0.222785	48.2434	0.876245	0.000218494	4.67633e-08
database_2016_11_16_Traj2_L.mat	E2_LT1D10.635F0001.xls	1	0.244571	15.7076	1.07691	0.000987744	1.21974e-07
database_2016_11_16_Traj2_L.mat	E2_LT1D10.869F0001.xls	1	0.222711	62.4951	0.91555	0.000254801	9.75232e-09
database_2016_11_16_Traj2_L.mat	E2_LT1D11.167F0001.xls	1	0.109827	75.3409	0.895092	0.000409817	4.64187e-08
database_2016_11_16_Traj2_L.mat	E2_LT1D11.468F0001.xls	1	0.144516	52.3821	1.27051	0.000318229	2.5372e-08
database_2016_11_16_Traj2_L.mat	E2_LT1D11.768F0001.xls	1	0.369617	13.6087	3.67316	0.000201733	8.40706e-07
database_2016_11_16_Traj2_L.mat	E2_LT1D12.069F0001.xls	1	0.521053	40.6351	1.7494	0.000618011	4.36426e-07
database_2016_11_16_Traj2_L.mat	E2_LT1D12.370F0001.xls	1	0.176114	60.615	1.16364	0.000666857	4.19754e-07
database_2016_11_16_Traj2_L.mat	E2_LT1D12.626F0001.xls	1	0.541859	64.0471	1.28663	0.000735551	9.97774e-09
database_2016_11_16_Traj2_L.mat	E2_LT1D13.154F0001.xls	1	0.489012	68.1779	1.19911	0.000522013	1.46806e-08
database_2016_11_16_Traj2_L.mat	E2_LT1D13.456F0001.xls	1	0.19655	29.4041	1.37316	0.000562429	2.62459e-08
database_2016_11_16_Traj2_L.mat	E2_LT1D13.704F0001.xls	1	0.389359	22.9177	1.4769	0.000538841	1.94831e-08
database_2016_11_16_Traj2_L.mat	E2_LT1D13.954F0001.xls	1	0.278085	44.072	1.31776	0.000262454	5.84209e-07
database_2016_11_16_Traj2_L.mat	E2_LT1D14.209F0001.xls	1	0.463253	5.20433	2.93834	0.000314788	4.60498e-07
database_2016_11_16_Traj2_L.mat	E2_LT1D14.594F0001.xls	1	0.112757	44.867	0.84587	0.00073642	6.75773e-07
database_2016_11_16_Traj2_L.mat	E2_LT1D14.695F0001.xls	1	0.146371	70.7742	0.900872	0.000828266	1.3947e-07
database_2016_11_16_Traj2_L.mat	E2_LT1D14.797F0001.xls	1	0.10984	80.5747	0.896492	0.000307664	4.63016e-08
database_2016_11_16_Traj2_L.mat	E2_LT1D14.898F0001.xls	1	0.210355	51.8792	1.0407	0.000224001	1.75147e-06
database_2016_11_16_Traj2_L.mat	E1_LT1D10.133F0001.xls	2	0.0575684	37.2561	0.965082	9.04425e-05	2.67429e-07
database_2016_11_16_Traj2_L.mat	E1_LT1D10.334F0001.xls	2	0.033152	25.2034	1.04234	7.81969e-05	1.87382e-07
database_2016_11_16_Traj2_L.mat	E1_LT1D10.635F0001.xls	2	0.0258283	25.0355	0.934977	5.70364e-05	8.78166e-07
database_2016_11_16_Traj2_L.mat	E1_LT1D10.869F0001.xls	2	0.0901888	115.803	0.780235	0.000271169	1.08353e-07
database_2016_11_16_Traj2_L.mat	E1_LT1D11.167F0001.xls	2	0.0326132	35.1115	0.964913	6.08166e-05	4.28254e-07
database_2016_11_16_Traj2_L.mat	E1_LT1D11.468F0001.xls	2	0.0454467	44.442	0.926378	6.20023e-05	7.06179e-07
database_2016_11_16_Traj2_L.mat	E1_LT1D11.768F0001.xls	2	0.069308	44.1014	0.914225	5.18693e-05	3.51633e-07
database_2016_11_16_Traj2_L.mat	E1_LT1D12.069F0001.xls	2	0.0339885	29.6587	0.883135	5.94461e-05	4.13266e-07
database_2016_11_16_Traj2_L.mat	E1_LT1D12.370F0001.xls	2	0.0260475	27.0781	0.99	0.000161657	9.1073e-07
database_2016_11_16_Traj2_L.mat	E1_LT1D12.626F0001.xls	2	0.0547102	61.5849	0.901721	9.31195e-05	1.59539e-07
database_2016_11_16_Traj2_L.mat	E1_LT1D13.154F0001.xls	2	0.0393267	40.7509	0.864543	5.19866e-05	1.18196e-06
database_2016_11_16_Traj2_L.mat	E1_LT1D13.456F0001.xls	2	0.057922	35.4272	0.923539	5.82422e-05	3.7781e-07
database_2016_11_16_Traj2_L.mat	E1_LT1D13.704F0001.xls	2	0.0349021	42.4612	0.890285	5.55329e-05	2.04487e-07
database_2016_11_16_Traj2_L.mat	E1_LT1D13.954F0001.xls	2	0.0482368	35.7433	0.889363	5.14276e-05	4.48984e-07
database_2016_11_16_Traj2_L.mat	E1_LT1D14.209F0001.xls	2	0.0271756	36.1864	0.893503	4.60285e-05	2.27748e-07
database_2016_11_16_Traj2_L.mat	E1_LT1D14.695F0001.xls	2	0.0190215	25.046	0.900147	4.93577e-05	7.97938e-07
database_2016_11_16_Traj2_L.mat	E1_LT1D14.797F0001.xls	2	0.0504454	35.2625	0.942697	5.1101e-05	6.72824e-07
database_2016_11_16_Traj2_L.mat	E1_LT1D14.898F0001.xls	2	0.0701227	62.2504	0.882909	7.02114e-05	4.09362e-07
database_2016_11_16_Traj2_L.mat	E1_LT1D9.530F0001.xls	2	0.0905935	97.0764	0.875278	0.000222354	1.6839e-07
database_2016_11_16_Traj2_L.mat	E1_LT1D9.731F0001.xls	2	0.0473139	38.8143	0.889806	8.6219e-05	2.7211e-08
database_2016_11_16_Traj2_L.mat	E1_LT1D9.933F0001.xls	2	0.0392519	31.1716	0.906878	5.95229e-05	1.37441e-06
database_2016_11_16_Traj2_L.mat	E2_LT1D10.334F0001.xls	2	0.680666	13.2375	1.59024	0.000218494	5.6621e-08
database_2016_11_16_Traj2_L.mat	E2_LT1D10.635F0001.xls	2	0.107646	117.717	0.761152	0.000987744	1.45457e-07
database_2016_11_16_Traj2_L.mat	E2_LT1D10.869F0001.xls	2	0.121044	55.7464	1.10321	0.000254801	6.23819e-08
database_2016_11_16_Traj2_L.mat	E2_LT1D11.167F0001.xls	2	0.372128	16.4687	1.76124	0.000409817	2.15479e-07
database_2016_11_16_Traj2_L.mat	E2_LT1D11.468F0001.xls	2	0.260395	33.7559	1.99634	0.000318229	3.82579e-08
database_2016_11_16_Traj2_L.mat	E2_LT1D11.768F0001.xls	2	0.120872	110.273	0.838378	0.000201733	2.50244e-08
database_2016_11_16_Traj2_L.mat	E2_LT1D12.069F0001.xls	2	0.62028	18.7547	2.24659	0.000618011	1.60176e-07
database_2016_11_16_Traj2_L.mat	E2_LT1D12.370F0001.xls	2	0.483872	29.5813	1.7896	0.000666857	1.82216e-07
database_2016_11_16_Traj2_L.mat	E2_LT1D12.626F0001.xls	2	0.0832189	40.1689	1.29624	0.000735551	7.11807e-08
database_2016_11_16_Traj2_L.mat	E2_LT1D13.154F0001.xls	2	0.0866457	40.5115	1.69859	0.000522013	7.51753e-08
database_2016_11_16_Traj2_L.mat	E2_LT1D13.456F0001.xls	2	0.138275	119.533	0.808668	0.000562429	3.76895e-09
database_2016_11_16_Traj2_L.mat	E2_LT1D13.704F0001.xls	2	0.140498	127.868	0.740859	0.000538841	1.40312e-08
database_2016_11_16_Traj2_L.mat	E2_LT1D13.954F0001.xls	2	0.110756	96.4984	0.893768	0.000262454	2.04733e-07
database_2016_11_16_Traj2_L.mat	E2_LT1D14.209F0001.xls	2	0.116847	133.605	0.701352	0.000314788	1.99837e-07
database_2016_11_16_Traj2_L.mat	E2_LT1D14.594F0001.xls	2	0.449055	39.774	0.640901	0.00073642	1.43733e-07
database_2016_11_16_Traj2_L.mat	E2_LT1D14.695F0001.xls	2	0.44575	23.2601	3.5041	0.000828266	1.64264e-07
database_2016_11_16_Traj2_L.mat	E2_LT1D14.797F0001.xls	2	0.343235	29.0113	1.29162	0.000307664	1.3058e-07
database_2016_11_16_Traj2_L.mat	E2_LT1D14.898F0001.xls	2	0.0858663	55.7044	0.95611	0.000224001	1.56426e-06
database_2016_11_16_Traj2_L.mat	E1_LT1D10.133F0001.xls	3	0.0407326	41.3897	0.941515	9.04425e-05	2.50226e-07
database_2016_11_16_Traj2_L.mat	E1_LT1D10.334F0001.xls	3	0.0767714	12.4757	0.975991	7.81969e-05	2.20195e-07
database_2016_11_16_Traj2_L.mat	E1_LT1D10.635F0001.xls	3	0.0454255	33.5211	0.975161	5.70364e-05	6.62204e-07
database_2016_11_16_Traj2_L.mat	E1_LT1D11.167F0001.xls	3	0.0277341	25.7903	1.05239	6.08166e-05	1.365e-06
database_2016_11_16_Traj2_L.mat	E1_LT1D11.468F0001.xls	3	0.0397412	39.8007	0.915444	6.20023e-05	8.01463e-07
database_2016_11_16_Traj2_L.mat	E1_LT1D11.768F0001.xls	3	0.0286882	38.6238	0.968311	5.18693e-05	6.05147e-07
database_2016_11_16_Traj2_L.mat	E1_LT1D12.069F0001.xls	3	0.0327517	35.4014	1.01523	5.94461e-05	4.09856e-07
database_2016_11_16_Traj2_L.mat	E1_LT1D12.370F0001.xls	3	0.0350264	34.8803	1.01048	0.000161657	5.91593e-07
database_2016_11_16_Traj2_L.mat	E1_LT1D12.626F0001.xls	3	0.0506096	57.5127	0.89203	9.31195e-05	2.7857e-07
database_2016_11_16_Traj2_L.mat	E1_LT1D13.154F0001.xls	3	0.0560337	39.8344	0.905316	5.19866e-05	6.89608e-07
database_2016_11_16_Traj2_L.mat	E1_LT1D13.456F0001.xls	3	0.0435914	47.145	0.907696	5.82422e-05	3.52892e-07
database_2016_11_16_Traj2_L.mat	E1_LT1D13.704F0001.xls	3	0.0482148	47.0126	0.86148	5.55329e-05	3.00927e-07
database_2016_11_16_Traj2_L.mat	E1_LT1D13.954F0001.xls	3	0.0407908	47.7385	0.911928	5.14276e-05	2.79624e-07
database_2016_11_16_Traj2_L.mat	E1_LT1D14.209F0001.xls	3	0.0251748	36.7556	0.94469	4.60285e-05	3.19279e-07
database_2016_11_16_Traj2_L.mat	E1_LT1D14.695F0001.xls	3	0.041729	38.7616	0.880445	4.93577e-05	3.47194e-07
database_2016_11_16_Traj2_L.mat	E1_LT1D14.797F0001.xls	3	0.0287206	27.8157	0.924714	5.1101e-05	5.80416e-07
database_2016_11_16_Traj2_L.mat	E1_LT1D14.898F0001.xls	3	0.0399228	47.8849	0.869736	7.02114e-05	7.00471e-07
database_2016_11_16_Traj2_L.mat	E1_LT1D9.731F0001.xls	3	0.0946773	21.1516	0.991406	8.6219e-05	9.12138e-08
database_2016_11_16_Traj2_L.mat	E1_LT1D9.933F0001.xls	3	0.0401957	33.357	0.956422	5.95229e-05	8.0767e-07
database_2016_11_16_Traj2_L.mat	E2_LT1D10.334F0001.xls	3	0.0845677	62.3634	0.874493	0.000218494	6.18412e-08
database_2016_11_16_Traj2_L.mat	E2_LT1D11.167F0001.xls	3	0.0494615	29.1222	2.10334	0.000409817	3.92117e-07
database_2016_11_16_Traj2_L.mat	E2_LT1D11.468F0001.xls	3	0.226931	24.0296	1.89712	0.000318229	8.02002e-08
database_2016_11_16_Traj2_L.mat	E2_LT1D12.069F0001.xls	3	0.0693715	50.3032	1.01022	0.000618011	2.28972e-07
database_2016_11_16_Traj2_L.mat	E2_LT1D12.370F0001.xls	3	0.0795725	18.9565	1.56851	0.000666857	5.02478e-07
database_2016_11_16_Traj2_L.mat	E2_LT1D14.797F0001.xls	3	0.0860661	28.5733	0.983761	0.000307664	1.04845e-07
database_2016_11_16_Traj2_L.mat	E1_LT1D10.334F0001.xls	4	0.0316083	29.614	0.924853	7.81969e-05	1.52472e-07
database_2016_11_16_Traj2_L.mat	E1_LT1D10.635F0001.xls	4	0.0262204	31.3545	0.961993	5.70364e-05	1.51392e-06
database_2016_11_16_Traj2_L.mat	E1_LT1D11.167F0001.xls	4	0.0241985	26.7562	0.935282	6.08166e-05	6.61709e-07
database_2016_11_16_Traj2_L.mat	E1_LT1D12.069F0001.xls	4	0.0195883	26.8237	0.893843	5.94461e-05	9.78987e-07
database_2016_11_16_Traj2_L.mat	E1_LT1D12.370F0001.xls	4	0.0143706	20.5763	1.04854	0.000161657	1.61878e-06
database_2016_11_16_Traj2_L.mat	E1_LT1D13.154F0001.xls	4	0.0288889	38.2128	0.917745	5.19866e-05	6.91036e-07
database_2016_11_16_Traj2_L.mat	E1_LT1D13.456F0001.xls	4	0.0275249	34.4416	1.00167	5.82422e-05	7.93647e-07
database_2016_11_16_Traj2_L.mat	E1_LT1D13.704F0001.xls	4	0.0360787	35.5539	0.937119	5.55329e-05	1.85891e-07
database_2016_11_16_Traj2_L.mat	E1_LT1D14.209F0001.xls	4	0.0345	35.2919	0.862607	4.60285e-05	1.72687e-07
database_2016_11_16_Traj2_L.mat	E1_LT1D14.695F0001.xls	4	0.0306647	27.1331	0.922034	4.93577e-05	7.31571e-07
database_2016_11_16_Traj2_L.mat	E1_LT1D14.797F0001.xls	4	0.0267553	30.9915	0.943875	5.1101e-05	5.98081e-07
database_2016_11_16_Traj2_L.mat	E1_LT1D9.731F0001.xls	4	0.0244073	25.7308	0.954662	8.6219e-05	5.04772e-08
database_2016_11_16_Traj2_L.mat	E1_LT1D9.933F0001.xls	4	0.0216399	20.9344	0.949897	5.95229e-05	1.00985e-06
database_2016_11_16_Traj2_L.mat	E2_LT1D12.069F0001.xls	4	0.043505	8.21426	1.5717	0.000618011	1.26411e-06
database_2016_11_16_Traj2_L.mat	E1_LT1D10.334F0001.xls	5	0.0287147	29.9501	0.962444	7.81969e-05	1.2857e-07
database_2008_12_18_Traj1_R.mat	E1_11599.xls	1	0.739937	48.8441	1.10853	0.000185658
database_2008_12_18_Traj1_R.mat	E1_11839.xls	1	0.300437	15.253	0.96566	0.000286108
database_2008_12_18_Traj1_R.mat	E1_12078.xls	1	0.0153823	17.9645	1.16321	0.000121469
database_2008_12_18_Traj1_R.mat	E1_12305.xls	1	0.0335819	14.5853	0.892895	0.000672236
database_2008_12_18_Traj1_R.mat	E1_12628.xls	1	0.0277047	18.5066	1.03008	0.000141731
database_2008_12_18_Traj1_R.mat	E1_12995.xls	1	0.0867013	20.7194	0.98986	0.00151326
database_2008_12_18_Traj1_R.mat	E1_13310.xls	1	0.0567903	40.0231	0.931872	0.00198543
database_2008_12_18_Traj1_R.mat	E1_13633.xls	1	0.0269057	19.6519	0.995836	0.00450789
database_2008_12_18_Traj1_R.mat	E1_13946.xls	1	0.26148	12.3944	1.20503	0.000266734
database_2008_12_18_Traj1_R.mat	E1_14267.xls	1	0.0258835	19.1165	0.971521	0.000148005
database_2008_12_18_Traj1_R.mat	E1_14634.xls	1	0.808112	4.41603	3.1641	0.000279343
database_2008_12_18_Traj1_R.mat	E1_15000.xls	1	0.029171	13.7966	1.08352	0.00226863
database_2008_12_18_Traj1_R.mat	E2_11839.xls	1	0.221905	27.644	0.973042	0.000191623
database_2008_12_18_Traj1_R.mat	E2_12305.xls	1	0.44877	13.5605	1.01849	0.000461437
database_2008_12_18_Traj1_R.mat	E2_12995.xls	1	0.0588541	42.2468	0.90694	0.00096645
database_2008_12_18_Traj1_R.mat	E2_13310.xls	1	0.0879483	29.7532	1.06314	0.000800095
database_2008_12_18_Traj1_R.mat	E2_13946.xls	1	0.449246	10.762	4.90008	0.000685348
database_2008_12_18_Traj1_R.mat	E2_14267.xls	1	0.306868	12.7697	1.22957	0.000330731
database_2008_12_18_Traj1_R.mat	E2_14634.xls	1	0.209844	13.8057	1.76396	0.000864237
database_2008_12_18_Traj1_R.mat	E2_15000.xls	1	0.0399183	18.5723	0.980609	0.00167222
database_2008_12_18_Traj1_R.mat	E1_11599.xls	2	0.132892	51.8953	1.05977	0.000185658
database_2008_12_18_Traj1_R.mat	E1_11839.xls	2	0.212732	61.7673	1.21236	0.000286108
database_2008_12_18_Traj1_R.mat	E1_12078.xls	2	0.0281628	15.8817	0.905217	0.000121469
database_2008_12_18_Traj1_R.mat	E1_12305.xls	2	0.103964	11.3778	1.11753	0.000672236
database_2008_12_18_Traj1_R.mat	E1_12628.xls	2	0.025003	16.0435	1.0025	0.000141731
database_2008_12_18_Traj1_R.mat	E1_12995.xls	2	0.0580417	18.8625	1.00791	0.00151326
database_2008_12_18_Traj1_R.mat	E1_13310.xls	2	0.376793	15.3299	1.70429	0.00198543
database_2008_12_18_Traj1_R.mat	E1_13633.xls	2	0.0267313	13.7483	0.882881	0.00450789
database_2008_12_18_Traj1_R.mat	E1_13946.xls	2	0.093879	12.9229	0.988774	0.000266734
database_2008_12_18_Traj1_R.mat	E1_14267.xls	2	0.0789783	13.8942	0.912033	0.000148005
database_2008_12_18_Traj1_R.mat	E1_14634.xls	2	0.0784236	50.8486	0.978116	0.000279343
database_2008_12_18_Traj1_R.mat	E1_15000.xls	2	0.0165532	15.6917	0.983134	0.00226863
database_2008_12_18_Traj1_R.mat	E2_11839.xls	2	0.0482947	42.9767	0.94931	0.000191623
database_2008_12_18_Traj1_R.mat	E2_12305.xls	2	0.168027	67.4998	0.907755	0.000461437
database_2008_12_18_Traj1_R.mat	E2_12995.xls	2	0.0895068	16.4293	1.19192	0.00096645
database_2008_12_18_Traj1_R.mat	E2_13310.xls	2	0.0411152	35.2193	1.05066	0.000800095
database_2008_12_18_Traj1_R.mat	E2_13946.xls	2	0.0853852	53.2814	1.06372	0.000685348
database_2008_12_18_Traj1_R.mat	E2_14267.xls	2	0.0312977	21.1709	1.04718	0.000330731
database_2008_12_18_Traj1_R.mat	E2_14634.xls	2	0.091562	40.0022	0.959563	0.000864237
database_2008_12_18_Traj1_R.mat	E2_15000.xls	2	0.0457264	18.9892	0.915514	0.00167222
database_2008_12_18_Traj1_R.mat	E1_12078.xls	3	0.0231627	13.0178	0.923608	0.000121469
database_2008_12_18_Traj1_R.mat	E1_12305.xls	3	0.0277974	14.6459	1.06274	0.000672236
database_2008_12_18_Traj1_R.mat	E1_12628.xls	3	0.0322655	13.8023	0.937147	0.000141731
database_2008_12_18_Traj1_R.mat	E1_12995.xls	3	0.0383102	21.5012	1.07771	0.00151326
database_2008_12_18_Traj1_R.mat	E1_13633.xls	3	0.0649818	19.8945	1.06086	0.00450789
database_2008_12_18_Traj1_R.mat	E1_13946.xls	3	0.798525	1.48925	1.68776	0.000266734
database_2008_12_18_Traj1_R.mat	E1_14267.xls	3	0.0414041	17.775	1.08001	0.000148005
database_2008_12_18_Traj1_R.mat	E1_15000.xls	3	0.044632	11.1245	1.04365	0.00226863
database_2008_12_18_Traj1_R.mat	E2_12995.xls	3	0.0590819	11.0507	1.23699	0.00096645
database_2008_12_18_Traj1_R.mat	E2_14267.xls	3	0.0462675	23.1871	1.00157	0.000330731
database_2008_12_18_Traj1_R.mat	E2_14634.xls	3	0.354937	29.7551	1.99242	0.000864237
database_2008_12_18_Traj1_R.mat	E2_15000.xls	3	0.0492973	12.868	0.971616	0.00167222
database_2008_12_18_Traj1_R.mat	E1_12078.xls	4	0.0405475	13.9724	1.14368	0.000121469
database_2008_12_18_Traj1_R.mat	E1_12305.xls	4	0.0285663	11.0147	1.03613	0.000672236
database_2008_12_18_Traj1_R.mat	E1_12628.xls	4	0.0353262	13.7801	1.03229	0.000141731
database_2008_12_18_Traj1_R.mat	E1_13633.xls	4	0.0197705	5.66105	1.53031	0.00450789
database_2008_12_18_Traj1_R.mat	E1_13946.xls	4	0.0317315	17.9191	0.986221	0.000266734
database_2008_12_18_Traj1_R.mat	E1_14267.xls	4	0.00549178	6.94712	1.67996	0.000148005
database_2008_12_18_Traj1_R.mat	E1_15000.xls	4	0.0239935	16.4687	0.93185	0.00226863
database_2008_12_18_Traj1_R.mat	E2_14267.xls	4	0.738758	3.26444	2.3136	0.000330731
database_2008_12_18_Traj1_R.mat	E2_15000.xls	4	0.789879	0.246367	1.3598	0.00167222
database_2008_12_18_Traj1_R.mat	E1_13946.xls	5	0.0326518	19.4083	1.01791	0.000266734
database_2008_12_18_Traj1_R.mat	E2_15000.xls	5	0.00735545	7.92166	0.981976	0.00167222
database_2008_12_18_Traj2_L.mat	E1_11368.xls	1	0.0328715	20.9415	1.05348	0.000102024
database_2008_12_18_Traj2_L.mat	E1_11560.xls	1	0.0511667	18.8498	0.947157	0.00056533
database_2008_12_18_Traj2_L.mat	E1_11759.xls	1	0.207319	31.4449	0.899667	0.000138989
database_2008_12_18_Traj2_L.mat	E1_11907.xls	1	0.0401261	19.8402	0.879337	0.000133912
database_2008_12_18_Traj2_L.mat	E1_12052.xls	1	0.317867	35.9988	0.823744	0.000219631
database_2008_12_18_Traj2_L.mat	E1_12191.xls	1	0.0523254	29.446	0.998484	0.000178045
database_2008_12_18_Traj2_L.mat	E1_12345.xls	1	0.0408305	16.1112	1.2711	0.000110869
database_2008_12_18_Traj2_L.mat	E1_12509.xls	1	0.038021	22.1183	1.08202	0.000109643
database_2008_12_18_Traj2_L.mat	E1_12750.xls	1	0.0478886	31.6877	0.986417	0.000190241
database_2008_12_18_Traj2_L.mat	E1_13067.xls	1	0.253881	14.1472	4.68679	0.000408581
database_2008_12_18_Traj2_L.mat	E1_13388.xls	1	0.0699775	17.7158	0.940299	0.000809869
database_2008_12_18_Traj2_L.mat	E1_14047.xls	1	0.451869	16.9845	2.48457	0.00266479
database_2008_12_18_Traj2_L.mat	E1_14294.xls	1	0.242428	15.6452	1.5166	0.0018821
database_2008_12_18_Traj2_L.mat	E1_14665.xls	1	0.0811858	58.0452	1.08466	0.00220021
database_2008_12_18_Traj2_L.mat	E1_14999.xls	1	0.0252128	15.6131	1.02038	0.000120505
database_2008_12_18_Traj2_L.mat	E2_12750.xls	1	0.0358803	22.622	0.907905	0.000116765
database_2008_12_18_Traj2_L.mat	E2_13067.xls	1	0.0966285	19.758	0.981005	0.000110793
database_2008_12_18_Traj2_L.mat	E2_14047.xls	1	0.0876567	59.427	1.00458	0.00169255
database_2008_12_18_Traj2_L.mat	E2_14294.xls	1	0.0703037	41.2566	0.951405	0.00139498
database_2008_12_18_Traj2_L.mat	E2_14999.xls	1	0.0364537	12.3184	1.01952	0.000188557
database_2008_12_18_Traj2_L.mat	E1_11368.xls	2	0.0323068	11.0471	0.985057	0.000102024
database_2008_12_18_Traj2_L.mat	E1_11560.xls	2	0.244305	8.24949	1.19568	0.00056533
database_2008_12_18_Traj2_L.mat	E1_11759.xls	2	0.060284	29.6752	0.944134	0.000138989
database_2008_12_18_Traj2_L.mat	E1_11907.xls	2	0.040437	17.0589	0.99836	0.000133912
database_2008_12_18_Traj2_L.mat	E1_12052.xls	2	0.0680148	46.9513	0.98076	0.000219631
database_2008_12_18_Traj2_L.mat	E1_12191.xls	2	0.0918667	25.163	1.04546	0.000178045
database_2008_12_18_Traj2_L.mat	E1_12345.xls	2	0.0254003	14.9604	0.887171	0.000110869
database_2008_12_18_Traj2_L.mat	E1_12509.xls	2	0.0220918	12.1263	1.21013	0.000109643
database_2008_12_18_Traj2_L.mat	E1_12750.xls	2	0.0477527	28.3522	1.09209	0.000190241
database_2008_12_18_Traj2_L.mat	E1_13067.xls	2	0.0668633	50.9708	0.931342	0.000408581
database_2008_12_18_Traj2_L.mat	E1_13388.xls	2	0.0826101	8.67819	1.03183	0.000809869
database_2008_12_18_Traj2_L.mat	E1_14047.xls	2	0.0694931	49.33	1.07023	0.00266479
database_2008_12_18_Traj2_L.mat	E1_14294.xls	2	0.0722946	47.4337	1.02356	0.0018821
database_2008_12_18_Traj2_L.mat	E1_14999.xls	2	0.0547749	13.3368	0.957011	0.000120505
database_2008_12_18_Traj2_L.mat	E2_12750.xls	2	0.0785521	24.7013	0.94368	0.000116765
database_2008_12_18_Traj2_L.mat	E2_13067.xls	2	0.0579194	13.1173	0.951533	0.000110793
database_2008_12_18_Traj2_L.mat	E2_14294.xls	2	0.0261687	2.78168	1.02778	0.00139498
database_2008_12_18_Traj2_L.mat	E2_14999.xls	2	0.0813034	18.4777	0.968856	0.000188557
database_2008_12_18_Traj2_L.mat	E1_11368.xls	3	0.0253073	18.9242	1.01848	0.000102024
database_2008_12_18_Traj2_L.mat	E1_11560.xls	3	0.0843908	20.8305	0.929424	0.00056533
database_2008_12_18_Traj2_L.mat	E1_11907.xls	3	0.011688	14.5557	0.931347	0.000133912
database_2008_12_18_Traj2_L.mat	E1_12191.xls	3	0.28599	5.8892	3.90231	0.000178045
database_2008_12_18_Traj2_L.mat	E1_12345.xls	3	0.052796	12.1985	1.07658	0.000110869
database_2008_12_18_Traj2_L.mat	E1_12509.xls	3	0.00732592	5.62658	1.33314	0.000109643
database_2008_12_18_Traj2_L.mat	E1_13388.xls	3	0.0390316	12.2727	1.09595	0.000809869
database_2008_12_18_Traj2_L.mat	E1_14999.xls	3	0.0513393	16.094	0.929897	0.000120505
database_2008_12_18_Traj2_L.mat	E2_12750.xls	3	0.0268758	21.7904	0.947235	0.000116765
database_2008_12_18_Traj2_L.mat	E2_13067.xls	3	0.0254991	21.1517	0.881569	0.000110793
database_2008_12_18_Traj2_L.mat	E2_14294.xls	3	0.0235836	22.8976	1.08669	0.00139498
database_2008_12_18_Traj2_L.mat	E2_14999.xls	3	0.498881	1.82852	1.52984	0.000188557
database_2008_12_18_Traj2_L.mat	E1_11368.xls	4	0.0232493	11.3353	1.35063	0.000102024
database_2008_12_18_Traj2_L.mat	E1_11560.xls	4	0.0670683	16.9561	0.945834	0.00056533
database_2008_12_18_Traj2_L.mat	E1_12345.xls	4	0.0435448	16.9168	0.92108	0.000110869
database_2008_12_18_Traj2_L.mat	E1_12509.xls	4	0.00630055	10.6711	1.59105	0.000109643
database_2008_12_18_Traj2_L.mat	E1_13388.xls	4	0.0356969	16.9456	0.908861	0.000809869
database_2008_12_18_Traj2_L.mat	E1_14999.xls	4	0.0335502	13.6254	1.03649	0.000120505
database_2008_12_18_Traj2_L.mat	E2_13067.xls	4	0.0173444	14.593	0.960006	0.000110793
database_2008_12_18_Traj2_L.mat	E2_14999.xls	4	0.0758018	17.7719	0.965305	0.000188557
database_2008_12_18_Traj2_L.mat	E1_12509.xls	5	0.0420095	13.7754	1.22293	0.000109643
database_2008_12_18_Traj2_L.mat	E2_14999.xls	5	0.0113692	12.7676	0.95233	0.000188557
database_2009_09_30_Traj1_R.mat	E1_10793.xls	1	0.920612	64.9904	0.978181	0.000215009
database_2009_09_30_Traj1_R.mat	E1_10941.xls	1	0.0883299	35.5908	0.965171	0.0001869
database_2009_09_30_Traj1_R.mat	E1_11088.xls	1	0.0870389	34.7097	1.01805	9.58723e-05
database_2009_09_30_Traj1_R.mat	E1_11334.xls	1	0.0633697	27.0266	0.945781	8.88098e-05
database_2009_09_30_Traj1_R.mat	E1_11500.xls	1	0.0315033	20.6443	0.993426	9.1401e-05
database_2009_09_30_Traj1_R.mat	E1_11654.xls	1	0.0416287	23.3123	1.16039	9.20177e-05
database_2009_09_30_Traj1_R.mat	E1_11818.xls	1	0.0281756	19.3798	1.05808	0.000102885
database_2009_09_30_Traj1_R.mat	E1_12069.xls	1	0.782892	17.8631	0.564883	0.000382872
database_2009_09_30_Traj1_R.mat	E1_12401.xls	1	0.0311154	22.8549	1.04554	0.000119988
database_2009_09_30_Traj1_R.mat	E1_12630.xls	1	0.494092	8.68715	3.97172	0.000237733
database_2009_09_30_Traj1_R.mat	E1_12955.xls	1	0.0666655	46.6115	1.07219	0.00680163
database_2009_09_30_Traj1_R.mat	E1_13324.xls	1	0.0351617	25.6448	1.10507	0.00520563
database_2009_09_30_Traj1_R.mat	E1_13654.xls	1	0.0415246	27.6299	0.945909	0.000240416
database_2009_09_30_Traj1_R.mat	E1_13990.xls	1	0.601558	1.0194	1.09583	0.000244951
database_2009_09_30_Traj1_R.mat	E1_14318.xls	1	0.589219	16.6204	2.20417	0.000578984
database_2009_09_30_Traj1_R.mat	E1_14673.xls	1	0.444958	12.6223	1.33971	0.000362149
database_2009_09_30_Traj1_R.mat	E1_15000.xls	1	0.0817436	38.4825	0.962047	0.00024754
database_2009_09_30_Traj1_R.mat	E2_10712.xls	1	0.672387	67.2666	1.69925	0.000176738
database_2009_09_30_Traj1_R.mat	E2_10941.xls	1	0.265173	38.0591	0.794015	0.00015017
database_2009_09_30_Traj1_R.mat	E2_11088.xls	1	0.0444419	24.9411	0.92279	0.000133032
database_2009_09_30_Traj1_R.mat	E2_11500.xls	1	0.45518	13.3897	3.84553	0.000396099
database_2009_09_30_Traj1_R.mat	E2_11654.xls	1	0.0561241	22.9115	1.03491	0.000245631
database_2009_09_30_Traj1_R.mat	E2_11818.xls	1	0.131004	71.6593	0.914159	0.000554239
database_2009_09_30_Traj1_R.mat	E2_12069.xls	1	0.118719	68.9997	0.881245	0.000580017
database_2009_09_30_Traj1_R.mat	E2_12401.xls	1	0.0954959	44.5149	0.967367	0.0063494
database_2009_09_30_Traj1_R.mat	E2_12630.xls	1	0.0588971	33.6061	0.991906	0.000140652
database_2009_09_30_Traj1_R.mat	E2_12955.xls	1	0.064369	33.2255	0.85815	0.000281387
database_2009_09_30_Traj1_R.mat	E2_13324.xls	1	0.0524847	33.3273	0.930728	0.000152983
database_2009_09_30_Traj1_R.mat	E2_13654.xls	1	0.150808	79.1836	0.878333	0.000361706
database_2009_09_30_Traj1_R.mat	E2_13990.xls	1	0.100152	43.4379	0.902672	0.000355999
database_2009_09_30_Traj1_R.mat	E2_14318.xls	1	0.0943055	33.7241	1.03984	0.000351155
database_2009_09_30_Traj1_R.mat	E2_15000.xls	1	0.580516	8.46465	1.28641	0.000416278
database_2009_09_30_Traj1_R.mat	E1_10793.xls	2	0.121638	33.1206	1.07362	0.000215009
database_2009_09_30_Traj1_R.mat	E1_10941.xls	2	0.0626243	38.3517	1.00771	0.0001869
database_2009_09_30_Traj1_R.mat	E1_11088.xls	2	0.0682316	44.176	0.922682	9.58723e-05
database_2009_09_30_Traj1_R.mat	E1_11334.xls	2	0.0468984	24.8732	1.03454	8.88098e-05
database_2009_09_30_Traj1_R.mat	E1_11500.xls	2	0.0411086	17.5081	1.04384	9.1401e-05
database_2009_09_30_Traj1_R.mat	E1_11654.xls	2	0.0374291	26.7007	0.944479	9.20177e-05
database_2009_09_30_Traj1_R.mat	E1_11818.xls	2	0.0393229	18.7241	0.984205	0.000102885
database_2009_09_30_Traj1_R.mat	E1_12069.xls	2	0.100891	63.5904	0.89499	0.000382872
database_2009_09_30_Traj1_R.mat	E1_12401.xls	2	0.032439	21.5435	0.958513	0.000119988
database_2009_09_30_Traj1_R.mat	E1_12630.xls	2	0.0938608	69.0328	0.906255	0.000237733
database_2009_09_30_Traj1_R.mat	E1_12955.xls	2	0.129724	17.8887	1.1333	0.00680163
database_2009_09_30_Traj1_R.mat	E1_13324.xls	2	0.502752	14.599	1.87874	0.00520563
database_2009_09_30_Traj1_R.mat	E1_13654.xls	2	0.0761494	24.5684	0.92807	0.000240416
database_2009_09_30_Traj1_R.mat	E1_13990.xls	2	0.116105	69.6901	0.887239	0.000244951
database_2009_09_30_Traj1_R.mat	E1_14318.xls	2	0.133691	55.9596	1.05922	0.000578984
database_2009_09_30_Traj1_R.mat	E1_14673.xls	2	0.110875	65.7389	0.901334	0.000362149
database_2009_09_30_Traj1_R.mat	E1_15000.xls	2	0.350894	2.00141	2.2092	0.00024754
database_2009_09_30_Traj1_R.mat	E2_10712.xls	2	0.114356	55.7084	0.93176	0.000176738
database_2009_09_30_Traj1_R.mat	E2_10941.xls	2	0.0911416	59.3697	0.879935	0.00015017
database_2009_09_30_Traj1_R.mat	E2_11088.xls	2	0.0851789	15.8381	0.972026	0.000133032
database_2009_09_30_Traj1_R.mat	E2_11500.xls	2	0.0956394	71.0664	0.893855	0.000396099
database_2009_09_30_Traj1_R.mat	E2_11654.xls	2	0.0605217	20.2679	0.939296	0.000245631
database_2009_09_30_Traj1_R.mat	E2_11818.xls	2	0.728795	14.15	1.83074	0.000554239
database_2009_09_30_Traj1_R.mat	E2_12069.xls	2	0.812947	3.10662	4.64139	0.000580017
database_2009_09_30_Traj1_R.mat	E2_12401.xls	2	0.264914	11.4285	1.57119	0.0063494
database_2009_09_30_Traj1_R.mat	E2_12630.xls	2	0.0700338	20.6827	0.997436	0.000140652
database_2009_09_30_Traj1_R.mat	E2_12955.xls	2	0.152914	0.188781	0.399884	0.000281387
database_2009_09_30_Traj1_R.mat	E2_13324.xls	2	0.110859	24.4451	0.955441	0.000152983
database_2009_09_30_Traj1_R.mat	E2_13654.xls	2	0.800733	3.02198	1.84314	0.000361706
database_2009_09_30_Traj1_R.mat	E2_13990.xls	2	0.610107	8.5482	2.24398	0.000355999
database_2009_09_30_Traj1_R.mat	E2_14318.xls	2	0.0741824	49.6851	0.883637	0.000351155
database_2009_09_30_Traj1_R.mat	E2_15000.xls	2	0.0994603	75.8647	0.850569	0.000416278
database_2009_09_30_Traj1_R.mat	E1_11334.xls	3	0.046657	26.8393	0.996857	8.88098e-05
database_2009_09_30_Traj1_R.mat	E1_11500.xls	3	0.0404307	22.226	1.02084	9.1401e-05
database_2009_09_30_Traj1_R.mat	E1_11654.xls	3	0.0456389	27.514	0.970481	9.20177e-05
database_2009_09_30_Traj1_R.mat	E1_11818.xls	3	0.0529702	25.7547	0.985521	0.000102885
database_2009_09_30_Traj1_R.mat	E1_12401.xls	3	0.0435833	15.5863	1.03709	0.000119988
database_2009_09_30_Traj1_R.mat	E1_13324.xls	3	0.0728808	33.4849	1.05116	0.00520563
database_2009_09_30_Traj1_R.mat	E1_13654.xls	3	0.942796	1.91343	1.82655	0.000240416
database_2009_09_30_Traj1_R.mat	E1_15000.xls	3	0.0555023	32.3396	0.961755	0.00024754
database_2009_09_30_Traj1_R.mat	E2_11088.xls	3	0.0618166	28.4665	0.962766	0.000133032
database_2009_09_30_Traj1_R.mat	E2_11654.xls	3	0.384598	0.271142	0.361478	0.000245631
database_2009_09_30_Traj1_R.mat	E2_12401.xls	3	0.0442434	25.2551	1.07347	0.0063494
database_2009_09_30_Traj1_R.mat	E2_12630.xls	3	0.0580311	32.7317	0.969972	0.000140652
database_2009_09_30_Traj1_R.mat	E2_12955.xls	3	0.0394832	18.123	0.962308	0.000281387
database_2009_09_30_Traj1_R.mat	E2_13324.xls	3	0.0359523	27.2256	0.976569	0.000152983
database_2009_09_30_Traj1_R.mat	E2_13990.xls	3	0.040867	32.9849	1.00335	0.000355999
database_2009_09_30_Traj1_R.mat	E1_11500.xls	4	0.0250245	17.6717	1.0152	9.1401e-05
database_2009_09_30_Traj1_R.mat	E1_11818.xls	4	0.0548413	16.9391	1.04075	0.000102885
database_2009_09_30_Traj1_R.mat	E1_12401.xls	4	0.0220244	17.7594	1.02211	0.000119988
database_2009_09_30_Traj1_R.mat	E1_13324.xls	4	0.107075	0.0772432	0	0.00520563
database_2009_09_30_Traj1_R.mat	E1_13654.xls	4	0.056907	18.9429	1.03502	0.000240416
database_2009_09_30_Traj1_R.mat	E2_11088.xls	4	0.015134	20.7316	0.966161	0.000133032
database_2009_09_30_Traj1_R.mat	E2_11654.xls	4	0.0390143	17.4887	0.996739	0.000245631
database_2009_09_30_Traj1_R.mat	E2_12955.xls	4	0.035611	28.3801	1.00534	0.000281387
database_2009_09_30_Traj1_R.mat	E1_13654.xls	5	0.00249176	4.66876	3.90908	0.000240416
database_2009_09_30_Traj1_R.mat	E2_11654.xls	5	0.0275235	24.0639	0.90921	0.000245631
database_2009_09_30_Traj2_L.mat	E1_12337.xls	1	0.371448	59.7587	0.878953	0.000107296
database_2009_09_30_Traj2_L.mat	E1_12417.xls	1	0.432082	37.4329	1.6141	0.000124198
database_2009_09_30_Traj2_L.mat	E1_12752.xls	1	0.0430886	21.6644	1.00178	0.000105784
database_2009_09_30_Traj2_L.mat	E1_13121.xls	1	0.0508349	19.2029	1.00318	0.000157619
database_2009_09_30_Traj2_L.mat	E1_13454.xls	1	0.0713848	34.9391	0.958554	0.000149627
database_2009_09_30_Traj2_L.mat	E1_13840.xls	1	0.0183241	17.0381	0.906794	0.000106606
database_2009_09_30_Traj2_L.mat	E1_14227.xls	1	0.0768995	37.3544	0.916277	0.000281629
database_2009_09_30_Traj2_L.mat	E1_14614.xls	1	0.087491	37.2438	0.956971	0.00166225
database_2009_09_30_Traj2_L.mat	E1_15000.xls	1	0.0499596	25.6509	0.951341	0.000433607
database_2009_09_30_Traj2_L.mat	E2_11824.xls	1	0.859921	26.6196	0.744757	0.00029773
database_2009_09_30_Traj2_L.mat	E2_11903.xls	1	0.171973	39.7259	1.05727	0.000104421
database_2009_09_30_Traj2_L.mat	E2_12084.xls	1	0.0325054	22.4897	0.949557	0.000107204
database_2009_09_30_Traj2_L.mat	E2_12178.xls	1	0.0378286	25.7356	0.916468	0.000106823
database_2009_09_30_Traj2_L.mat	E2_12258.xls	1	0.0344126	30.5089	1.0088	9.38026e-05
database_2009_09_30_Traj2_L.mat	E2_12337.xls	1	0.0386308	29.727	0.960912	0.000108703
database_2009_09_30_Traj2_L.mat	E2_12752.xls	1	0.0735411	20.4678	0.90421	0.000120445
database_2009_09_30_Traj2_L.mat	E2_13121.xls	1	0.0973632	41.1134	0.95747	0.000129325
database_2009_09_30_Traj2_L.mat	E2_13454.xls	1	0.0496084	28.0201	1.00181	0.00012482
database_2009_09_30_Traj2_L.mat	E2_13840.xls	1	0.228264	25.4036	1.12016	0.00133914
database_2009_09_30_Traj2_L.mat	E2_14227.xls	1	0.0817486	24.8763	0.937192	0.00017504
database_2009_09_30_Traj2_L.mat	E2_15000.xls	1	0.821612	21.08	0.550463	0.000773693
database_2009_09_30_Traj2_L.mat	E1_12337.xls	2	0.0464308	39.6269	0.976159	0.000107296
database_2009_09_30_Traj2_L.mat	E1_12417.xls	2	0.077088	46.1373	1.06207	0.000124198
database_2009_09_30_Traj2_L.mat	E1_12752.xls	2	0.0354756	20.2201	0.979005	0.000105784
database_2009_09_30_Traj2_L.mat	E1_13121.xls	2	0.0250269	16.4515	0.905984	0.000157619
database_2009_09_30_Traj2_L.mat	E1_13454.xls	2	0.0573794	34.6573	0.902753	0.000149627
database_2009_09_30_Traj2_L.mat	E1_13840.xls	2	0.035607	17.8901	0.997079	0.000106606
database_2009_09_30_Traj2_L.mat	E1_14227.xls	2	0.525784	6.08739	1.37456	0.000281629
database_2009_09_30_Traj2_L.mat	E1_14614.xls	2	0.202767	2.77437	1.908	0.00166225
database_2009_09_30_Traj2_L.mat	E1_15000.xls	2	0.0682501	21.3436	1.01973	0.000433607
database_2009_09_30_Traj2_L.mat	E2_11824.xls	2	0.174738	66.6014	0.823583	0.00029773
database_2009_09_30_Traj2_L.mat	E2_11903.xls	2	0.0751264	56.2019	0.924673	0.000104421
database_2009_09_30_Traj2_L.mat	E2_12084.xls	2	0.041206	28.352	0.913925	0.000107204
database_2009_09_30_Traj2_L.mat	E2_12178.xls	2	0.0457887	20.9897	0.962722	0.000106823
database_2009_09_30_Traj2_L.mat	E2_12258.xls	2	0.0571115	30.9456	0.890534	9.38026e-05
database_2009_09_30_Traj2_L.mat	E2_12337.xls	2	0.0454568	29.3331	0.915485	0.000108703
database_2009_09_30_Traj2_L.mat	E2_12752.xls	2	0.0269488	27.0113	0.952386	0.000120445
database_2009_09_30_Traj2_L.mat	E2_13121.xls	2	0.0597131	44.4898	0.93956	0.000129325
database_2009_09_30_Traj2_L.mat	E2_13454.xls	2	0.0372946	22.5287	0.951003	0.00012482
database_2009_09_30_Traj2_L.mat	E2_13840.xls	2	0.0759971	49.1807	0.946178	0.00133914
database_2009_09_30_Traj2_L.mat	E2_14227.xls	2	0.519008	0.368538	1.65432	0.00017504
database_2009_09_30_Traj2_L.mat	E2_15000.xls	2	0.0999747	63.8197	0.890697	0.000773693
database_2009_09_30_Traj2_L.mat	E1_12752.xls	3	0.0419061	14.5949	0.925521	0.000105784
database_2009_09_30_Traj2_L.mat	E1_13121.xls	3	0.614635	1.33314	1.16831	0.000157619
database_2009_09_30_Traj2_L.mat	E1_13454.xls	3	0.258816	15.2154	0.850609	0.000149627
database_2009_09_30_Traj2_L.mat	E1_13840.xls	3	0.0228621	16.6509	0.950414	0.000106606
database_2009_09_30_Traj2_L.mat	E1_14227.xls	3	0.0331396	29.0535	1.04561	0.000281629
database_2009_09_30_Traj2_L.mat	E1_14614.xls	3	0.0309236	31.5269	0.985269	0.00166225
database_2009_09_30_Traj2_L.mat	E1_15000.xls	3	0.0505642	26.7326	0.961314	0.000433607
database_2009_09_30_Traj2_L.mat	E2_12084.xls	3	0.026603	20.7311	1.04467	0.000107204
database_2009_09_30_Traj2_L.mat	E2_12178.xls	3	0.0411971	24.5613	1.00792	0.000106823
database_2009_09_30_Traj2_L.mat	E2_12258.xls	3	0.0498995	29.0739	0.984795	9.38026e-05
database_2009_09_30_Traj2_L.mat	E2_12337.xls	3	0.0565094	30.9088	1.02365	0.000108703
database_2009_09_30_Traj2_L.mat	E2_12752.xls	3	0.252131	6.31533	1.09512	0.000120445
database_2009_09_30_Traj2_L.mat	E2_13121.xls	3	0.721447	0.255363	1.56737	0.000129325
database_2009_09_30_Traj2_L.mat	E2_13454.xls	3	0.0914776	14.7845	0.979612	0.00012482
database_2009_09_30_Traj2_L.mat	E2_14227.xls	3	0.053897	30.7729	0.967382	0.00017504
database_2009_09_30_Traj2_L.mat	E1_12752.xls	4	0.013704	18.1677	1.0576	0.000105784
database_2009_09_30_Traj2_L.mat	E1_13121.xls	4	0.0274358	16.1962	1.00994	0.000157619
database_2009_09_30_Traj2_L.mat	E1_13840.xls	4	0.0265831	15.9539	1.21722	0.000106606
database_2009_09_30_Traj2_L.mat	E1_15000.xls	4	0.997762	0.154523	0.75202	0.000433607
database_2009_09_30_Traj2_L.mat	E2_12084.xls	4	0.0187377	17.4802	0.927963	0.000107204
database_2009_09_30_Traj2_L.mat	E2_12178.xls	4	0.021319	16.8798	1.09809	0.000106823
database_2009_09_30_Traj2_L.mat	E2_12752.xls	4	0.0830746	26.5548	0.972615	0.000120445
database_2009_09_30_Traj2_L.mat	E2_13454.xls	4	0.045856	17.0373	0.982631	0.00012482
database_2009_09_30_Traj2_L.mat	E2_14227.xls	4	0.0472675	29.0224	1.01623	0.00017504
database_2009_09_30_Traj2_L.mat	E1_13121.xls	5	0.0280113	21.699	0.953387	0.000157619
database_2009_09_30_Traj2_L.mat	E2_12752.xls	5	0.0162823	16.8155	1.0288	0.000120445
database_2009_10_19_Traj1_R.mat	E2_11207.xls	1	0.249184	27.4158	1.04516	0.000254148
database_2009_10_19_Traj1_R.mat	E2_11544.xls	1	0.0347655	24.7272	1.15088	8.83758e-05
database_2009_10_19_Traj1_R.mat	E2_11957.xls	1	0.0481286	27.786	0.869648	0.000160609
database_2009_10_19_Traj1_R.mat	E2_12933.xls	1	0.0786548	38.3491	1.1799	0.000720314
database_2009_10_19_Traj1_R.mat	E2_13629.xls	1	0.0694535	28.9676	1.01413	0.000146747
database_2009_10_19_Traj1_R.mat	E2_13998.xls	1	0.0967583	40.8981	0.939096	0.000984969
database_2009_10_19_Traj1_R.mat	E2_14330.xls	1	0.110642	68.0914	0.945525	0.0004657
database_2009_10_19_Traj1_R.mat	E2_14673.xls	1	0.123668	70.3424	0.88593	0.000890098
database_2009_10_19_Traj1_R.mat	E2_15000.xls	1	0.0991972	69.4759	0.890986	0.000877834
database_2009_10_19_Traj1_R.mat	E2_11207.xls	2	0.0874623	60.1426	0.927424	0.000254148
database_2009_10_19_Traj1_R.mat	E2_11544.xls	2	0.0606488	28.2989	0.972173	8.83758e-05
database_2009_10_19_Traj1_R.mat	E2_11957.xls	2	0.102331	24.5247	0.988144	0.000160609
database_2009_10_19_Traj1_R.mat	E2_12933.xls	2	0.441643	5.76304	2.09716	0.000720314
database_2009_10_19_Traj1_R.mat	E2_13629.xls	2	0.129107	26.5346	0.959963	0.000146747
database_2009_10_19_Traj1_R.mat	E2_13998.xls	2	0.883483	2.83537	1.60684	0.000984969
database_2009_10_19_Traj1_R.mat	E2_14330.xls	2	0.527735	18.7663	3.73471	0.0004657
database_2009_10_19_Traj1_R.mat	E2_14673.xls	2	0.507151	3.24517	1.66026	0.000890098
database_2009_10_19_Traj1_R.mat	E2_15000.xls	2	0.777478	18.7904	1.35191	0.000877834
database_2009_10_19_Traj1_R.mat	E2_11544.xls	3	0.0618052	18.8201	0.964152	8.83758e-05
database_2009_10_19_Traj1_R.mat	E2_11957.xls	3	0.0392621	21.5244	0.956198	0.000160609
database_2009_10_19_Traj1_R.mat	E2_12933.xls	3	0.0606839	42.4757	0.969522	0.000720314
database_2009_10_19_Traj1_R.mat	E2_13629.xls	3	0.0586119	31.8948	1.01325	0.000146747
database_2009_10_19_Traj1_R.mat	E2_13998.xls	3	0.0360092	25.3465	0.893737	0.000984969
database_2009_10_19_Traj1_R.mat	E2_11544.xls	4	0.0355893	17.0343	0.995076	8.83758e-05
database_2009_10_19_Traj2_L.mat	E1_10368.xls	1	0.0504877	33.9215	0.919038	0.000154629
database_2009_10_19_Traj2_L.mat	E1_10544.xls	1	0.585906	5.79582	0.99757	0.000252919
database_2009_10_19_Traj2_L.mat	E1_10720.xls	1	0.0535661	24.8462	0.946728	0.000155757
database_2009_10_19_Traj2_L.mat	E1_10912.xls	1	0.0741087	38.1878	0.966284	0.000147027
database_2009_10_19_Traj2_L.mat	E1_10913.xls	1	0.0341842	23.3144	1.01645	0.000114902
database_2009_10_19_Traj2_L.mat	E1_11105.xls	1	0.0586003	26.2654	1.05643	0.000224781
database_2009_10_19_Traj2_L.mat	E1_11304.xls	1	0.061253	19.7927	1.12746	0.000185395
database_2009_10_19_Traj2_L.mat	E1_11497.xls	1	0.0168347	16.3991	0.979477	0.000138472
database_2009_10_19_Traj2_L.mat	E1_11695.xls	1	0.0368119	21.2791	1.18522	0.00526186
database_2009_10_19_Traj2_L.mat	E1_11895.xls	1	0.0395856	21.954	0.977462	0.000159685
database_2009_10_19_Traj2_L.mat	E1_12088.xls	1	0.10507	36.4848	0.956932	0.000227785
database_2009_10_19_Traj2_L.mat	E1_12264.xls	1	0.0429094	23.3362	0.91843	0.000156837
database_2009_10_19_Traj2_L.mat	E1_12442.xls	1	0.05382	19.4925	1.07697	0.000465151
database_2009_10_19_Traj2_L.mat	E1_12697.xls	1	0.84629	5.49985	3.97454	0.000977866
database_2009_10_19_Traj2_L.mat	E1_13030.xls	1	0.0781192	45.5741	0.991547	0.0058615
database_2009_10_19_Traj2_L.mat	E1_13279.xls	1	0.0960378	17.4402	0.941804	0.000197176
database_2009_10_19_Traj2_L.mat	E1_13648.xls	1	0.0398081	23.041	0.903487	0.000131466
database_2009_10_19_Traj2_L.mat	E1_14017.xls	1	0.589703	2.05612	0.98206	0.000833241
database_2009_10_19_Traj2_L.mat	E1_14386.xls	1	0.0781048	35.3402	0.943718	0.000224113
database_2009_10_19_Traj2_L.mat	E1_14756.xls	1	0.0903313	18.1814	1.12732	0.000392848
database_2009_10_19_Traj2_L.mat	E1_15000.xls	1	0.0368294	16.5939	0.910291	0.000146777
database_2009_10_19_Traj2_L.mat	E2_10191.xls	1	0.118027	98.8124	0.812933	0.00043918
database_2009_10_19_Traj2_L.mat	E2_10368.xls	1	0.0372258	29.2298	0.925987	0.000131332
database_2009_10_19_Traj2_L.mat	E2_10544.xls	1	0.237042	2.52618	0.609149	0.000617951
database_2009_10_19_Traj2_L.mat	E2_10720.xls	1	0.494765	11.2595	1.31267	0.000333078
database_2009_10_19_Traj2_L.mat	E2_10912.xls	1	0.0430987	19.0066	0.993472	0.000942471
database_2009_10_19_Traj2_L.mat	E2_10913.xls	1	0.0510864	29.6848	1.00573	0.0001729
database_2009_10_19_Traj2_L.mat	E2_11105.xls	1	0.0859322	23.2651	0.825834	0.000317207
database_2009_10_19_Traj2_L.mat	E2_11304.xls	1	0.0372531	24.6503	0.972585	0.000143654
database_2009_10_19_Traj2_L.mat	E2_11497.xls	1	0.0371156	22.4906	1.02819	0.000140509
database_2009_10_19_Traj2_L.mat	E2_11895.xls	1	0.0814819	10.3409	1.55373	0.000173093
database_2009_10_19_Traj2_L.mat	E2_12088.xls	1	0.675018	17.0597	1.32301	0.00125379
database_2009_10_19_Traj2_L.mat	E2_13030.xls	1	0.106286	66.0213	0.892167	0.00503718
database_2009_10_19_Traj2_L.mat	E2_13279.xls	1	0.0586002	28.7017	0.965408	0.000124501
database_2009_10_19_Traj2_L.mat	E2_13648.xls	1	0.11078	45.9096	1.00855	0.000166038
database_2009_10_19_Traj2_L.mat	E2_14386.xls	1	0.37292	21.9803	2.7922	0.000134629
database_2009_10_19_Traj2_L.mat	E2_15000.xls	1	0.0492236	34.6767	0.980405	0.000249829
database_2009_10_19_Traj2_L.mat	E1_10368.xls	2	0.409781	13.5686	0.979009	0.000154629
database_2009_10_19_Traj2_L.mat	E1_10544.xls	2	0.127331	68.1009	0.864683	0.000252919
database_2009_10_19_Traj2_L.mat	E1_10720.xls	2	0.0160397	16.1852	0.938808	0.000155757
database_2009_10_19_Traj2_L.mat	E1_10912.xls	2	0.0662739	40.4791	0.944985	0.000147027
database_2009_10_19_Traj2_L.mat	E1_10913.xls	2	0.049824	14.1837	1.10691	0.000114902
database_2009_10_19_Traj2_L.mat	E1_11105.xls	2	0.583654	0.452852	0.990622	0.000224781
database_2009_10_19_Traj2_L.mat	E1_11304.xls	2	0.0324148	23.6261	0.883857	0.000185395
database_2009_10_19_Traj2_L.mat	E1_11497.xls	2	0.0471734	13.7979	0.948258	0.000138472
database_2009_10_19_Traj2_L.mat	E1_11695.xls	2	0.100976	22.7359	1.01793	0.00526186
database_2009_10_19_Traj2_L.mat	E1_11895.xls	2	0.0873265	13.6316	0.928174	0.000159685
database_2009_10_19_Traj2_L.mat	E1_12088.xls	2	0.518704	5.74043	2.93329	0.000227785
database_2009_10_19_Traj2_L.mat	E1_12264.xls	2	0.021709	14.6287	1.22434	0.000156837
database_2009_10_19_Traj2_L.mat	E1_12442.xls	2	0.380742	6.55999	2.52643	0.000465151
database_2009_10_19_Traj2_L.mat	E1_12697.xls	2	0.109139	60.8302	0.899243	0.000977866
database_2009_10_19_Traj2_L.mat	E1_13279.xls	2	0.0188748	15.4369	1.1714	0.000197176
database_2009_10_19_Traj2_L.mat	E1_13648.xls	2	0.0380731	14.9398	0.992985	0.000131466
database_2009_10_19_Traj2_L.mat	E1_14017.xls	2	0.0773183	56.886	0.935327	0.000833241
database_2009_10_19_Traj2_L.mat	E1_14386.xls	2	0.844612	3.16316	0.761946	0.000224113
database_2009_10_19_Traj2_L.mat	E1_14756.xls	2	0.0296314	15.0167	1.21457	0.000392848
database_2009_10_19_Traj2_L.mat	E1_15000.xls	2	0.0817164	19.9365	1.06029	0.000146777
database_2009_10_19_Traj2_L.mat	E2_10191.xls	2	0.634715	3.35933	1.0478	0.00043918
database_2009_10_19_Traj2_L.mat	E2_10368.xls	2	0.114184	14.7889	0.99691	0.000131332
database_2009_10_19_Traj2_L.mat	E2_10544.xls	2	0.123934	80.8042	0.885356	0.000617951
database_2009_10_19_Traj2_L.mat	E2_10720.xls	2	0.675792	2.92314	1.19714	0.000333078
database_2009_10_19_Traj2_L.mat	E2_10912.xls	2	0.0162705	16.4217	0.993663	0.000942471
database_2009_10_19_Traj2_L.mat	E2_10913.xls	2	0.0682904	21.0895	0.939146	0.0001729
database_2009_10_19_Traj2_L.mat	E2_11105.xls	2	0.0114378	10.3199	1.07348	0.000317207
database_2009_10_19_Traj2_L.mat	E2_11304.xls	2	0.0544462	25.5893	0.973644	0.000143654
database_2009_10_19_Traj2_L.mat	E2_11497.xls	2	0.0207494	12.9971	1.27354	0.000140509
database_2009_10_19_Traj2_L.mat	E2_11895.xls	2	0.0558919	23.698	0.96333	0.000173093
database_2009_10_19_Traj2_L.mat	E2_12088.xls	2	0.150903	69.2878	0.960142	0.00125379
database_2009_10_19_Traj2_L.mat	E2_13279.xls	2	0.0779777	34.1127	1.00076	0.000124501
database_2009_10_19_Traj2_L.mat	E2_13648.xls	2	0.303186	16.704	1.67721	0.000166038
database_2009_10_19_Traj2_L.mat	E2_14386.xls	2	0.103997	65.7223	0.945902	0.000134629
database_2009_10_19_Traj2_L.mat	E2_15000.xls	2	0.0848783	23.3665	1.07458	0.000249829
database_2009_10_19_Traj2_L.mat	E1_10368.xls	3	0.0428282	32.8778	0.906097	0.000154629
database_2009_10_19_Traj2_L.mat	E1_10720.xls	3	0.370972	4.11396	1.04933	0.000155757
database_2009_10_19_Traj2_L.mat	E1_10913.xls	3	0.0278997	24.91	0.956788	0.000114902
database_2009_10_19_Traj2_L.mat	E1_11105.xls	3	0.0921428	18.4764	1.0084	0.000224781
database_2009_10_19_Traj2_L.mat	E1_11304.xls	3	0.0656847	16.194	1.09453	0.000185395
database_2009_10_19_Traj2_L.mat	E1_11497.xls	3	0.0561603	22.9587	1.01654	0.000138472
database_2009_10_19_Traj2_L.mat	E1_11695.xls	3	0.0315296	19.4249	1.0022	0.00526186
database_2009_10_19_Traj2_L.mat	E1_11895.xls	3	0.0202875	23.389	0.891208	0.000159685
database_2009_10_19_Traj2_L.mat	E1_12088.xls	3	0.0463073	30.5236	0.908104	0.000227785
database_2009_10_19_Traj2_L.mat	E1_12264.xls	3	0.0448587	13.9321	1.01986	0.000156837
database_2009_10_19_Traj2_L.mat	E1_12442.xls	3	0.055199	22.0228	0.892853	0.000465151
database_2009_10_19_Traj2_L.mat	E1_13279.xls	3	0.268606	3.18165	0.710927	0.000197176
database_2009_10_19_Traj2_L.mat	E1_13648.xls	3	0.016036	2.63025	1.40772	0.000131466
database_2009_10_19_Traj2_L.mat	E1_14386.xls	3	0.0669129	42.2119	1.24674	0.000224113
database_2009_10_19_Traj2_L.mat	E1_14756.xls	3	0.876224	2.54415	4.77764	0.000392848
database_2009_10_19_Traj2_L.mat	E1_15000.xls	3	0.0211514	2.14885	1.68738	0.000146777
database_2009_10_19_Traj2_L.mat	E2_10368.xls	3	0.0510553	27.577	0.972652	0.000131332
database_2009_10_19_Traj2_L.mat	E2_10720.xls	3	0.0585803	38.1632	0.896776	0.000333078
database_2009_10_19_Traj2_L.mat	E2_10912.xls	3	0.114625	18.8545	0.878238	0.000942471
database_2009_10_19_Traj2_L.mat	E2_10913.xls	3	1	0.443057	1.95799	0.0001729
database_2009_10_19_Traj2_L.mat	E2_11105.xls	3	0.768083	1.08631	1.03105	0.000317207
database_2009_10_19_Traj2_L.mat	E2_11304.xls	3	0.039284	16.4335	0.953476	0.000143654
database_2009_10_19_Traj2_L.mat	E2_11497.xls	3	0.0709969	15.5965	1.02301	0.000140509
database_2009_10_19_Traj2_L.mat	E2_11895.xls	3	0.996621	1.14899	1.98489	0.000173093
database_2009_10_19_Traj2_L.mat	E2_13279.xls	3	0.0630701	34.9361	0.961348	0.000124501
database_2009_10_19_Traj2_L.mat	E2_13648.xls	3	0.0376888	28.8905	1.08421	0.000166038
database_2009_10_19_Traj2_L.mat	E2_15000.xls	3	0.0476013	31.6328	0.996234	0.000249829
database_2009_10_19_Traj2_L.mat	E1_10720.xls	4	0.0224272	15.9145	1.03382	0.000155757
database_2009_10_19_Traj2_L.mat	E1_10913.xls	4	0.0580649	23.669	0.997861	0.000114902
database_2009_10_19_Traj2_L.mat	E1_11105.xls	4	0.055923	32.7865	0.948752	0.000224781
database_2009_10_19_Traj2_L.mat	E1_11304.xls	4	0.0982823	2.81635	1.99969	0.000185395
database_2009_10_19_Traj2_L.mat	E1_11497.xls	4	0.0420089	11.3097	1.11384	0.000138472
database_2009_10_19_Traj2_L.mat	E1_11895.xls	4	0.0530182	14.2056	1.03286	0.000159685
database_2009_10_19_Traj2_L.mat	E1_12264.xls	4	0.0281959	16.7185	1.05568	0.000156837
database_2009_10_19_Traj2_L.mat	E1_12442.xls	4	0.0419437	25.0217	0.938044	0.000465151
database_2009_10_19_Traj2_L.mat	E1_13279.xls	4	0.0339966	14.4942	1.01439	0.000197176
database_2009_10_19_Traj2_L.mat	E1_13648.xls	4	0.0770177	16.3075	1.00951	0.000131466
database_2009_10_19_Traj2_L.mat	E1_14756.xls	4	0.0536975	14.6444	1.02477	0.000392848
database_2009_10_19_Traj2_L.mat	E1_15000.xls	4	0.0226886	19.7575	0.972939	0.000146777
database_2009_10_19_Traj2_L.mat	E2_10368.xls	4	0.0242988	19.5736	0.891004	0.000131332
database_2009_10_19_Traj2_L.mat	E2_10720.xls	4	0.0423259	33.7785	0.908754	0.000333078
database_2009_10_19_Traj2_L.mat	E2_10912.xls	4	0.0699432	21.5915	0.917747	0.000942471
database_2009_10_19_Traj2_L.mat	E2_10913.xls	4	0.0697889	25.6973	0.888674	0.0001729
database_2009_10_19_Traj2_L.mat	E2_11105.xls	4	0.0859113	19.5535	0.859843	0.000317207
database_2009_10_19_Traj2_L.mat	E2_11304.xls	4	0.0302002	18.9377	0.982288	0.000143654
database_2009_10_19_Traj2_L.mat	E2_11497.xls	4	0.0376627	15.8225	1.00649	0.000140509
database_2009_10_19_Traj2_L.mat	E2_11895.xls	4	0.0553094	25.1342	1.21501	0.000173093
database_2009_10_19_Traj2_L.mat	E1_10720.xls	5	0.0267987	19.2707	1.08242	0.000155757
database_2009_10_19_Traj2_L.mat	E1_11304.xls	5	0.0278037	13.5341	1.49195	0.000185395
database_2009_10_19_Traj2_L.mat	E1_13279.xls	5	0.0375925	21.211	0.989233	0.000197176
database_2009_10_19_Traj2_L.mat	E1_13648.xls	5	0.0190182	18.4117	0.974541	0.000131466
database_2009_10_19_Traj2_L.mat	E1_14756.xls	5	0.0238546	18.8019	1.02893	0.000392848
database_2009_10_19_Traj2_L.mat	E1_15000.xls	5	0.0238652	15.7582	1.02348	0.000146777
database_2009_10_19_Traj2_L.mat	E2_10913.xls	5	0.0368655	17.4565	0.907391	0.0001729
database_2009_10_19_Traj2_L.mat	E2_11105.xls	5	0.0734731	28.6966	0.940769	0.000317207
database_2009_10_19_Traj2_L.mat	E2_11497.xls	5	0.0218067	16.3876	0.983376	0.000140509
database_2009_10_19_Traj2_L.mat	E2_11895.xls	5	0.0532041	22.2618	0.952573	0.000173093
database_2014_09_02_Traj1_R.mat	E1_RT1D12.932F0001.xls	1	0.0470076	39.7678	0.924688	0.000116674	1.89278e-06
database_2014_09_02_Traj1_R.mat	E1_RT1D13.217F0001.xls	1	0.0362512	34.2433	0.926375	4.96186e-05	1.1025e-06
database_2014_09_02_Traj1_R.mat	E1_RT1D13.400F0001.xls	1	0.058192	44.1837	0.858124	5.43236e-05	4.04434e-08
database_2014_09_02_Traj1_R.mat	E1_RT1D13.757F0001.xls	1	0.037636	29.4919	1.19717	7.07022e-05	2.06538e-05
database_2014_09_02_Traj1_R.mat	E1_RT1D13.829F0001.xls	1	0.204542	47.01	0.87159	0.000126569	3.252e-07
database_2014_09_02_Traj1_R.mat	E1_RT1D13.947F0001.xls	1	0.180042	50.7306	0.794289	0.000102077	3.2179e-07
database_2014_09_02_Traj1_R.mat	E1_RT1D14.023F0001.xls	1	0.0578221	31.003	0.916658	8.05632e-05	1.74254e-06
database_2014_09_02_Traj1_R.mat	E1_RT1D14.122F0001.xls	1	0.0643534	40.1279	0.920817	6.35205e-05	1.40287e-06
database_2014_09_02_Traj1_R.mat	E1_RT1D14.395F0001.xls	1	0.0712208	37.6426	0.851712	9.1607e-05	1.40461e-06
database_2014_09_02_Traj1_R.mat	E1_RT1D14.546F0001.xls	1	0.0793153	40.9379	0.941856	0.000193073	3.6754e-06
database_2014_09_02_Traj1_R.mat	E1_RT1D14.817F0001.xls	1	0.661344	14.2294	1.29086	0.000373924	1.34542e-06
database_2014_09_02_Traj1_R.mat	E1_RT1D14.939F0001.xls	1	0.0471859	42.7182	0.874303	4.62755e-05	9.57389e-07
database_2014_09_02_Traj1_R.mat	E2_RT1D13.829F0001.xls	1	0.817396	11.1855	1.016	0.00079535	1.57729e-05
database_2014_09_02_Traj1_R.mat	E2_RT1D13.947F0001.xls	1	0.0433318	36.4307	0.952743	5.11735e-05	1.37197e-06
database_2014_09_02_Traj1_R.mat	E2_RT1D14.023F0001.xls	1	0.0338856	38.4299	0.912312	4.58543e-05	2.13996e-06
database_2014_09_02_Traj1_R.mat	E2_RT1D14.122F0001.xls	1	0.031399	34.6483	0.905951	3.62186e-05	5.77166e-06
database_2014_09_02_Traj1_R.mat	E2_RT1D14.395F0001.xls	1	0.027577	27.5415	0.889614	5.79603e-05	2.52972e-06
database_2014_09_02_Traj1_R.mat	E2_RT1D14.546F0001.xls	1	0.342432	10.8373	1.93568	0.000296829	2.36505e-06
database_2014_09_02_Traj1_R.mat	E2_RT1D14.817F0001.xls	1	0.0827251	42.273	0.897421	0.000108612	1.42991e-06
database_2014_09_02_Traj1_R.mat	E2_RT1D14.939F0001.xls	1	0.06357	28.5591	0.964334	0.000154704	1.38773e-06
database_2014_09_02_Traj1_R.mat	E1_RT1D12.932F0001.xls	2	0.0752386	38.5119	0.976427	0.000116674	5.18369e-06
database_2014_09_02_Traj1_R.mat	E1_RT1D13.217F0001.xls	2	0.0565178	39.9312	0.878821	4.96186e-05	1.7346e-06
database_2014_09_02_Traj1_R.mat	E1_RT1D13.400F0001.xls	2	0.0461861	41.0914	0.899312	5.43236e-05	7.70406e-08
database_2014_09_02_Traj1_R.mat	E1_RT1D13.757F0001.xls	2	0.102992	27.5258	0.863996	7.07022e-05	1.33183e-05
database_2014_09_02_Traj1_R.mat	E1_RT1D13.829F0001.xls	2	0.0898765	92.8477	0.809869	0.000126569	9.95176e-08
database_2014_09_02_Traj1_R.mat	E1_RT1D13.947F0001.xls	2	0.0768331	79.9852	0.877271	0.000102077	2.01932e-07
database_2014_09_02_Traj1_R.mat	E1_RT1D14.023F0001.xls	2	0.0541742	32.5532	0.944444	8.05632e-05	3.14701e-06
database_2014_09_02_Traj1_R.mat	E1_RT1D14.122F0001.xls	2	0.0590903	35.4162	0.906614	6.35205e-05	1.31447e-06
database_2014_09_02_Traj1_R.mat	E1_RT1D14.395F0001.xls	2	0.0428836	24.0186	0.876643	9.1607e-05	2.96379e-06
database_2014_09_02_Traj1_R.mat	E1_RT1D14.546F0001.xls	2	0.488344	1.9319	0.730897	0.000193073	5.89337e-05
database_2014_09_02_Traj1_R.mat	E1_RT1D14.817F0001.xls	2	0.0910637	90.7062	0.766017	0.000373924	1.29529e-07
database_2014_09_02_Traj1_R.mat	E1_RT1D14.939F0001.xls	2	0.0572995	41.977	0.961008	4.62755e-05	7.01158e-07
database_2014_09_02_Traj1_R.mat	E2_RT1D13.829F0001.xls	2	0.0791272	76.1647	0.808084	0.00079535	3.91728e-07
database_2014_09_02_Traj1_R.mat	E2_RT1D13.947F0001.xls	2	0.0511766	32.7961	0.839236	5.11735e-05	2.81432e-06
database_2014_09_02_Traj1_R.mat	E2_RT1D14.023F0001.xls	2	0.0537566	45.1046	0.865428	4.58543e-05	3.55946e-06
database_2014_09_02_Traj1_R.mat	E2_RT1D14.122F0001.xls	2	0.063975	40.6195	0.892681	3.62186e-05	3.09969e-06
database_2014_09_02_Traj1_R.mat	E2_RT1D14.395F0001.xls	2	0.0716833	30.4671	0.956234	5.79603e-05	3.39971e-06
database_2014_09_02_Traj1_R.mat	E2_RT1D14.546F0001.xls	2	0.114673	115.444	0.715511	0.000296829	3.80003e-07
database_2014_09_02_Traj1_R.mat	E2_RT1D14.817F0001.xls	2	0.0396159	32.8301	0.938845	0.000108612	3.89789e-07
database_2014_09_02_Traj1_R.mat	E2_RT1D14.939F0001.xls	2	0.0575067	41.9629	0.884932	0.000154704	1.21742e-06
database_2014_09_02_Traj1_R.mat	E1_RT1D12.932F0001.xls	3	0.0604173	23.4421	0.910582	0.000116674	8.11725e-06
database_2014_09_02_Traj1_R.mat	E1_RT1D13.217F0001.xls	3	0.0386353	42.9493	0.954969	4.96186e-05	1.25995e-06
database_2014_09_02_Traj1_R.mat	E1_RT1D13.400F0001.xls	3	0.0389852	44.5405	0.967253	5.43236e-05	1.37548e-07
database_2014_09_02_Traj1_R.mat	E1_RT1D13.757F0001.xls	3	0.0457332	38.9294	1.01257	7.07022e-05	1.52353e-05
database_2014_09_02_Traj1_R.mat	E1_RT1D14.023F0001.xls	3	0.0721832	19.3432	0.926279	8.05632e-05	2.12349e-06
database_2014_09_02_Traj1_R.mat	E1_RT1D14.122F0001.xls	3	0.0528428	42.2482	0.926354	6.35205e-05	1.20847e-06
database_2014_09_02_Traj1_R.mat	E1_RT1D14.395F0001.xls	3	0.0361102	32.7985	0.939467	9.1607e-05	1.50956e-06
database_2014_09_02_Traj1_R.mat	E1_RT1D14.546F0001.xls	3	0.0469352	41.2139	0.889432	0.000193073	4.04651e-06
database_2014_09_02_Traj1_R.mat	E1_RT1D14.939F0001.xls	3	0.0638792	46.2893	0.857366	4.62755e-05	1.2103e-06
database_2014_09_02_Traj1_R.mat	E2_RT1D13.947F0001.xls	3	0.0453473	34.5711	0.873027	5.11735e-05	2.32977e-06
database_2014_09_02_Traj1_R.mat	E2_RT1D14.023F0001.xls	3	0.0507522	40.7896	0.899397	4.58543e-05	2.93758e-06
database_2014_09_02_Traj1_R.mat	E2_RT1D14.122F0001.xls	3	0.0244268	25.2988	0.938065	3.62186e-05	3.82175e-06
database_2014_09_02_Traj1_R.mat	E2_RT1D14.395F0001.xls	3	0.0250158	21.2866	0.969367	5.79603e-05	5.12912e-06
database_2014_09_02_Traj1_R.mat	E2_RT1D14.817F0001.xls	3	0.101352	5.03949	1.46759	0.000108612	7.8737e-06
database_2014_09_02_Traj1_R.mat	E2_RT1D14.939F0001.xls	3	0.436468	0.336781	0.701745	0.000154704	0.000203323
database_2014_09_02_Traj1_R.mat	E1_RT1D12.932F0001.xls	4	0.030894	32.1282	0.907803	0.000116674	2.87005e-06
database_2014_09_02_Traj1_R.mat	E1_RT1D14.023F0001.xls	4	0.999455	1.48275	0.396991	8.05632e-05	5.64007e-05
database_2014_09_02_Traj1_R.mat	E1_RT1D14.122F0001.xls	4	0.0316001	33.8457	0.963238	6.35205e-05	4.33064e-07
database_2014_09_02_Traj1_R.mat	E1_RT1D14.395F0001.xls	4	0.0317289	27.4499	0.943112	9.1607e-05	1.37553e-06
database_2014_09_02_Traj1_R.mat	E1_RT1D14.546F0001.xls	4	0.0491435	47.1936	0.89892	0.000193073	1.61146e-06
database_2014_09_02_Traj1_R.mat	E2_RT1D13.947F0001.xls	4	0.0404994	27.809	0.939135	5.11735e-05	5.01848e-06
database_2014_09_02_Traj1_R.mat	E2_RT1D14.122F0001.xls	4	0.044802	35.5911	0.893045	3.62186e-05	2.13091e-06
database_2014_09_02_Traj1_R.mat	E2_RT1D14.395F0001.xls	4	0.0325952	24.0105	0.914673	5.79603e-05	2.62058e-06
database_2014_09_02_Traj1_R.mat	E2_RT1D14.817F0001.xls	4	0.0571286	29.4541	0.854476	0.000108612	1.87618e-06
database_2014_09_02_Traj1_R.mat	E2_RT1D14.939F0001.xls	4	0.0558009	38.4604	0.964062	0.000154704	1.61233e-06
database_2014_09_02_Traj1_R.mat	E1_RT1D14.023F0001.xls	5	0.0263768	31.2726	0.998661	8.05632e-05	2.40615e-06
database_2014_09_02_Traj1_R.mat	E1_RT1D14.395F0001.xls	5	0.233	1.91745	0.693278	9.1607e-05	5.36369e-05
database_2014_09_02_Traj1_R.mat	E2_RT1D14.817F0001.xls	5	0.0432088	37.4781	0.863211	0.000108612	1.29549e-06
database_2014_09_02_Traj1_R.mat	E2_RT1D14.939F0001.xls	5	0.0349486	29.9735	0.978442	0.000154704	3.20143e-06
database_2014_09_02_Traj2_L.mat	E1_LT1D12.867F0001.xls	1	0.61869	27.9617	2.88886	0.000108141	6.71444e-08
database_2014_09_02_Traj2_L.mat	E1_LT1D13.034F0001.xls	1	0.0744494	49.5569	0.893889	9.03659e-05	1.40287e-07
database_2014_09_02_Traj2_L.mat	E1_LT1D13.164F0001.xls	1	0.643132	3.58507	0.83717	0.000209384	2.31234e-06
database_2014_09_02_Traj2_L.mat	E1_LT1D13.310F0001.xls	1	0.331551	59.2987	0.776018	9.83112e-05	7.16905e-08
database_2014_09_02_Traj2_L.mat	E1_LT1D13.443F0001.xls	1	0.0395127	33.2295	0.870128	6.01624e-05	5.97701e-07
database_2014_09_02_Traj2_L.mat	E1_LT1D13.591F0001.xls	1	0.0466459	38.4673	0.902809	4.6194e-05	2.19273e-07
database_2014_09_02_Traj2_L.mat	E1_LT1D13.720F0001.xls	1	0.0338617	42.9084	0.825356	4.23896e-05	2.39271e-06
database_2014_09_02_Traj2_L.mat	E1_LT1D13.834F0001.xls	1	0.0733075	54.3958	0.833267	3.79474e-05	2.49958e-07
database_2014_09_02_Traj2_L.mat	E1_LT1D13.951F0001.xls	1	0.0242783	18.9292	0.858335	3.60636e-05	1.32616e-06
database_2014_09_02_Traj2_L.mat	E1_LT1D14.087F0001.xls	1	0.0370295	33.1435	0.867739	5.00246e-05	9.46501e-07
database_2014_09_02_Traj2_L.mat	E1_LT1D14.238F0001.xls	1	0.0510005	45.8102	0.91351	7.58504e-05	1.21662e-07
database_2014_09_02_Traj2_L.mat	E1_LT1D14.382F0001.xls	1	0.0420384	37.29	0.87937	7.19472e-05	5.23034e-07
database_2014_09_02_Traj2_L.mat	E1_LT1D14.530F0001.xls	1	0.239812	53.6728	0.826079	0.000112388	1.53532e-07
database_2014_09_02_Traj2_L.mat	E1_LT1D14.660F0001.xls	1	0.264055	48.8557	0.788439	0.000161865	3.22918e-07
database_2014_09_02_Traj2_L.mat	E1_LT1D14.739F0001.xls	1	0.338195	30.3077	0.646111	0.00027643	5.89782e-07
database_2014_09_02_Traj2_L.mat	E1_LT1D14.801F0001.xls	1	0.350617	21.4431	0.641031	0.000239856	8.44308e-08
database_2014_09_02_Traj2_L.mat	E1_LT1D14.922F0001.xls	1	0.0425051	42.8911	0.914089	9.73074e-05	2.87215e-07
database_2014_09_02_Traj2_L.mat	E1_LT1D15.002F0003.xls	1	0.05747	47.3036	0.832354	6.26873e-05	8.08053e-08
database_2014_09_02_Traj2_L.mat	E2_LT1D11.871F0001.xls	1	0.0574225	36.9389	0.918561	4.9421e-05	6.00546e-08
database_2014_09_02_Traj2_L.mat	E2_LT1D12.074F0001.xls	1	0.047854	49.6648	0.907863	5.10264e-05	3.72362e-07
database_2014_09_02_Traj2_L.mat	E2_LT1D12.277F0001.xls	1	0.0780953	43.5375	0.877451	6.25758e-05	1.95891e-05
database_2014_09_02_Traj2_L.mat	E2_LT1D12.482F0001.xls	1	0.083994	49.7923	0.841979	4.79903e-05	9.1807e-08
database_2014_09_02_Traj2_L.mat	E2_LT1D12.689F0001.xls	1	0.0489656	31.2815	0.785753	3.92179e-05	1.28068e-06
database_2014_09_02_Traj2_L.mat	E2_LT1D12.867F0001.xls	1	0.0646812	50.2566	0.898214	4.31774e-05	8.85631e-08
database_2014_09_02_Traj2_L.mat	E2_LT1D13.034F0001.xls	1	0.0593925	50.0567	0.87687	4.843e-05	2.4509e-07
database_2014_09_02_Traj2_L.mat	E2_LT1D13.164F0001.xls	1	0.0497302	42.6332	0.88708	6.2134e-05	5.85397e-08
database_2014_09_02_Traj2_L.mat	E2_LT1D13.310F0001.xls	1	0.0486246	36.6872	0.955667	6.61472e-05	2.02125e-07
database_2014_09_02_Traj2_L.mat	E2_LT1D13.443F0001.xls	1	0.0443231	44.0908	0.873673	3.28609e-05	1.7143e-07
database_2014_09_02_Traj2_L.mat	E2_LT1D13.591F0001.xls	1	0.0722564	48.508	0.855165	3.14243e-05	5.34698e-08
database_2014_09_02_Traj2_L.mat	E2_LT1D13.720F0001.xls	1	0.0392164	22.9882	0.943358	5.09429e-05	1.24936e-05
database_2014_09_02_Traj2_L.mat	E2_LT1D13.834F0001.xls	1	0.0349853	35.5578	0.886653	9.0297e-05	1.76094e-07
database_2014_09_02_Traj2_L.mat	E2_LT1D13.951F0001.xls	1	0.0523801	38.4312	1.02532	3.77652e-05	8.35494e-07
[truncated: 322 more rows]
