# Supplementary material for: What is the true discharge rate and pattern of the striatal projection neurons in Parkinson’s disease and Dystonia?
Source: eLife. 2020 Aug 19;9:e57445. doi: 10.7554/eLife.57445 (PMC7462612; doi:10.7554/eLife.57445)
Supplement: Figure 3—source data 5. [file elife-57445-fig3-data5.xls]

## Sheet: Sheet1
DYST_info_Well_IsoUnits
Folder	Filename	Unit id	Iso.Sc	FR	CV ISI	BetaPowerMUA	BetaPowerSTA_LFP
database_2009_01_05_Traj1_R.mat	E2_12151.xls	2	0.629354	13.2604	2.30693	0.000566306
database_2009_01_05_Traj1_R.mat	E2_09864.xls	3	0.619738	1.38138	2.23122	0.000168188
database_2009_01_05_Traj2_L.mat	E1_09863.xls	1	0.645048	36.5722	0.822625	0.00016999
database_2009_01_05_Traj2_L.mat	E1_10974.xls	1	0.671663	16.8388	1.23658	0.00024149
database_2009_01_05_Traj2_L.mat	E2_10253.xls	2	0.726453	5.70749	3.00071	0.000234319
database_2009_01_05_Traj2_L.mat	E2_10429.xls	2	0.617434	25.7303	1.83037	0.000870116
database_2009_01_05_Traj2_L.mat	E2_12192.xls	4	0.713975	10.4427	3.31859	0.000960945
database_2009_07_16_Traj1_L.mat	E1_14747.xls	2	0.750619	15.7669	1.82826	0.000402061
database_2009_07_16_Traj1_L.mat	E1_13977.xls	3	0.73247	0.77142	0.624549	0.000149982
database_2009_07_16_Traj1_L.mat	E2_14577.xls	3	0.960676	0.249188	2.15165	0.000207212
database_2009_07_16_Traj1_L.mat	E1_15000.xls	5	0.920661	0.155559	1.27869	0.000125838
database_2009_07_16_Traj1_L.mat	E2_12410.xls	5	0.999995	0.868953	1.10244	0.000120519
database_2009_07_16_Traj2_R.mat	E2_11607.xls	1	0.608617	9.95815	3.26201	0.000664146
database_2009_07_16_Traj2_R.mat	E1_13406.xls	2	0.777821	2.15661	1.94159	0.000429742
database_2009_07_16_Traj2_R.mat	E1_13728.xls	2	0.882168	9.5373	0.896539	0.000691289
database_2009_07_16_Traj2_R.mat	E1_14679.xls	2	0.619454	50.7247	0.815482	0.000376762
database_2009_07_16_Traj2_R.mat	E2_14097.xls	2	0.847988	3.03341	1.6168	0.000475474
database_2009_07_16_Traj2_R.mat	E1_14343.xls	3	0.62015	5.57117	2.82168	0.000174952
database_2009_07_16_Traj2_R.mat	E2_10735.xls	3	0.734432	1.86435	2.31435	0.000240106
database_2009_07_16_Traj2_R.mat	E2_10910.xls	3	0.699704	0.697953	1.2759	0.000120622
database_2012_11_14_Traj1_R.mat	E1_13641.xls	1	0.698014	20.2187	2.45841	0.000149534
database_2012_11_14_Traj2_L.mat	E1_15000.xls	1	0.867459	1.84268	1.26846	0.000271449
database_2012_11_14_Traj2_L.mat	E2_15000.xls	1	0.823691	3.21529	5.38537	0.000276081
database_2012_11_14_Traj2_L.mat	E2_14489.xls	2	0.851253	7.27165	1.84207	0.00152309
database_2012_11_14_Traj2_L.mat	E1_14489.xls	3	0.668819	1.53455	1.24363	0.000169219
database_2012_11_14_Traj2_L.mat	E1_14826.xls	3	0.702438	0.898282	1.84137	0.000142927
database_2012_11_14_Traj2_L.mat	E1_09745.xls	5	0.811535	0.430741	0.878483	9.95437e-05
database_2014_04_22_Traj1_R.mat	E2_12195.xls	1	0.641656	4.3714	1.81132	0.000656197
database_2014_04_22_Traj1_R.mat	E1_12927.xls	2	0.829129	2.18653	0.342517	0.000556109
database_2014_04_22_Traj1_R.mat	E2_13179.xls	5	0.675755	3.26252	0.789671	0.000361326
database_2014_04_22_Traj2_L.mat	E2_11633.xls	2	0.61645	26.6381	3.26295	0.00033762
database_2014_04_22_Traj2_L.mat	E2_14401.xls	2	0.758904	4.85225	1.279	0.00148598
database_2014_05_21_Traj1_R.mat	E1_RT1D8.849F0001.xls	1	0.720997	10.6945	1.15039	0.00147912	1.97517e-07
database_2014_05_21_Traj1_R.mat	E1_RT1D9.622F0001.xls	2	0.651528	1.43269	3.09987	0.000426017	4.92995e-07
database_2014_05_21_Traj1_R.mat	E2_RT1D13.591F0001.xls	2	0.69825	1.56896	1.32321	0.00101513	3.22619e-06
database_2014_05_21_Traj2_L.mat	E2_LT1D10.905F0001.xls	1	0.785736	8.81399	0.62115	0.000981333	0.000277261
database_2014_05_21_Traj2_L.mat	E2_LT1D13.350F0001.xls	1	0.723965	1.61613	3.93519	0.000606857	9.42562e-06
database_2014_05_21_Traj2_L.mat	E2_LT1D14.633F0001.xls	1	0.625848	4.74614	1.93218	0.000982761	2.74585e-06
database_2014_05_21_Traj2_L.mat	E2_LT1D14.039F0001.xls	3	0.655877	0.431573	1.29741	0.000248111	0.000379902
database_2015_04_15_Traj2_L.mat	E2_LT1D14.263F0001.xls	1	0.676583	14.3617	3.25016	0.000658575	3.78575e-07
database_2015_04_15_Traj2_L.mat	E2_LT1D14.368F0001.xls	1	0.699699	10.0348	1.87161	0.000879451	6.45882e-07
database_2016_09_25_Traj1_L.mat	E1_LT1D13.830F0002.xls	1	0.641314	3.71448	2.05439	0.000745792	4.46403e-06
database_2016_09_25_Traj1_L.mat	E2_LT1D14.077F0001.xls	1	0.705733	2.30923	1.75649	0.000619555	1.57467e-06
database_2016_09_25_Traj1_L.mat	E1_LT1D14.304F0001.xls	2	0.725141	2.57069	2.0036	0.000897681	1.07474e-05
database_2016_09_25_Traj1_L.mat	E1_LT1D11.782F0001.xls	3	0.999999	1.8669	0.636685	0.000179784	1.56982e-05
database_2016_09_25_Traj1_L.mat	E2_LT1D10.565F0001.xls	3	0.743026	0.403004	0.976389	0.000206008	0.000445301
database_2016_09_25_Traj2_R.mat	E1_RT1D11.490F0001.xls	1	0.723564	3.62146	5.75566	0.000549994	3.72571e-06
database_2016_09_25_Traj2_R.mat	E1_RT1D13.714F0002.xls	1	0.707156	7.1215	3.07581	0.000540523	1.12234e-06
database_2016_09_25_Traj2_R.mat	E1_RT1D14.897F0002.xls	1	0.707201	17.8135	1.30633	0.00101916	5.82349e-08
database_2016_09_25_Traj2_R.mat	E2_RT1D14.595F0001.xls	1	0.66268	2.54641	1.07063	0.000459518	2.50681e-06
database_2016_09_25_Traj2_R.mat	E2_RT1D11.131F0001.xls	2	0.688618	2.26627	4.277	0.00200069	1.218e-05
database_2016_09_25_Traj2_R.mat	E2_RT1D12.666F0001.xls	2	0.813385	1.957	2.02524	0.000208068	3.29913e-06
database_2016_09_25_Traj2_R.mat	E2_RT1D14.048F0001.xls	2	0.857787	1.50473	0.733433	0.00433998	1.19489e-06
database_2016_09_25_Traj2_R.mat	E1_RT1D14.696F0001.xls	4	0.74279	17.3608	2.53703	0.000925453	1.95464e-07
database_2016_11_16_Traj1_R.mat	E1_RT1D12.620F0001.xls	1	0.755198	24.6358	0.874126	0.000226253	1.02134e-07
database_2016_11_16_Traj1_R.mat	E1_RT1D13.417F0001.xls	1	0.750273	19.5119	1.4142	0.00028127	3.32464e-08
database_2016_11_16_Traj1_R.mat	E1_RT1D14.796F0001.xls	2	0.628575	9.64343	0.704755	0.00013751	8.81999e-07
database_2016_11_16_Traj1_R.mat	E1_RT1D14.896F0001.xls	2	0.822753	15.0143	1.09861	0.000318106	2.26488e-06
database_2016_11_16_Traj1_R.mat	E1_RT1D14.896F0001.xls	3	0.696705	13.5613	0.643839	0.000318106	2.07619e-06
database_2016_11_16_Traj2_L.mat	E2_LT1D10.334F0001.xls	2	0.680666	13.2375	1.59024	0.000218494	5.6621e-08
database_2016_11_16_Traj2_L.mat	E2_LT1D12.069F0001.xls	2	0.62028	18.7547	2.24659	0.000618011	1.60176e-07
database_2008_12_18_Traj1_R.mat	E1_11599.xls	1	0.739937	48.8441	1.10853	0.000185658
database_2008_12_18_Traj1_R.mat	E1_14634.xls	1	0.808112	4.41603	3.1641	0.000279343
database_2008_12_18_Traj1_R.mat	E1_13946.xls	3	0.798525	1.48925	1.68776	0.000266734
database_2008_12_18_Traj1_R.mat	E2_14267.xls	4	0.738758	3.26444	2.3136	0.000330731
database_2008_12_18_Traj1_R.mat	E2_15000.xls	4	0.789879	0.246367	1.3598	0.00167222
database_2009_09_30_Traj1_R.mat	E1_10793.xls	1	0.920612	64.9904	0.978181	0.000215009
database_2009_09_30_Traj1_R.mat	E1_12069.xls	1	0.782892	17.8631	0.564883	0.000382872
database_2009_09_30_Traj1_R.mat	E1_13990.xls	1	0.601558	1.0194	1.09583	0.000244951
database_2009_09_30_Traj1_R.mat	E2_10712.xls	1	0.672387	67.2666	1.69925	0.000176738
database_2009_09_30_Traj1_R.mat	E2_11818.xls	2	0.728795	14.15	1.83074	0.000554239
database_2009_09_30_Traj1_R.mat	E2_12069.xls	2	0.812947	3.10662	4.64139	0.000580017
database_2009_09_30_Traj1_R.mat	E2_13654.xls	2	0.800733	3.02198	1.84314	0.000361706
database_2009_09_30_Traj1_R.mat	E2_13990.xls	2	0.610107	8.5482	2.24398	0.000355999
database_2009_09_30_Traj1_R.mat	E1_13654.xls	3	0.942796	1.91343	1.82655	0.000240416
database_2009_09_30_Traj2_L.mat	E2_11824.xls	1	0.859921	26.6196	0.744757	0.00029773
database_2009_09_30_Traj2_L.mat	E2_15000.xls	1	0.821612	21.08	0.550463	0.000773693
database_2009_09_30_Traj2_L.mat	E1_13121.xls	3	0.614635	1.33314	1.16831	0.000157619
database_2009_09_30_Traj2_L.mat	E2_13121.xls	3	0.721447	0.255363	1.56737	0.000129325
database_2009_09_30_Traj2_L.mat	E1_15000.xls	4	0.997762	0.154523	0.75202	0.000433607
database_2009_10_19_Traj1_R.mat	E2_13998.xls	2	0.883483	2.83537	1.60684	0.000984969
database_2009_10_19_Traj1_R.mat	E2_15000.xls	2	0.777478	18.7904	1.35191	0.000877834
database_2009_10_19_Traj2_L.mat	E1_12697.xls	1	0.84629	5.49985	3.97454	0.000977866
database_2009_10_19_Traj2_L.mat	E2_12088.xls	1	0.675018	17.0597	1.32301	0.00125379
database_2009_10_19_Traj2_L.mat	E1_14386.xls	2	0.844612	3.16316	0.761946	0.000224113
database_2009_10_19_Traj2_L.mat	E2_10191.xls	2	0.634715	3.35933	1.0478	0.00043918
database_2009_10_19_Traj2_L.mat	E2_10720.xls	2	0.675792	2.92314	1.19714	0.000333078
database_2009_10_19_Traj2_L.mat	E1_14756.xls	3	0.876224	2.54415	4.77764	0.000392848
database_2009_10_19_Traj2_L.mat	E2_10913.xls	3	1	0.443057	1.95799	0.0001729
database_2009_10_19_Traj2_L.mat	E2_11105.xls	3	0.768083	1.08631	1.03105	0.000317207
database_2009_10_19_Traj2_L.mat	E2_11895.xls	3	0.996621	1.14899	1.98489	0.000173093
database_2014_09_02_Traj1_R.mat	E1_RT1D14.817F0001.xls	1	0.661344	14.2294	1.29086	0.000373924	1.34542e-06
database_2014_09_02_Traj1_R.mat	E2_RT1D13.829F0001.xls	1	0.817396	11.1855	1.016	0.00079535	1.57729e-05
database_2014_09_02_Traj1_R.mat	E1_RT1D14.023F0001.xls	4	0.999455	1.48275	0.396991	8.05632e-05	5.64007e-05
database_2014_09_02_Traj2_L.mat	E1_LT1D12.867F0001.xls	1	0.61869	27.9617	2.88886	0.000108141	6.71444e-08
database_2014_09_02_Traj2_L.mat	E1_LT1D13.164F0001.xls	1	0.643132	3.58507	0.83717	0.000209384	2.31234e-06
database_2014_11_10_Traj1_R.mat	E2_RT1D13.845F0001.xls	1	0.623703	3.93298	1.66529	0.000570036	3.68565e-05
database_2014_11_10_Traj1_R.mat	E2_RT1D13.994F0001.xls	1	0.797382	8.35078	6.02668	0.000705608	4.32774e-07
database_2014_11_10_Traj1_R.mat	E2_RT1D8.460F0001.xls	1	0.799023	23.6671	1.70159	0.000918387	5.42726e-07
database_2014_11_10_Traj1_R.mat	E2_RT1D11.528F0001.xls	2	0.656163	25.6032	10.3182	0.000832701	1.97908e-08
database_2014_11_10_Traj2_L.mat	E1_LT1D14.498F0001.xls	1	0.902493	29.0842	1.35025	0.00691617	3.04395e-05
database_2014_11_10_Traj2_L.mat	E2_LT1D14.349F0001.xls	3	0.806814	3.21974	1.93486	0.000117689	2.54646e-05
database_2014_11_10_Traj2_L.mat	E2_LT1D14.647F0001.xls	3	0.717124	0.984466	1.36591	0.00025632	9.56799e-05
