# Supplementary material for: What is the true discharge rate and pattern of the striatal projection neurons in Parkinson’s disease and Dystonia?
Source: eLife. 2020 Aug 19;9:e57445. doi: 10.7554/eLife.57445 (PMC7462612; doi:10.7554/eLife.57445)
Supplement: Figure 3—source data 6. [file elife-57445-fig3-data6.xls]

## Sheet: Sheet1
DYST_info_Well_IsoUnitsANDStationary
Folder	Filename	Unit id	Iso.Sc	FR	CV ISI	BetaPowerMUA	BetaPowerSTA_LFP
database_2009_01_05_Traj1_R.mat	E2_12151.xls	2	0.629354	13.2604	2.30693	0.000566306
database_2009_01_05_Traj1_R.mat	E2_09864.xls	3	0.619738	1.38138	2.23122	0.000168188
database_2009_01_05_Traj2_L.mat	E2_12192.xls	4	0.713975	10.4427	3.31859	0.000960945
database_2009_07_16_Traj1_L.mat	E1_13977.xls	3	0.73247	0.77142	0.624549	0.000149982
database_2009_07_16_Traj1_L.mat	E2_14577.xls	3	0.960676	0.249188	2.15165	0.000207212
database_2009_07_16_Traj1_L.mat	E1_15000.xls	5	0.920661	0.155559	1.27869	0.000125838
database_2009_07_16_Traj1_L.mat	E2_12410.xls	5	0.999995	0.868953	1.10244	0.000120519
database_2009_07_16_Traj2_R.mat	E1_13406.xls	2	0.777821	2.15661	1.94159	0.000429742
database_2009_07_16_Traj2_R.mat	E2_14097.xls	2	0.847988	3.03341	1.6168	0.000475474
database_2009_07_16_Traj2_R.mat	E1_14343.xls	3	0.62015	5.57117	2.82168	0.000174952
database_2009_07_16_Traj2_R.mat	E2_10910.xls	3	0.699704	0.697953	1.2759	0.000120622
database_2012_11_14_Traj2_L.mat	E1_15000.xls	1	0.867459	1.84268	1.26846	0.000271449
database_2012_11_14_Traj2_L.mat	E1_14489.xls	3	0.668819	1.53455	1.24363	0.000169219
database_2012_11_14_Traj2_L.mat	E1_14826.xls	3	0.702438	0.898282	1.84137	0.000142927
database_2012_11_14_Traj2_L.mat	E1_09745.xls	5	0.811535	0.430741	0.878483	9.95437e-05
database_2014_04_22_Traj1_R.mat	E2_12195.xls	1	0.641656	4.3714	1.81132	0.000656197
database_2014_04_22_Traj1_R.mat	E2_13179.xls	5	0.675755	3.26252	0.789671	0.000361326
database_2014_04_22_Traj2_L.mat	E2_14401.xls	2	0.758904	4.85225	1.279	0.00148598
database_2014_05_21_Traj2_L.mat	E2_LT1D10.905F0001.xls	1	0.785736	8.81399	0.62115	0.000981333	0.000277261
database_2014_05_21_Traj2_L.mat	E2_LT1D13.350F0001.xls	1	0.723965	1.61613	3.93519	0.000606857	9.42562e-06
database_2014_05_21_Traj2_L.mat	E2_LT1D14.039F0001.xls	3	0.655877	0.431573	1.29741	0.000248111	0.000379902
database_2016_09_25_Traj1_L.mat	E1_LT1D13.830F0002.xls	1	0.641314	3.71448	2.05439	0.000745792	4.46403e-06
database_2016_09_25_Traj1_L.mat	E2_LT1D14.077F0001.xls	1	0.705733	2.30923	1.75649	0.000619555	1.57467e-06
database_2016_09_25_Traj1_L.mat	E1_LT1D11.782F0001.xls	3	0.999999	1.8669	0.636685	0.000179784	1.56982e-05
database_2016_09_25_Traj1_L.mat	E2_LT1D10.565F0001.xls	3	0.743026	0.403004	0.976389	0.000206008	0.000445301
database_2016_09_25_Traj2_R.mat	E1_RT1D11.490F0001.xls	1	0.723564	3.62146	5.75566	0.000549994	3.72571e-06
database_2016_09_25_Traj2_R.mat	E1_RT1D13.714F0002.xls	1	0.707156	7.1215	3.07581	0.000540523	1.12234e-06
database_2016_09_25_Traj2_R.mat	E2_RT1D14.595F0001.xls	1	0.66268	2.54641	1.07063	0.000459518	2.50681e-06
database_2016_09_25_Traj2_R.mat	E2_RT1D12.666F0001.xls	2	0.813385	1.957	2.02524	0.000208068	3.29913e-06
database_2016_09_25_Traj2_R.mat	E2_RT1D14.048F0001.xls	2	0.857787	1.50473	0.733433	0.00433998	1.19489e-06
database_2016_11_16_Traj1_R.mat	E1_RT1D14.796F0001.xls	2	0.628575	9.64343	0.704755	0.00013751	8.81999e-07
database_2016_11_16_Traj1_R.mat	E1_RT1D14.896F0001.xls	2	0.822753	15.0143	1.09861	0.000318106	2.26488e-06
database_2016_11_16_Traj1_R.mat	E1_RT1D14.896F0001.xls	3	0.696705	13.5613	0.643839	0.000318106	2.07619e-06
database_2016_11_16_Traj2_L.mat	E2_LT1D10.334F0001.xls	2	0.680666	13.2375	1.59024	0.000218494	5.6621e-08
database_2016_11_16_Traj2_L.mat	E2_LT1D12.069F0001.xls	2	0.62028	18.7547	2.24659	0.000618011	1.60176e-07
database_2008_12_18_Traj1_R.mat	E1_13946.xls	3	0.798525	1.48925	1.68776	0.000266734
database_2008_12_18_Traj1_R.mat	E2_15000.xls	4	0.789879	0.246367	1.3598	0.00167222
database_2009_09_30_Traj1_R.mat	E1_10793.xls	1	0.920612	64.9904	0.978181	0.000215009
database_2009_09_30_Traj1_R.mat	E1_12069.xls	1	0.782892	17.8631	0.564883	0.000382872
database_2009_09_30_Traj1_R.mat	E2_13654.xls	2	0.800733	3.02198	1.84314	0.000361706
database_2009_09_30_Traj1_R.mat	E1_13654.xls	3	0.942796	1.91343	1.82655	0.000240416
database_2009_09_30_Traj2_L.mat	E2_13121.xls	3	0.721447	0.255363	1.56737	0.000129325
database_2009_09_30_Traj2_L.mat	E1_15000.xls	4	0.997762	0.154523	0.75202	0.000433607
database_2009_10_19_Traj1_R.mat	E2_13998.xls	2	0.883483	2.83537	1.60684	0.000984969
database_2009_10_19_Traj1_R.mat	E2_15000.xls	2	0.777478	18.7904	1.35191	0.000877834
database_2009_10_19_Traj2_L.mat	E1_14386.xls	2	0.844612	3.16316	0.761946	0.000224113
database_2009_10_19_Traj2_L.mat	E2_10720.xls	2	0.675792	2.92314	1.19714	0.000333078
database_2009_10_19_Traj2_L.mat	E2_10913.xls	3	1	0.443057	1.95799	0.0001729
database_2009_10_19_Traj2_L.mat	E2_11105.xls	3	0.768083	1.08631	1.03105	0.000317207
database_2009_10_19_Traj2_L.mat	E2_11895.xls	3	0.996621	1.14899	1.98489	0.000173093
database_2014_09_02_Traj1_R.mat	E1_RT1D14.817F0001.xls	1	0.661344	14.2294	1.29086	0.000373924	1.34542e-06
database_2014_09_02_Traj1_R.mat	E2_RT1D13.829F0001.xls	1	0.817396	11.1855	1.016	0.00079535	1.57729e-05
database_2014_09_02_Traj1_R.mat	E1_RT1D14.023F0001.xls	4	0.999455	1.48275	0.396991	8.05632e-05	5.64007e-05
database_2014_11_10_Traj1_R.mat	E2_RT1D13.845F0001.xls	1	0.623703	3.93298	1.66529	0.000570036	3.68565e-05
database_2014_11_10_Traj2_L.mat	E1_LT1D14.498F0001.xls	1	0.902493	29.0842	1.35025	0.00691617	3.04395e-05
database_2014_11_10_Traj2_L.mat	E2_LT1D14.349F0001.xls	3	0.806814	3.21974	1.93486	0.000117689	2.54646e-05
database_2014_11_10_Traj2_L.mat	E2_LT1D14.647F0001.xls	3	0.717124	0.984466	1.36591	0.00025632	9.56799e-05
