# Supplementary material for: What is the true discharge rate and pattern of the striatal projection neurons in Parkinson’s disease and Dystonia?
Source: eLife. 2020 Aug 19;9:e57445. doi: 10.7554/eLife.57445 (PMC7462612; doi:10.7554/eLife.57445)
Supplement: Figure 9—source data 1. [file elife-57445-fig9-data1.xls]

## Sheet: Sheet1
PD_info_AllUnits_FRvsCVISI
24.1854	0.975974
28.6779	0.944341
33.7685	0.910401
25.8096	0.969664
22.86	0.974972
2.15319	3.98159
7.02634	2.33113
57.7316	1.20627
16.9419	0.94118
23.8023	1.09836
23.3854	1.03615
26.7912	0.98358
20.7509	0.963549
23.5427	1.10395
28.0381	1.42485
53.7399	1.02675
20.4981	0.943191
18.9877	3.92897
23.364	0.891563
26.0209	1.74417
18.9866	1.00733
25.6148	1.00103
50.5916	1.03115
7.57322	4.74308
6.92177	3.39953
34.7712	0.975887
32.3001	1.07645
20.826	0.97501
25.6012	1.07326
24.4227	1.03102
21.7436	1.00665
22.7317	1.02036
42.5312	0.717765
32.2347	1.03516
17.7638	1.05961
30.7763	0.974486
26.6535	0.951365
19.084	0.903484
24.5577	0.917538
26.3567	0.944467
23.7045	0.922513
27.0215	0.97608
27.0621	0.909414
27.5944	0.925128
24.2691	0.937334
1.04909	2.56506
25.1673	0.971505
21.2945	0.969919
2.23492	2.33661
33.5898	1.73969
2.26512	0.58707
75.5469	0.886818
19.1608	0.99535
34.4435	0.945005
35.0512	0.967172
29.1224	0.958703
7.37877	1.27957
23.2859	1.01986
5.06548	4.49652
45.2722	0.967912
27.5779	0.975887
22.3537	1.10209
28.387	0.963543
21.5911	1.03373
27.9506	0.9654
27.2579	0.982134
15.0775	1.00806
11.5014	1.25309
64.3143	0.873391
60.4265	0.864792
16.532	1.04075
6.81905	3.59454
6.6488	1.23556
21.2593	0.98933
25.4688	1.0242
28.4768	0.923385
22.6479	1.10513
13.1312	2.70676
16.6547	0.979393
63.9142	0.920368
24.3375	0.982584
50.2248	0.953122
16.1938	0.921735
22.4928	0.960435
58.2232	0.97387
61.9639	0.883656
2.71309	1.33186
4.20001	1.17056
20.0295	1.04129
24.2781	0.984921
27.1137	0.976603
19.1974	0.966145
15.8377	0.969119
51.8006	0.912958
61.2474	0.897602
65.7243	0.897776
29.3703	1.00712
22.9757	0.974862
25.4453	0.959656
26.4914	1.03946
24.867	0.96734
15.7601	0.94184
15.7659	0.981559
21.706	0.911249
17.6713	0.965576
2.39653	0.667397
2.21475	1.99576
24.0333	0.927469
16.3804	1.02629
72.6513	0.870671
65.8076	0.963513
79.0669	0.887315
24.5012	0.997388
10.8594	1.56754
30.1864	1.08771
13.3332	0.957986
58.5617	0.929708
15.9429	1.08
83.1281	0.840452
22.009	0.770381
25.5282	0.973203
22.3245	0.968984
22.5678	0.931172
5.37715	4.25948
18.1488	1.00334
23.8066	1.16208
24.2056	0.979844
25.6679	0.973234
0.546513	1.54615
17.7553	1.0386
18.972	0.975995
26.6948	0.90975
3.71836	2.68538
21.851	1.0263
37.9579	0.992105
20.731	0.961657
22.0365	0.971353
16.1938	0.964748
23.2733	1.08147
29.844	0.993215
30.6501	0.973365
15.4379	1.05877
27.5858	1.03203
25.6212	0.961259
2.50577	2.25898
23.5702	1.01714
25.0741	1.05341
25.2485	1.04514
23.1881	0.952056
13.9225	1.0642
13.9805	1.4401
27.1138	1.04454
25.2653	1.07162
5.35604	1.27604
22.7461	1.03237
30.4461	0.947996
78.6819	0.848861
17.961	0.939026
0.929699	2.42425
8.38284	1.77277
23.8907	1.02626
27.3487	1.037
23.6588	0.891945
25.3367	0.968031
38.718	0.968517
28.9755	0.994969
28.2455	0.926738
27.0112	0.960831
21.9331	0.998964
14.5233	1.07217
21.0991	0.983015
12.2282	1.0725
19.4922	1.0017
21.5513	0.978659
29.3071	0.962595
16.1306	1.01471
15.0913	1.09799
15.5317	1.01735
13.1351	1.12844
15.7445	1.08191
0.468675	1.25013
19.0913	0.958903
26.4713	0.929248
21.7861	0.937813
18.3924	0.921247
18.7192	1.0294
19.877	0.936166
12.2625	1.07129
17.7619	1.00862
25.788	1.00635
16.7904	0.981912
15.5393	0.914815
19.9699	0.94874
21.1822	1.04622
17.6439	1.06911
17.9275	1.03175
12.2983	1.05518
17.5146	1.02873
13.5828	1.03253
20.9041	1.00758
20.5312	1.01085
25.9345	0.912051
23.8623	0.949175
14.6295	1.07794
3.72806	2.83758
25.0568	0.879662
19.2378	2.55061
24.7942	1.93506
42.0023	0.880794
24.1188	0.968688
74.3205	0.924503
27.4474	0.967455
26.7454	0.859669
20.1007	1.09247
30.6092	1.01226
20.8604	2.06641
66.4082	0.941122
37.1951	1.03306
22.8856	1.00925
7.41129	1.53619
24.5702	0.975584
17.7357	1.14017
81.0318	0.837546
64.7296	0.956964
11.6866	1.85445
26.8691	0.935951
21.0679	2.9364
19.0342	1.12812
23.3259	1.00199
1.56339	1.58855
20.5951	1.04182
60.7472	0.855009
33.935	1.14917
26.5486	1.50668
22.0886	0.866231
82.1686	0.820558
23.3914	0.923232
21.8603	0.930858
32.977	0.960289
24.3303	0.910377
30.6098	0.949264
28.5773	1.00798
32.4292	0.90239
21.9177	0.965878
1.37541	1.33869
13.2573	1.01909
6.26224	2.48822
24.9754	0.963281
24.335	0.871513
38.5934	1.04286
29.6645	0.997469
17.762	0.912589
24.1282	1.00075
15.371	1.04923
46.3385	0.908915
67.1659	0.851369
28.3235	1.01502
55.945	0.88742
25.0813	0.937917
39.6746	0.935969
34.0257	0.94282
27.4141	0.893091
19.8645	0.892904
57.893	0.897124
26.5926	0.987839
23.9481	1.11825
32.7918	0.934549
56.039	0.96664
52.2528	0.912114
24.1751	0.966312
44.0187	0.958517
16.557	1.0239
22.157	1.188
32.7379	0.980298
22.313	0.984218
27.9463	0.926009
39.0375	1.00605
28.414	1.03928
21.7332	0.980325
24.3396	0.93347
28.3235	0.91156
18.5241	1.09217
37.115	0.972638
26.7393	0.998633
28.0394	0.973739
7.40199	1.9994
27.4578	1.02232
6.78298	2.01745
36.0294	0.966222
24.9174	1.04751
20.2397	0.95325
26.058	1.04037
16.7498	1.04997
16.9188	0.895563
21.9409	1.00452
57.8453	0.880334
60.2277	0.923505
21.2387	0.967724
32.3434	0.91375
31.5691	0.961054
20.8399	1.00832
40.833	1.06899
3.13157	0.500387
9.21483	1.82331
32.1879	1.00145
35.995	0.984324
21.6336	1.00126
21.9236	0.996694
58.5866	0.893017
19.5256	0.914924
34.4554	1.0553
31.4784	1.01806
32.9249	0.956712
36.6733	0.941871
21.2286	1.33234
31.3745	1.06779
7.61168	8.05568
20.2913	1.11367
76.12	0.870644
29.8171	0.972485
37.0045	0.925019
9.43745	0.69054
46.4499	0.92076
34.1218	0.956581
3.0028	5.13842
26.0013	0.907945
21.8217	0.884857
65.8077	0.947539
22.9803	1.16399
18.0803	0.98436
23.9058	0.977014
36.1879	0.973185
23.4398	0.985741
57.2716	0.9733
27.9304	1.02939
28.3063	0.980268
26.7234	0.998614
26.3185	0.906188
24.2784	0.951303
42.7435	0.941749
24.1188	0.88781
23.6842	0.971818
41.5162	0.947038
22.0111	1.04456
24.663	0.99561
17.1413	1.04776
3.90305	0.906821
5.45137	1.87865
5.07639	2.06209
1.51355	1.51009
53.9649	0.920559
1.41378	2.69372
1.19215	3.75027
1.16113	1.79666
13.3469	0.937129
11.0271	1.06645
15.7809	1.37365
10.109	1.13549
16.9643	1.05857
32.9008	0.911483
31.5558	1.09593
4.76566	3.22512
51.5191	0.880032
1.13752	0.628139
57.0471	0.954612
15.4423	0.967476
29.0513	5.03282
29.1348	0.896621
23.644	0.988664
66.2851	0.877802
24.3462	1.05187
6.01265	3.24311
81.5397	0.895999
18.5259	0.887954
18.7331	0.922591
0.493558	2.16521
1.63885	2.49234
23.3327	0.937907
14.7438	1.09155
2.49285	0.409184
7.7153	2.2858
100.78	0.856048
27.4704	0.937406
20.3972	0.970504
29.681	0.927743
33.8115	0.909641
26.0484	0.995481
7.1022	1.90323
10.552	0.916336
15.7718	0.966198
2.36831	0.501122
15.7172	1.05326
17.5845	0.933647
19.7351	0.948868
28.7679	0.973889
29.7791	0.997064
20.3056	1.04284
31.2799	0.949459
37.4949	0.949744
33.5068	0.934958
19.5069	0.914644
20.4882	0.956
10.0397	1.40351
22.5488	0.969812
28.1565	0.977451
30.1841	1.0499
26.1847	1.00152
28.316	0.960767
41.2151	0.878176
30.6645	0.923922
26.5701	1.02683
26.5889	0.968946
28.4431	0.98213
4.0403	2.05336
25.7921	0.968301
34.4429	0.928395
31.8164	0.980176
1.04367	1.19382
29.179	0.981932
18.6628	0.99954
31.2654	0.852956
27.8667	0.957977
33.0614	0.993319
36.3487	0.948074
22.3601	0.892347
22.414	0.966995
39.4718	0.939124
29.7818	0.918274
23.0237	0.940839
12.4801	0.943226
17.0326	0.898533
27.5435	0.941687
15.9136	0.890363
16.3122	0.979505
22.8491	0.953973
17.1446	1.07285
21.5531	0.947767
30.0455	1.00982
23.2822	0.966393
19.7868	0.960898
24.8359	1.05855
91.1258	0.83558
21.9235	1.10655
2.53503	0.494251
18.5078	0.941616
19.6619	0.94641
15.3304	1.13979
11.4746	1.09031
15.6057	1.00731
63.2075	1.00245
0.351615	1.47337
23.6424	1.0525
20.7227	0.994527
24.012	0.888441
24.7101	0.859214
18.8041	0.885561
28.1007	1.08956
40.01	1.01878
42.6319	0.96862
33.8943	1.00118
38.7358	0.916653
31.7227	1.04345
31.0196	0.966834
27.8514	0.912606
26.0541	0.861086
24.9963	0.902783
24.9513	0.908844
20.8279	1.09906
19.353	0.876393
17.2673	0.757329
22.2068	0.999423
27.3958	0.929404
54.152	0.950298
52.713	0.923309
34.756	0.959064
38.9815	0.865434
33.7185	0.853026
34.9643	0.799678
17.3697	0.861918
17.4293	0.960471
27.8154	0.911924
22.4971	1.03835
15.4631	0.896771
25.804	1.10987
22.0307	0.809709
13.9688	1.0308
26.1271	0.964858
32.2371	0.946258
20.4735	1.01305
31.1975	0.909177
35.8608	0.992707
23.9582	0.963257
24.976	0.974305
21.0965	0.980042
13.5697	0.965023
13.6948	0.929784
17.9087	1.25155
26.354	0.934276
24.6166	0.990684
18.9821	0.946703
54.0157	1.09843
21.3505	1.07191
26.033	0.939106
28.756	0.940377
41.5336	0.925497
23.5593	1.03758
1.56373	0.73631
24.1644	1.09979
31.1334	0.919538
29.3007	0.941762
26.6407	0.919165
34.1835	0.93112
29.8856	0.901984
31.1169	0.978739
84.9849	0.815818
28.5989	0.949745
25.6313	0.970967
25.2272	1.00144
60.9152	0.890872
19.5426	0.881214
25.942	0.919965
23.8432	0.899049
16.1605	1.89017
8.20435	1.90976
89.4536	0.831168
21.4198	0.946706
34.8374	0.942198
33.1323	0.907394
19.387	0.97402
35.0229	0.981928
17.6063	1.00273
26.3297	1.0472
27.7266	0.980676
22.1972	0.938264
20.7476	1.0322
27.2047	1.03552
29.765	0.951437
27.1184	0.943038
32.7328	0.969496
34.7368	0.955286
29.0569	0.863375
30.8187	0.979952
27.723	0.810753
29.9378	0.955722
36.3963	0.927147
28.9827	0.938163
32.3137	0.925728
22.8667	0.88186
27.1182	0.98269
26.7597	0.991562
21.824	0.977081
15.6553	1.04214
22.0915	1.00463
20.7634	1.08123
19.1233	0.962454
21.3985	0.989717
20.1252	0.922139
22.5867	1.00829
19.608	0.997642
56.6713	1.0141
50.7633	0.912693
16.5221	2.98751
42.121	0.940253
39.6401	0.96547
33.9562	0.989871
52.0927	0.885775
36.2839	0.973714
43.3508	0.966008
32.133	0.939409
1.83167	0.494358
34.5175	0.937106
55.1806	0.895274
12.7295	2.34464
35.7985	0.942409
1.95934	1.94386
44.2807	0.943031
64.0869	0.86117
2.77618	1.70718
56.1135	0.911129
51.6175	0.75643
33.0773	0.92859
121.127	0.797154
163.265	0.67523
40.5147	0.854009
39.4793	0.904001
35.5134	0.955807
155.479	0.685995
47.7317	0.948267
2.36425	0.724096
43.8802	0.953342
6.99523	2.12261
47.1666	0.8581
52.8384	0.933411
88.7345	0.881565
38.7357	0.845165
40.5991	0.948906
31.6879	0.950051
120.603	0.78903
45.912	0.876162
110.461	0.7921
29.1164	0.925737
7.3526	1.11509
19.3119	1.00695
30.1637	0.965499
25.868	0.93684
40.2615	0.922181
29.1277	0.991049
162.455	0.654448
33.218	0.926695
54.6604	0.911147
115.929	0.757198
51.7318	0.928542
149.033	0.699303
22.4242	1.17546
22.869	1.0044
147.034	0.719336
58.2417	0.890051
58.9081	0.892357
27.8688	0.872644
34.5068	0.944198
30.0325	0.9558
29.5809	0.865469
11.163	1.48911
53.8231	0.872876
106.263	0.800931
36.2274	0.92266
139.148	0.687888
35.496	0.914006
56.1846	0.860544
0.804554	1.87392
36.4058	0.903395
35.3213	0.871421
26.9416	0.937549
41.6934	0.850361
35.0433	0.941323
25.148	1.05692
3.35478	1.62673
53.4231	0.909287
34.7959	0.907351
33.9831	1.00433
35.8318	1.01791
36.4667	0.997512
51.7288	0.970482
2.49279	2.98328
45.7946	0.905739
51.926	0.943112
57.9303	0.885258
45.4934	1.04815
27.8011	0.969515
36.9716	0.929059
45.1192	0.910882
38.5202	0.917384
54.9596	0.921752
44.5436	0.940324
8.87399	3.77646
53.0719	0.896274
70.9305	0.908704
32.0371	1.03862
42.3584	0.92657
1.03181	2.3052
34.0297	0.971013
32.4539	1.00986
31.435	0.963614
31.214	0.978553
27.8901	1.00447
35.2786	0.94437
21.3449	1.02147
40.7584	0.940144
23.5596	0.964754
28.207	0.954996
32.1191	0.907548
32.7114	0.966108
29.1746	0.885792
35.1165	0.953159
26.622	1.1259
24.7175	0.989336
24.6152	0.981935
46.7627	0.96
0.676427	1.36251
0.108003	0.812057
10.595	2.52236
31.4586	0.973176
48.8036	0.997945
40.8677	0.985734
20.8961	0.950126
33.0472	0.955087
61.1089	0.947446
45.9913	0.837894
53.5767	0.897487
51.2838	0.892883
67.5621	0.893466
29.3543	1.54107
29.945	0.899745
44.497	1.00063
17.9488	2.32184
42.7664	0.896882
34.0493	0.936079
32.5357	0.904282
41.7275	0.881216
25.7657	0.991239
28.9729	0.826586
58.5565	0.946274
41.8325	0.866124
57.142	0.890439
40.1789	0.964283
59.9675	0.893909
89.4962	0.865578
17.8071	0.937194
29.2624	0.954781
123.614	0.783032
42.522	0.823656
23.7052	0.957302
45.7472	0.94181
35.3652	0.935851
22.7494	0.960843
21.7297	0.976634
54.8779	1.01852
23.2403	0.803894
51.4807	0.922548
50.628	0.901562
2.16988	1.21264
3.21062	2.85192
25.257	0.88685
44.0445	0.857111
48.8759	0.928304
1.01874	1.64237
35.0991	0.938054
33.5883	0.94118
36.0652	0.915994
30.3347	1.01051
35.8506	0.954343
36.8879	1.07174
35.5976	0.95303
26.2129	0.923251
36.8312	0.965735
58.9762	1.15926
103.76	0.802055
66.1094	0.845468
53.7384	0.940636
51.7721	0.895411
63.7425	0.927751
59.8098	0.963588
61.6581	0.887298
42.8987	0.884271
45.239	0.856496
74.634	0.856059
115.885	0.74232
57.5687	0.920174
41.0005	0.936376
44.7762	0.926211
90.6301	0.844169
38.3042	0.995849
52.0849	1.05814
40.2034	0.939698
60.4434	0.87181
55.9417	0.943617
93.0402	0.848158
43.4115	0.897485
30.8062	1.00632
57.0324	0.933624
26.9961	0.952547
50.2587	0.818713
41.6643	0.939374
21.2288	0.921667
42.66	0.878061
47.9058	0.923133
34.3532	0.971368
50.2117	0.905382
48.1085	0.926343
53.8958	0.97785
45.2597	0.911227
32.5737	0.865678
43.8885	0.942283
37.2343	0.815029
34.4951	0.958309
35.7591	1.03332
51.897	0.796815
54.8969	0.82679
37.8527	0.882858
53.9692	0.946143
38.9763	0.881387
39.7384	0.910713
34.6332	0.955922
34.3656	0.894729
43.4894	0.900811
40.9893	0.935441
46.9402	0.938643
45.4686	0.848777
49.6353	0.846552
60.6337	0.818933
64.0601	0.857599
58.8699	0.877846
45.775	0.880023
63.1243	0.882388
59.9097	0.76519
50.3081	0.90248
86.0355	0.710912
41.0077	0.860046
39.7908	0.946486
38.1219	0.871545
25.4094	0.991678
39.1145	0.847926
74.611	0.795079
22.3872	0.97428
73.2298	0.805934
93.762	0.748682
32.6354	0.862555
32.4548	0.831411
26.002	0.907703
37.7613	0.899102
32.7619	0.813585
30.0858	0.984489
35.4446	0.97831
32.8688	0.923122
39.326	0.966693
30.806	0.897131
42.8112	0.803829
23.123	0.879739
27.5573	0.77062
57.6688	0.748298
81.7	0.682409
29.0981	0.828263
32.9962	0.9163
24.1546	0.766311
45.1078	0.978275
39.6205	0.89005
15.2139	0.995426
55.3895	0.841404
20.9461	1.07073
48.683	0.785481
16.0748	0.875697
39.2258	0.761137
27.2582	0.854143
30.0126	0.834343
26.0982	0.818417
38.6159	0.770303
70.635	0.781734
52.3772	0.869754
46.4629	0.858488
49.564	0.853248
21.0348	0.931671
16.6583	1.09055
33.5655	0.682233
43.647	0.910212
30.6069	0.896327
37.7391	0.84179
37.2016	0.765718
24.9446	0.905186
52.4472	0.742708
57.1237	0.778177
51.3622	0.781189
20.4954	0.796054
21.1486	1.05357
34.1929	1.1026
37.427	0.936632
36.3131	1.08082
43.1945	0.907025
41.7064	0.908851
20.1367	1.50104
41.3236	0.924061
58.1027	0.846028
9.9461	1.23682
13.9858	1.78344
23.4066	3.30812
39.4357	0.902102
4.29187	1.63501
65.8751	1.1931
56.9233	2.00181
41.0817	1.1904
27.5358	1.01403
44.8859	0.893467
17.2294	1.05164
64.0656	0.880598
34.9891	0.92165
1.5892	1.91669
37.5733	0.930799
23.6937	0.834705
49.2468	0.880226
39.6182	0.872111
19.8966	1.6233
72.6296	0.839542
71.0533	0.858761
76.2981	0.82242
9.11854	4.32193
67.4994	0.791691
34.02	1.7837
75.0757	0.884354
63.9626	0.906913
37.2544	0.915279
32.7635	0.952587
134.134	0.726855
47.6424	0.952922
29.2205	0.966267
38.3394	1.03221
44.7477	0.937393
30.0674	0.831993
2.18993	2.57447
3.86999	0.881154
25.9053	1.07397
20.1855	1.17895
6.47902	0.860438
24.5726	0.977462
62.8547	0.883253
23.4176	0.965342
74.8512	0.908065
20.3683	0.978638
29.9647	1.08069
25.8437	0.939616
0.283428	1.48148
8.10537	1.43252
15.8736	1.14112
16.3817	1.13621
27.2696	1.38746
32.2656	0.886895
42.4557	0.946441
41.6797	0.855123
33.4868	0.849986
22.569	1.13127
30.5455	0.934893
42.6628	0.878204
36.9812	0.975108
2.3263	1.4216
90.9793	0.84491
22.4462	5.46826
2.92751	1.95914
41.0623	0.948593
7.11236	1.084
41.8139	0.961786
40.3295	0.893438
45.2698	0.961163
37.7619	0.999204
9.59981	3.9029
59.6561	0.929465
44.9191	0.940608
41.8504	0.869332
49.0696	0.948225
42.9995	0.974786
47.098	0.869517
54.0423	0.899963
48.2481	0.875023
62.84	1.09802
33.7011	0.982488
31.4116	0.948277
13.9408	1.74556
67.39	1.06691
46.1433	0.988187
67.9642	1.10382
24.9019	1.34129
34.1653	0.848669
78.8626	1.13942
61.5526	0.940125
47.0211	0.872029
54.74	0.927524
21.0354	1.11713
75.6063	0.825981
28.8879	1.55257
60.5147	1.04914
38.6183	1.02491
38.323	0.964748
30.3756	1.10922
35.8075	1.1158
39.2961	0.906909
120.822	0.767658
41.2762	0.916723
41.6269	0.958108
25.2704	1.07604
25.8431	0.968621
1.23276	2.18675
109.712	0.770761
36.6308	0.921727
48.2969	0.911282
154.228	0.680374
5.38094	4.55201
140.003	0.764899
134.867	0.688589
30.5252	0.978572
135.047	0.715916
9.48239	1.2798
31.7223	0.886624
25.5097	1.00794
41.5621	0.883581
102.918	0.761365
60.428	0.912568
37.7617	0.951673
33.4803	0.841281
33.8581	0.850249
47.9137	1.00028
46.9294	0.926247
24.2531	3.62893
47.0419	0.931969
44.1578	2.23406
58.6683	1.0883
18.9612	0.949981
86.4989	0.982432
49.2122	1.29471
68.0689	1.12115
54.9069	1.3132
93.2551	0.938284
6.14774	3.62941
72.386	2.2029
29.9861	1.71823
63.8389	0.925164
50.0379	1.28081
5.8211	1.84877
35.683	1.00924
66.3009	1.0821
29.6581	1.11685
46.9815	0.904465
46.4821	0.915758
38.9493	1.06504
30.9023	0.827112
30.8213	0.860349
21.0687	0.925843
20.4933	0.95372
44.8522	0.911918
31.6669	0.977539
59.5517	0.873301
40.0855	0.949691
3.53392	1.82957
51.6295	0.920273
1.43723	2.99465
0.271576	1.04787
36.1016	0.952584
40.3739	0.951306
46.1289	0.9422
30.7616	0.940402
7.39354	2.00556
30.1106	0.899064
35.6959	0.836638
44.1627	0.974791
41.0338	0.905859
36.5568	0.932108
31.7098	1.05029
41.4495	0.936869
0.114224	1.0579
41.8248	0.875328
22.6542	1.83313
36.1834	1.05103
0.320026	1.45159
32.3395	1.27299
41.57	0.879748
40.7955	0.898195
20.822	1.07035
31.8834	0.937375
37.3566	0.980584
30.1455	1.00207
32.3974	0.938051
26.4737	0.934115
28.1484	0.948706
56.5172	0.904096
48.761	0.915087
29.8191	0.933148
34.9592	0.966402
25.8215	0.938361
36.1498	1.00939
33.7617	0.977794
37.8208	0.940239
53.3106	0.849208
24.864	0.909504
25.2709	0.845863
22.3597	0.956234
20.8715	0.954449
17.1336	1.00757
47.9726	0.936535
23.4829	1.35359
38.3232	1.01338
23.5166	0.894412
27.714	0.815743
26.7314	0.934408
39.4329	0.907673
22.4023	1.02224
38.6077	0.911166
28.4267	4.02518
42.8994	0.949384
58.8035	0.870765
40.7013	0.869843
29.8793	0.852185
57.6288	0.883292
23.1913	1.18005
2.18973	0.57124
46.9744	0.861625
49.4567	0.951175
14.5758	1.58212
6.03485	1.93721
32.9215	0.985855
44.2946	0.937401
109.784	0.71123
103.483	0.706362
32.4031	1.02219
30.0326	0.934971
38.6534	1.0493
61.3089	0.918535
34.9127	0.980876
46.3362	0.937167
35.5037	0.961562
31.549	0.937308
40.5174	0.867982
45.8942	0.909085
40.4939	0.903886
56.397	0.905917
39.7231	0.915339
23.7384	2.29916
65.8558	0.851764
35.9263	1.00929
27.9217	1.6352
40.1347	0.849309
43.384	0.92751
44.4884	0.863092
35.5836	1.10808
71.2736	1.00694
51.746	1.40091
58.7726	0.93263
68.2947	0.887956
61.3734	1.0598
78.1289	0.832669
45.0287	1.0517
75.2896	0.96218
77.9372	0.810873
30.6189	1.85674
48.6574	0.875649
56.8016	0.868647
58.4747	0.803563
114.635	0.803963
51.2287	0.893823
97.269	0.856958
64.7985	0.867779
101.754	0.783033
52.2186	0.881291
103.278	0.774006
107.593	0.738892
41.3108	0.964475
65.9713	0.893116
112.962	0.750682
118.477	0.737172
125.605	0.753291
58.1836	0.898858
8.38443	4.69843
25.3468	1.02188
41.6242	0.906266
31.2576	0.916698
38.4107	0.944495
28.2813	0.884052
40.5442	0.962668
53.4042	0.866381
31.8282	0.933808
22.0912	0.939224
40.5732	0.866736
27.5792	1.09077
35.1923	0.943356
31.3953	0.999906
97.6074	0.848403
51.7134	1.00698
32.231	0.9206
75.103	1.12351
74.5948	0.862593
34.3284	0.948879
23.3272	0.931748
19.9444	1.14837
57.0367	1.07021
75.0857	0.988781
9.01935	2.27379
51.1975	0.999437
27.9842	1.79072
63.0402	0.943448
60.7196	0.983668
28.4932	0.932063
20.6499	3.18297
46.8047	0.911028
33.5241	0.846175
37.7946	0.905298
47.5432	0.910649
2.46933	1.52288
0.718746	0.630052
56.3729	0.892025
44.6423	0.927867
3.40779	1.86473
5.16144	1.89033
0.649918	0.644859
22.5903	0.956521
2.37223	0.873848
52.7962	0.97447
31.4995	0.89127
19.6038	0.834854
55.4262	0.965103
36.2953	0.979278
36.1399	0.886661
50.2546	0.978531
39.2441	0.952871
41.0691	0.910778
34.4906	0.95313
20.5293	1.40328
46.225	0.896012
27.1596	0.961487
2.98726	3.04983
42.2441	1.22562
24.497	1.62617
38.2702	1.0604
34.0605	1.37783
34.1284	0.821194
43.3252	0.965398
54.5526	0.939612
40.3607	0.93905
43.1431	1.01647
50.8547	0.965689
35.567	0.992461
32.8673	0.916452
14.8187	2.444
24.6991	0.961018
37.0582	0.940346
34.1952	0.908888
30.1336	1.10354
26.9126	0.992665
39.2476	0.937721
30.0687	1.06032
27.7146	1.4001
33.8549	0.953517
23.3272	0.977828
21.0866	1.12285
46.4227	0.887549
6.05922	3.19957
41.5838	1.01065
10.2647	2.2813
11.5976	1.67855
24.7059	0.810522
43.5649	0.999983
67.9566	0.874004
44.149	0.842849
52.6751	0.940285
43.1018	0.863745
8.05935	9.95481
108.168	0.791427
52.6379	0.890269
48.9245	0.91126
66.8944	0.908571
33.7539	0.907281
23.1695	1.21597
44.8942	0.928834
43.6884	0.909807
48.8585	0.836343
3.23725	0.00443656
40.7767	0.867178
63.3419	0.856527
2.81025	0.756451
34.1476	0.953881
64.6701	0.855864
65.6395	0.910357
37.3167	0.910096
43.9529	0.936247
28.2404	0.573494
31.6671	0.966227
16.5746	3.87832
46.5618	0.979922
35.7331	0.887029
43.2264	0.933148
2.97461	0.604266
13.5245	2.26856
41.3829	0.94907
10.1908	2.30628
36.8717	0.925362
38.1844	0.910187
38.8558	0.882984
46.4141	0.914326
57.281	0.83389
33.1606	0.922524
41.8256	1.09067
160.091	0.644639
48.4683	0.903601
55.3644	0.914648
45.0969	0.929293
39.9733	0.900426
44.7501	0.944063
38.054	0.917288
55.7674	0.89558
41.6577	0.90297
41.6475	0.854669
42.4356	0.917564
42.4216	0.936781
31.6639	0.947901
31.8508	0.84849
2.69673	1.95093
75.9255	0.771111
39.9909	0.937888
39.7584	0.878465
34.6885	0.897735
28.8516	0.866197
62.8793	0.901389
28.3429	1.05788
48.8549	0.917266
26.0993	0.950591
109.418	0.77856
145.135	0.717339
137.306	0.749856
48.6633	0.975839
43.8068	0.906643
94.7473	0.798622
37.5911	0.866693
38.38	0.91036
129.21	0.725171
29.5905	0.923204
24.0928	0.878324
26.9917	1.01879
32.3489	0.918267
44.9178	0.916795
89.6004	0.839374
72.2967	0.744798
119.705	0.911565
29.7088	0.942774
28.2712	0.939737
3.233	0.557103
130.811	0.730516
106.666	0.808784
16.3155	0.880299
136.314	0.735691
25.9388	0.915616
26.233	0.961576
24.882	0.932508
30.6635	1.00932
53.4939	0.957037
34.2212	0.872804
37.3079	0.874926
53.6867	0.912211
45.0358	0.928996
37.604	0.932108
48.9335	0.817509
33.8601	0.963436
57.986	0.884065
45.1513	0.843567
29.5186	0.924684
40.2872	0.936022
47.0689	0.882536
37.6731	0.886389
33.1377	0.952933
41.5364	0.91398
58.9893	0.917788
47.9332	0.997063
45.6119	0.884655
6.06035	4.65216
32.1016	0.966708
49.0181	0.873571
47.9932	0.876779
33.2695	0.896108
28.034	0.79078
53.6729	0.856208
2.97728	0.926923
48.3124	1.0305
51.7191	0.905805
43.5554	0.859705
44.3817	0.952852
12.8558	1.60231
27.5355	0.87937
56.8768	0.801468
29.9297	0.890148
9.57522	1.37715
4.46095	1.32255
31.0846	0.944915
30.831	0.884997
44.381	0.900646
28.4234	0.979538
42.0909	1.0179
35.2319	0.925121
46.1357	0.976952
32.0151	0.893124
41.9612	0.897995
39.9066	0.88694
56.9776	0.818985
39.4346	0.899938
35.8753	0.968314
28.1455	0.991853
33.0078	0.931704
31.4328	0.935256
42.3605	0.92867
33.9526	1.0135
31.2459	0.955791
41.2889	0.950824
34.1443	1.00805
33.9799	1.01572
30.264	0.921535
34.2362	0.869759
20.3549	0.924498
28.5363	1.03466
27.6562	1.01975
42.3542	0.905938
41.071	1.05266
25.8238	1.01085
25.2957	0.973152
28.0973	1.01672
18.8932	0.963166
30.7473	1.00577
39.1736	0.917192
25.4538	0.989194
31.2493	0.960123
44.41	0.944692
28.4916	0.933685
32.9596	0.95563
27.8381	0.995553
32.2732	0.93718
34.0803	1.04436
38.1354	0.954
6.86347	0.928326
39.2515	0.916327
34.3542	0.988506
41.445	0.985032
37.9181	0.912255
6.48785	1.25818
38.5522	0.840554
30.0987	0.868976
22.3012	0.891282
24.7553	0.896131
24.4106	0.955363
26.0304	0.81892
26.4797	0.981887
26.4965	1.93967
39.2788	0.872344
43.5324	0.854
57.1998	0.82356
25.2687	0.838634
46.0297	0.8365
4.47752	0.849331
40.007	0.847287
49.7834	0.836003
105.423	0.78603
40.335	0.882698
74.4204	0.829491
48.709	0.826641
38.9878	0.858024
78.5368	0.806481
83.6759	0.857646
47.098	1.01338
51.3693	0.759457
38.6957	0.957409
26.379	1.03974
27.6262	0.93362
27.8593	0.858435
22.0143	1.05376
26.011	0.96601
81.1034	0.837167
46.8123	0.86745
42.4963	0.871919
72.1098	0.790591
36.1049	0.925388
34.4324	0.88619
64.6246	0.777089
43.5415	0.736788
34.242	0.924683
25.2441	0.918931
21.8164	0.837363
31.128	0.952659
23.2971	0.91252
20.2458	0.948884
17.7341	0.838185
72.3015	0.831388
61.6895	0.970823
49.1574	1.0686
44.8389	0.881936
38.254	0.926966
33.98	0.997682
2.903	1.6595
34.7366	0.720743
50.7596	0.925518
45.7921	0.802341
66.3683	0.866303
43.5429	0.908533
38.4943	0.879536
4.65233	0.896383
11.7468	1.08703
60.4715	0.916956
62.0309	1.03086
5.6973	1.7041
25.411	0.869915
28.6041	0.836864
41.4256	0.903234
17.015	1.00595
17.8223	1.00141
36.7297	0.781191
47.1367	0.894028
48.2191	0.861685
41.5143	0.765427
62.9045	0.870216
53.6273	0.751745
29.2134	0.897276
21.3604	0.931376
30.5429	0.868843
24.02	0.904253
35.5024	0.923308
16.8908	0.921046
9.23145	1.04051
37.6629	0.734851
37.3253	0.871786
28.7782	0.940948
42.4148	0.845606
45.5169	0.875839
51.9798	0.951315
47.6902	1.02753
51.4151	0.81964
55.0271	0.94163
41.0282	0.893245
3.38813	1.12504
4.64512	0.695681
18.1691	0.920918
2.28037	0.727594
7.9478	1.27837
39.1303	1.04364
44.6944	0.866201
38.9553	1.1097
37.6071	0.871032
41.0815	0.768118
27.8765	0.989685
13.2355	1.02507
33.1042	0.874616
21.2871	0.849257
30.3666	0.821258
32.1014	0.96931
5.0822	0.778363
25.6704	0.914875
24.4677	0.894591
21.1372	0.950352
16.3773	0.778597
9.21136	0.979862
13.3616	0.917722
31.8242	0.980248
22.7489	0.998906
16.2311	0.815857
30.6095	0.90232
23.6026	0.880475
28.9766	1.29904
47.4731	0.93693
49.554	0.848073
47.7716	0.949073
23.959	0.863551
45.6185	0.915255
41.446	0.866681
57.1899	0.863956
55.6009	0.835492
46.848	0.806961
40.4266	0.873961
38.7392	0.818485
2.68661	0.46691
19.6757	0.930691
44.1914	0.950341
35.1296	0.910455
31.5721	0.986755
49.0637	0.898069
34.4166	1.17946
39.0342	0.821306
30.1553	0.793566
41.9522	0.927554
35.221	0.884361
37.1655	0.854355
13.5768	0.956688
34.8777	0.926821
19.7935	1.13198
29.9972	0.838456
41.2155	0.862823
21.1347	0.92145
48.5532	0.842725
33.6425	0.978271
43.8389	0.772195
29.2779	0.926763
56.6205	0.865136
92.9235	0.836786
55.8354	0.869447
56.419	0.827709
40.8591	0.809888
34.0218	0.781165
45.9942	0.820131
25.5533	0.98482
41.6431	0.729248
33.6324	0.881814
44.8958	0.955165
24.0169	0.916702
37.1055	0.839214
32.9101	1.34438
23.9057	0.876915
29.2872	0.790602
40.4011	0.843032
26.6866	0.856668
39.5543	0.868776
54.5232	0.952439
46.198	0.710026
72.678	0.961464
31.1844	0.897579
34.86	1.02861
7.03108	0.960228
38.874	0.77624
4.56739	1.09936
18.4772	1.06097
41.9681	0.844539
39.4982	0.798291
47.5421	0.905478
42.8233	0.893973
35.0602	0.891346
46.7603	0.844691
40.1571	0.835842
5.30033	3.44812
30.2784	0.962799
55.6773	0.900879
17.9572	0.882589
50.0611	0.878864
75.5242	0.938234
51.8552	1.06495
38.8132	0.806458
5.25487	2.66079
15.5734	1.0876
33.3554	1.11085
16.3416	0.990901
51.3985	0.885899
47.1122	0.936679
42.1159	0.923817
47.9762	0.981182
25.6944	0.990868
71.8056	0.800943
24.1027	1.00833
6.95146	0.849002
21.712	0.945563
9.30031	1.62027
9.55414	1.8624
96.3188	0.855109
80.4928	0.772715
63.4977	0.953517
47.8463	0.946508
31.8203	0.954907
35.9429	1.01792
87.037	0.858717
37.8045	0.892724
18.9512	0.867076
37.3136	0.980015
34.3463	0.801165
25.884	0.859287
44.2267	0.919357
29.317	0.822084
43.1041	0.823863
30.1327	0.835922
53.6919	0.845334
2.92587	1.0805
58.3729	0.861999
35.6024	0.982
35.2197	0.784225
38.8993	0.923933
36.6738	0.870204
4.11588	0.686029
29.8955	0.92967
29.2179	1.05662
11.6446	0.819047
35.7239	0.84625
48.2681	0.862662
60.3803	0.844986
67.6806	0.89136
26.5285	0.906462
31.3383	0.926597
34.381	0.924098
41.1953	0.870885
72.425	0.760575
14.8048	2.06337
27.1682	1.04889
36.5314	0.960291
74.4325	0.760091
40.5854	0.870248
101.234	0.764019
31.6057	0.997426
2.94513	2.01087
35.8634	0.83524
47.2971	0.854923
38.6146	0.858115
34.5732	0.871132
7.17487	0.989956
6.89086	1.7045
93.7196	0.77676
12.2555	0.948916
48.8096	0.901151
18.8123	0.949104
54.7009	0.848943
35.8287	0.96193
2.3959	1.00986
30.6576	0.948598
34.1041	0.911217
24.9038	0.972948
7.62433	1.0236
34.7573	0.967616
34.1537	0.955682
35.2433	0.912508
45.7234	0.921144
10.6325	0.919494
38.3787	0.841537
33.2533	0.882011
33.9021	0.966455
26.637	0.886458
28.7778	0.979335
26.741	0.837217
26.359	0.995469
30.9991	0.920293
31.415	0.970702
47.7893	1.10085
37.9918	0.876352
29.4696	0.903845
44.7183	0.859367
35.5903	0.886144
25.8188	1.03025
2.13789	1.59685
1.21298	1.14235
33.3555	0.955054
27.0152	0.976214
35.5005	0.805607
27.8784	0.937996
45.9097	0.895475
33.5468	0.933826
33.6662	0.812193
32.2728	0.93622
29.1745	1.02095
35.587	0.834896
40.4675	0.831096
31.5651	0.909265
35.5471	0.867613
34.6373	0.934966
38.4937	0.9305
1.92244	0.644202
27.3633	0.806664
26.8341	0.969136
15.2487	0.909935
24.7419	0.996682
19.7099	0.880125
22.804	0.938817
25.2846	0.966308
24.0305	0.878511
32.3447	0.965998
23.6108	0.878708
30.3244	0.829952
10.3331	0.838004
44.8212	0.82528
64.5095	0.8017
33.1213	0.87806
99.0743	0.808696
30.5411	0.970234
73.448	0.858275
44.2169	0.852071
9.5542	0.786024
34.1507	0.847467
26.2219	0.967402
49.3144	0.980862
47.9397	0.894898
54.7936	0.893891
34.726	0.903402
38.2199	0.91699
20.0875	0.989912
20.6278	1.34105
28.0264	4.59214
39.3906	0.950479
40.0665	1.57981
30.5411	0.970234
33.7043	2.4115
49.4829	0.848667
67.3603	0.877894
48.4297	1.00631
6.3168	1.36809
71.0863	0.852692
11.6985	0.835687
54.7936	0.893891
54.3537	0.872849
37.5717	0.908228
39.0764	1.03264
34.3576	0.958694
43.3176	0.889309
52.1167	1.03652
43.8495	0.835719
28.4113	0.974726
56.3558	0.954626
20.4008	0.977988
21.7453	0.987863
13.9551	1.85236
47.4425	0.930621
112.935	0.833005
17.2683	1.01528
29.0115	1.02566
0.0736036	1.0579
39.7549	0.892954
37.5797	0.942419
1.92922	0.70994
25.3538	0.937532
137.183	0.742961
125.206	0.793767
106.357	1.72993
46.2411	0.905028
121.879	0.801461
21.7453	0.987863
121.873	0.791473
16.1357	1.04323
19.5957	0.887182
4.43778	0.78535
101.255	0.749336
0.735883	1.45009
119.558	0.744182
37.5797	0.942419
41.607	0.934419
24.8377	0.972951
38.3344	1.02018
24.5068	0.822859
44.7696	0.882113
55.5584	0.910155
40.9262	0.959587
45.8009	1.0397
37.4107	0.960012
33.8414	0.909008
20.035	0.839303
39.6619	0.905583
25.8044	0.914436
38.3954	1.0123
25.1061	0.775653
53.4362	0.912884
1.63697	0.614253
63.2794	0.863802
38.1021	0.926255
1.89207	0.486274
47.2198	0.903897
20.035	0.839303
51.6344	0.933027
49.7242	0.974299
45.0531	0.930594
66.3767	0.862257
63.2794	0.863802
46.8981	0.855147
6.05182	1.21604
31.9041	0.995679
40.6044	0.922151
48.1575	0.89393
48.4292	0.925744
30.451	0.993671
34.0445	0.915031
20.6408	0.783143
20.035	0.985697
21.706	0.853263
27.7097	1.01422
41.6257	0.942113
47.5071	0.901222
23.4617	0.942314
33.7633	0.992297
20.035	0.985697
40.0704	0.935134
0.868261	2.09807
34.924	0.922223
31.4095	0.876764
36.0394	0.810028
31.1818	0.936134
23.2113	0.81075
13.7973	0.944126
42.887	0.855954
23.2113	0.81075
5.04318	1.02387
54.5599	0.890898
47.6193	0.960751
54.4053	0.936522
40.7884	0.883012
8.4936	1.9753
55.7346	0.943371
21.3054	2.07211
49.6502	0.902183
22.2758	1.36216
54.064	0.868758
17.0794	2.9784
15.6181	2.3025
34.4845	0.844802
32.4596	0.742314
9.4901	1.21121
74.259	0.773523
65.9227	0.839724
36.7796	1.02703
85.1469	0.799897
10.5646	2.17786
44.5173	0.898643
43.9268	0.928632
48.154	0.898686
120.344	0.830937
53.5354	0.845318
66.8338	0.878579
36.9806	0.88706
32.4885	0.964345
38.5324	0.897432
22.0217	1.59812
46.3196	0.981041
58.6792	0.942464
65.8331	0.864876
57.9579	0.919156
44.0325	0.78975
6.2014	1.78248
58.9799	0.851945
38.1681	0.918453
4.15596	1.35198
22.9011	1.01818
123.134	0.762501
64.2714	0.868516
101.61	0.8774
37.7821	0.889308
128.759	0.778533
66.4487	0.806407
105.844	0.799505
56.7861	0.916748
98.3617	0.82388
91.723	0.810272
151.355	0.65813
23.3733	1.03486
54.3742	0.972491
42.9491	0.873125
100.717	0.792256
102.672	0.775948
14.9607	0.972743
36.8819	0.92466
55.7859	0.892805
43.6665	0.920682
51.4653	0.95651
36.5883	0.99947
33.8909	0.868668
44.1926	0.972367
117.204	0.80613
53.9599	0.930774
35.8328	0.977182
48.5884	0.913295
3.51821	1.53981
8.11772	0.784701
171.937	0.629824
1.38126	0.518197
40.3491	0.904191
46.3452	0.895099
9.48568	2.42481
36.306	0.920793
2.72205	0.932556
11.6702	1.37591
47.6124	0.901831
49.6683	0.994756
62.3137	0.75526
42.4745	0.914391
39.8953	0.946601
39.3684	0.962049
46.3368	0.885255
53.5354	0.883292
58.6752	0.996489
35.1169	0.970413
24.0742	1.015
5.98668	1.38461
41.5444	1.06886
53.3884	0.883505
59.8069	0.87746
65.0869	0.895025
7.37974	1.00151
59.3943	0.878993
36.9942	0.932264
2.45311	4.60813
27.656	1.01347
35.9633	0.992898
2.76728	5.81132
26.2725	1.11094
27.2125	1.0196
40.9028	0.854317
53.8801	0.897226
33.4279	1.02561
0.606407	1.31391
43.4684	0.948113
46.4924	0.911512
12.7379	0.952693
2.74748	1.04875
47.9081	0.942608
13.6753	0.900534
31.0219	0.95752
50.6742	0.898787
35.177	1.10785
45.5209	0.928999
35.7949	1.54066
40.8729	0.926139
66.8895	1.06659
42.3982	0.848454
56.5968	0.891014
30.7148	0.973774
46.0945	0.874772
86.0842	0.87438
15.9187	2.83888
20.043	1.24351
48.715	0.898989
67.5253	0.833812
38.1866	0.93787
50.5043	0.939576
40.4502	0.966912
64.3372	0.777369
49.8339	0.878312
48.4249	1.10524
54.7568	1.0319
116.626	0.695913
47.7944	0.974595
74.3191	0.815928
81.4468	0.809664
66.439	0.870942
39.966	0.86542
35.7646	1.20122
35.2382	0.962953
51.2593	0.927957
48.4682	0.958886
14.8519	2.45315
33.2209	0.878236
19.9608	2.07655
78.7884	0.835568
42.2845	0.865133
60.927	0.927108
33.1755	1.29939
[truncated: 918 more rows]
