# Supplementary material for: What is the true discharge rate and pattern of the striatal projection neurons in Parkinson’s disease and Dystonia?
Source: eLife. 2020 Aug 19;9:e57445. doi: 10.7554/eLife.57445 (PMC7462612; doi:10.7554/eLife.57445)
Supplement: Figure 9—source data 2. [file elife-57445-fig9-data2.xls]

## Sheet: Sheet1
PD_info_Well_IsoUnits_FRvsCVISI
2.15319	3.98159
7.02634	2.33113
42.5312	0.717765
17.7638	1.05961
1.04909	2.56506
5.06548	4.49652
6.81905	3.59454
13.1312	2.70676
2.71309	1.33186
2.39653	0.667397
5.37715	4.25948
0.546513	1.54615
3.71836	2.68538
5.35604	1.27604
7.41129	1.53619
11.6866	1.85445
1.56339	1.58855
33.935	1.14917
26.5486	1.50668
1.37541	1.33869
13.2573	1.01909
7.40199	1.9994
9.43745	0.69054
3.0028	5.13842
1.19215	3.75027
1.16113	1.79666
6.01265	3.24311
1.63885	2.49234
2.49285	0.409184
2.36831	0.501122
4.0403	2.05336
2.53503	0.494251
11.163	1.48911
0.804554	1.87392
2.49279	2.98328
1.03181	2.3052
0.676427	1.36251
3.21062	2.85192
1.01874	1.64237
58.9762	1.15926
4.29187	1.63501
41.0817	1.1904
9.11854	4.32193
3.86999	0.881154
0.283428	1.48148
2.3263	1.4216
2.92751	1.95914
9.59981	3.9029
5.38094	4.55201
5.8211	1.84877
1.43723	2.99465
0.320026	1.45159
28.4267	4.02518
14.5758	1.58212
27.9217	1.6352
8.38443	4.69843
9.01935	2.27379
2.46933	1.52288
0.649918	0.644859
2.98726	3.04983
8.05935	9.95481
28.2404	0.573494
26.4965	1.93967
4.65233	0.896383
2.68661	0.46691
23.9057	0.876915
29.2872	0.790602
7.03108	0.960228
4.56739	1.09936
4.11588	0.686029
2.94513	2.01087
6.89086	1.7045
1.21298	1.14235
6.3168	1.36809
11.6985	0.835687
1.89207	0.486274
22.2758	1.36216
17.0794	2.9784
9.4901	1.21121
6.2014	1.78248
2.76728	5.81132
49.8339	0.878312
14.2778	1.22331
1.42784	1.45923
2.73815	0.61858
3.75732	2.98445
16.153	2.75771
2.41077	0.449069
12.4258	1.4017
24.8264	1.80051
25.195	3.06049
34.3101	0.573281
50.6262	0.876002
46.323	0.8358
63.5533	1.08092
3.67124	0.832105
46.241	0.796768
3.86007	1.4007
4.83615	0.935734
8.32114	1.15479
1.53902	1.30209
34.4282	1.22836
53.2805	0.828575
11.9514	1.25
9.5424	1.63313
26.5419	1.3003
6.20724	5.16214
11.4324	0.783203
13.5027	1.39075
9.74655	0.809663
22.2261	1.96904
28.5254	1.42198
1.07784	2.01815
3.84489	1.38205
1.31311	2.41098
