# Supplementary material for: What is the true discharge rate and pattern of the striatal projection neurons in Parkinson’s disease and Dystonia?
Source: eLife. 2020 Aug 19;9:e57445. doi: 10.7554/eLife.57445 (PMC7462612; doi:10.7554/eLife.57445)
Supplement: Figure 9—source data 3. [file elife-57445-fig9-data3.xls]

## Sheet: Sheet1
PD_info_Well_IsoUnitsANDStationary_FRvsCVISI
17.7638	1.05961
1.04909	2.56506
5.06548	4.49652
2.71309	1.33186
2.39653	0.667397
0.546513	1.54615
5.35604	1.27604
11.6866	1.85445
1.56339	1.58855
33.935	1.14917
26.5486	1.50668
1.37541	1.33869
13.2573	1.01909
1.19215	3.75027
1.16113	1.79666
1.63885	2.49234
2.49285	0.409184
4.0403	2.05336
2.53503	0.494251
2.49279	2.98328
0.676427	1.36251
0.283428	1.48148
1.43723	2.99465
0.320026	1.45159
14.5758	1.58212
2.46933	1.52288
0.649918	0.644859
8.05935	9.95481
4.65233	0.896383
23.9057	0.876915
29.2872	0.790602
7.03108	0.960228
4.11588	0.686029
2.94513	2.01087
1.21298	1.14235
11.6985	0.835687
22.2758	1.36216
9.4901	1.21121
2.76728	5.81132
2.73815	0.61858
3.75732	2.98445
2.41077	0.449069
24.8264	1.80051
50.6262	0.876002
63.5533	1.08092
3.67124	0.832105
46.241	0.796768
3.86007	1.4007
4.83615	0.935734
8.32114	1.15479
1.53902	1.30209
9.5424	1.63313
6.20724	5.16214
11.4324	0.783203
9.74655	0.809663
1.07784	2.01815
3.84489	1.38205
1.31311	2.41098
