# Supplementary material for: What is the true discharge rate and pattern of the striatal projection neurons in Parkinson’s disease and Dystonia?
Source: eLife. 2020 Aug 19;9:e57445. doi: 10.7554/eLife.57445 (PMC7462612; doi:10.7554/eLife.57445)
Supplement: Figure 9—source data 4. [file elife-57445-fig9-data4.xls]

## Sheet: Sheet1
DYST_info_AllUnits_FRvsCVISI
27.594	1.38337
19.3314	1.5052
17.1986	1.00037
24.8573	0.995285
18.9619	1.02762
17.601	1.0799
20.6072	1.04049
14.5359	1.00521
15.1184	0.963884
17.2305	0.981757
16.02	0.942661
44.2331	1.02676
37.1046	0.986036
20.6867	1.82305
29.2103	0.909256
21.4698	1.65225
47.1129	1.18759
51.8776	1.09456
54.5528	1.08521
50.3547	1.22737
49.1258	0.990363
24.8939	1.5214
8.59371	1.25662
7.31598	1.50095
56.4758	0.98156
15.277	0.901938
21.054	1.07641
16.0937	1.09266
21.0679	1.09613
23.9132	1.02082
11.9559	1.02426
12.1254	0.931555
15.0863	0.963347
6.81703	1.3068
24.1139	1.20218
11.7242	1.54915
49.8129	1.13538
8.57438	1.60921
48.1426	0.979608
29.1501	1.57912
18.2824	2.66539
13.2604	2.30693
24.343	1.75712
19.7681	1.59059
37.5522	1.00122
19.8077	0.975046
31.6098	1.05616
14.4122	1.01297
23.2273	1.06194
15.1376	0.904123
16.6676	1.01643
23.1418	0.99304
17.5563	0.977223
1.38138	2.23122
4.05874	1.84297
18.5196	0.949394
18.8521	0.948455
27.2274	0.999371
14.3007	0.969894
3.61823	2.64097
10.2807	1.20181
12.3491	0.938639
9.60056	1.34275
11.3267	1.00751
12.3173	0.987893
12.942	0.962883
15.6792	1.11994
15.4332	1.00781
18.1114	0.952713
16.1584	0.931581
13.486	0.879406
14.8494	1.04644
17.6323	1.00791
14.6336	0.88021
22.5438	0.849425
36.5722	0.822625
14.7308	0.96569
19.7486	1.42773
23.3477	0.964188
27.525	0.957859
20.6488	1.00418
16.8388	1.23658
17.975	1.01869
26.5587	1.28831
22.285	0.828741
24.0376	0.939824
18.897	0.96791
14.4862	1.06962
51.2858	0.9317
18.0009	1.05767
18.9041	0.886758
56.9607	0.832647
52.554	1.10383
53.3414	0.920737
31.5704	4.90557
9.85032	2.34343
15.3916	1.0512
17.3341	0.882458
16.1957	0.96688
12.7413	0.90496
20.2786	0.923685
41.2184	1.04521
11.9799	1.05687
16.4382	0.968786
42.2881	0.927717
34.268	1.03554
16.7327	0.992587
44.2735	0.970217
12.2165	0.962823
35.7148	1.0297
38.3261	0.945427
15.7205	1.01838
16.0625	1.14249
15.4468	1.02052
14.395	1.36451
18.3786	0.865729
13.0709	1.13741
5.70749	3.00071
25.7303	1.83037
7.5692	2.41717
15.2351	1.81753
52.9227	0.96116
11.4338	1.15841
12.0392	1.03452
12.0823	1.02217
13.7505	1.09947
23.191	1.16293
16.5648	0.967854
18.7212	0.984691
23.2122	0.955043
15.4725	1.0745
18.0329	1.08099
12.703	0.887849
12.6153	0.955703
18.1268	1.06355
16.9597	0.807765
31.328	1.37318
11.4338	1.11779
14.4944	0.92318
11.9963	1.02216
14.5074	0.986187
15.3224	0.988737
12.7816	1.03235
11.8631	1.23523
13.5255	1.03721
11.6666	0.883803
10.4427	3.31859
9.43152	5.24605
23.2008	1.00061
20.9517	0.927303
33.2996	0.990771
35.3076	0.935062
34.1425	1.0768
53.5575	0.903383
25.7917	0.939447
33.8768	0.877736
32.7318	0.917774
27.6327	0.914246
30.5405	0.900022
38.8752	0.930992
20.9805	0.954951
32.565	0.888721
41.1586	0.982248
46.3028	0.910284
47.8856	0.960761
30.0992	0.862824
32.9115	0.877784
62.7222	0.891346
14.6235	0.996139
10.9258	1.56122
30.7282	1.01455
7.47063	1.51195
46.7694	0.968619
15.7669	1.82826
15.2137	0.952118
30.3374	1.10005
23.5304	0.954542
26.4162	0.901664
21.6521	0.960594
10.8301	0.977025
30.77	0.954803
17.7627	1.12468
2.70103	3.02799
9.42053	1.21848
55.8181	0.868639
30.5373	0.983331
24.0771	0.971931
22.4977	1.04964
25.322	0.995849
0.77142	0.624549
28.1927	0.988962
22.6494	0.926117
34.3824	0.884635
28.2308	0.91032
13.3819	0.923341
28.8694	0.916435
27.3177	0.847771
1.72818	1.09171
24.7134	0.808447
37.6858	0.859346
37.5488	0.888086
0.249188	2.15165
34.2919	0.89208
25.508	0.949807
15.186	1.01077
18.7666	0.970922
14.6848	0.902003
18.7161	0.943526
18.7694	1.05467
19.4239	0.933587
24.4081	0.872145
26.9869	0.933432
16.4756	1.15599
19.0999	0.980827
0.155559	1.27869
0.868953	1.10244
16.5863	0.982895
22.4657	0.922171
23.3416	0.88003
20.242	0.925445
26.8389	1.12393
26.5804	1.1612
63.703	0.894934
52.9083	0.933982
13.8959	3.61223
15.5993	0.938131
48.9522	0.913932
25.1179	1.02711
42.7516	0.921147
33.721	0.862017
34.1442	0.882691
20.715	0.979699
45.9873	0.89573
28.4826	0.956983
33.5857	0.972932
9.95815	3.26201
78.5999	0.846115
52.0482	0.92239
26.9787	0.985026
68.7705	0.899823
22.2936	0.864341
63.451	0.912649
31.425	0.852858
41.3425	0.935312
25.8763	0.970421
36.258	0.919678
20.2432	0.852105
29.423	0.968676
13.677	0.916391
27.2301	0.914644
29.7559	0.902747
2.15661	1.94159
9.5373	0.896539
63.021	0.864941
21.9752	0.958554
50.7247	0.815482
25.6035	0.912684
28.2909	1.03397
21.5172	0.923108
20.1802	1.06426
26.4857	0.930833
51.8036	0.881937
22.6081	0.96803
16.6042	1.10071
69.0583	0.834895
7.78997	2.98532
41.649	0.877429
21.9594	1.01628
28.8854	1.16138
27.2174	1.00915
29.1045	2.19023
22.0093	0.944032
3.03341	1.6168
25.0716	0.939951
33.7817	0.979972
16.2786	0.91171
24.0571	1.00351
16.4124	0.938859
28.3256	1.08653
25.5218	1.01194
5.57117	2.82168
26.089	0.883323
38.9263	0.909075
28.9037	0.977508
30.991	0.882284
1.86435	2.31435
0.697953	1.2759
5.14022	1.39627
27.9252	0.96544
2.35279	1.30037
11.7623	2.5313
25.5402	0.891093
44.3025	0.941078
27.0525	0.939544
36.2058	0.896765
15.4377	1.03286
18.1904	1.01192
18.2611	0.934187
20.072	1.0183
23.4235	0.948596
27.4326	0.916763
17.9574	0.969201
20.9753	0.977117
25.4101	0.855141
22.9775	1.06509
22.127	1.23575
25.5049	0.914761
12.3093	1.11573
16.2183	0.9993
0.18018	1.27834
18.4068	0.976734
19.6486	0.903281
0.220131	0.826901
15.7637	0.986669
16.4125	1.15115
51.2508	0.8526
34.9279	0.874614
28.7216	0.837793
28.3544	0.967054
20.2187	2.45841
39.8501	0.91155
21.2306	0.98647
20.5423	0.977934
20.0925	1.00676
19.5912	0.939295
45.8583	0.913626
42.5079	0.938964
60.2546	0.924411
21.0784	1.06882
60.2558	0.905012
35.3814	0.981455
17.6369	1.02423
15.4067	1.0277
19.4443	0.936414
15.2376	1.16325
28.5087	0.977866
24.852	0.973446
17.4537	0.967564
21.0647	0.932189
26.1217	0.976881
16.5311	0.951068
20.8655	0.945806
19.2823	0.95899
15.4795	0.751349
23.6915	0.94715
18.9515	1.07432
28.0068	0.928353
19.8833	0.957026
24.1508	1.03907
20.4417	1.016
22.5622	0.924338
27.9141	1.03308
33.493	0.938156
37.2852	0.926071
22.7754	0.996923
19.9491	1.09488
24.23	0.934296
34.1955	0.952918
21.6923	0.979607
23.9209	1.00212
20.5267	0.992092
23.144	0.992487
0.166204	1.40951
24.2148	0.922686
23.8941	0.951635
22.1229	0.961498
27.6329	0.890641
59.1555	0.970416
20.1678	1.09791
18.4648	1.06337
21.1724	0.920705
18.98	0.890345
19.4735	0.952911
1.84268	1.26846
29.3674	0.942625
23.9301	0.973054
52.8407	0.947462
28.0378	0.979051
3.21529	5.38537
20.5787	0.910725
18.8625	0.90683
19.296	1.06745
21.5813	0.951603
27.2367	0.923151
22.5669	1.05181
18.2918	0.966986
23.4744	0.97849
35.1492	0.927966
37.8179	0.969341
14.5644	1.01259
21.1037	0.922245
18.5067	1.02304
37.4985	0.991526
19.9957	1.00162
17.1041	0.917092
16.2775	0.993608
16.8052	0.871005
22.493	0.970479
22.5059	0.927552
16.9007	0.955221
22.9624	0.996427
20.386	0.968815
21.5581	0.946728
30.3287	0.966007
15.3428	0.919473
12.0918	0.909429
15.5878	1.1339
14.3084	1.01423
65.0035	0.928382
29.6793	1.00429
23.9301	0.917904
7.27165	1.84207
29.8022	0.895728
77.6963	0.901942
23.8644	0.972164
21.1758	0.966321
10.5026	1.3273
17.6375	0.96185
22.3395	0.99703
18.2491	1.04886
19.9288	0.977372
24.6481	1.06469
0.213058	0.69873
19.0872	1.03502
16.4211	0.885856
16.3135	1.02841
0.647642	2.10751
13.2093	0.894594
18.5914	0.996549
17.5196	0.865889
4.96294	0.964076
26.4819	1.07104
23.5377	0.976531
21.563	1.14564
23.6867	0.918706
25.6349	1.04645
20.6296	1.01495
22.1667	0.924861
20.5608	0.93005
1.53455	1.24363
0.898282	1.84137
26.649	0.963583
18.7586	0.960366
27.9737	0.931022
19.0404	0.950166
23.7893	0.971487
17.2541	0.989931
1.52061	3.16318
16.4276	1.09559
17.0818	1.18865
18.1719	0.970844
16.2287	1.00525
19.2378	1.07238
16.4813	0.97208
19.5829	0.866833
19.2846	1.05937
14.4957	1.0598
23.324	1.11798
12.2385	1.0171
13.1127	1.09436
16.2322	0.999822
15.9917	0.910474
15.2066	0.986136
17.6302	0.998157
0.430741	0.878483
0.417759	0.869345
18.6724	1.07293
20.2723	1.06507
21.2059	1.06895
21.454	1.04308
21.4621	1.02189
21.2898	1.05962
20.3936	1.09217
23.2951	1.22673
24.7677	1.24984
23.568	1.02971
29.9459	1.04075
28.3334	0.918157
37.3078	0.907872
22.0658	1.02454
67.8182	0.864949
31.5424	1.14402
39.9527	0.98605
30.2054	1.42869
24.077	0.981406
27.4665	1.11116
22.4523	0.983064
21.7328	0.972759
23.0342	1.09443
28.2744	1.24659
24.3949	0.952671
4.3714	1.81132
25.2845	1.12468
32.4083	1.02157
27.5967	1.08782
26.9822	1.07064
19.6835	0.924199
20.2945	0.994834
17.6646	0.971509
18.3331	0.936053
20.2935	0.924182
19.7397	1.01768
19.9918	0.955233
40.0542	0.951763
28.8697	1.0322
13.1629	1.10353
14.0857	0.9734
2.18653	0.342517
34.3522	0.984639
27.3175	1.22351
54.5532	0.87114
27.7889	0.996216
29.6513	0.922739
19.6458	1.06307
19.818	1.16641
16.3784	1.11148
39.9933	0.992417
76.6759	0.916992
67.8013	0.902218
17.2188	2.84022
28.6039	1.00438
40.2411	0.985361
35.0816	1.0556
18.3296	0.93475
15.6796	0.945492
22.4906	0.988751
18.2803	0.999841
17.2919	0.998363
15.6428	1.12393
18.0099	0.956191
29.2272	1.21507
34.7375	1.14963
24.6901	0.965035
23.8381	0.936235
18.9881	1.11447
26.4847	1.19008
22.3685	1.02981
28.5331	1.00905
19.9138	0.935611
3.52364	0.641821
16.5554	1.21433
29.0002	1.03743
37.1287	1.04744
19.1672	1.61976
31.8706	0.929351
18.5379	1.02981
16.5877	1.11988
19.7889	0.914624
18.3331	1.02711
18.4012	1.01175
13.6874	1.02052
19.4317	1.07648
20.4055	1.07566
17.0731	1.28394
20.7754	1.03647
17.3572	1.03806
21.9314	1.00617
27.0146	1.01264
3.26252	0.789671
27.842	0.996191
25.1478	0.999124
22.6107	1.06397
21.7941	0.963884
57.9927	0.933983
25.6722	1.22633
17.7067	2.37234
41.8427	0.927294
37.7622	1.0818
61.1825	1.24634
28.3234	0.868688
26.3976	1.01056
28.2822	0.955631
23.1754	0.963995
20.6273	0.992817
6.84232	1.69632
26.6381	3.26295
57.6656	0.919517
67.3599	0.89701
41.7602	1.07981
53.7282	0.914405
4.85225	1.279
28.8824	1.0016
25.9675	0.960854
25.8611	0.972579
24.9013	1.10332
23.404	0.93753
25.4686	1.00253
33.3545	1.07649
21.6127	1.01277
18.7376	1.5634
21.5406	1.12511
18.602	0.943602
41.3562	0.99307
48.3007	0.942542
40.918	0.927188
59.0683	0.875259
53.715	0.881904
16.8124	2.50777
69.3737	0.858236
62.8841	0.920383
45.7364	0.969628
34.3202	0.850162
53.2089	0.896715
44.1184	0.895884
13.3168	1.4877
30.0411	1.07027
84.9066	0.827192
105.648	0.787455
47.8894	0.9044
72.467	1.00919
51.1658	0.92259
52.5987	0.933835
3.38963	0.492197
44.8181	0.975162
146.184	0.720595
10.6945	1.15039
37.9053	0.953618
55.5389	0.901773
55.8631	0.900122
67.266	0.896727
52.2297	0.918018
50.3169	0.934074
57.2938	0.871508
42.2977	0.92583
75.5963	0.817585
59.0683	0.875259
64.2918	0.877827
5.61472	1.82371
63.0115	0.962527
34.8088	0.97704
22.2728	0.855944
21.163	0.704858
21.3004	1.14032
61.8703	1.03545
51.9915	0.911063
28.4596	0.893283
62.7787	0.861234
46.4335	0.897701
45.4165	0.915078
43.8644	0.925009
33.0028	0.936725
53.1048	0.89757
40.4836	0.879373
14.3107	1.16058
39.3736	1.06767
114.285	0.773318
21.4041	1.3593
69.1725	0.802997
65.0366	0.892101
29.8833	0.928043
63.6499	0.852245
35.9032	0.962636
164.665	0.662039
33.7963	0.894641
51.1933	0.963818
72.0002	0.958307
44.2565	0.901716
89.6262	0.86374
20.2474	1.67477
48.9084	0.857692
137.878	0.717806
36.2243	0.97978
98.4974	0.828539
4.24948	0.869455
44.8751	0.917196
49.9019	0.937348
1.43269	3.09987
34.6812	0.937143
48.0189	0.904844
58.709	0.939148
55.4425	0.98133
29.022	1.60512
14.3107	1.16058
40.0521	0.95611
149.319	0.737829
1.56896	1.32321
21.0395	0.972128
97.7409	0.815163
126.325	0.728473
114.808	0.801
7.04803	2.61912
43.3348	0.935683
17.5529	0.929591
54.493	0.930719
52.705	0.971407
32.7578	0.944176
40.0449	0.963012
43.0908	0.929527
48.5604	0.817368
33.8811	0.937807
44.6846	0.939294
49.7168	0.918705
47.3623	0.943494
19.5272	1.1431
5.73057	1.63473
36.0166	0.996854
5.35435	0.832663
50.3558	0.852796
27.8222	0.970566
42.3589	0.978914
56.2277	0.92775
43.6928	0.997652
45.7425	0.960369
54.45	0.831823
50.2288	0.929361
52.8313	0.922392
78.1403	0.87638
46.699	0.950171
52.7939	0.933034
33.1874	0.923036
26.1546	0.981786
44.6846	0.939294
43.6142	0.93141
28.6968	1.30272
37.4525	1.01609
37.907	0.995082
49.8656	0.8894
18.5754	0.918789
51.8437	0.906209
28.1013	0.954097
1.59794	1.51131
42.1039	0.946555
37.3849	0.963167
27.9736	0.912906
35.1147	0.948506
14.4523	0.945386
34.843	0.928744
27.6649	1.00258
37.949	0.9633
38.7177	0.965942
22.2843	1.08668
47.8824	0.919759
37.2985	0.956057
39.7185	0.869914
41.6977	0.907804
42.3838	0.935826
22.1249	1.07196
21.51	1.00764
26.3269	0.909944
13.5627	1.81265
39.8312	0.950762
13.1221	0.826067
38.1719	0.923
34.93	0.941712
54.1293	0.889379
53.3313	0.888703
49.2114	1.63096
45.5669	0.891812
58.4416	0.890557
47.4533	0.902698
67.5975	0.840133
37.7735	0.859824
21.9069	1.29876
44.7172	0.961264
74.2236	0.885872
34.833	0.932147
61.625	0.900214
43.7219	0.888456
50.7346	0.878593
22.5633	0.893488
35.9189	0.889088
43.6502	0.61779
8.81399	0.62115
48.1871	0.890294
39.4557	0.964676
62.5686	0.843877
34.2131	0.950692
52.3512	0.934798
56.3485	0.895655
8.58678	1.71538
32.0668	0.954872
50.1108	0.897542
52.3504	0.905513
58.4318	0.851696
49.7971	0.876812
50.3697	0.899434
43.5254	0.903692
45.8483	0.979001
1.61613	3.93519
73.159	0.845834
55.8923	0.937536
39.2731	0.943709
106.846	0.809585
19.11	1.31351
4.74614	1.93218
49.4744	0.925892
45.1851	0.94399
119.638	0.806465
54.5743	0.88977
51.571	0.894841
41.0702	0.968786
74.1683	0.893759
109.894	0.796256
111.24	0.798296
3.28803	0.868292
59.7686	0.881619
39.1512	0.939305
67.6208	0.863666
39.8065	0.893881
50.6688	0.900954
113.321	0.689061
29.6383	0.946254
73.6399	0.840201
82.6312	0.815352
6.12507	1.71256
40.6423	0.899454
54.154	0.895883
38.0516	0.922464
44.7518	0.892852
52.8355	0.916455
161.241	0.665021
26.4192	0.889291
37.728	0.949544
39.5536	0.964109
56.691	0.915825
50.0452	0.878689
41.6389	1.00598
30.1803	0.966381
37.9078	0.917444
123.813	0.758117
46.1641	0.910391
47.8235	0.945382
29.4908	0.940555
35.8992	1.09859
161.176	0.661779
118.291	0.775061
27.4438	0.994449
34.5393	0.875833
48.746	0.945208
59.0211	0.890469
48.5452	0.878546
2.0668	0.98423
64.7084	0.871948
73.0908	0.881335
41.886	0.983601
51.8686	0.944286
45.7262	0.928396
41.9441	0.94373
33.3169	0.928438
44.6461	0.943536
43.8067	0.972833
57.7364	0.946937
23.5319	0.921711
49.5366	0.890991
57.7537	0.843671
24.4091	0.974415
46.0759	0.943377
46.7276	0.957835
45.489	0.894214
26.5529	0.944188
50.7055	0.933078
47.2209	0.95878
50.1177	0.950709
61.7823	0.94131
38.8028	0.935014
0.431573	1.29741
45.7608	1.08622
15.7361	1.0521
46.0823	0.936106
49.5015	0.945312
38.8026	0.903984
48.071	0.905597
39.2951	1.04972
35.0521	0.959527
38.2238	0.962401
24.6138	0.972736
36.9897	0.990625
21.1954	0.922561
9.14739	1.49077
34.5975	0.947935
33.2522	1.10156
37.2237	0.94768
34.2454	0.989263
34.3999	0.940616
35.403	0.934417
23.1611	0.924727
29.5839	0.980724
33.7019	0.981649
14.2958	1.0185
42.1503	0.900884
60.5889	0.934747
36.9329	0.939745
127.271	0.714572
75.2443	0.891174
43.2194	0.946848
13.4465	1.34104
59.1135	0.884505
35.5578	0.872295
23.0389	1.07912
41.0584	0.891677
28.4243	0.903652
51.3159	0.901809
60.4984	0.844184
38.1138	0.978196
59.9606	0.91107
76.5571	0.882338
82.6601	0.832275
51.4685	0.899169
14.3617	3.25016
10.0348	1.87161
5.80118	2.27819
49.5897	0.886635
54.7899	0.930517
44.6279	0.986266
22.3091	1.00326
17.5114	0.823623
38.1346	0.975757
54.9396	0.876744
75.3539	1.06207
31.7569	0.97181
5.79666	1.35459
18.2903	1.27505
45.3379	0.892522
82.4865	0.825081
121.505	0.73041
87.6745	0.807807
52.8957	0.893128
52.086	0.865037
33.8624	0.879172
25.9146	0.943763
30.7084	0.985977
46.0931	0.917161
44.4705	0.958573
18.5576	2.08091
41.9169	0.993954
65.341	0.891794
23.1408	1.24814
53.0368	0.960438
5.85591	1.60022
54.3038	0.930802
50.236	0.979162
46.259	0.969624
34.2523	0.985013
28.4243	1.02253
7.4064	2.19198
24.7615	1.36254
5.75994	1.10036
29.0059	1.06343
30.4044	0.993339
6.53498	0.875116
5.49239	3.6967
5.41809	3.24083
79.9714	0.896361
60.3987	0.935929
44.5108	0.923378
51.6556	0.920354
4.97388	3.02898
51.9204	0.837715
35.4314	0.913737
56.9773	0.936344
3.71448	2.05439
106.429	0.803622
24.1635	0.959693
17.8175	1.33456
52.5725	0.902346
53.1843	0.880737
52.2197	0.865519
33.5332	0.966594
44.088	0.940587
60.7824	1.13167
47.024	0.958946
49.631	0.938741
39.4944	0.916707
42.1413	0.977196
102.567	0.89901
49.6571	0.937819
48.4962	0.933566
5.69606	0.66802
67.8996	0.802156
3.47212	0.865091
67.3652	0.895599
41.4532	0.919828
39.6167	0.896876
32.3459	0.946704
77.6716	0.794305
2.30923	1.75649
75.0187	0.856356
45.7863	0.958808
35.4255	0.846158
44.2738	0.906983
36.6693	0.905925
49.3169	0.961503
34.5591	0.776911
54.9417	0.937271
45.1987	0.891786
42.8791	0.94082
104.811	0.836297
16.7326	1.04942
43.0031	0.940193
30.6452	0.990327
127.221	0.706344
90.1181	0.883694
2.57069	2.0036
54.7957	0.874817
57.082	0.885124
57.306	0.949761
28.1052	0.972992
36.3377	0.921518
80.2269	0.894433
87.3913	0.805392
45.1567	0.9761
32.3411	0.851805
36.3327	0.927844
53.3231	0.937911
51.589	0.793785
156.543	0.651816
38.0472	0.939536
136.011	0.72219
37.1699	0.975884
36.5992	0.899719
38.141	0.98104
31.7547	0.958203
148.714	0.692261
77.7643	0.88301
40.292	0.834405
41.581	1.00658
38.3367	0.996723
39.8055	0.925837
55.1637	0.832263
63.3583	0.920922
57.2981	0.946901
1.8669	0.636685
51.3212	0.825312
52.4125	0.930905
5.72727	1.12886
43.9248	0.969064
117.986	0.781996
36.6176	0.898578
55.8246	0.842012
47.4724	0.965487
26.4164	0.903794
45.2315	0.921413
40.1316	0.976244
0.403004	0.976389
2.5057	1.07925
23.2336	1.18621
56.2902	0.931701
44.2351	0.936812
60.0625	0.982197
45.1422	0.865107
30.3085	0.908499
25.3362	0.930322
49.4492	0.941652
29.3956	0.949104
24.0877	0.899201
34.6187	1.01524
47.2832	0.908332
37.9276	0.919005
42.6518	0.914243
42.3236	0.883127
36.8792	0.879303
25.8133	0.890022
40.0628	0.906831
35.6659	0.940285
31.663	1.0281
40.8969	0.9447
36.308	0.928001
26.222	0.881169
34.964	0.96388
34.7974	1.02246
29.6855	1.03261
37.9961	0.879525
27.1803	0.936059
42.5169	0.881439
42.5969	0.90485
53.4156	0.917824
43.0795	0.926022
116.668	0.74135
3.62146	5.75566
21.6207	1.84349
46.1495	0.928562
40.595	1.0107
83.4348	0.828204
19.055	2.16405
7.1215	3.07581
47.6837	0.980414
70.5939	0.910151
29.0106	0.75177
59.3968	0.852188
28.634	1.75785
17.8135	1.30633
42.7443	0.903528
53.2032	0.874935
63.8306	0.863436
37.2235	0.888806
31.2097	0.984601
33.3375	0.958566
46.3236	0.888004
58.5026	0.929845
32.5884	0.947568
32.2614	1.00629
57.4853	0.894874
44.3039	0.843759
103.79	0.76185
95.7241	0.951097
28.9439	0.96056
2.54641	1.07063
53.545	0.962252
54.268	0.986868
56.0936	0.831989
47.4473	0.933206
61.0273	0.905897
36.5006	0.972186
95.6219	0.787184
95.1112	0.855735
1.98001	1.82623
50.6373	0.937212
18.3134	1.36561
100.625	0.816865
91.4773	0.825838
76.1585	0.879959
4.51338	1.03251
104.49	0.808379
50.5224	0.933552
51.1054	0.884781
144.997	0.688721
32.0212	0.900536
41.0614	1.0215
3.73903	1.52594
26.4799	0.969732
2.26627	4.277
19.171	0.957935
41.6715	0.927884
55.5318	0.950208
1.957	2.02524
33.5023	0.940482
60.6876	0.876689
27.3617	1.02484
1.50473	0.733433
33.5515	0.929937
114.676	0.786396
62.0311	0.869098
31.2342	0.965818
52.2021	0.948679
41.0175	0.861302
18.6954	1.25605
47.0648	0.917952
45.5403	0.969602
2.80846	3.85587
12.6642	1.18796
42.2406	0.938712
59.3089	0.953319
20.8179	1.07714
40.7476	0.848465
23.5109	0.92165
57.955	0.845942
6.13019	2.27837
17.2236	1.08317
34.1844	1.00886
51.3717	0.882366
62.6161	0.921703
31.5673	0.896682
23.7618	1.02851
58.4225	0.914662
47.777	0.925958
31.0855	0.969811
64.1338	0.897151
49.5648	0.861152
56.5143	0.944105
35.9181	0.923657
27.509	1.07045
33.5274	0.990147
42.1134	0.999535
45.4459	0.899301
17.3608	2.53703
26.6967	1.01007
35.6527	0.841037
41.797	0.860518
23.1936	0.923128
29.591	0.939304
25.3304	0.965071
36.4254	0.997908
45.4365	0.911877
24.134	0.889168
0.663892	1.90421
31.2584	1.03765
39.9114	0.883451
36.5404	1.01324
35.5485	0.938297
34.8852	0.919947
49.7472	0.875384
37.2343	0.858915
55.1464	0.935544
45.4784	0.924202
39.3562	0.891234
36.5925	0.925424
35.8317	0.94413
36.1984	0.921196
40.6853	0.895676
46.8924	0.906562
38.0234	0.965674
24.6358	0.874126
38.5336	0.906792
48.5965	0.87881
36.0264	0.950483
19.5119	1.4142
44.1697	0.917411
39.5304	0.979033
36.8879	0.900964
57.1143	0.848057
37.3734	0.80035
38.0903	0.937124
36.3422	1.00239
28.3473	0.907945
120.172	0.727103
96.6245	0.774057
61.8929	0.748442
48.3213	0.906786
35.009	0.901633
44.7009	0.944667
28.0472	0.873085
52.027	0.889532
45.4892	0.920244
39.9536	0.929136
44.6859	0.916948
53.7236	0.917125
46.6175	0.84238
52.8677	0.879381
33.7199	0.878218
43.2429	0.913188
29.3011	0.910893
54.6257	0.870471
47.5316	1.00511
41.1809	0.929476
41.1524	0.925408
40.2453	1.0039
44.8965	0.924992
36.0651	0.934202
34.6432	1.03811
41.4139	0.952391
44.6151	0.917319
26.0297	1.07907
28.3204	0.978464
30.3161	1.00292
35.1327	0.974228
44.0827	0.88093
44.1743	0.930455
117.747	0.761511
33.0643	0.807154
47.8963	0.99015
30.9911	0.905203
114.281	0.770668
40.2072	0.967761
40.7542	0.928328
40.0579	0.823429
72.2487	0.866384
27.2725	0.837227
37.0444	1.02259
20.3516	0.913926
32.6351	0.888517
9.64343	0.704755
15.0143	1.09861
69.1361	0.887862
47.8683	0.930826
37.7331	0.865451
42.6646	0.923156
26.8359	1.00319
41.3723	0.882905
47.105	0.945454
32.6638	0.9121
36.0486	0.913178
47.997	0.905158
31.6999	0.912962
46.3816	0.877351
35.7373	0.958093
59.6392	0.898124
34.3531	0.983756
58.8076	0.859512
48.738	0.872826
27.8507	0.972746
32.2812	0.955395
47.2761	0.836785
44.5581	0.882692
25.5424	0.932275
43.6929	0.922192
22.1899	0.920295
41.9008	0.921101
30.9338	0.859796
37.5179	0.990192
40.7231	0.888101
25.1381	0.91153
24.2213	0.880719
31.593	0.894738
34.3073	0.901934
51.1174	0.95717
12.828	1.1423
32.7485	0.958322
22.0293	0.950095
39.4815	0.938771
25.6563	0.916892
35.1268	0.939482
9.69126	0.963567
23.8213	0.965753
13.5613	0.643839
35.3349	0.894691
35.4126	0.958726
43.1494	0.930059
29.8176	0.928952
48.0797	0.903115
59.0366	0.909466
48.3649	0.899242
46.8452	0.940167
36.6408	0.932537
34.0307	0.915116
40.0179	0.85708
40.4927	0.885137
48.1077	0.940887
8.89138	1.18875
61.0728	0.868311
44.6363	0.806988
45.7037	0.839906
27.3528	0.89261
15.0314	1.17081
29.6795	0.796494
36.7642	1.00038
42.5124	0.967081
29.1734	0.906082
32.2294	0.946102
37.8574	0.928424
27.4601	0.85397
32.7472	1.03684
29.0767	0.952542
24.7361	0.983649
28.5334	0.988647
34.7297	0.869846
34.1454	0.881977
24.2422	0.963446
18.1711	0.94887
31.2058	0.928648
33.6739	1.01291
26.8359	0.884738
42.0549	0.900491
31.2619	0.990703
36.9483	1.00864
42.2704	0.943397
32.6322	0.939208
35.4899	0.90219
31.524	0.874551
24.042	0.850859
29.817	1.05013
35.8814	0.963867
41.3614	0.875772
26.1664	0.994566
27.9705	0.945703
22.8347	0.965841
50.4085	0.876425
43.1819	0.937343
34.1831	0.860315
30.3483	0.808699
34.049	0.914546
40.3093	0.976816
39.607	0.958156
38.2365	0.938149
38.3225	0.975952
49.3125	0.899466
42.7955	0.940324
49.0067	0.899925
46.6913	0.882958
37.8031	0.991194
40.5775	0.902254
102.307	0.785417
37.3702	0.989807
32.9627	1.02137
60.0956	0.846829
55.2854	1.13152
40.5587	0.90077
34.7373	1.03322
48.2434	0.876245
15.7076	1.07691
62.4951	0.91555
75.3409	0.895092
52.3821	1.27051
13.6087	3.67316
40.6351	1.7494
60.615	1.16364
64.0471	1.28663
68.1779	1.19911
29.4041	1.37316
22.9177	1.4769
44.072	1.31776
5.20433	2.93834
44.867	0.84587
70.7742	0.900872
80.5747	0.896492
51.8792	1.0407
37.2561	0.965082
25.2034	1.04234
25.0355	0.934977
115.803	0.780235
35.1115	0.964913
44.442	0.926378
44.1014	0.914225
29.6587	0.883135
27.0781	0.99
61.5849	0.901721
40.7509	0.864543
35.4272	0.923539
42.4612	0.890285
35.7433	0.889363
36.1864	0.893503
25.046	0.900147
35.2625	0.942697
62.2504	0.882909
97.0764	0.875278
38.8143	0.889806
31.1716	0.906878
13.2375	1.59024
117.717	0.761152
55.7464	1.10321
16.4687	1.76124
33.7559	1.99634
110.273	0.838378
18.7547	2.24659
29.5813	1.7896
40.1689	1.29624
40.5115	1.69859
119.533	0.808668
127.868	0.740859
96.4984	0.893768
133.605	0.701352
39.774	0.640901
23.2601	3.5041
29.0113	1.29162
55.7044	0.95611
41.3897	0.941515
12.4757	0.975991
33.5211	0.975161
25.7903	1.05239
39.8007	0.915444
38.6238	0.968311
35.4014	1.01523
34.8803	1.01048
57.5127	0.89203
39.8344	0.905316
47.145	0.907696
47.0126	0.86148
47.7385	0.911928
36.7556	0.94469
38.7616	0.880445
27.8157	0.924714
47.8849	0.869736
21.1516	0.991406
33.357	0.956422
62.3634	0.874493
29.1222	2.10334
24.0296	1.89712
50.3032	1.01022
18.9565	1.56851
28.5733	0.983761
29.614	0.924853
31.3545	0.961993
26.7562	0.935282
26.8237	0.893843
20.5763	1.04854
38.2128	0.917745
34.4416	1.00167
35.5539	0.937119
35.2919	0.862607
27.1331	0.922034
30.9915	0.943875
25.7308	0.954662
20.9344	0.949897
8.21426	1.5717
29.9501	0.962444
48.8441	1.10853
15.253	0.96566
17.9645	1.16321
14.5853	0.892895
18.5066	1.03008
20.7194	0.98986
40.0231	0.931872
19.6519	0.995836
12.3944	1.20503
19.1165	0.971521
4.41603	3.1641
13.7966	1.08352
27.644	0.973042
13.5605	1.01849
42.2468	0.90694
29.7532	1.06314
10.762	4.90008
12.7697	1.22957
13.8057	1.76396
18.5723	0.980609
51.8953	1.05977
61.7673	1.21236
15.8817	0.905217
11.3778	1.11753
16.0435	1.0025
18.8625	1.00791
15.3299	1.70429
13.7483	0.882881
12.9229	0.988774
13.8942	0.912033
50.8486	0.978116
15.6917	0.983134
42.9767	0.94931
67.4998	0.907755
16.4293	1.19192
35.2193	1.05066
53.2814	1.06372
21.1709	1.04718
40.0022	0.959563
18.9892	0.915514
13.0178	0.923608
14.6459	1.06274
13.8023	0.937147
21.5012	1.07771
19.8945	1.06086
1.48925	1.68776
17.775	1.08001
11.1245	1.04365
11.0507	1.23699
23.1871	1.00157
29.7551	1.99242
12.868	0.971616
13.9724	1.14368
11.0147	1.03613
13.7801	1.03229
5.66105	1.53031
17.9191	0.986221
6.94712	1.67996
16.4687	0.93185
3.26444	2.3136
0.246367	1.3598
19.4083	1.01791
7.92166	0.981976
20.9415	1.05348
18.8498	0.947157
31.4449	0.899667
19.8402	0.879337
35.9988	0.823744
29.446	0.998484
16.1112	1.2711
22.1183	1.08202
31.6877	0.986417
14.1472	4.68679
17.7158	0.940299
16.9845	2.48457
15.6452	1.5166
58.0452	1.08466
15.6131	1.02038
22.622	0.907905
19.758	0.981005
59.427	1.00458
41.2566	0.951405
12.3184	1.01952
11.0471	0.985057
8.24949	1.19568
29.6752	0.944134
17.0589	0.99836
46.9513	0.98076
25.163	1.04546
14.9604	0.887171
12.1263	1.21013
28.3522	1.09209
50.9708	0.931342
8.67819	1.03183
49.33	1.07023
47.4337	1.02356
13.3368	0.957011
24.7013	0.94368
13.1173	0.951533
2.78168	1.02778
18.4777	0.968856
18.9242	1.01848
20.8305	0.929424
14.5557	0.931347
5.8892	3.90231
12.1985	1.07658
5.62658	1.33314
12.2727	1.09595
16.094	0.929897
21.7904	0.947235
21.1517	0.881569
22.8976	1.08669
1.82852	1.52984
11.3353	1.35063
16.9561	0.945834
16.9168	0.92108
10.6711	1.59105
16.9456	0.908861
13.6254	1.03649
14.593	0.960006
17.7719	0.965305
13.7754	1.22293
12.7676	0.95233
64.9904	0.978181
35.5908	0.965171
34.7097	1.01805
27.0266	0.945781
20.6443	0.993426
23.3123	1.16039
19.3798	1.05808
17.8631	0.564883
22.8549	1.04554
8.68715	3.97172
46.6115	1.07219
25.6448	1.10507
27.6299	0.945909
1.0194	1.09583
16.6204	2.20417
12.6223	1.33971
38.4825	0.962047
67.2666	1.69925
38.0591	0.794015
24.9411	0.92279
13.3897	3.84553
22.9115	1.03491
71.6593	0.914159
68.9997	0.881245
44.5149	0.967367
33.6061	0.991906
33.2255	0.85815
33.3273	0.930728
79.1836	0.878333
43.4379	0.902672
33.7241	1.03984
8.46465	1.28641
33.1206	1.07362
38.3517	1.00771
44.176	0.922682
24.8732	1.03454
17.5081	1.04384
26.7007	0.944479
18.7241	0.984205
63.5904	0.89499
21.5435	0.958513
69.0328	0.906255
17.8887	1.1333
14.599	1.87874
24.5684	0.92807
69.6901	0.887239
55.9596	1.05922
65.7389	0.901334
2.00141	2.2092
55.7084	0.93176
59.3697	0.879935
15.8381	0.972026
71.0664	0.893855
20.2679	0.939296
14.15	1.83074
3.10662	4.64139
11.4285	1.57119
20.6827	0.997436
0.188781	0.399884
24.4451	0.955441
3.02198	1.84314
8.5482	2.24398
49.6851	0.883637
75.8647	0.850569
26.8393	0.996857
22.226	1.02084
27.514	0.970481
25.7547	0.985521
15.5863	1.03709
33.4849	1.05116
1.91343	1.82655
32.3396	0.961755
28.4665	0.962766
0.271142	0.361478
25.2551	1.07347
32.7317	0.969972
18.123	0.962308
27.2256	0.976569
32.9849	1.00335
17.6717	1.0152
16.9391	1.04075
17.7594	1.02211
0.0772432	0
18.9429	1.03502
20.7316	0.966161
17.4887	0.996739
28.3801	1.00534
4.66876	3.90908
24.0639	0.90921
59.7587	0.878953
37.4329	1.6141
21.6644	1.00178
19.2029	1.00318
34.9391	0.958554
17.0381	0.906794
37.3544	0.916277
37.2438	0.956971
25.6509	0.951341
26.6196	0.744757
39.7259	1.05727
22.4897	0.949557
25.7356	0.916468
30.5089	1.0088
29.727	0.960912
20.4678	0.90421
41.1134	0.95747
28.0201	1.00181
25.4036	1.12016
24.8763	0.937192
21.08	0.550463
39.6269	0.976159
46.1373	1.06207
20.2201	0.979005
16.4515	0.905984
34.6573	0.902753
17.8901	0.997079
6.08739	1.37456
2.77437	1.908
21.3436	1.01973
66.6014	0.823583
56.2019	0.924673
28.352	0.913925
20.9897	0.962722
30.9456	0.890534
29.3331	0.915485
27.0113	0.952386
44.4898	0.93956
22.5287	0.951003
49.1807	0.946178
0.368538	1.65432
63.8197	0.890697
14.5949	0.925521
1.33314	1.16831
15.2154	0.850609
16.6509	0.950414
29.0535	1.04561
31.5269	0.985269
26.7326	0.961314
20.7311	1.04467
24.5613	1.00792
29.0739	0.984795
30.9088	1.02365
6.31533	1.09512
0.255363	1.56737
14.7845	0.979612
30.7729	0.967382
18.1677	1.0576
16.1962	1.00994
15.9539	1.21722
0.154523	0.75202
17.4802	0.927963
16.8798	1.09809
26.5548	0.972615
17.0373	0.982631
29.0224	1.01623
21.699	0.953387
16.8155	1.0288
27.4158	1.04516
24.7272	1.15088
27.786	0.869648
38.3491	1.1799
28.9676	1.01413
40.8981	0.939096
68.0914	0.945525
70.3424	0.88593
69.4759	0.890986
60.1426	0.927424
28.2989	0.972173
24.5247	0.988144
5.76304	2.09716
26.5346	0.959963
2.83537	1.60684
18.7663	3.73471
3.24517	1.66026
18.7904	1.35191
18.8201	0.964152
21.5244	0.956198
42.4757	0.969522
31.8948	1.01325
25.3465	0.893737
17.0343	0.995076
33.9215	0.919038
5.79582	0.99757
24.8462	0.946728
38.1878	0.966284
23.3144	1.01645
26.2654	1.05643
19.7927	1.12746
16.3991	0.979477
21.2791	1.18522
21.954	0.977462
36.4848	0.956932
23.3362	0.91843
19.4925	1.07697
5.49985	3.97454
45.5741	0.991547
17.4402	0.941804
23.041	0.903487
2.05612	0.98206
35.3402	0.943718
18.1814	1.12732
16.5939	0.910291
98.8124	0.812933
29.2298	0.925987
2.52618	0.609149
11.2595	1.31267
19.0066	0.993472
29.6848	1.00573
23.2651	0.825834
24.6503	0.972585
22.4906	1.02819
10.3409	1.55373
17.0597	1.32301
66.0213	0.892167
28.7017	0.965408
45.9096	1.00855
21.9803	2.7922
34.6767	0.980405
13.5686	0.979009
68.1009	0.864683
16.1852	0.938808
40.4791	0.944985
14.1837	1.10691
0.452852	0.990622
23.6261	0.883857
13.7979	0.948258
22.7359	1.01793
13.6316	0.928174
5.74043	2.93329
14.6287	1.22434
6.55999	2.52643
60.8302	0.899243
15.4369	1.1714
14.9398	0.992985
56.886	0.935327
3.16316	0.761946
15.0167	1.21457
19.9365	1.06029
3.35933	1.0478
14.7889	0.99691
80.8042	0.885356
2.92314	1.19714
16.4217	0.993663
21.0895	0.939146
10.3199	1.07348
25.5893	0.973644
12.9971	1.27354
23.698	0.96333
69.2878	0.960142
34.1127	1.00076
16.704	1.67721
65.7223	0.945902
23.3665	1.07458
32.8778	0.906097
4.11396	1.04933
24.91	0.956788
18.4764	1.0084
16.194	1.09453
22.9587	1.01654
19.4249	1.0022
23.389	0.891208
30.5236	0.908104
13.9321	1.01986
22.0228	0.892853
3.18165	0.710927
2.63025	1.40772
42.2119	1.24674
2.54415	4.77764
2.14885	1.68738
27.577	0.972652
38.1632	0.896776
18.8545	0.878238
0.443057	1.95799
1.08631	1.03105
16.4335	0.953476
15.5965	1.02301
1.14899	1.98489
34.9361	0.961348
28.8905	1.08421
31.6328	0.996234
15.9145	1.03382
23.669	0.997861
32.7865	0.948752
2.81635	1.99969
11.3097	1.11384
14.2056	1.03286
16.7185	1.05568
25.0217	0.938044
14.4942	1.01439
16.3075	1.00951
14.6444	1.02477
19.7575	0.972939
19.5736	0.891004
33.7785	0.908754
21.5915	0.917747
25.6973	0.888674
19.5535	0.859843
18.9377	0.982288
15.8225	1.00649
25.1342	1.21501
19.2707	1.08242
13.5341	1.49195
21.211	0.989233
18.4117	0.974541
18.8019	1.02893
15.7582	1.02348
17.4565	0.907391
28.6966	0.940769
16.3876	0.983376
22.2618	0.952573
39.7678	0.924688
34.2433	0.926375
44.1837	0.858124
29.4919	1.19717
47.01	0.87159
50.7306	0.794289
31.003	0.916658
40.1279	0.920817
37.6426	0.851712
40.9379	0.941856
14.2294	1.29086
42.7182	0.874303
11.1855	1.016
36.4307	0.952743
38.4299	0.912312
34.6483	0.905951
27.5415	0.889614
10.8373	1.93568
42.273	0.897421
28.5591	0.964334
38.5119	0.976427
39.9312	0.878821
41.0914	0.899312
27.5258	0.863996
92.8477	0.809869
79.9852	0.877271
32.5532	0.944444
35.4162	0.906614
24.0186	0.876643
1.9319	0.730897
90.7062	0.766017
41.977	0.961008
76.1647	0.808084
32.7961	0.839236
45.1046	0.865428
40.6195	0.892681
30.4671	0.956234
115.444	0.715511
32.8301	0.938845
41.9629	0.884932
23.4421	0.910582
42.9493	0.954969
44.5405	0.967253
38.9294	1.01257
19.3432	0.926279
42.2482	0.926354
32.7985	0.939467
41.2139	0.889432
46.2893	0.857366
34.5711	0.873027
40.7896	0.899397
25.2988	0.938065
21.2866	0.969367
5.03949	1.46759
0.336781	0.701745
32.1282	0.907803
1.48275	0.396991
33.8457	0.963238
27.4499	0.943112
47.1936	0.89892
27.809	0.939135
35.5911	0.893045
24.0105	0.914673
29.4541	0.854476
38.4604	0.964062
31.2726	0.998661
1.91745	0.693278
37.4781	0.863211
29.9735	0.978442
27.9617	2.88886
49.5569	0.893889
3.58507	0.83717
59.2987	0.776018
33.2295	0.870128
38.4673	0.902809
42.9084	0.825356
54.3958	0.833267
18.9292	0.858335
33.1435	0.867739
45.8102	0.91351
37.29	0.87937
53.6728	0.826079
48.8557	0.788439
30.3077	0.646111
21.4431	0.641031
42.8911	0.914089
47.3036	0.832354
36.9389	0.918561
49.6648	0.907863
43.5375	0.877451
49.7923	0.841979
31.2815	0.785753
50.2566	0.898214
50.0567	0.87687
42.6332	0.88708
36.6872	0.955667
44.0908	0.873673
48.508	0.855165
22.9882	0.943358
35.5578	0.886653
38.4312	1.02532
55.6627	0.952941
[truncated: 321 more rows]
