# Supplementary material for: What is the true discharge rate and pattern of the striatal projection neurons in Parkinson’s disease and Dystonia?
Source: eLife. 2020 Aug 19;9:e57445. doi: 10.7554/eLife.57445 (PMC7462612; doi:10.7554/eLife.57445)
Supplement: Figure 9—source data 5. [file elife-57445-fig9-data5.xls]

## Sheet: Sheet1
DYST_info_Well_IsoUnits_FRvsCVISI
13.2604	2.30693
1.38138	2.23122
36.5722	0.822625
16.8388	1.23658
5.70749	3.00071
25.7303	1.83037
10.4427	3.31859
15.7669	1.82826
0.77142	0.624549
0.249188	2.15165
0.155559	1.27869
0.868953	1.10244
9.95815	3.26201
2.15661	1.94159
9.5373	0.896539
50.7247	0.815482
3.03341	1.6168
5.57117	2.82168
1.86435	2.31435
0.697953	1.2759
20.2187	2.45841
1.84268	1.26846
3.21529	5.38537
7.27165	1.84207
1.53455	1.24363
0.898282	1.84137
0.430741	0.878483
4.3714	1.81132
2.18653	0.342517
3.26252	0.789671
26.6381	3.26295
4.85225	1.279
10.6945	1.15039
1.43269	3.09987
1.56896	1.32321
8.81399	0.62115
1.61613	3.93519
4.74614	1.93218
0.431573	1.29741
14.3617	3.25016
10.0348	1.87161
3.71448	2.05439
2.30923	1.75649
2.57069	2.0036
1.8669	0.636685
0.403004	0.976389
3.62146	5.75566
7.1215	3.07581
17.8135	1.30633
2.54641	1.07063
2.26627	4.277
1.957	2.02524
1.50473	0.733433
17.3608	2.53703
24.6358	0.874126
19.5119	1.4142
9.64343	0.704755
15.0143	1.09861
13.5613	0.643839
13.2375	1.59024
18.7547	2.24659
48.8441	1.10853
4.41603	3.1641
1.48925	1.68776
3.26444	2.3136
0.246367	1.3598
64.9904	0.978181
17.8631	0.564883
1.0194	1.09583
67.2666	1.69925
14.15	1.83074
3.10662	4.64139
3.02198	1.84314
8.5482	2.24398
1.91343	1.82655
26.6196	0.744757
21.08	0.550463
1.33314	1.16831
0.255363	1.56737
0.154523	0.75202
2.83537	1.60684
18.7904	1.35191
5.49985	3.97454
17.0597	1.32301
3.16316	0.761946
3.35933	1.0478
2.92314	1.19714
2.54415	4.77764
0.443057	1.95799
1.08631	1.03105
1.14899	1.98489
14.2294	1.29086
11.1855	1.016
1.48275	0.396991
27.9617	2.88886
3.58507	0.83717
3.93298	1.66529
8.35078	6.02668
23.6671	1.70159
25.6032	10.3182
29.0842	1.35025
3.21974	1.93486
0.984466	1.36591
