# Supplementary material for: What is the true discharge rate and pattern of the striatal projection neurons in Parkinson’s disease and Dystonia?
Source: eLife. 2020 Aug 19;9:e57445. doi: 10.7554/eLife.57445 (PMC7462612; doi:10.7554/eLife.57445)
Supplement: Figure 9—source data 6. [file elife-57445-fig9-data6.xls]

## Sheet: Sheet1
DYST_info_Well_IsoUnitsANDStationary_FRvsCVISI
13.2604	2.30693
1.38138	2.23122
10.4427	3.31859
0.77142	0.624549
0.249188	2.15165
0.155559	1.27869
0.868953	1.10244
2.15661	1.94159
3.03341	1.6168
5.57117	2.82168
0.697953	1.2759
1.84268	1.26846
1.53455	1.24363
0.898282	1.84137
0.430741	0.878483
4.3714	1.81132
3.26252	0.789671
4.85225	1.279
8.81399	0.62115
1.61613	3.93519
0.431573	1.29741
3.71448	2.05439
2.30923	1.75649
1.8669	0.636685
0.403004	0.976389
3.62146	5.75566
7.1215	3.07581
2.54641	1.07063
1.957	2.02524
1.50473	0.733433
9.64343	0.704755
15.0143	1.09861
13.5613	0.643839
13.2375	1.59024
18.7547	2.24659
1.48925	1.68776
0.246367	1.3598
64.9904	0.978181
17.8631	0.564883
3.02198	1.84314
1.91343	1.82655
0.255363	1.56737
0.154523	0.75202
2.83537	1.60684
18.7904	1.35191
3.16316	0.761946
2.92314	1.19714
0.443057	1.95799
1.08631	1.03105
1.14899	1.98489
14.2294	1.29086
11.1855	1.016
1.48275	0.396991
3.93298	1.66529
29.0842	1.35025
3.21974	1.93486
0.984466	1.36591
